# Supplementary material
Source: publisher figshare collection journal article supplement (https://acs.figshare.com/ndownloader/files/3913834)

# Catalytic, Nucleophilic Allylation of Aldehydes with 2-Substituted Allylic Acetates: Carbon-Carbon Bond Formation Driven by the Water-Gas Shift Reaction

Scott E. Denmark,\* and Zachery D. Matesich

*Roger Adams Laboratory, Department of Chemistry, University of Illinois, Urbana, IL 61801*

## SUPPORTING INFORMATION

| <b>TABLE OF CONTENTS</b>                       | <b>PAGE</b> |
|------------------------------------------------|-------------|
| General Experimental                           | <i>S2</i>   |
| Literature Preparations                        | <i>S4</i>   |
| GC Response Factors                            | <i>S4</i>   |
| Optimization Studies                           | <i>S8</i>   |
| References                                     | <i>S18</i>  |
| <sup>1</sup> H and <sup>13</sup> C NMR Spectra | <i>S19</i>  |

## General Experimental

**Reaction Setup:** All carbonylation reactions were performed in a six-well autoclave (Figure S1), which allows for independent control of gas pressure in each well via the individual valves, equipped with a temperature probe connected to a magnetic stirrer bearing a heat control element. All other reactions were performed in oven (160 °C) and/or flame dried glassware under an atmosphere of dry argon unless otherwise noted. Room temperature (rt) was approximately 23 °C.

**NMR Spectroscopy:**  $^1\text{H}$  and  $^{13}\text{C}$  spectra were recorded 400 MHz,  $^1\text{H}$  (100 MHz,  $^{13}\text{C}$ ) and 500 MHz,  $^1\text{H}$  (126 MHz,  $^{13}\text{C}$ ), spectrometers. Spectra were referenced to residual chloroform (7.26 ppm,  $^1\text{H}$ ; 77.16 ppm,  $^{13}\text{C}$ ) or when the chloroform peak is obscured in the  $^1\text{H}$  NMR spectrum, to isolated singlets in the product spectrum corroborated with a more diluted sample. Chemical shifts are reported in parts per million (ppm), multiplicities are indicated by s (singlet), d (doublet), t (triplet), q (quartet), quint (quintet), m (multiplet), and br (broad). Coupling constants,  $J$ , are reported in Hertz with integration provided and assignments indicated. Assignments are corroborated by 2D experiments (COSY, HMQC, HMBC).

**Infrared Spectroscopy:** Infrared spectra (IR) were recorded in NaCl cells or using an FT-IR instrument. Peaks are reported in  $\text{cm}^{-1}$  with indicated relative intensities: s (strong, 67-100%); m (medium, 34-66%); w (weak, 0-33%).

**Mass Spectrometry:** Electron Impact (EI) spectra were performed at 70 eV using methane as the carrier gas, with a time-of-flight (TOF) mass analyzer. Chemical Ionization (CI) spectra were performed with methane reagent gas, with a TOF mass analyzer. Electrospray Ionization (ESI) spectra were performed using TOF mass analyzer. Data are reported in the form of  $m/z$  (intensity relative to the base peak = 100).

**Melting Points:** Melting points (mp) were determined in vacuum-sealed capillary tubes and are corrected.

**Elemental Analysis:** Elemental analysis data is the average of 2 runs.

**Distillation:** Bulb-to-bulb distillation was performed on a Kugelrohr, with boiling points (bp) corresponding to uncorrected air-bath temperatures (ABT). A vacuum of  $10^{-5}$  torr was achieved using a diffusion pump.

**Liquid Chromatography:** Analytical thin-layer chromatography was performed on silica gel 60 F254 plates. Visualization was accomplished with UV light and/or potassium permanganate ( $\text{KMnO}_4$ ) solution, Cerium-ammonium-molybdate (CAM), or 4-anisaldehyde (PA) solution. Retention factor ( $R_f$ ) values reported were measured using a  $10 \times 2$  cm TLC plate in a developing chamber containing the solvent system described. Flash column chromatography was performed using 40-63  $\mu\text{m}$  particle size (230-400 mesh, 60 Å pore size)  $\text{SiO}_2$ . Preparative, radial, centrifugally accelerated, thin-layer chromatography was performed using glass-backed, circular TLC plates prepared with silica gel (high-purity grade, pore size 60 Å, 2-25  $\mu\text{m}$  particle size, without binder, with fluorescent indicator, pore volume 0.75  $\text{cm}^3/\text{g}$ ) and calcium sulfate hemihydrate ( $\geq 99\%$ ).

**Gas Chromatography:** Analytical gas chromatography (GC) was performed using a flame ionization detector. GC methods were used in the analysis of the products.

**Solvents:** Reaction solvent dioxane (HPLC grade) was distilled from sodium. Reaction solvents tetrahydrofuran (HPLC grade), diethyl ether ( $\text{Et}_2\text{O}$ ) (ACS grade, BHT stabilized), and dichloromethane (HPLC grade) were dried by percolation through two columns packed with neutral alumina under a positive pressure of argon. Triethylamine (ACS grade) and pyridine (ACS grade) were distilled from  $\text{CaH}_2$ . Solvents for chromatography were: hexanes (Optima

Grade), ethyl acetate (ACS Grade), diethyl ether (ACS Grade), and dichloromethane (ACS Grade).

**Chemicals:** Ruthenium (III) chloride hydrate was purchased from Strem Chemicals. Triruthenium dodecacarbonyl was obtained from Sigma Aldrich and sublimed prior to use and subsequently stored in the glove box. Carbon monoxide gas was CP grade. Methallyl alcohol, benzaldehyde, 4-methoxybenzaldehyde, 4-trifluoromethylbenzaldehyde, (*E*)-cinnamaldehyde, hydrocinnamaldehyde, pivalaldehyde, isovaleraldehyde, 2-tolualdehyde, 3-chloro-2-methylprop-1-ene, and acetyl chloride were distilled prior to use. 4-Nitrobenzaldehyde was sublimed prior to use. “Brine” refers to a saturated solution of sodium chloride in water. All other reagents were used as received.

### Literature Preparations

The following compounds were prepared according to literature procedures and had spectroscopic data consistent with literature: 3-(hydroxymethyl)but-3-en-2-one,<sup>1</sup> 2-(diethoxymethyl)prop-2-en-1-ol,<sup>2</sup> 2-methallyl acetate **2b**,<sup>3</sup> ethyl 2-(acetoxymethyl)acrylate **2l**,<sup>4</sup> tert-butyl 2-(acetoxymethyl)acrylate **2m**,<sup>5</sup> 2-phenylallyl acetate **2o**,<sup>6</sup> ((2-methylallyl)oxy)benzene **2k**,<sup>7</sup> 2-methylallyl 2-chloroacetate **2d**,<sup>8</sup> and 2-methylallyl 2,2,2-trichloroacetate **2c**.<sup>9</sup>

### GC Analysis and Response Factors

Retention times ( $t_R$ ) and integrated ratios were obtained from reporting integrators. Response factors for quantitative GC analysis were obtained using the following equation: response factor of compound = (area compound  $\times$  mmol tetradecane)/(mmol compound  $\times$  area tetradecane). Under the conditions employed, the retention time for tetradecane was 7.174 min. Three to five samples with internal standard were prepared and dissolved in EtOAc. A small

portion of each sample was diluted further to ~1.5 mL. And aliquot of each sample was injected into the GC in triplicate. The average of the 9-15 response factors was used to calculate the amount of compounds by equation 2.

GC Method: Injections were made onto a Hewlett-Packard HP-1 (30 meter) capillary column. Injector temperature was 250 °C; the detector temperature was 300 °C with a H<sub>2</sub> carrier gas flow of 16.7 mL/min. The column oven temperature program is as follows: 75 °C for 0 minutes, 75 °C to 250 °C ramp at 30 °C/minute, 250 °C for 6.2 minutes. Total run time is 12 minutes.

**GC Method Parameters**

| Compound                                                        | Response Factor | <i>t<sub>R</sub></i> , min |
|-----------------------------------------------------------------|-----------------|----------------------------|
| benzaldehyde ( <b>1a</b> )                                      | 1.872           | 3.099                      |
| <i>trans</i> -cinnamaldehyde ( <b>1b</b> )                      | 1.790           | 6.264                      |
| hydrocinnamaldehyde ( <b>1c</b> )                               | 1.850           | 5.489                      |
| 2-methylallyl acetate ( <b>2b</b> )                             | 2.513           | 2.452                      |
| 2-methylallyl 2,2,2-trichloroacetate ( <b>2c</b> )              | 3.024           | 5.436                      |
| 2-methylallyl 2-chloroacetate ( <b>2d</b> )                     | 2.656           | 4.098                      |
| 2-methylallyl 2-chlorobenzoate ( <b>2e</b> )                    | 1.333           | 5.436                      |
| ethyl (2-methylallyl) carbonate ( <b>2f</b> )                   | 2.976           | 3.630                      |
| 2-methylallyl benzoate ( <b>2g</b> )                            | 1.439           | 6.781                      |
| 1,3,5-trichloro-2-((2-methylallyl)oxy)benzene ( <b>2h</b> )     | 1.465           | 7.531                      |
| 1,3-dichloro-5-((2-methylallyl)oxy)benzene ( <b>2i</b> )        | 1.483           | 8.043                      |
| 1-((2-methylallyl)oxy)-4-(trifluoromethyl)benzene ( <b>2j</b> ) | 1.458           | 5.795                      |
| ((2-methylallyl)oxy)benzene ( <b>2k</b> )                       | 1.437           | 5.593                      |
| <i>tert</i> -butyl 2-(acetoxymethyl)acrylate ( <b>2m</b> )      | 1.824           | 2.927                      |
| 2-methylene-3-oxobutyl acetate ( <b>2n</b> )                    | 2.601           | 4.549                      |
| 2-phenylallyl acetate ( <b>2o</b> )                             | 1.359           | 6.713                      |
| 3-methyl-1-phenylbut-3-en-1-ol ( <b>3ab</b> )                   | 1.306           | 6.598                      |
| 5-hydroxy-3-methylene-5-phenylpentan-2-one ( <b>3an</b> )       | 1.534           | 7.927                      |
| Tetradecane                                                     | --              | 7.174                      |

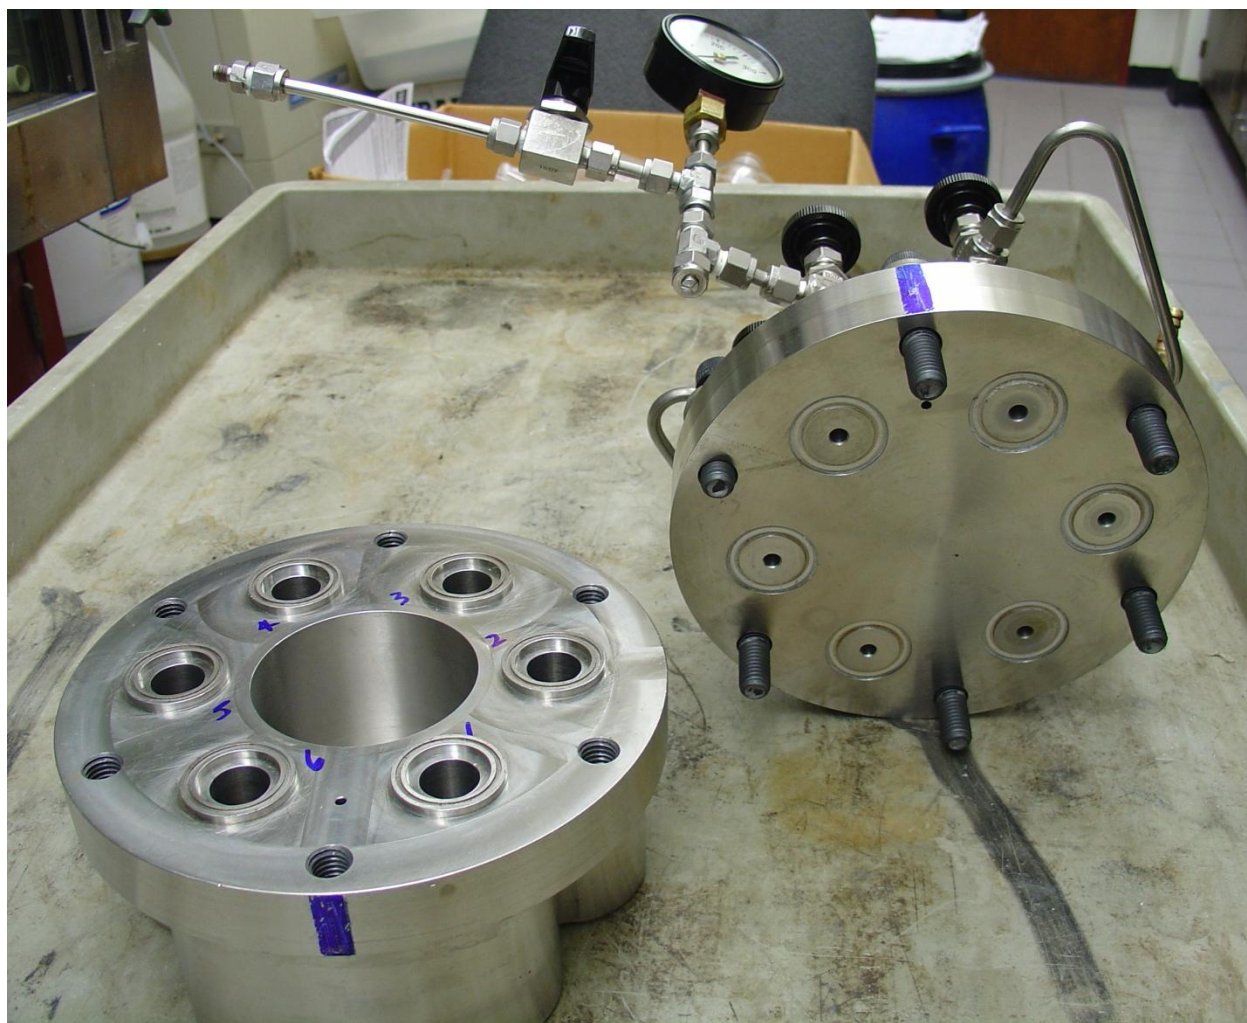

**FIGURE S1(A).** The six-well autoclave: open

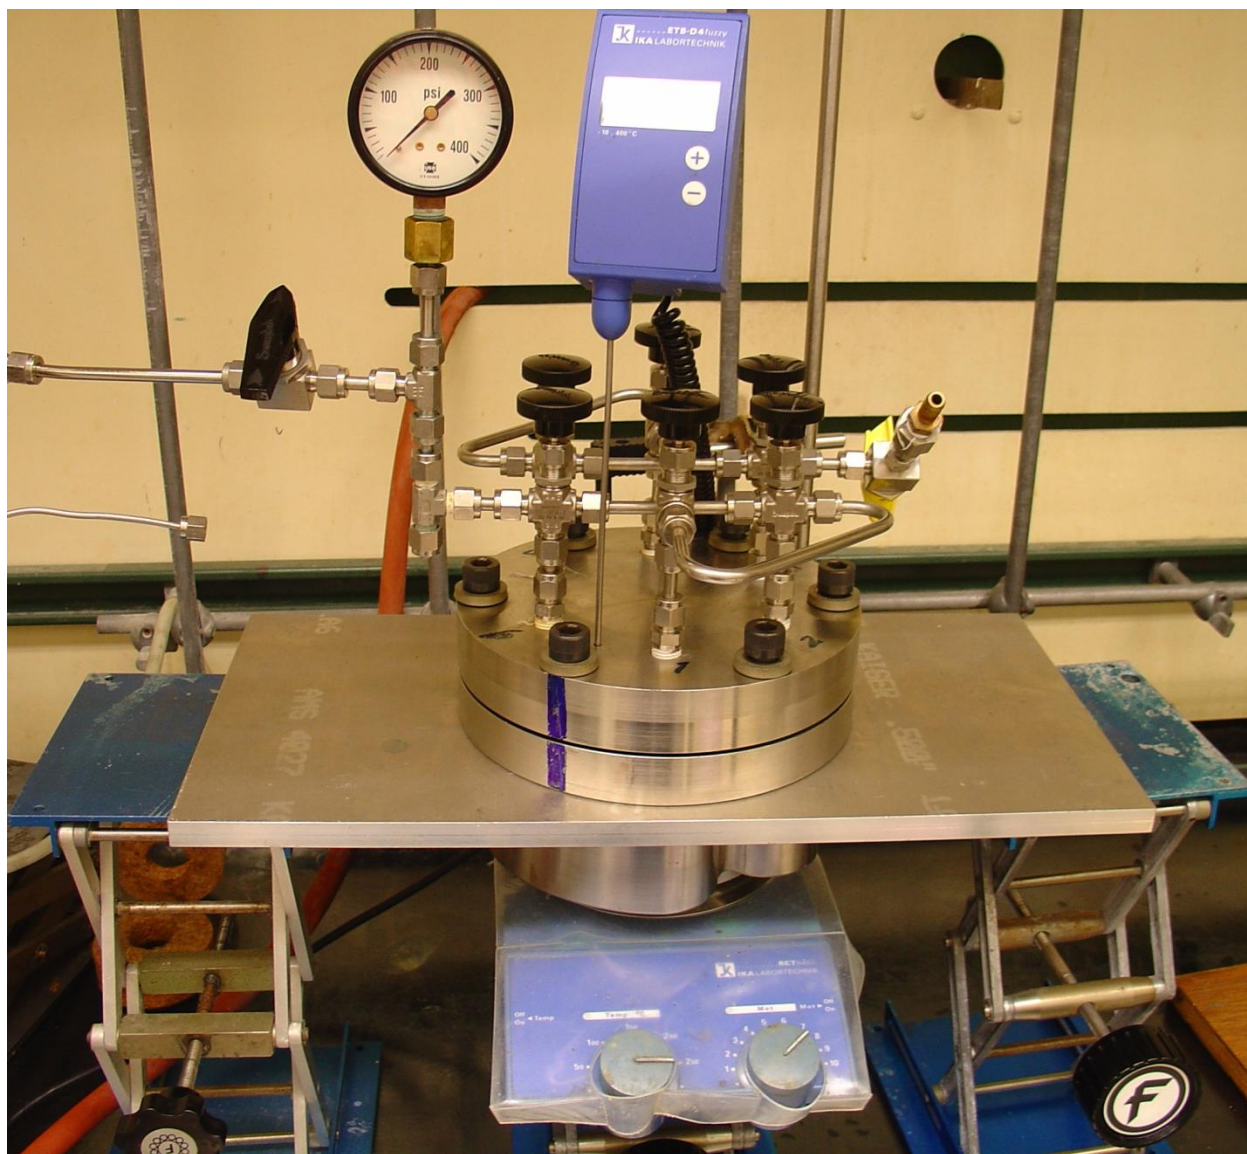

**FIGURE S2(B).** The six-well autoclave: closed

## Optimization Studies

In all cases, product distributions were assessed by GC (see General Experimental section for details), employing tetradecane as the internal standard, and the observed retention times of products **3** were compared to those of their authentic samples.

### *General Procedure*

All reactions were run in a 10-mL, flat-bottomed, glass tube (1.5 x 6.5 cm) containing a Teflon-coated, magnetic stir bar. In the glovebox, the tube was charged with  $\text{RuCl}_3 \cdot x\text{H}_2\text{O}$  or  $\text{Ru}_3(\text{CO})_{12}/\text{TBACl}$  before being covered with a rubber septa and removed from the glovebox. Outside the glovebox, the tube was charged sequentially with 1,4-dioxane,  $\text{H}_2\text{O}$ ,  $\text{Et}_3\text{N}$ , allyl donor **2**, tetradecane, and aldehyde **1** (1.0 equiv) *via* syringe. The tube was placed in a six-well autoclave that allows six separate reactions to be conducted at the same time. The autoclave was sealed and connected to a carbon monoxide gas cylinder. The autoclave was charged with CO gas (100 psi) and pressure was released to a vented hood four times before the CO gas was maintained at 40 psi and the valves for each cell were closed. The autoclave was mounted onto a magnetic stirrer with a temperature probe inserted into the metal block of the autoclave. The temperature was set at 75 °C and stirring was started. The temperature reached 75 °C within 30 min and was maintained for the indicated time. The autoclave was removed from the stirrer and chilled in an ice/water bath. The temperature reached ~20 °C within 40 min. The outlet was connected to a vented hood and the pressure in the autoclave was gently released. The inlet was then connected to a nitrogen line and the system was purged by  $\text{N}_2$  (which was passed through a drying tube filled with Drierite) for 15 min before the autoclave was opened.



**1. Catalytic Nucleophilic Allylation with 2-Methallyl Acetate. 1.1. Optimization of Catalyst. (Scheme S1)**

**Scheme S1**

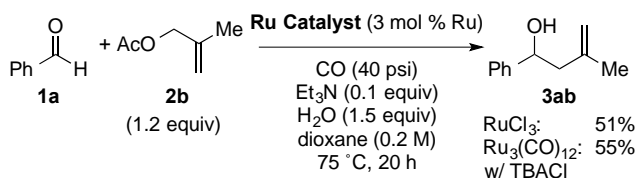

According to the General Procedure either RuCl<sub>3</sub>•xH<sub>2</sub>O or Ru<sub>3</sub>(CO)<sub>12</sub> (1 mol %) and TBACl (3 mol %) was combined with 1,4-dioxane (5.0 mL), H<sub>2</sub>O (27 μL, 1.5 mmol, 1.5 equiv), Et<sub>3</sub>N (14 μL, 0.10 mmol, 0.1 equiv), **2b** (158.0 μL, 137.0 mg, 1.2 mmol, 1.2 equiv), and **1a** (102 μL, 106 mg, 1.0 mmol, 1.0 equiv) and reacted for 20 h. Reaction contents transferred to a 20 mL glass scintillation vial and then concentrated in vacuo (20 – 23 °C, 10 mmHg). The crude product was purified by flash column chromatography (25 g SiO<sub>2</sub>, 2.0 cm column) RuCl<sub>3</sub>: Et<sub>2</sub>O:Hex (1:9, 400 mL then 1:4, 200 mL); Ru<sub>3</sub>(CO)<sub>12</sub>: Et<sub>2</sub>O:Hex (1:9, 200 mL then 1:3, 300 mL).

**1.2. Optimization of Leaving Group (Table S1).** According to the General Procedure  $\text{Ru}_3(\text{CO})_{12}$  (1 mol %), TBACl (3 mol %), 1,4-dioxane (1.0 mL),  $\text{H}_2\text{O}$  (10.8  $\mu\text{L}$ , 0.6 mmol, 1.5 equiv),  $\text{Et}_3\text{N}$  (5.6  $\mu\text{L}$ , 0.04 mmol, 0.1 equiv), allyl donor **2** (1.2 equiv), tetradecane (50  $\mu\text{L}$ , 0.192 mmol, 0.48 equiv), and **1a** (42.4 mg, 40.8  $\mu\text{L}$ , 0.40 mmol, 1.0 equiv) were combined and reacted for 20 h. A 30  $\mu\text{L}$  aliquot of the reaction mixture was passed through a plug of Fluorosil (ca. 1 cm) in Pasteur pipettes and washed with EtOAc (1.0 mL) into a fresh GC vial for analysis.

**Table S1. Effect of Nucleofuge on Methallyl Electrophile and **3ab** Conversion**

| $  \begin{array}{ccc}  \text{Ph}-\text{C}(=\text{O})-\text{H} & \xrightarrow[\text{CO (40 psi), Et}_3\text{N (0.1 equiv), H}_2\text{O (1.5 equiv), dioxane (0.4 M), 75 }^\circ\text{C, 20 h}]{\text{Methallyl Electrophile (1.2 equiv), Ru}_3(\text{CO})_{12} \text{ (1 mol\%), TBACl (3 mol\%)}} & \text{Ph}-\text{CH}(\text{OH})-\text{CH}=\text{CH}_2 \\  \textbf{1a} & & \textbf{3ab}  \end{array}  $ |                        |                                                                                |                                                  |                                        |
|-----------------------------------------------------------------------------------------------------------------------------------------------------------------------------------------------------------------------------------------------------------------------------------------------------------------------------------------------------------------------------------------------------------|------------------------|--------------------------------------------------------------------------------|--------------------------------------------------|----------------------------------------|
| Entry                                                                                                                                                                                                                                                                                                                                                                                                     | Methallyl Electrophile | $\text{p}K_{\text{a}}$ of Electrophile Conjugate Acid ( $\text{H}_2\text{O}$ ) | Methallyl Electrophile Recovery (%) <sup>c</sup> | <b>3ab</b> Conversion (%) <sup>c</sup> |
| 1                                                                                                                                                                                                                                                                                                                                                                                                         | <b>2c</b>              | 0.65                                                                           | 38                                               | 0                                      |
| 2                                                                                                                                                                                                                                                                                                                                                                                                         | <b>2d</b>              | 2.86                                                                           | 4                                                | 15                                     |
| 3                                                                                                                                                                                                                                                                                                                                                                                                         | <b>2e</b>              | 2.94                                                                           | 0                                                | 26                                     |
| 4                                                                                                                                                                                                                                                                                                                                                                                                         | <b>2f</b>              | 3.60 <sup>b</sup>                                                              | 11                                               | 55                                     |
| 5                                                                                                                                                                                                                                                                                                                                                                                                         | <b>2g</b>              | 4.20                                                                           | 0                                                | 38                                     |
| 6                                                                                                                                                                                                                                                                                                                                                                                                         | <b>2b</b>              | 4.76                                                                           | 6                                                | 60                                     |
| 7                                                                                                                                                                                                                                                                                                                                                                                                         | <b>2h</b>              | 6.35                                                                           | 0                                                | 27                                     |
| 8                                                                                                                                                                                                                                                                                                                                                                                                         | <b>2i</b>              | 8.18                                                                           | 18                                               | 60                                     |
| 9                                                                                                                                                                                                                                                                                                                                                                                                         | <b>2j</b>              | 8.74                                                                           | 21                                               | 51                                     |
| 10                                                                                                                                                                                                                                                                                                                                                                                                        | <b>2k</b>              | 9.95                                                                           | 87                                               | 9                                      |

<sup>a</sup> Determined by GC analysis using tetradecane as the internal standard. <sup>b</sup>  $\text{p}K_{\text{a}}$  value of carbonic acid

**1.3. Optimization of Reaction Conditions (Table S2).** According to the General Procedure According to the General Procedure,  $\text{Ru}_3(\text{CO})_{12}$  (1 or 2 mol %), TBACl (3 or 6 mol %), 1,4-dioxane (1.0 mL for 0.4 M or 2.0 mL for 0.2 M),  $\text{H}_2\text{O}$  (10.8  $\mu\text{L}$ , 0.6 mmol, 1.5 equiv),  $\text{Et}_3\text{N}$  (5.6  $\mu\text{L}$ , 0.04 mmol, 0.1 equiv), allyl donor **2b** (1.2, 1.4, 2.0, or 3.0 equiv), tetradecane (50  $\mu\text{L}$ , 0.192 mmol, 0.48 equiv), and **1a** (42.4 mg, 40.8  $\mu\text{L}$ , 0.40 mmol, 1.0 equiv) were combined and reacted for 20 or 40 h. A 30  $\mu\text{L}$  aliquot of the reaction mixture was passed through a plug of

Fluorosil (ca. 1 cm) in Pasteur pipettes and washed with EtOAc (1.0 mL) into a fresh GC vial for analysis.

**Table S2. Effect of 2b Equivalents, Catalyst Loading, and Time on Yield of 3ab**

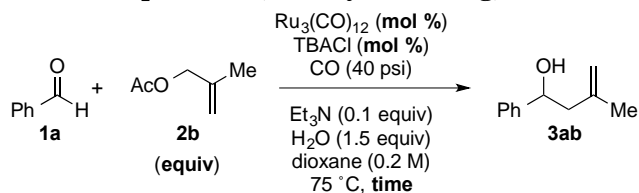

| entry | $\text{Ru}_3(\text{CO})_{12}$<br>mol % <sup>a</sup> | time<br>(h) | <b>2b</b><br>(equiv) | <b>2b</b><br>recovery<br>(%) <sup>b,c</sup> | <b>3ab</b><br>yield<br>(%) <sup>b</sup> |
|-------|-----------------------------------------------------|-------------|----------------------|---------------------------------------------|-----------------------------------------|
| 1     | 1                                                   | 20          | 1.2                  | 0                                           | 53                                      |
| 2     | 1                                                   | 20          | 2.0                  | 6                                           | 60                                      |
| 3     | 1                                                   | 40          | 1.4                  | 2                                           | 49                                      |
| 4     | 1                                                   | 40          | 2.0                  | 0                                           | 52                                      |
| 5     | 2                                                   | 20          | 1.2                  | 0                                           | 39                                      |
| 6     | 2                                                   | 20          | 2.0                  | 10                                          | 55                                      |
| 7     | 2                                                   | 20          | 3.0                  | 36                                          | 61                                      |
| 8     | 2                                                   | 40          | 2.0                  | 11                                          | 53                                      |

<sup>a</sup> TBACl loading 3 mol % w.r.t  $\text{Ru}_3(\text{CO})_{12}$ . <sup>b</sup> Determined by GC using tetradecane as the internal standard.

<sup>c</sup> Percentage recovered with respect to the total equiv of **2b**.

## 2. Catalytic Nucleophilic Allylation with *tert*-Butyl 2-(acetoxymethyl)acrylate. 2.1.

**Optimization of Catalyst Loading and Reaction Time (Table S3).** According to the General Procedure,  $\text{Ru}_3(\text{CO})_{12}$  (1 or 2 mol %), TBACl (3 or 6 mol %), 1,4-dioxane (2.0 mL),  $\text{H}_2\text{O}$  (10.8  $\mu\text{L}$ , 0.6 mmol, 1.5 equiv),  $\text{Et}_3\text{N}$  (5.6  $\mu\text{L}$ , 0.04 mmol, 0.1 equiv), allyl donor **2m** (1.2, 1.4, 1.5, or 1.6 equiv), tetradecane (50  $\mu\text{L}$ , 0.192 mmol, 0.48 equiv), and aldehyde **1** (0.40 mmol, 1.0 equiv) were combined and reacted for 20 or 36 h. A 30  $\mu\text{L}$  aliquot of the reaction mixture was passed through a plug of Fluorosil (ca. 1 cm) in Pasteur pipettes and washed with EtOAc (1.0 mL) into a fresh GC vial for analysis. The remainder of the solution was transferred to a 20-mL, glass scintillation vial with the aid of 3 mL of diethyl ether. The solvent was removed under reduced

pressure by rotary evaporation (25 °C, 20 mmHg). A  $^1\text{H}$  NMR sample (in  $\text{CDCl}_3$ ) was made of this concentrated reaction mixture and the relative ratios of product to aldehyde peaks (assumed mass balance) were integrated to determine the conversion of **1**.

**Table S3. Effect of  $\text{Ru}_3(\text{CO})_{12}$  Catalyst Loading and Reaction Time on Allylation with **2m****

| $  \begin{array}{c}  \text{R} \text{---} \text{C}(=\text{O})\text{H} + \text{AcO} \text{---} \text{CH}_2 \text{---} \text{C}(=\text{CH}_2) \text{---} \text{C}(=\text{O})\text{O}t\text{-Bu} \\  \mathbf{1} \qquad \qquad \mathbf{3m} \\  \text{(equiv)}  \end{array}  \xrightarrow[\substack{\text{CO (40 psi), Et}_3\text{N (0.1 equiv)} \\ \text{H}_2\text{O (1.5 equiv), dioxane (0.2 M)} \\ 75^\circ\text{C, time}}]{\text{Ru}_3(\text{CO})_{12} \text{ (mol \%), TBACl (mol \%)}}  \begin{array}{c}  \text{R} \text{---} \text{CH}(\text{OH}) \text{---} \text{CH}_2 \text{---} \text{C}(=\text{CH}_2) \text{---} \text{C}(=\text{O})\text{O}t\text{-Bu} \\  \mathbf{3xm}  \end{array}  $ |                                                                                     |                                                     |             |                      |                                         |                                        |
|-------------------------------------------------------------------------------------------------------------------------------------------------------------------------------------------------------------------------------------------------------------------------------------------------------------------------------------------------------------------------------------------------------------------------------------------------------------------------------------------------------------------------------------------------------------------------------------------------------------------------------------------------------------------------------------------------|-------------------------------------------------------------------------------------|-----------------------------------------------------|-------------|----------------------|-----------------------------------------|----------------------------------------|
| entry                                                                                                                                                                                                                                                                                                                                                                                                                                                                                                                                                                                                                                                                                           | product <b>3xm</b>                                                                  | $\text{Ru}_3(\text{CO})_{12}$<br>mol % <sup>a</sup> | time<br>(h) | <b>2m</b><br>(equiv) | <b>1</b> conversion<br>(%) <sup>b</sup> | <b>2m</b> recovery<br>(%) <sup>c</sup> |
| 1                                                                                                                                                                                                                                                                                                                                                                                                                                                                                                                                                                                                                                                                                               | 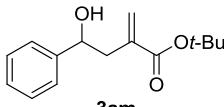   | 1                                                   | 20          | 1.6                  | 76                                      | 28                                     |
| 2                                                                                                                                                                                                                                                                                                                                                                                                                                                                                                                                                                                                                                                                                               | <b>3am</b>                                                                          | 2                                                   | 20          | 1.6                  | 99                                      | 14                                     |
| 3                                                                                                                                                                                                                                                                                                                                                                                                                                                                                                                                                                                                                                                                                               |    | 1                                                   | 36          | 1.2                  | 93                                      | 27                                     |
| 4                                                                                                                                                                                                                                                                                                                                                                                                                                                                                                                                                                                                                                                                                               | <b>3dm</b>                                                                          | 2                                                   | 20          | 1.2                  | 96                                      | 19                                     |
| 5                                                                                                                                                                                                                                                                                                                                                                                                                                                                                                                                                                                                                                                                                               |   | 1                                                   | 36          | 1.5                  | 91                                      | 1                                      |
| 6                                                                                                                                                                                                                                                                                                                                                                                                                                                                                                                                                                                                                                                                                               | <b>3fm</b>                                                                          | 2                                                   | 20          | 1.6                  | 96                                      | 25                                     |
| 7                                                                                                                                                                                                                                                                                                                                                                                                                                                                                                                                                                                                                                                                                               |  | 1                                                   | 20          | 1.4                  | 67                                      | 33                                     |
| 8                                                                                                                                                                                                                                                                                                                                                                                                                                                                                                                                                                                                                                                                                               | <b>3bm</b>                                                                          | 2                                                   | 20          | 1.4                  | 91                                      | 22                                     |
| 9                                                                                                                                                                                                                                                                                                                                                                                                                                                                                                                                                                                                                                                                                               |  | 1                                                   | 20          | 1.4                  | 79                                      | 21                                     |
| 10                                                                                                                                                                                                                                                                                                                                                                                                                                                                                                                                                                                                                                                                                              | <b>3jm</b>                                                                          | 2                                                   | 20          | 1.4                  | 91                                      | 22                                     |

<sup>a</sup> TBACl mol % = 3 equivalents w.r.t.  $\text{Ru}_3(\text{CO})_{12}$  <sup>b</sup> Determined via  $^1\text{H}$  NMR integration of aldehyde and product peaks. <sup>c</sup> Determined by GC analysis using tetradecane as the internal standard.

**2.2. Optimization of Concentration and Reaction Time (Table S4).** According to the General Procedure, Ru<sub>3</sub>(CO)<sub>12</sub> (1 mol %), TBACl (3 mol %), 1,4-dioxane (1.0 mL for 0.4 M or 2.0 mL for 0.2 M), H<sub>2</sub>O (10.8 μL, 0.6 mmol, 1.5 equiv), Et<sub>3</sub>N (5.6 μL, 0.04 mmol, 0.1 equiv), allyl donor **2m** (96.1 mg, 0.48 mmol, 1.2 equiv), tetradecane (50 μL, 0.192 mmol, 0.48 equiv), and aldehyde **1** (42.4 mg, 40.8 μL, 0.40 mmol, 1.0 equiv) were combined and reacted for 4, 12, or 16 h. A 30 μL aliquot of the reaction mixture was passed through a plug of Fluorosil (ca. 1 cm) in Pasteur pipettes and washed with EtOAc (1.0 mL) into a fresh GC vial for analysis.

**Table S4. Effect of Reaction Time and Concentration on Allylation with 2m.**

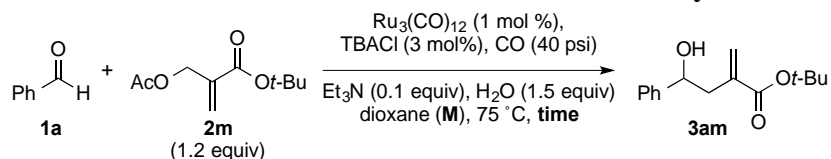

| entry | <b>1a</b><br>concentration | time<br>(h) | <b>1a</b> recovery<br>(%) <sup>a</sup> |
|-------|----------------------------|-------------|----------------------------------------|
| 1     | 0.2 M                      | 4           | 67                                     |
| 2     | 0.2 M                      | 12          | 28                                     |
| 3     | 0.2 M                      | 16          | 30                                     |
| 4     | 0.4 M                      | 4           | 28                                     |
| 5     | 0.4 M                      | 12          | 23                                     |
| 6     | 0.4 M                      | 16          | 23                                     |

<sup>a</sup> Determined by GC analysis using tetradecane as the internal standard

### 3. Catalytic Nucleophilic Allylation 2-Methylene-3-oxobutyl Acetate. 3.1.

**Optimization of Reaction Conditions (Table S5).** According to the General Procedure,  $\text{Ru}_3(\text{CO})_{12}$  (1 or 2 mol %), TBACl (3 or 6 mol %), 1,4-dioxane (1.0 mL),  $\text{H}_2\text{O}$  (10.8  $\mu\text{L}$ , 0.6 mmol, 1.5 equiv),  $\text{Et}_3\text{N}$  (5.6  $\mu\text{L}$ , 0.04 mmol, 0.1 equiv), allyl donor **2n** (1.2, 1.6, or 2.0 equiv), tetradecane (50  $\mu\text{L}$ , 0.192 mmol, 0.48 equiv), and aldehyde **1a** (42.4 mg, 40.8  $\mu\text{L}$ , 0.40 mmol, 1.0 equiv) were combined and reacted for 20 or 40 h. A 30  $\mu\text{L}$  aliquot of the reaction mixture was passed through a plug of Fluorosil (ca. 1 cm) in Pasteur pipettes and washed with EtOAc (1.0 mL) into a fresh GC vial for analysis.

**Table S5. Effect of Catalyst Loading, Reaction Time, and 2n Equivalents on Allylation of 1a.**

| $  \begin{array}{c}  \text{Ph}-\text{CHO} \quad \text{1a} + \text{AcO}-\text{CH}_2-\text{C}(\text{Me})=\text{CH}_2 \quad \text{2n} \\  \text{(equiv)}  \end{array}  \xrightarrow[  \begin{array}{c}  \text{Et}_3\text{N (0.1 equiv)} \\  \text{H}_2\text{O (1.5 equiv)} \\  \text{dioxane (0.4 M)} \\  75^\circ\text{C, time}  \end{array}  ]{  \begin{array}{c}  \text{Ru}_3(\text{CO})_{12} \text{ (mol \%)} \\  \text{TBACl (mol \%)} \\  \text{CO (40 psi)}  \end{array}  }  \begin{array}{c}  \text{Ph}-\text{CH}(\text{OH})-\text{CH}_2-\text{C}(\text{Me})=\text{CH}_2 \quad \text{3an}  \end{array}  $ |                                                     |             |                      |                                             |                                         |
|----------------------------------------------------------------------------------------------------------------------------------------------------------------------------------------------------------------------------------------------------------------------------------------------------------------------------------------------------------------------------------------------------------------------------------------------------------------------------------------------------------------------------------------------------------------------------------------------------------------|-----------------------------------------------------|-------------|----------------------|---------------------------------------------|-----------------------------------------|
| entry                                                                                                                                                                                                                                                                                                                                                                                                                                                                                                                                                                                                          | $\text{Ru}_3(\text{CO})_{12}$<br>mol % <sup>a</sup> | time<br>(h) | <b>2n</b><br>(equiv) | <b>2n</b><br>recovery<br>(%) <sup>b,c</sup> | <b>3an</b><br>yield<br>(%) <sup>b</sup> |
| 1                                                                                                                                                                                                                                                                                                                                                                                                                                                                                                                                                                                                              | 1                                                   | 20          | 1.2                  | 0                                           | 51                                      |
| 2                                                                                                                                                                                                                                                                                                                                                                                                                                                                                                                                                                                                              | 1                                                   | 20          | 1.6                  | 18                                          | 58                                      |
| 3                                                                                                                                                                                                                                                                                                                                                                                                                                                                                                                                                                                                              | 1                                                   | 20          | 2.0                  | 28                                          | 73                                      |
| 4                                                                                                                                                                                                                                                                                                                                                                                                                                                                                                                                                                                                              | 1                                                   | 40          | 2.0                  | 24                                          | 71                                      |
| 5                                                                                                                                                                                                                                                                                                                                                                                                                                                                                                                                                                                                              | 2                                                   | 20          | 2.0                  | 23                                          | 94                                      |

<sup>a</sup> TBACl loading 3 mol % w.r.t  $\text{Ru}_3(\text{CO})_{12}$ . <sup>b</sup> Determined by GC analysis using tetradecane as the internal standard. <sup>c</sup> Percentage recovered is with respect to the total equiv of **2n**



#### 4. Catalytic Nucleophilic Allylation 2-Phenylallyl Acetate. 4.1. Reaction

**Optimization (Table S7).** According to the General Procedure,  $\text{Ru}_3(\text{CO})_{12}$  (1 or 2 mol %), TBACl (3 or 6 mol %), 1,4-dioxane (1.0 mL for 0.4 M or 2.0 mL for 0.2 M),  $\text{H}_2\text{O}$  (10.8  $\mu\text{L}$ , 0.6 mmol, 1.5 equiv),  $\text{Et}_3\text{N}$  (5.6  $\mu\text{L}$ , 0.04 mmol, 0.1 equiv), allyl donor **2o** (1.2, 1.5, or 1.8 equiv), tetradecane (50  $\mu\text{L}$ , 0.192 mmol, 0.48 equiv), and aldehyde **1a** (42.4 mg, 40.8  $\mu\text{L}$ , 0.40 mmol, 1.0 equiv) were combined and reacted for 20 or 40 h. A 30  $\mu\text{L}$  aliquot of the reaction mixture was passed through a plug of Fluorosil (ca. 1 cm) in Pasteur pipettes and washed with EtOAc (1.0 mL) into a fresh GC vial for analysis.

**Table 7. Effect of Concentration, Time, Catalyst, and 2o Loading on the Allylation of 1a**

| $  \begin{array}{c}  \text{Ph}-\text{CHO} \quad + \quad \text{AcO}-\text{CH}_2-\text{CH}=\text{CH}-\text{Ph} \\  \textbf{1a} \quad \quad \quad \textbf{2o} \\  \quad \quad \quad \text{(equiv)}  \end{array}  \xrightarrow[\text{CO (40 psi), Et}_3\text{N (0.1 equiv)}]{\text{Ru}_3(\text{CO})_{12} \text{ (mol \%), TBACl (mol \%)} }  \begin{array}{c}  \text{Ph}-\text{CH}(\text{OH})-\text{CH}_2-\text{CH}=\text{CH}-\text{Ph} \\  \textbf{3ao}  \end{array}  $ <p style="text-align: center;"> <math>\text{H}_2\text{O}</math> (1.5 equiv), dioxane (M)<br/> 75 °C, time </p> |                                                     |                            |             |                      |                                           |                                             |
|-------------------------------------------------------------------------------------------------------------------------------------------------------------------------------------------------------------------------------------------------------------------------------------------------------------------------------------------------------------------------------------------------------------------------------------------------------------------------------------------------------------------------------------------------------------------------------------|-----------------------------------------------------|----------------------------|-------------|----------------------|-------------------------------------------|---------------------------------------------|
| entry                                                                                                                                                                                                                                                                                                                                                                                                                                                                                                                                                                               | $\text{Ru}_3(\text{CO})_{12}$<br>mol % <sup>a</sup> | <b>1a</b><br>concentration | time<br>(h) | <b>2o</b><br>(equiv) | <b>1a</b><br>recovery<br>(%) <sup>b</sup> | <b>2o</b><br>recovery<br>(%) <sup>b,c</sup> |
| 1                                                                                                                                                                                                                                                                                                                                                                                                                                                                                                                                                                                   | 1                                                   | 0.2 M                      | 20          | 1.2                  | 47                                        | 0                                           |
| 2                                                                                                                                                                                                                                                                                                                                                                                                                                                                                                                                                                                   | 1                                                   | 0.2 M                      | 40          | 1.5                  | 25                                        | 0                                           |
| 3                                                                                                                                                                                                                                                                                                                                                                                                                                                                                                                                                                                   | 1                                                   | 0.4 M                      | 40          | 1.5                  | 18                                        | 1                                           |
| 4                                                                                                                                                                                                                                                                                                                                                                                                                                                                                                                                                                                   | 2                                                   | 0.4 M                      | 20          | 1.8                  | 23                                        | 26                                          |

<sup>a</sup> TBACl loading 3 mol % w.r.t  $\text{Ru}_3(\text{CO})_{12}$ . <sup>b</sup> Determined by GC analysis using tetradecane as the internal standard. <sup>c</sup> Percentage recovered is with respect to the total equiv of **2o** added.



**4.2. Optimization of Water Loading (Table S8).** According to the General Procedure  $\text{Ru}_3(\text{CO})_{12}$  (3 mol %), TBACl (9 mol %), 1,4-dioxane (1.0 mL),  $\text{H}_2\text{O}$  (2.0, 2.5, 3.0, or 3.5 equiv),  $\text{Et}_3\text{N}$  (5.6  $\mu\text{L}$ , 0.04 mmol, 0.1 equiv), allyl donor **2o** (2.4 or 2.8 equiv), tetradecane (50  $\mu\text{L}$ , 0.192 mmol, 0.48 equiv), and aldehyde **1** (0.40 mmol, 1.0 equiv) were combined and reacted for 24 or 48 h. A 30  $\mu\text{L}$  aliquot of the reaction mixture was passed through a plug of Fluorosil (ca. 1 cm) in Pasteur pipettes and washed with EtOAc (1.0 mL) into a fresh GC vial for analysis.

**Table 8. Effect of Time and  $\text{H}_2\text{O}$  and **2o** Loading on Allylation of **1****

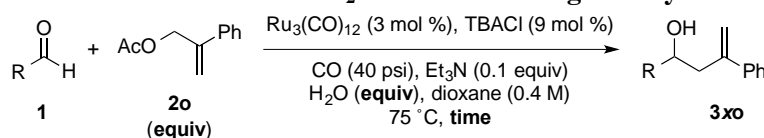

| entry | product <b>3xo</b> | $\text{H}_2\text{O}$<br>(equiv) | <b>2o</b><br>(equiv) | time<br>(h) | <b>1</b> recovery<br>(%) <sup>a</sup> | <b>2o</b> recovery<br>(%) <sup>a,b</sup> |
|-------|--------------------|---------------------------------|----------------------|-------------|---------------------------------------|------------------------------------------|
| 1     |                    | 2.0                             | 2.8                  | 24          | 16                                    | 40                                       |
| 2     |                    | 2.0                             | 2.8                  | 48          | 17                                    | 37                                       |
| 3     |                    | 2.5                             | 2.8                  | 24          | 12                                    | 11                                       |
| 4     |                    | 2.5                             | 2.8                  | 48          | 11                                    | 7                                        |
| 5     |                    | 3.0                             | 2.4                  | 24          | 17                                    | 0                                        |
| 6     |                    | 3.5                             | 2.4                  | 24          | 19                                    | 1                                        |
| 7     |                    | 2.5                             | 2.8                  | 24          | 22                                    | 12                                       |
| 8     |                    | 3.5                             | 2.4                  | 24          | 18                                    | 0                                        |
| 9     |                    | 3.5                             | 2.8                  | 24          | 22                                    | 0                                        |
| 10    |                    | 3.5                             | 2.8                  | 48          | 18                                    | 0                                        |

<sup>a</sup> Determined by GC analysis using tetradecane as the internal standard.

<sup>b</sup> Percentage recovered is with respect to the total equiv of **2o** added.

## References

- (1) Işeri, R.; Küsefoğlu, S. H. *J. Appl. Polym. Sci.* **2000**, *77*, 509-516.
- (2) Smith, A. B.; Levenberg, P. A.; Jerris, P. J.; Scarborough, R. M.; Wovkulich, P. M. *J. Am. Chem. Soc.* **1981**, *103*, 1501-1513.
- (3) Moorlag, H.; de Vries, J. G.; Kaptein, B.; Schoemaker, H. E.; Kamphuis, J.; Kellogg, R. *M. Recl. Trav. Chim. Pays-Bas* **1992**, *111*, 129-137.
- (4) Ramachandran, P. V.; Burghardt, T. E.; Bland-Berry, L. *J. Org. Chem.* **2005**, *70*, 7911-7918.
- (5) Takagi, R.; Miwa, Y.; Nerio, T.; Inoue, Y.; Matsumura, S.; Ohkata, K. *Org. Biomol. Chem.* **2007**, *5*, 286-300.
- (6) Newman-Evans, R. H.; Simon, R. J.; Carpenter, B. K. *J. Org. Chem* **1990**, *55*, 695-711.
- (7) Hoang, G. T.; Reddy, V. J.; Nguyen, H. H. K.; Douglas, C. J. *Angew. Chem., Int. Ed.* **2011**, *50*, 1882-1884.
- (8) Yamazaki, S.; Fujinami, K.; Maitoko, Y.; Ueda, K.; Kakiuchi, K. *J. Org. Chem.* **2013**, *78*, 8405-8416.
- (9) Nagashima, H.; Seki, K.; Ozaki, N.; Wakamatsu, H.; Itoh, K.; Tomo, Y.; Tsuji, J. *J. Org. Chem* **1990**, *55*, 985.

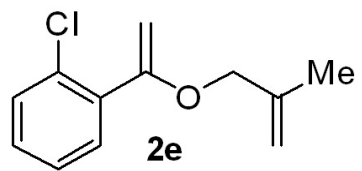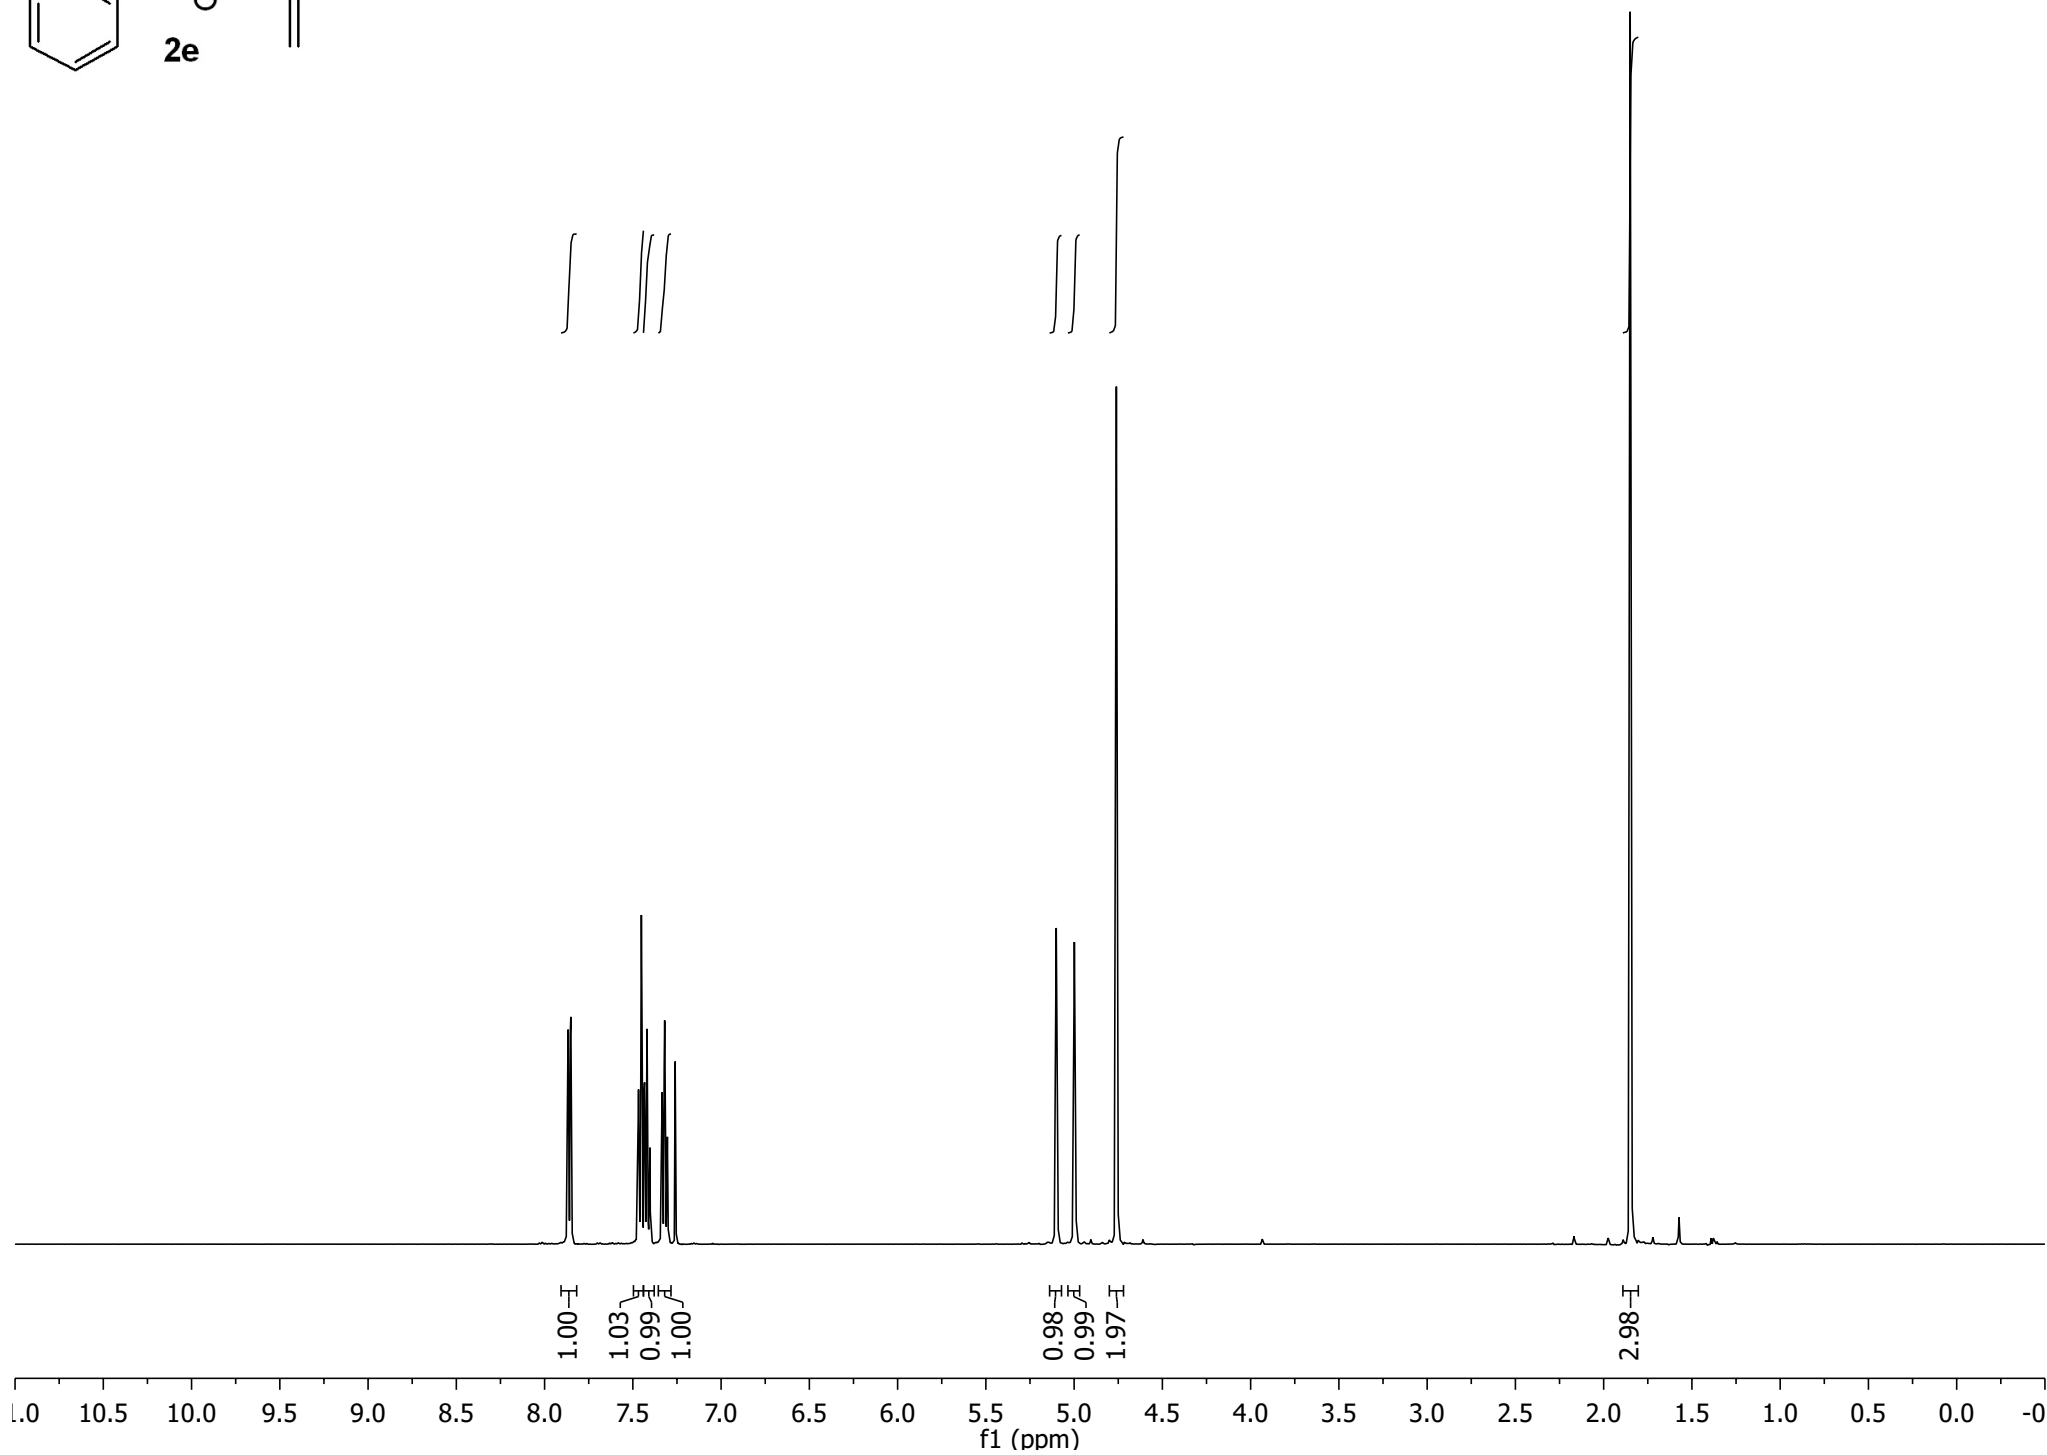

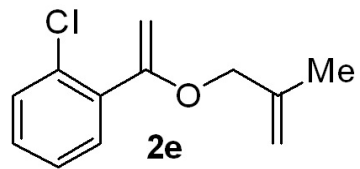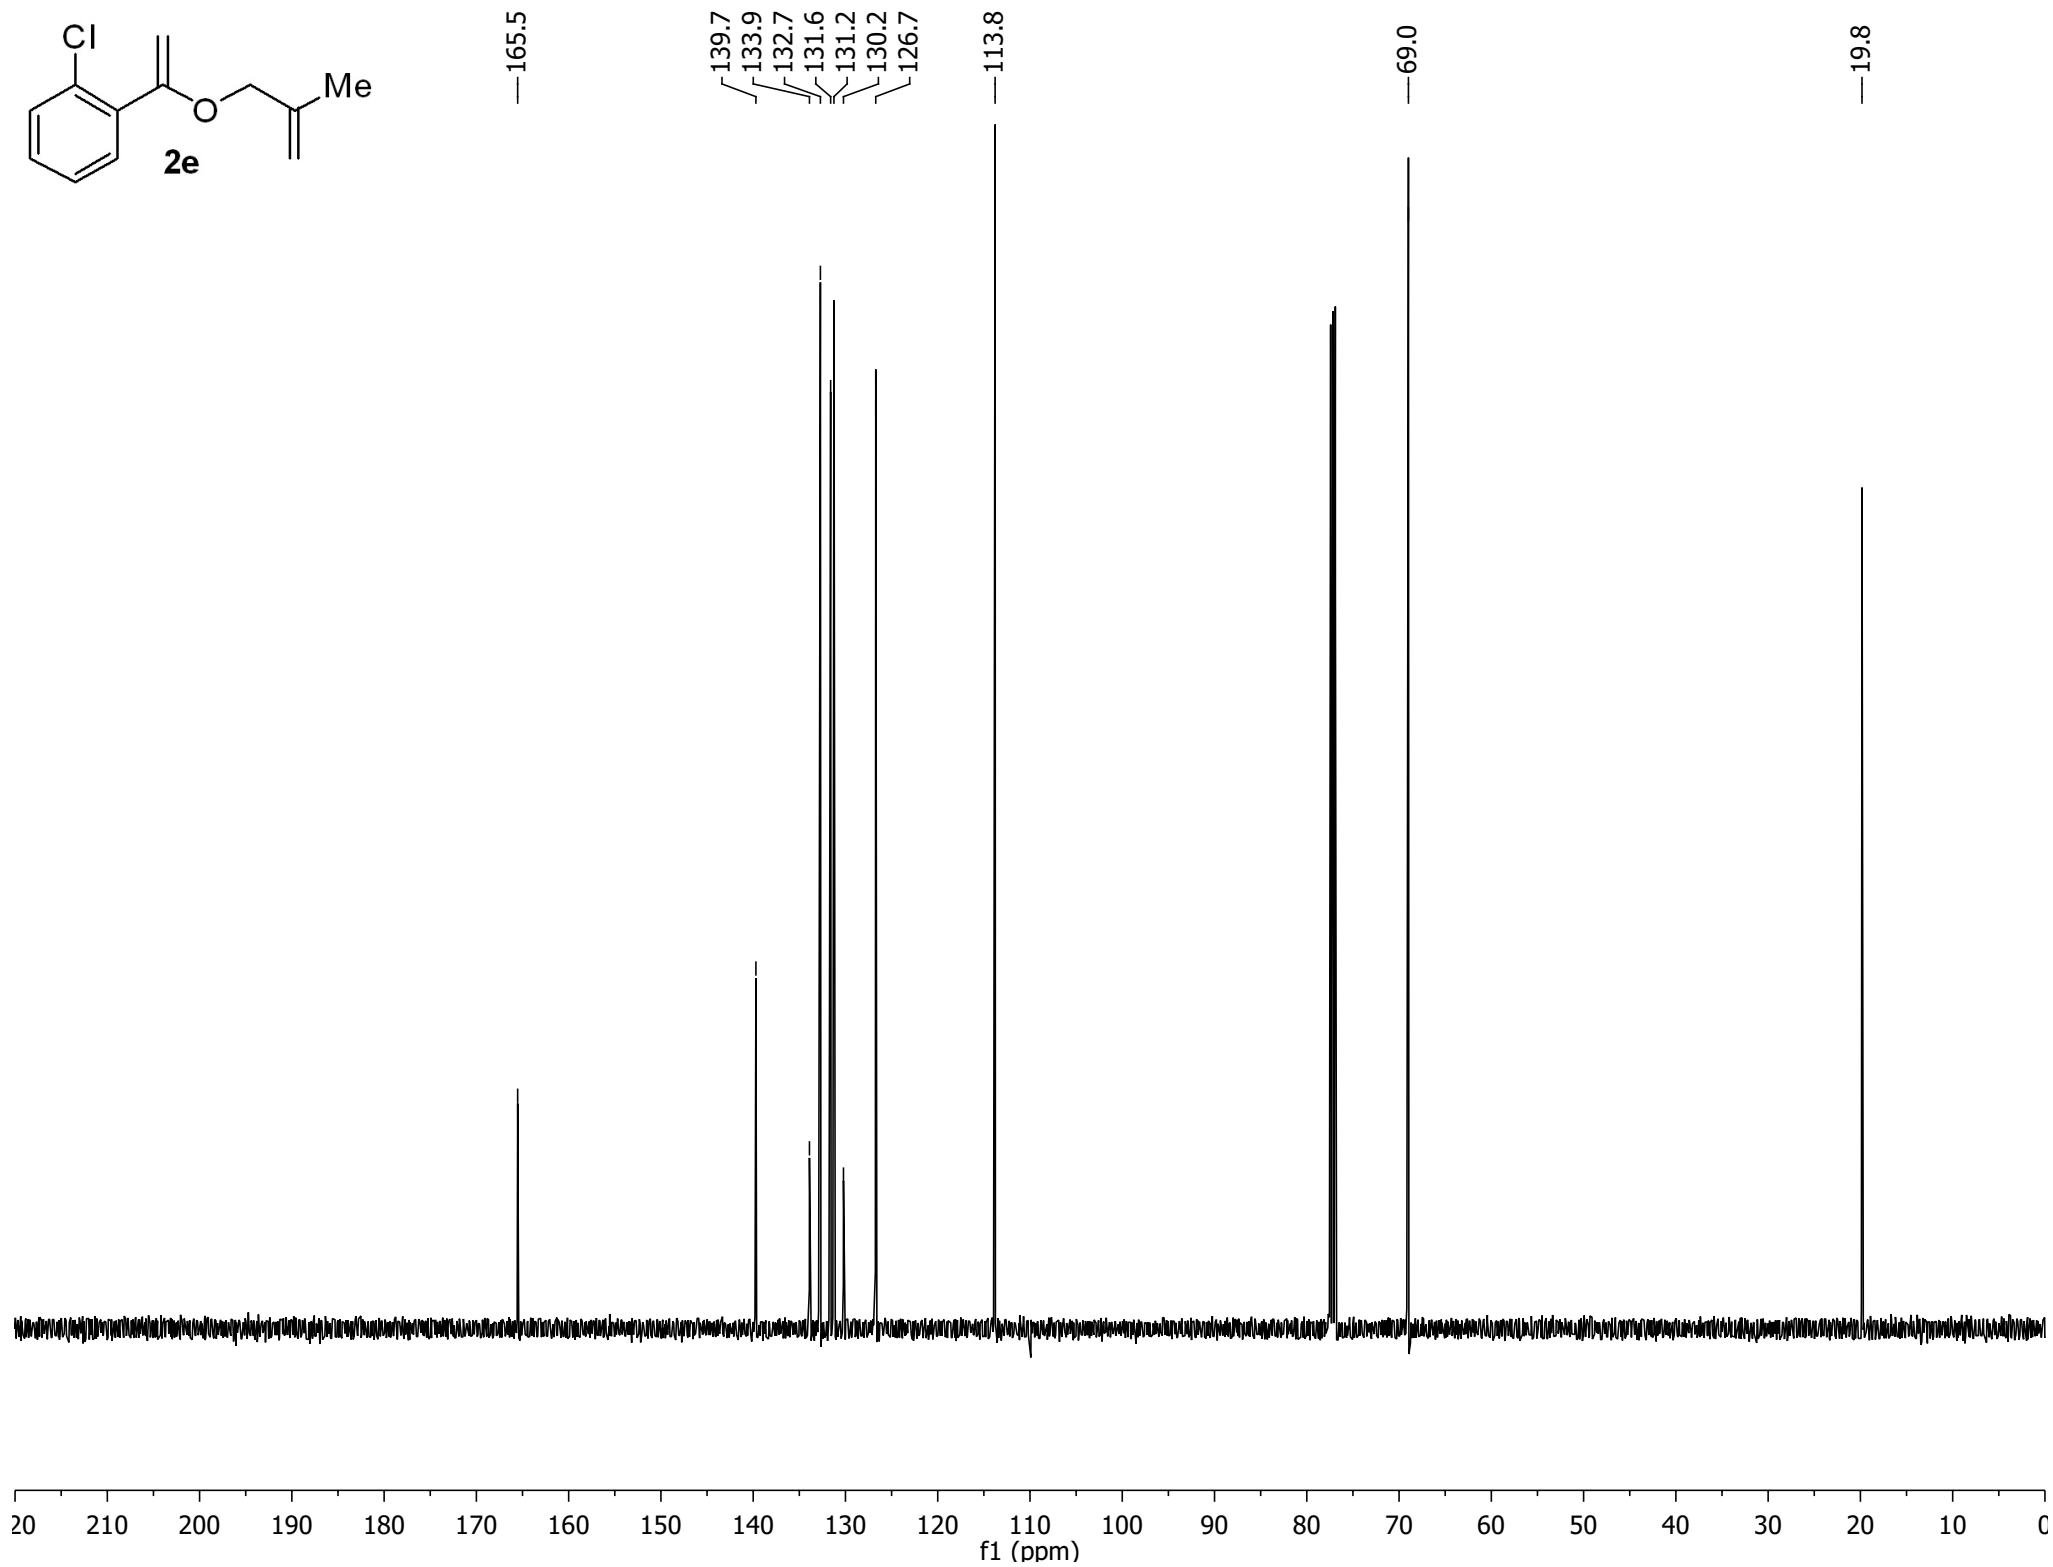

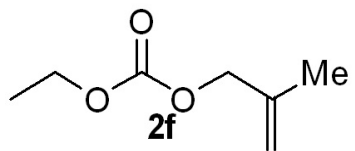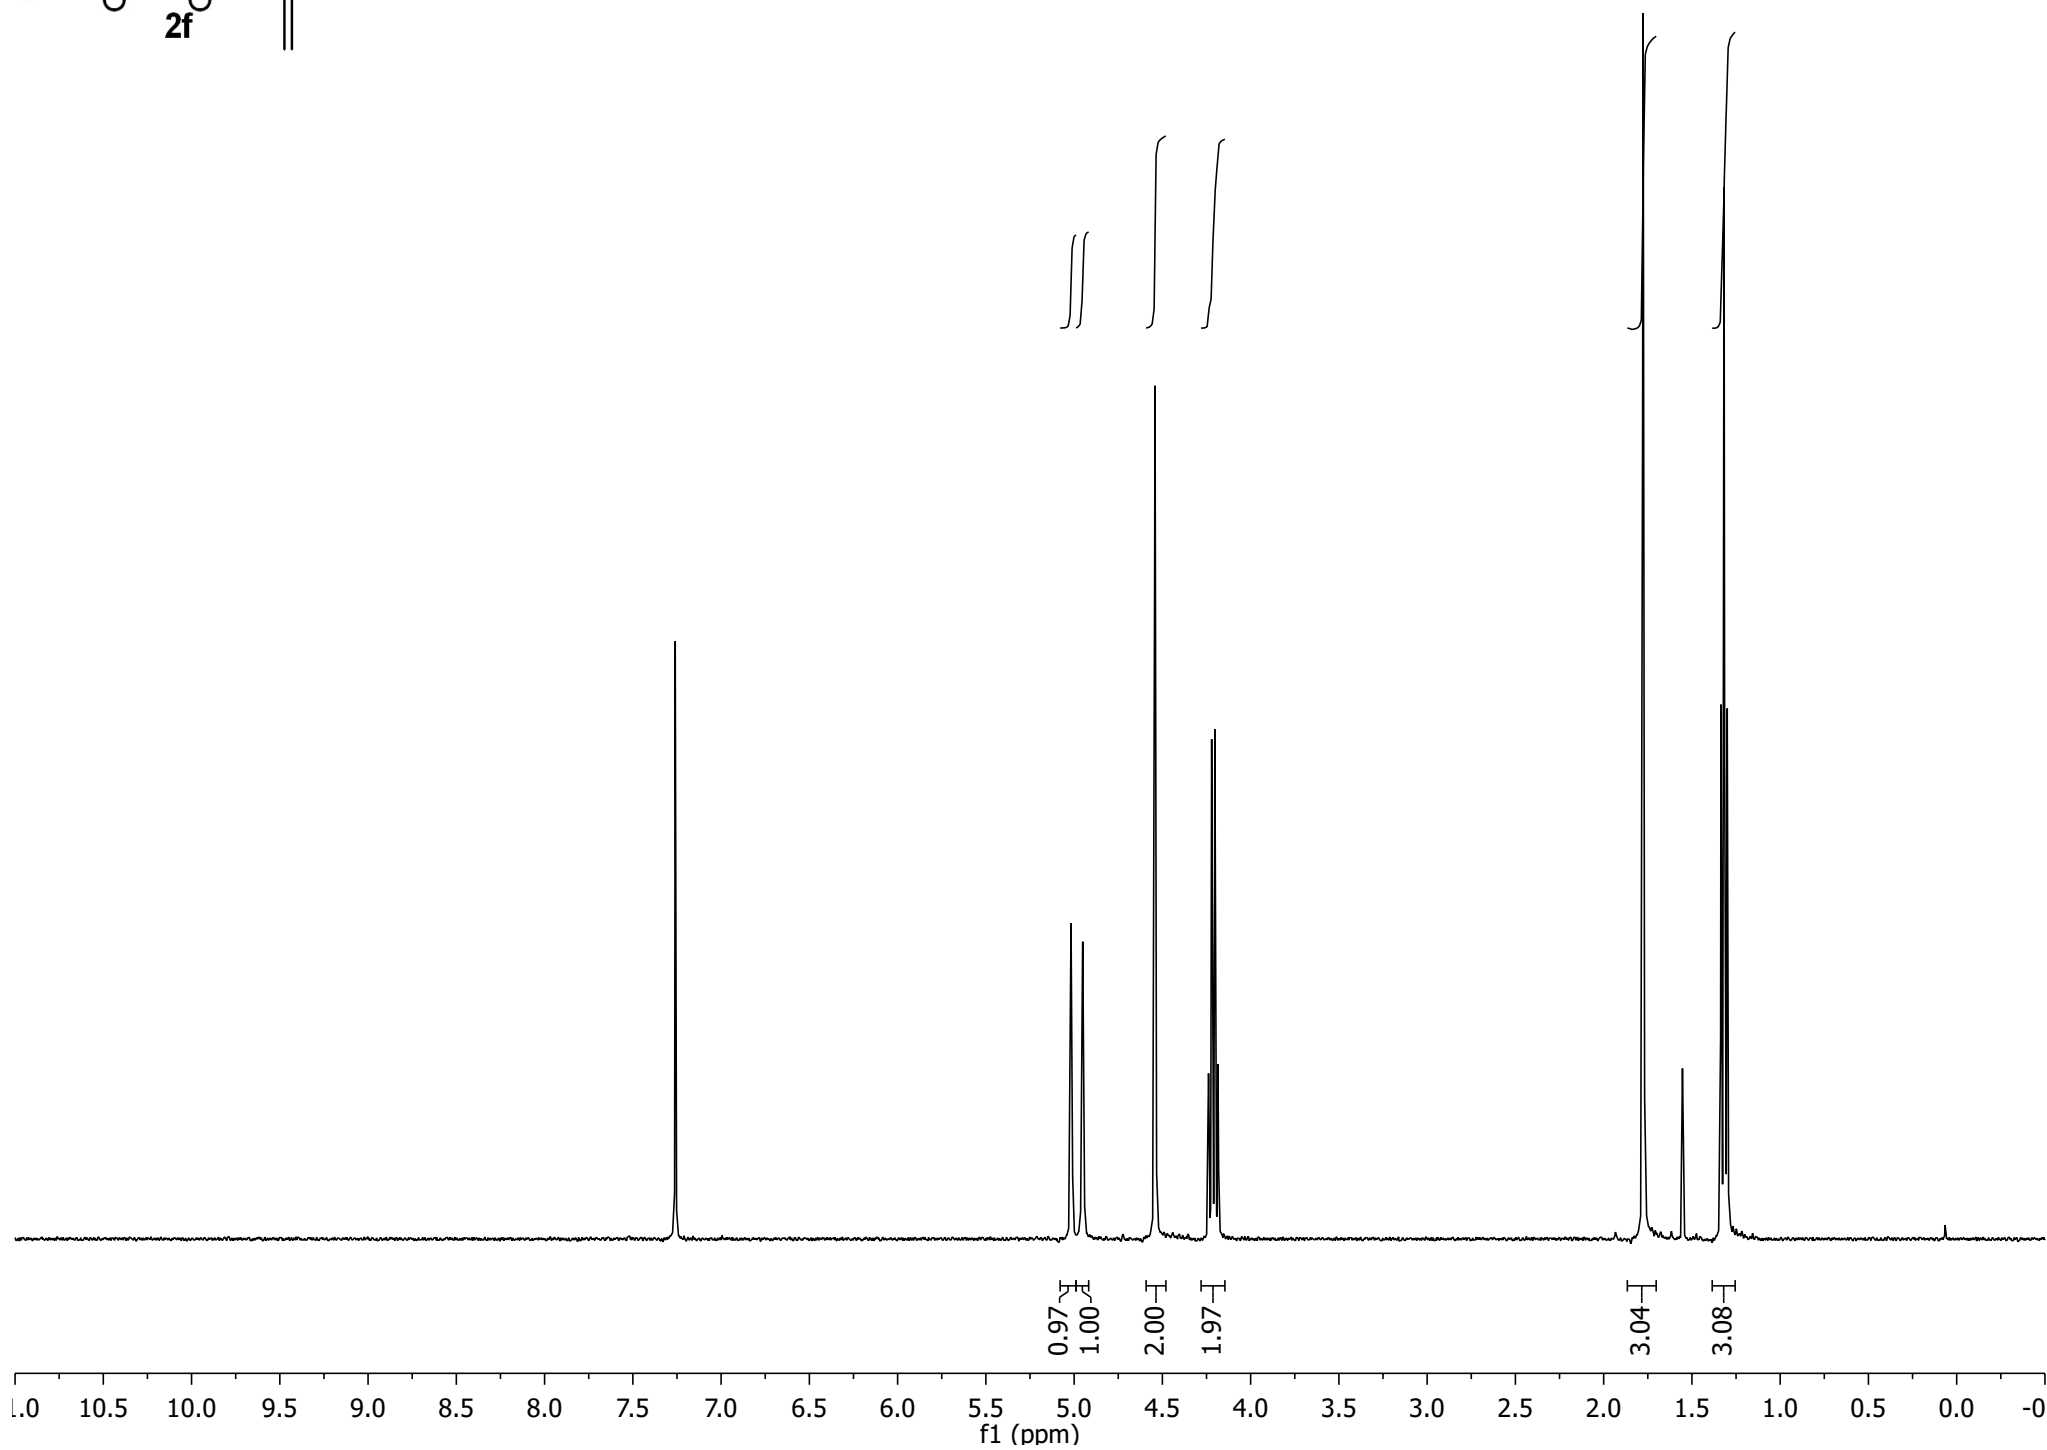

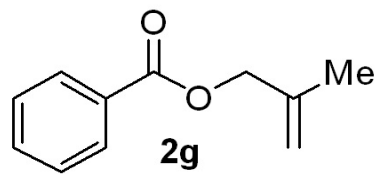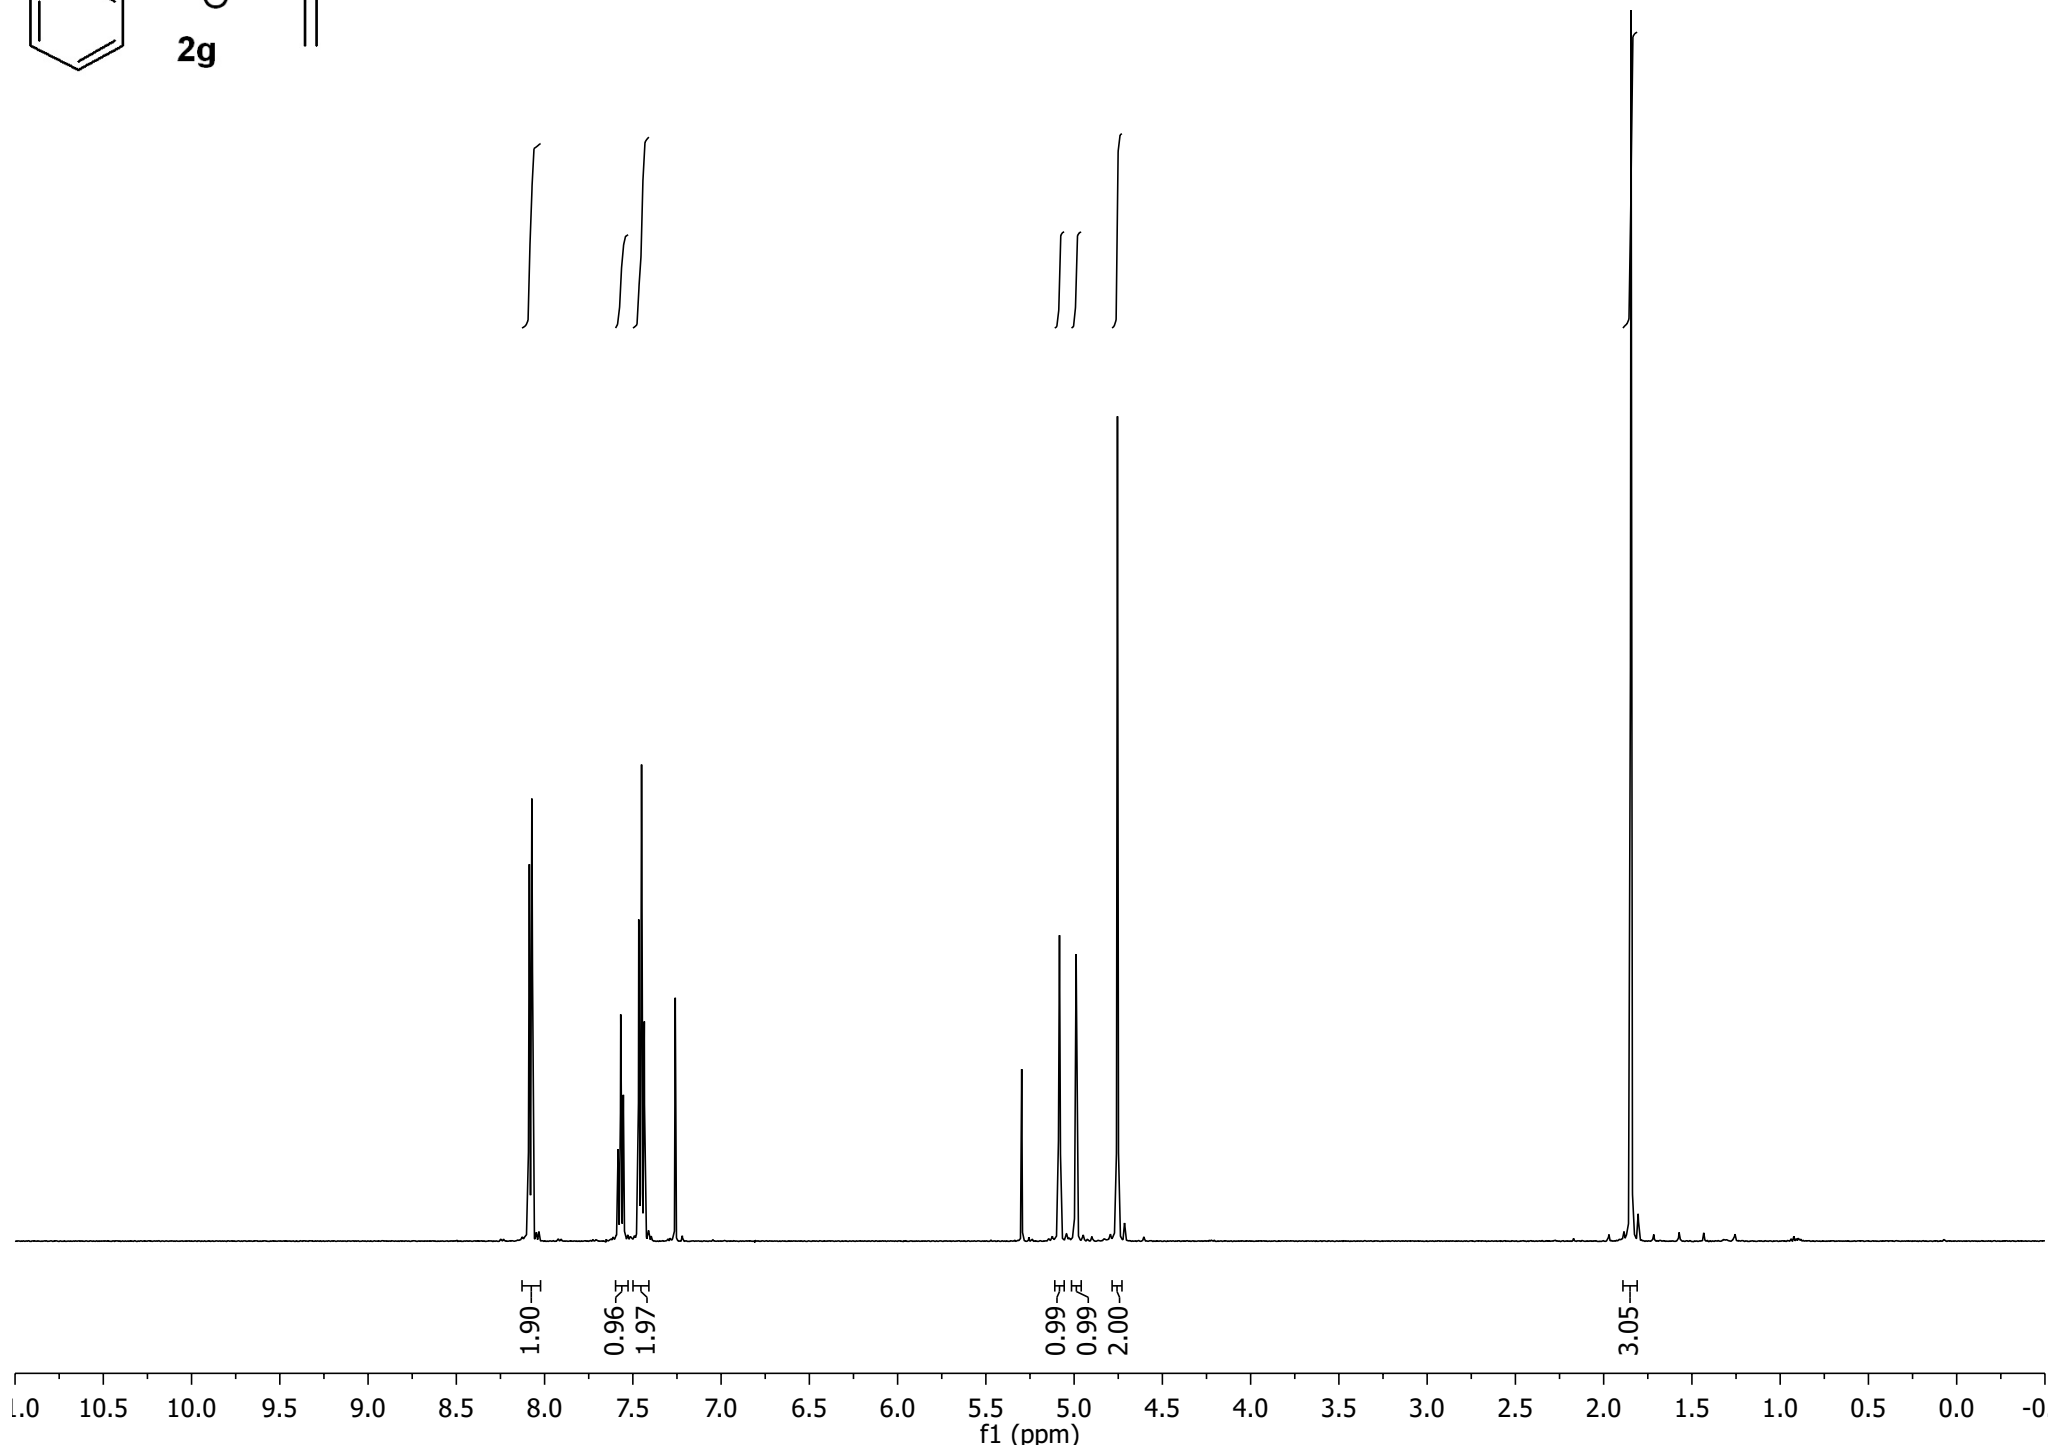

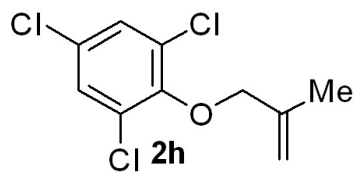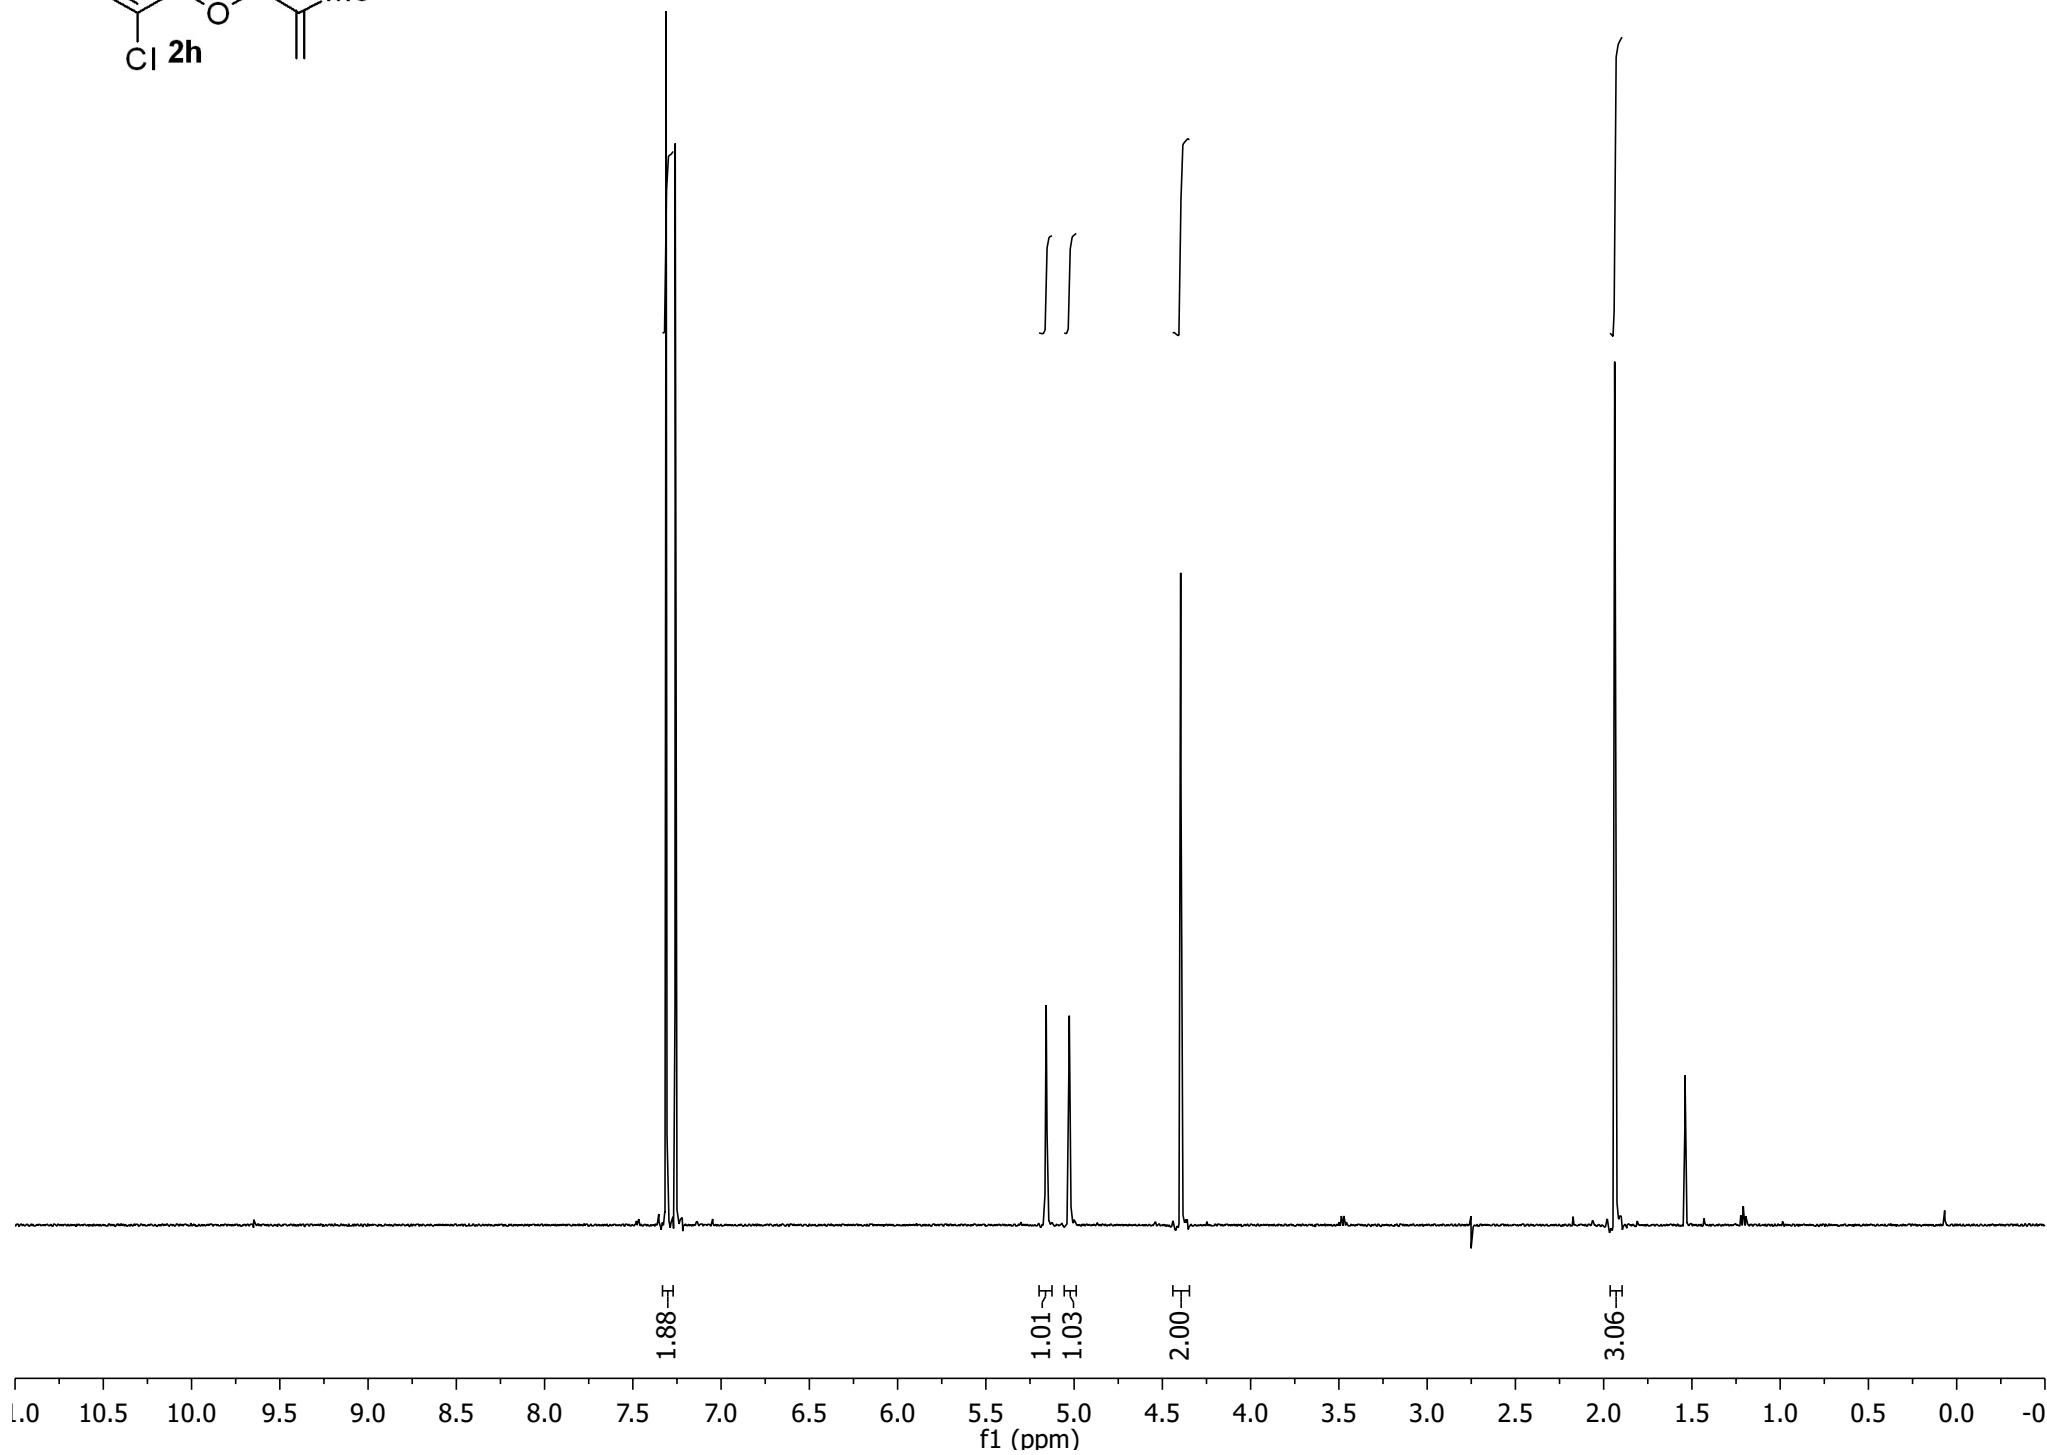

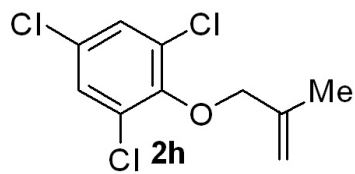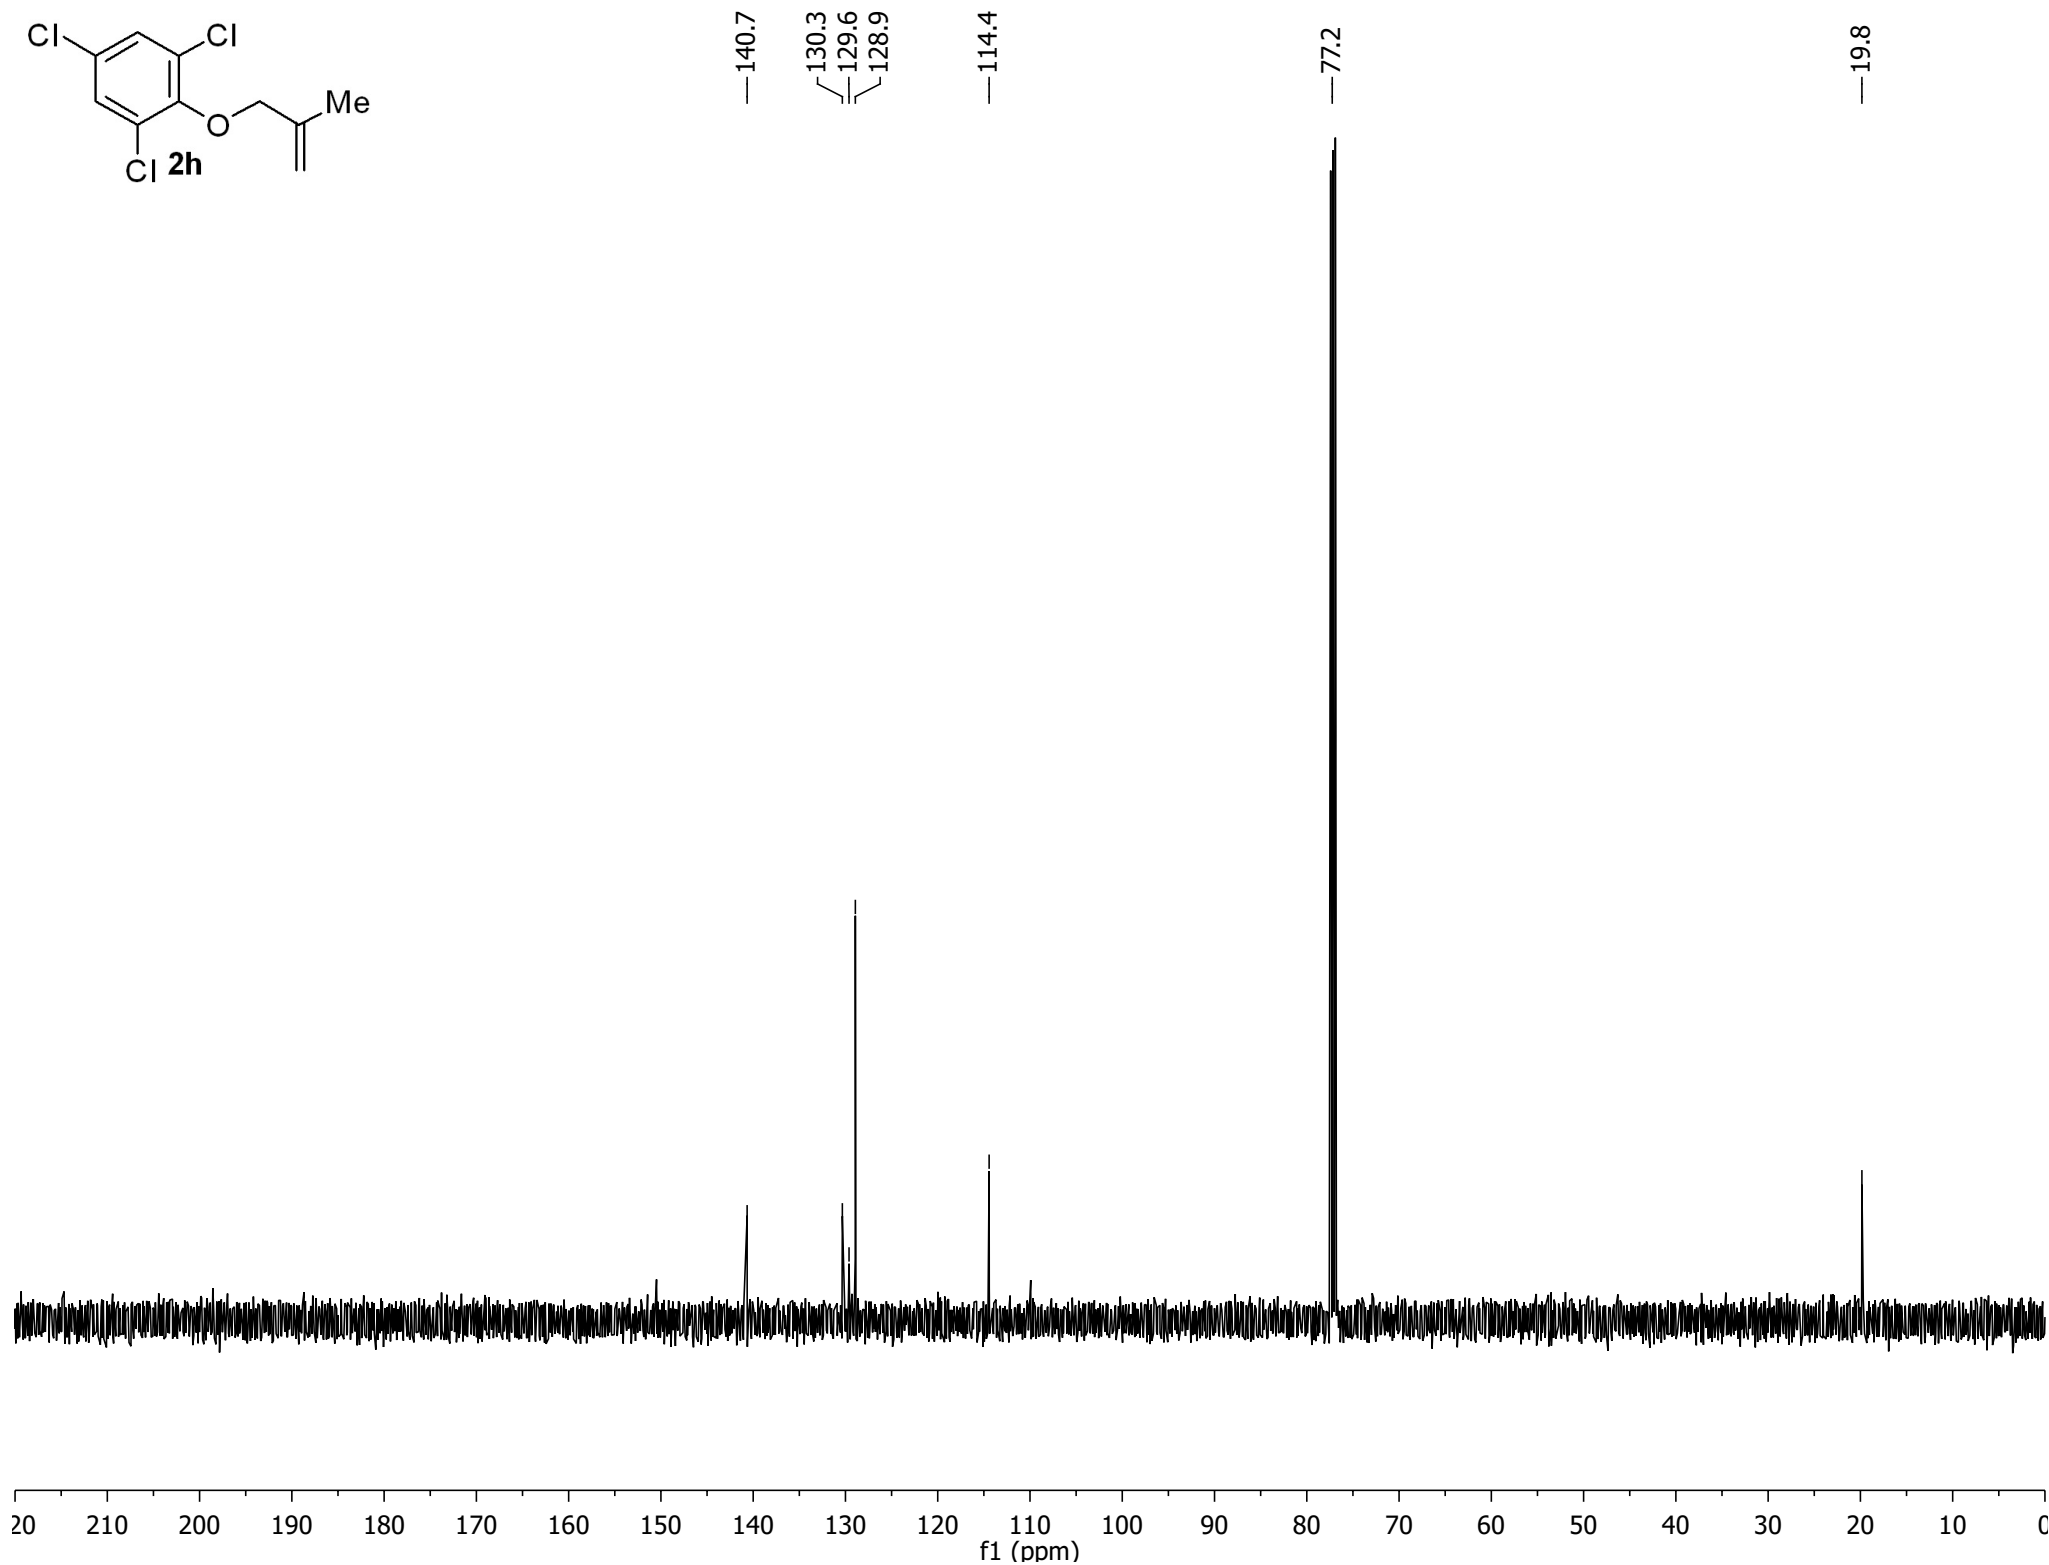



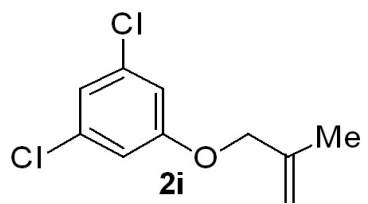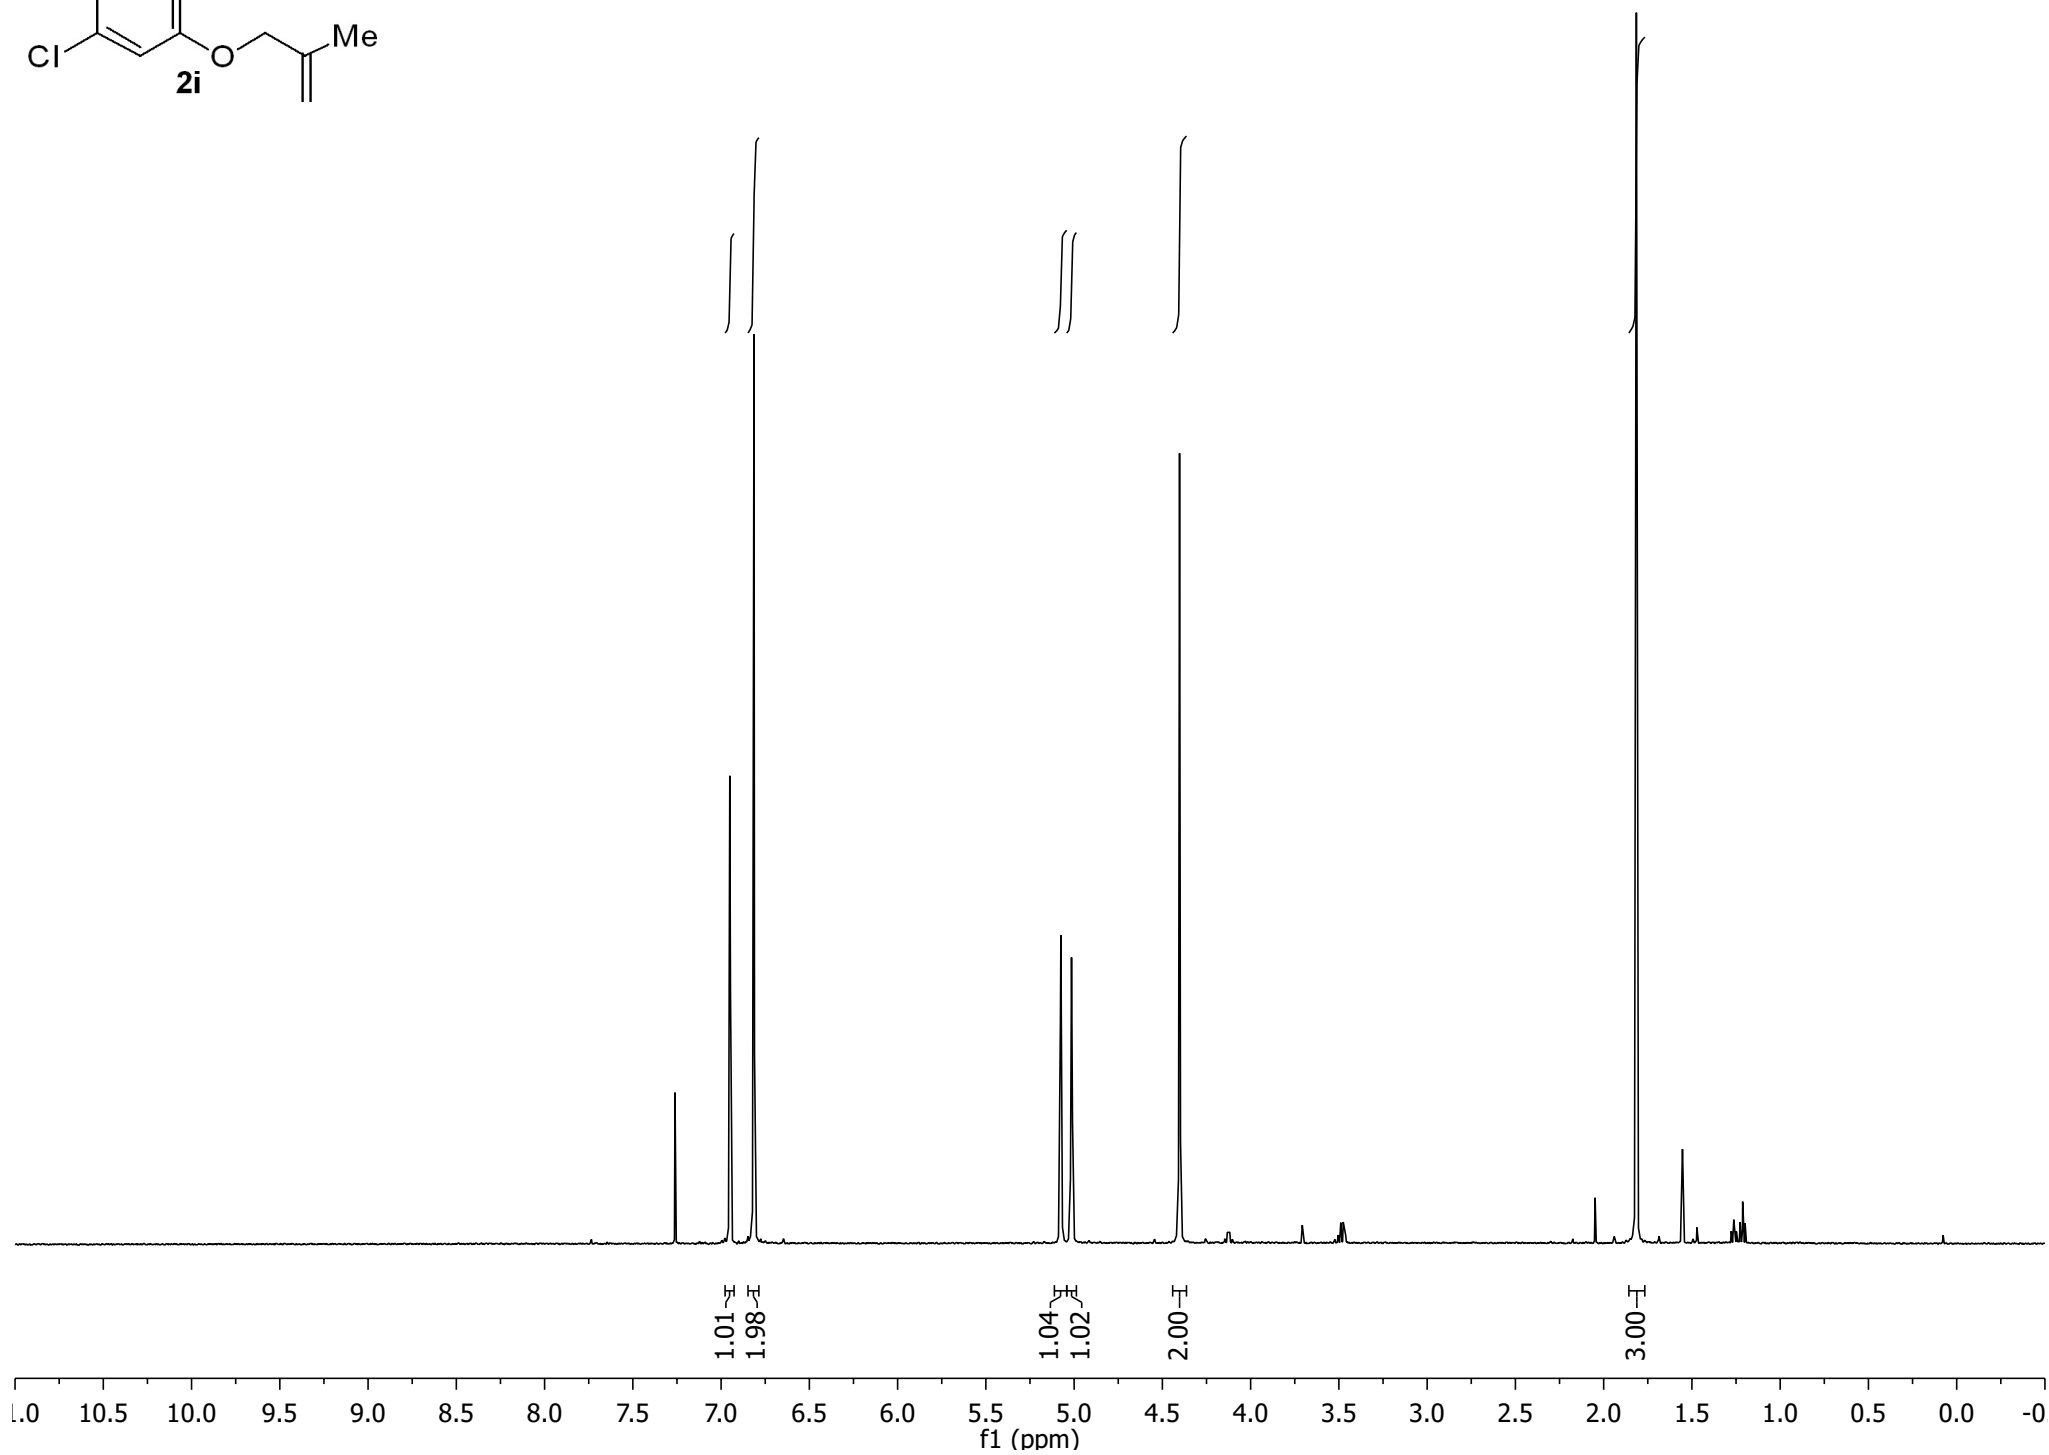

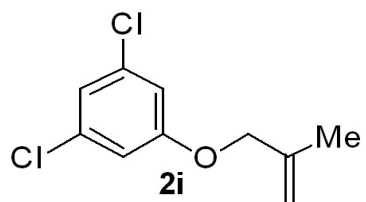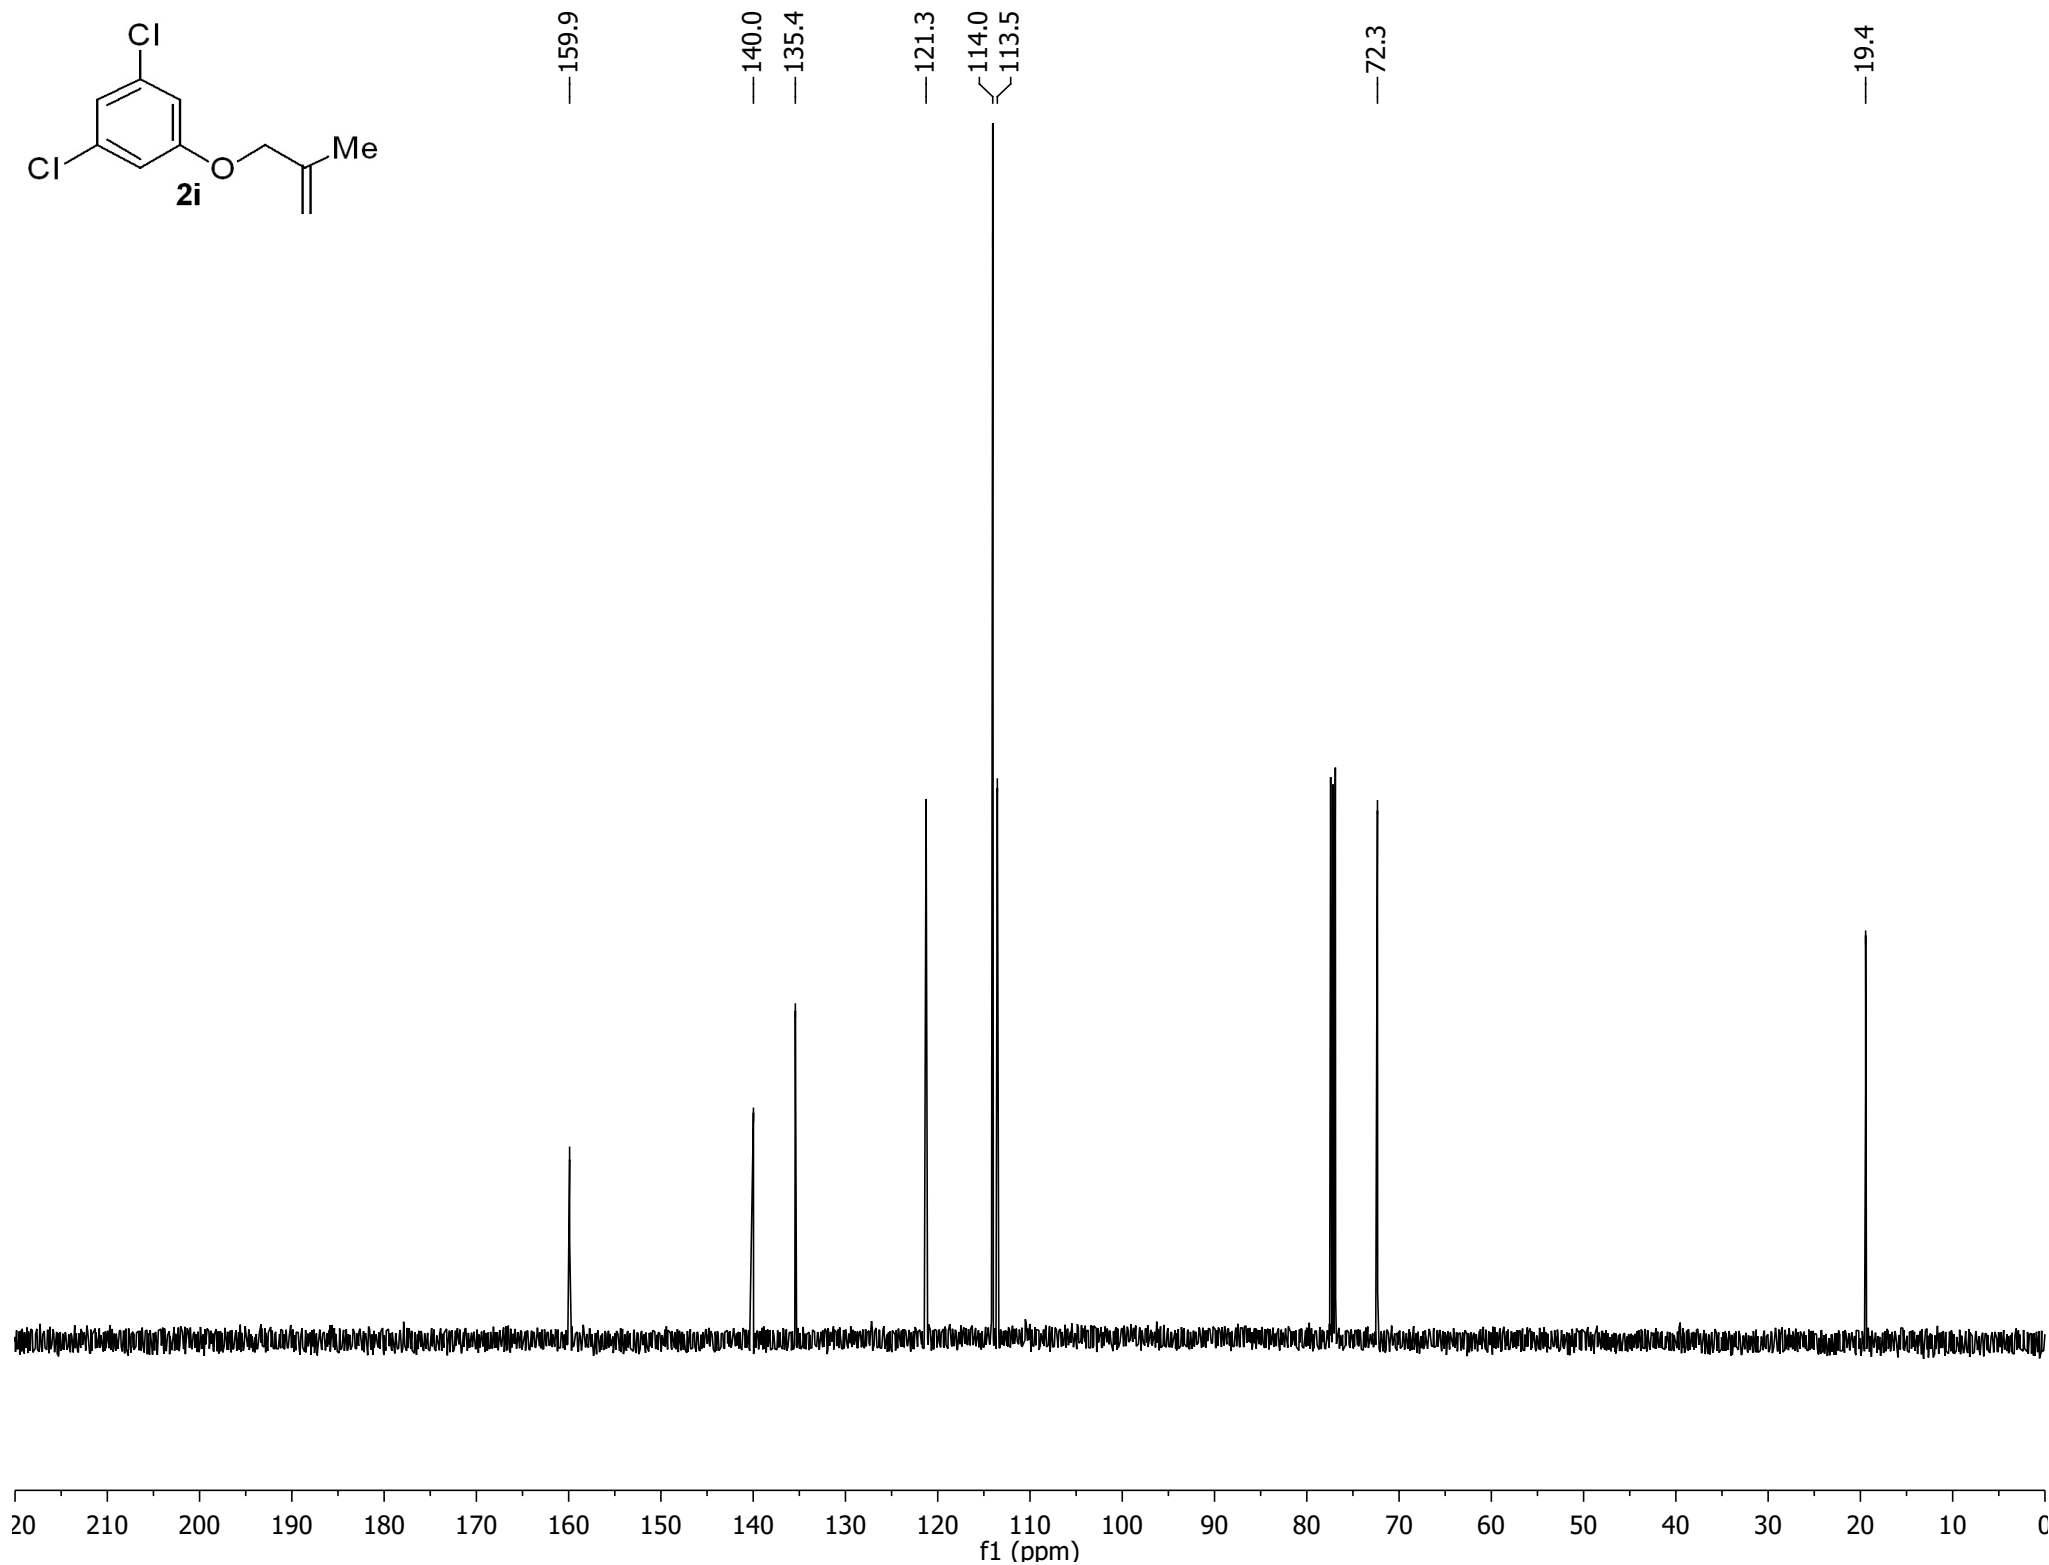

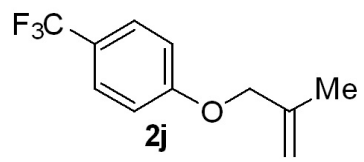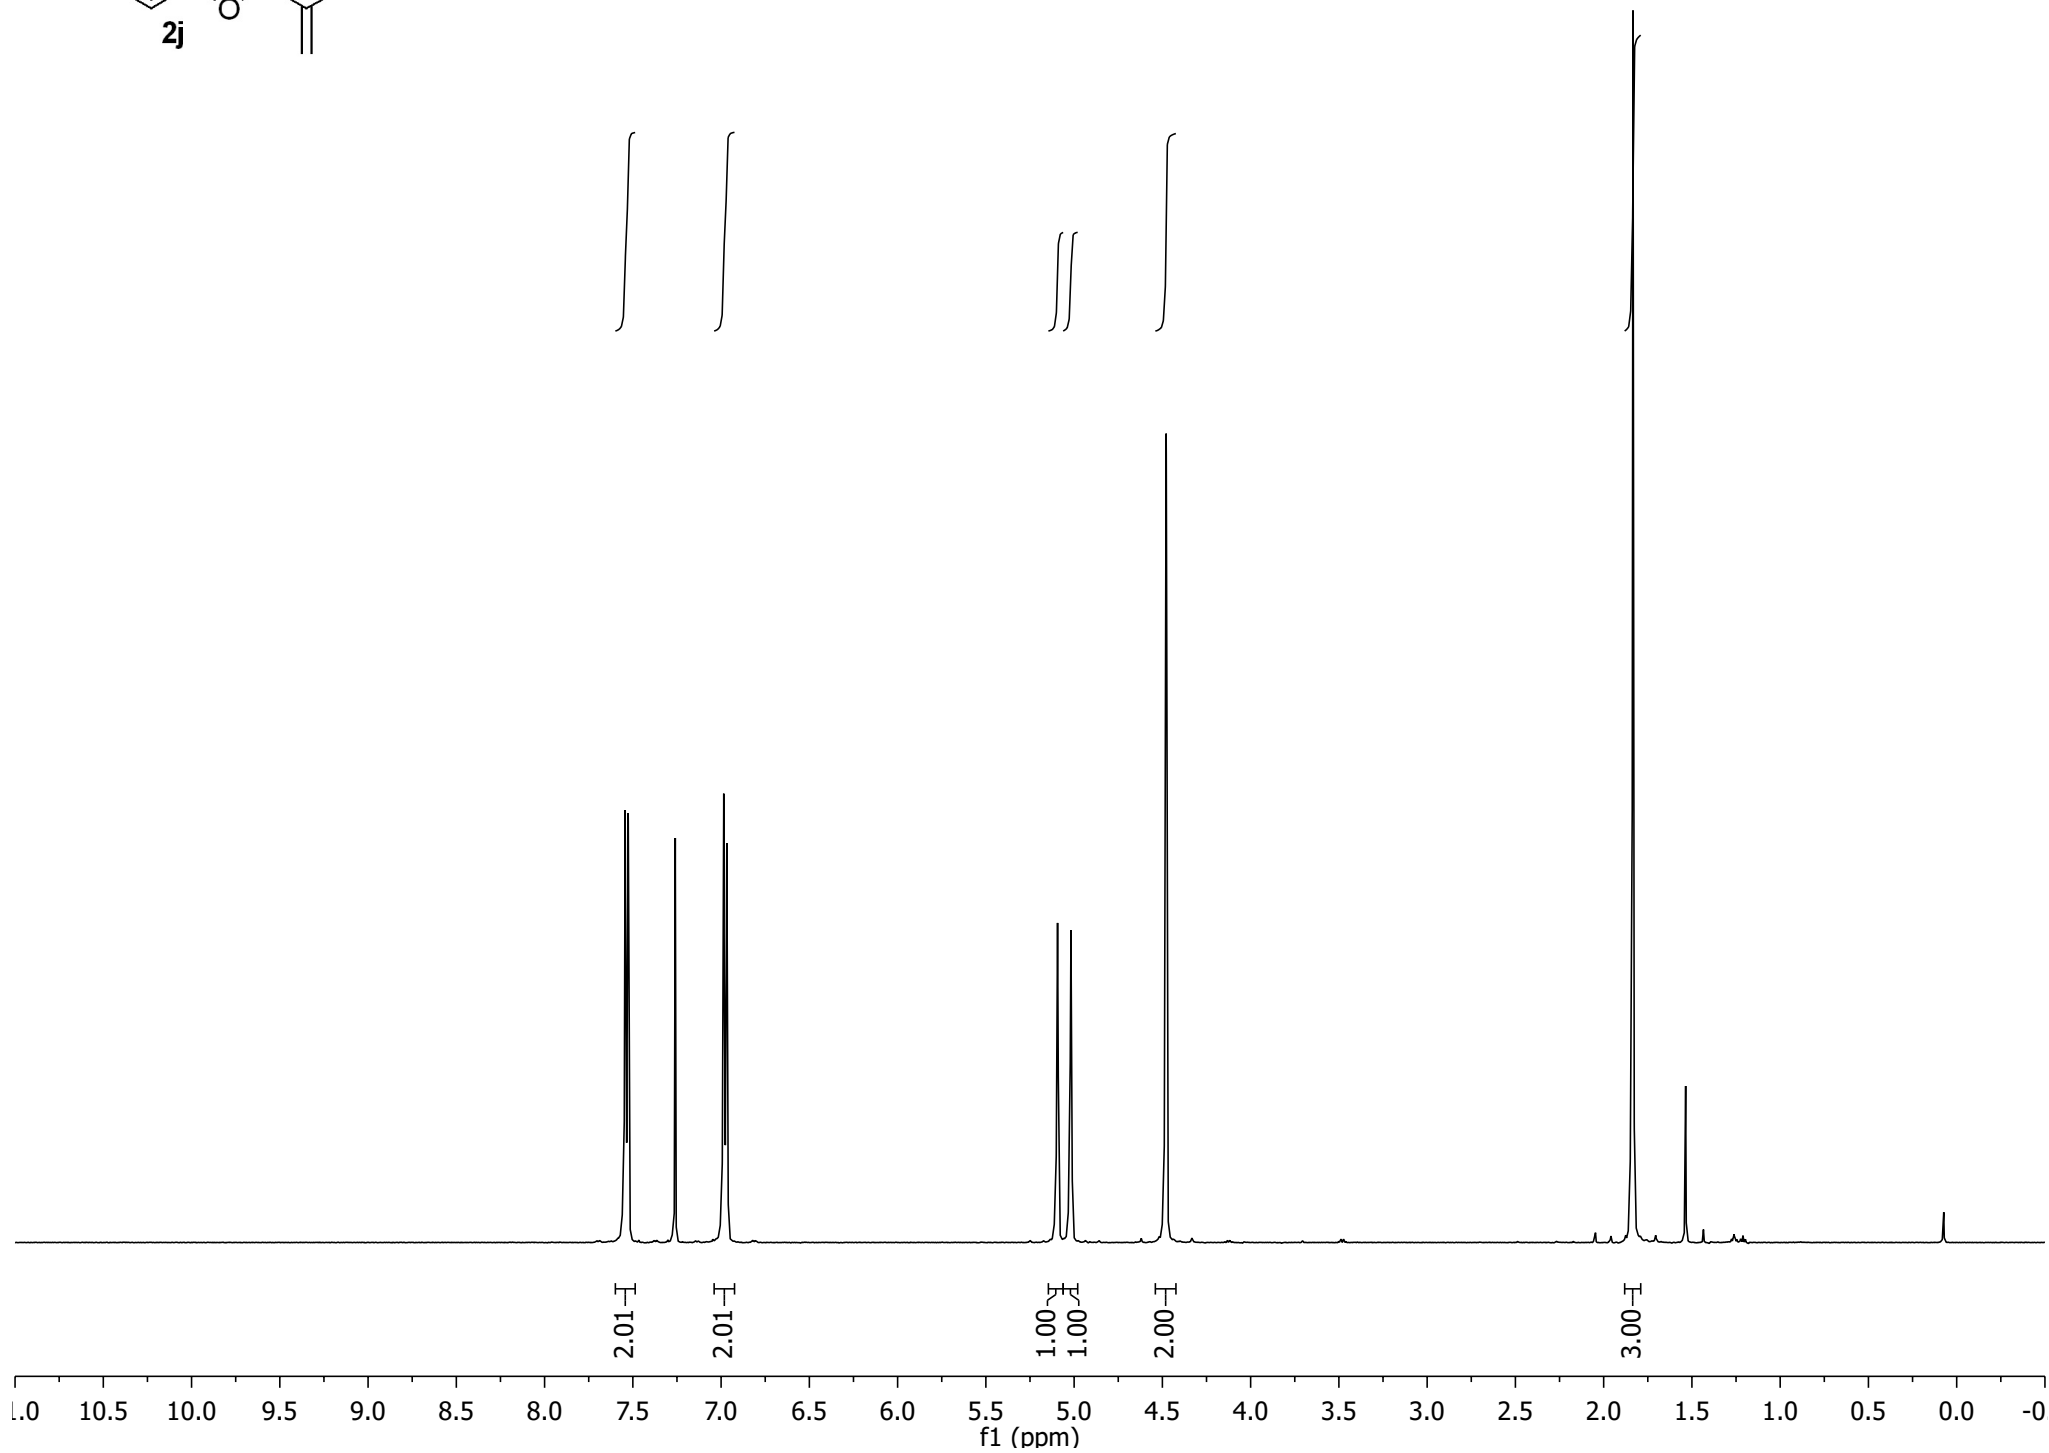

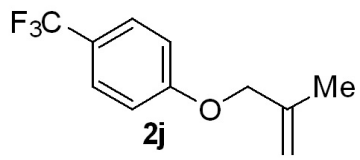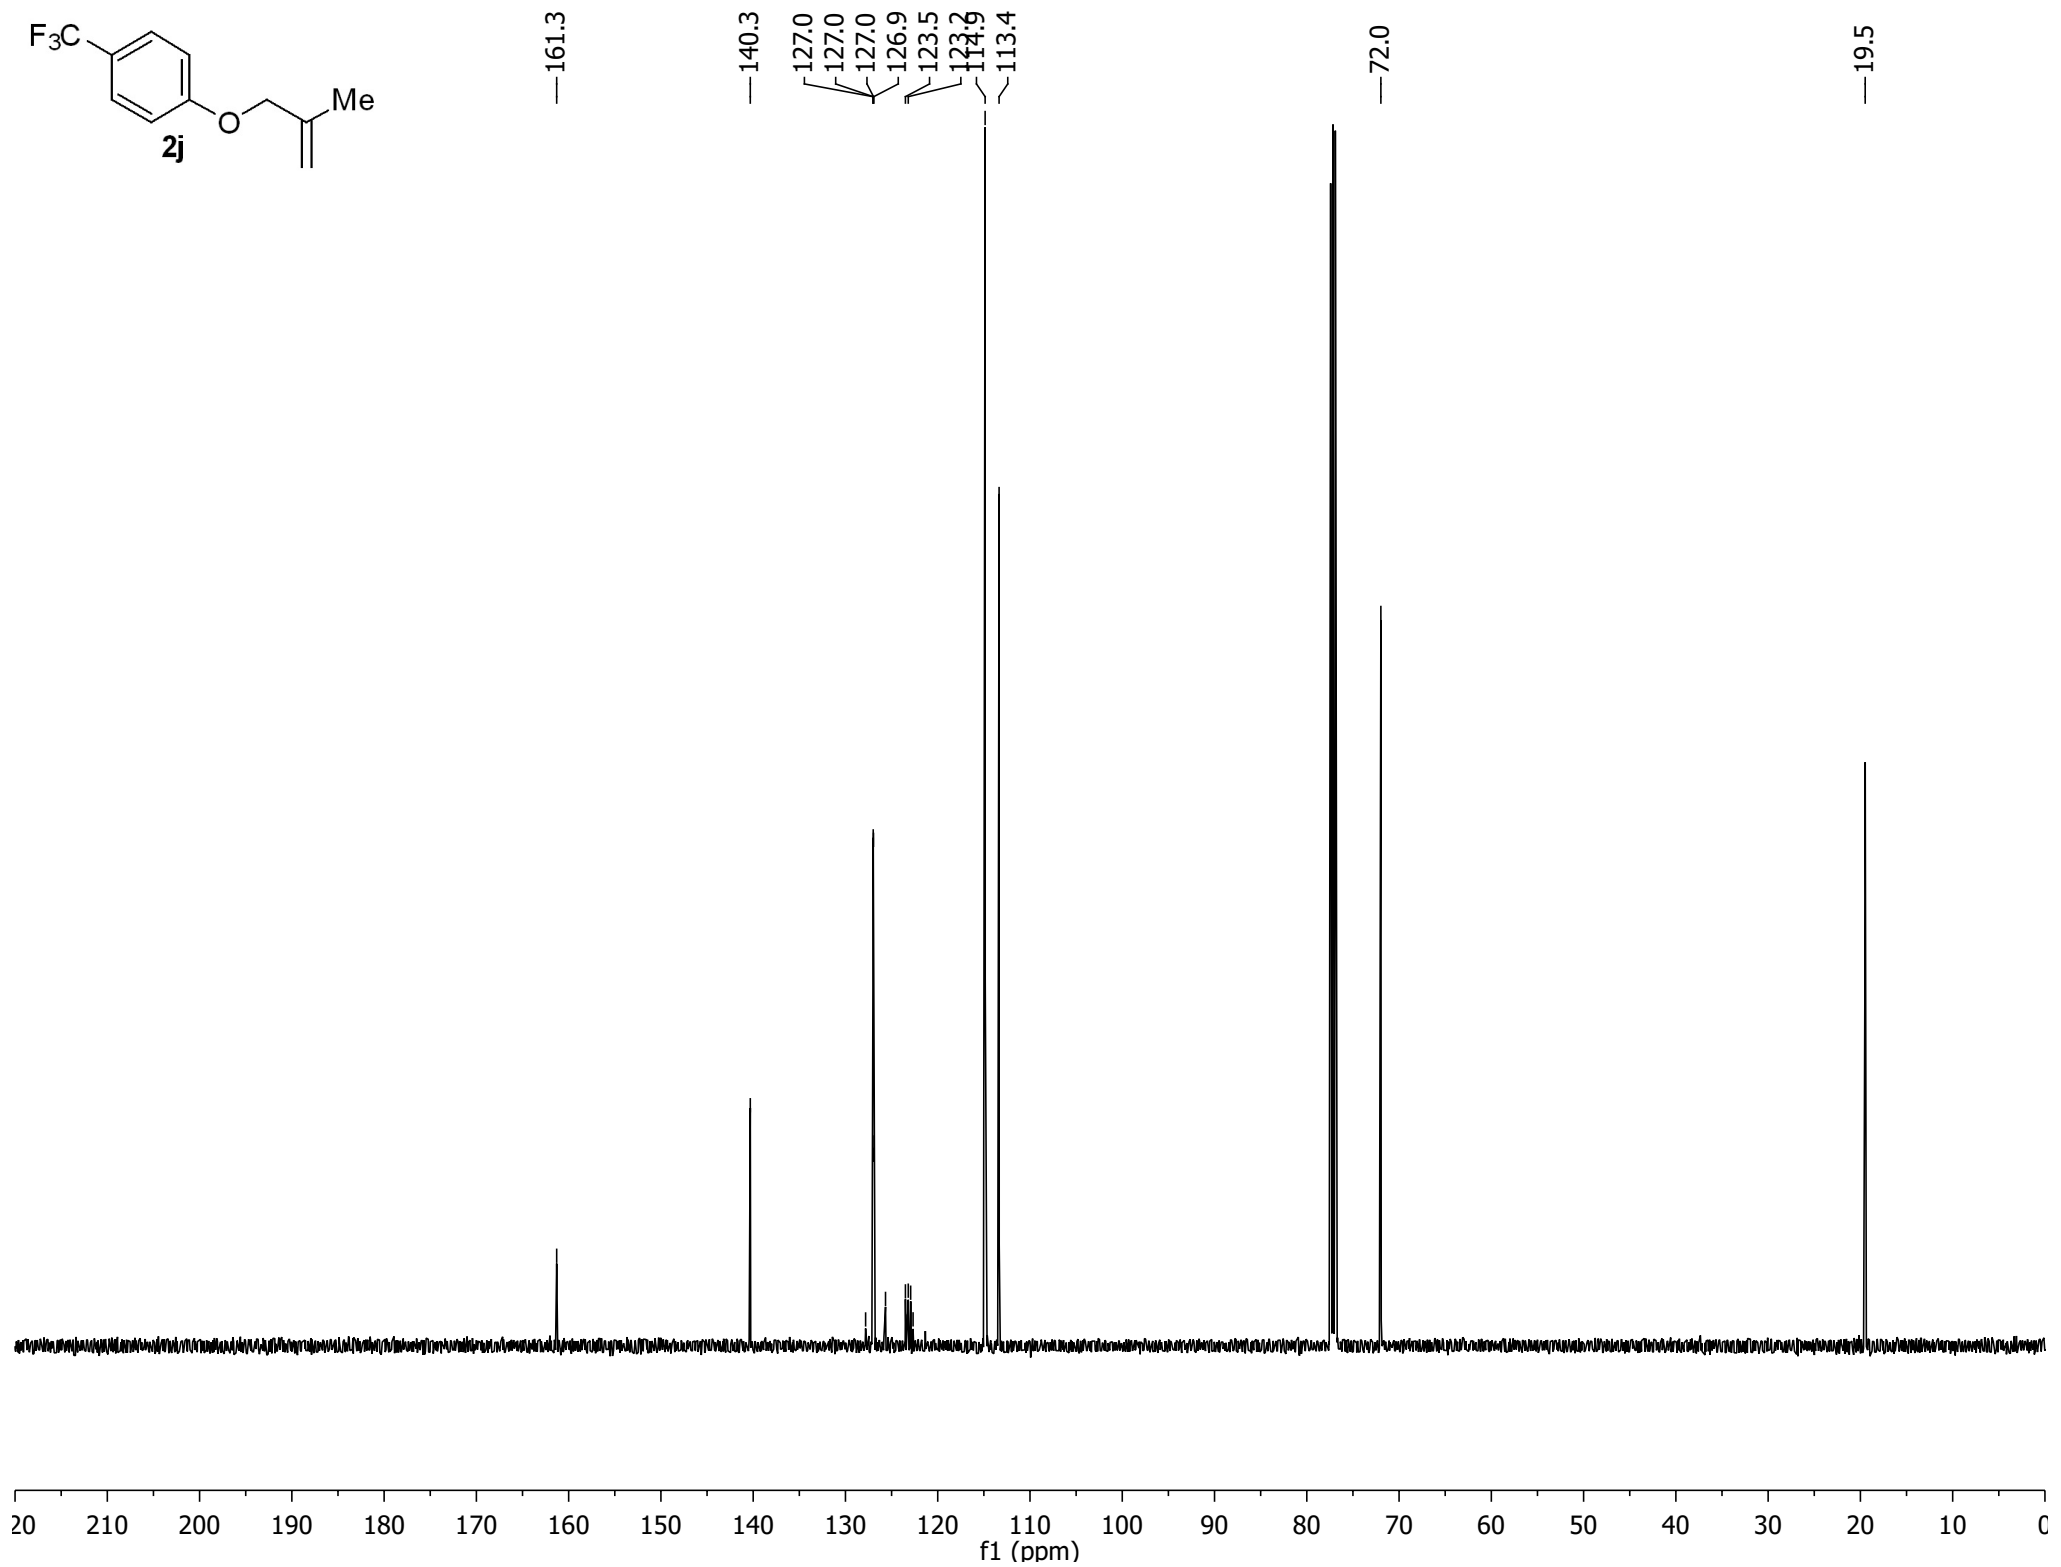

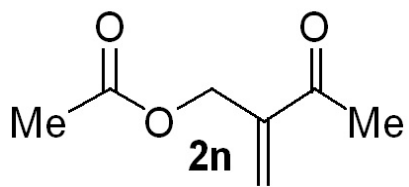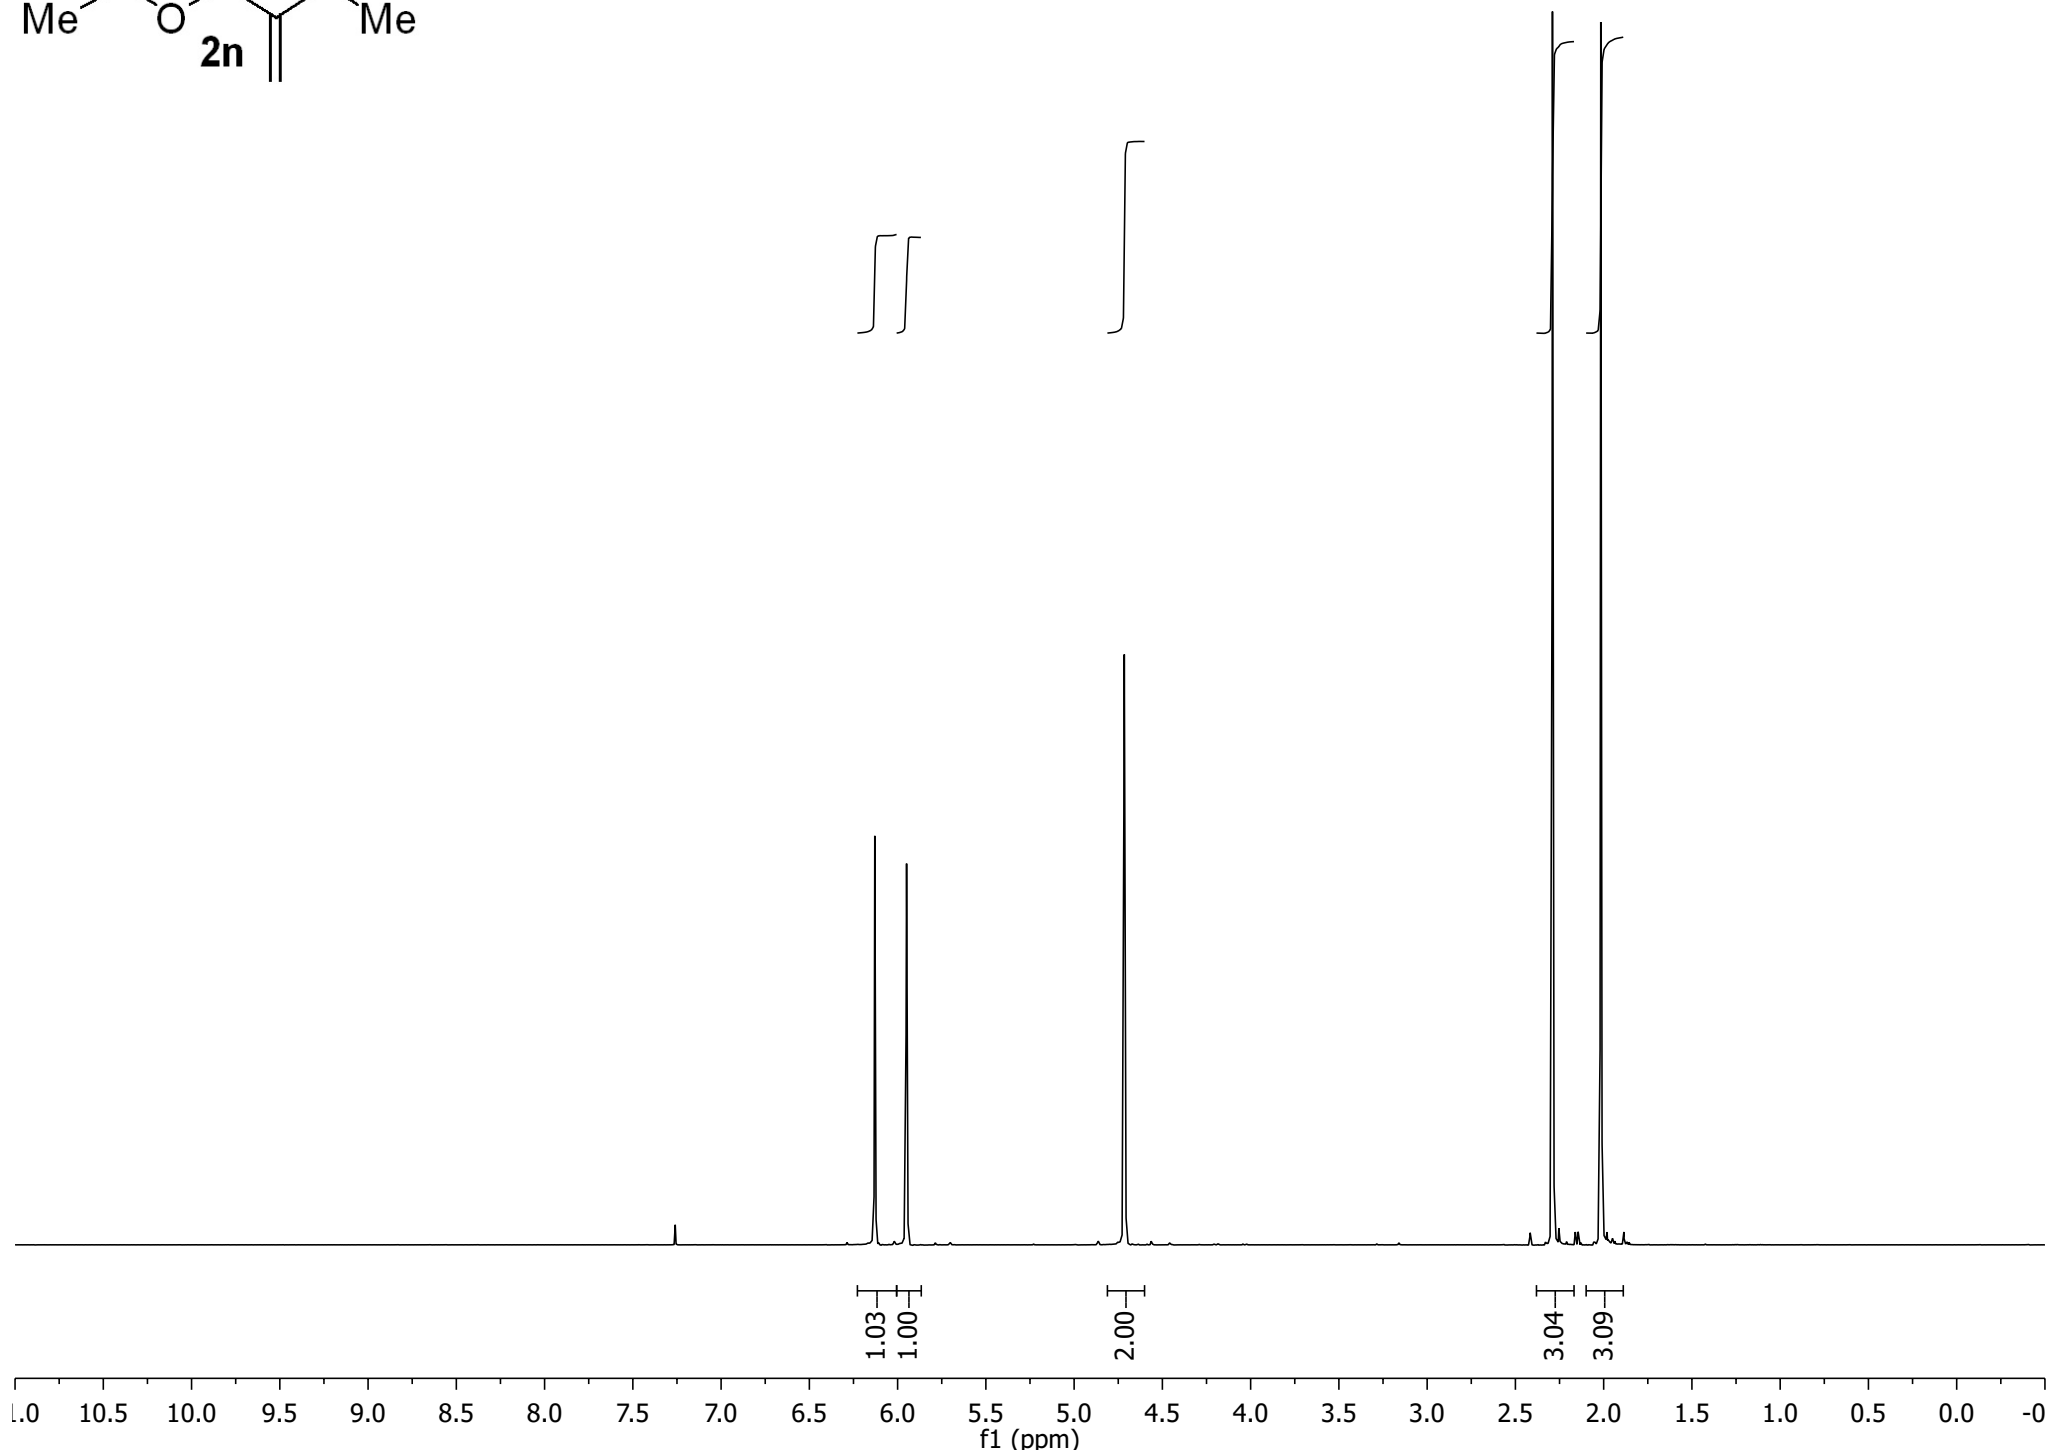

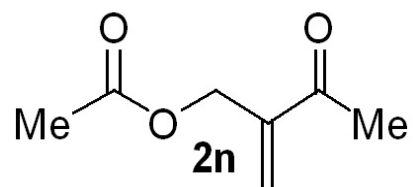

—198.0

—170.3

—143.2

—126.7

61.9

—25.8

—20.8

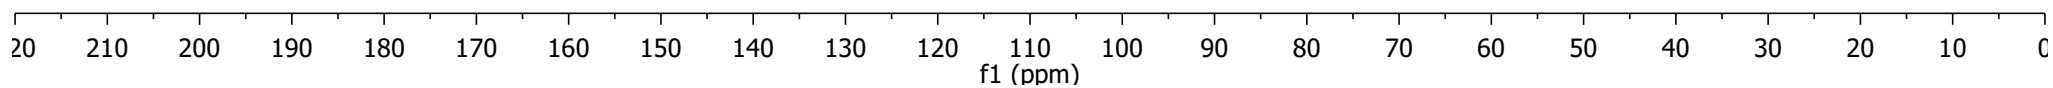

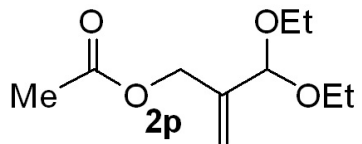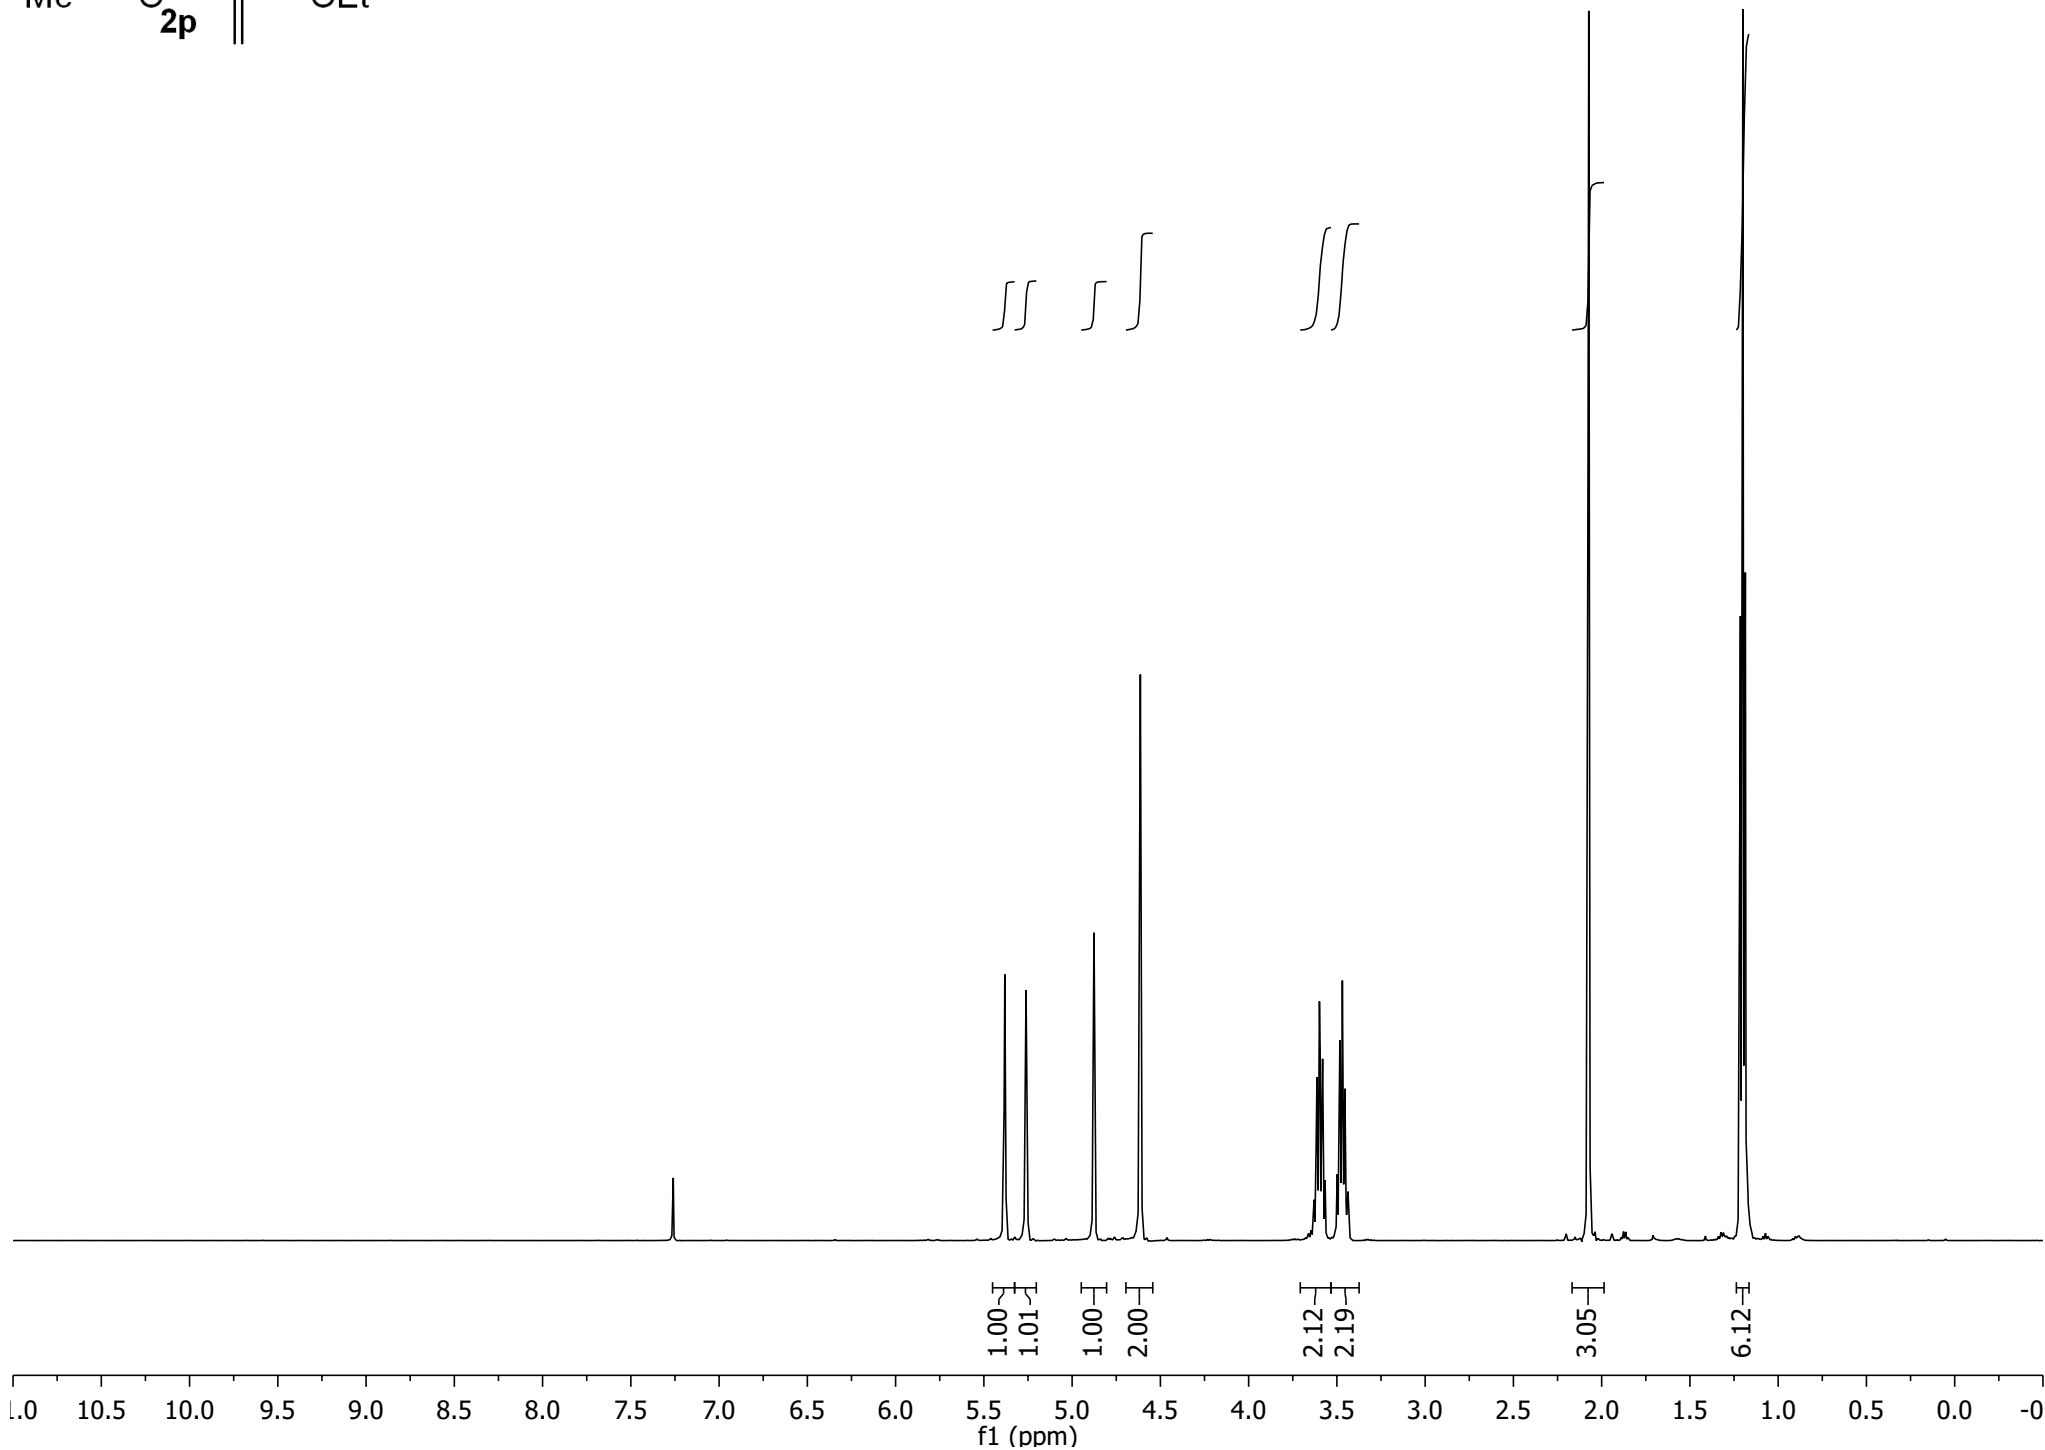

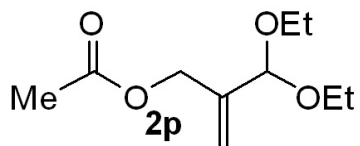

—170.7

—141.1

—115.4

—101.2

~63.5

~61.7

—21.0

—15.2

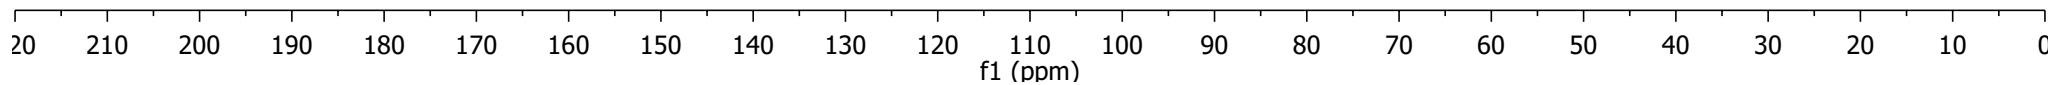



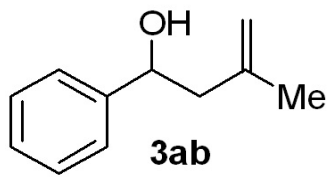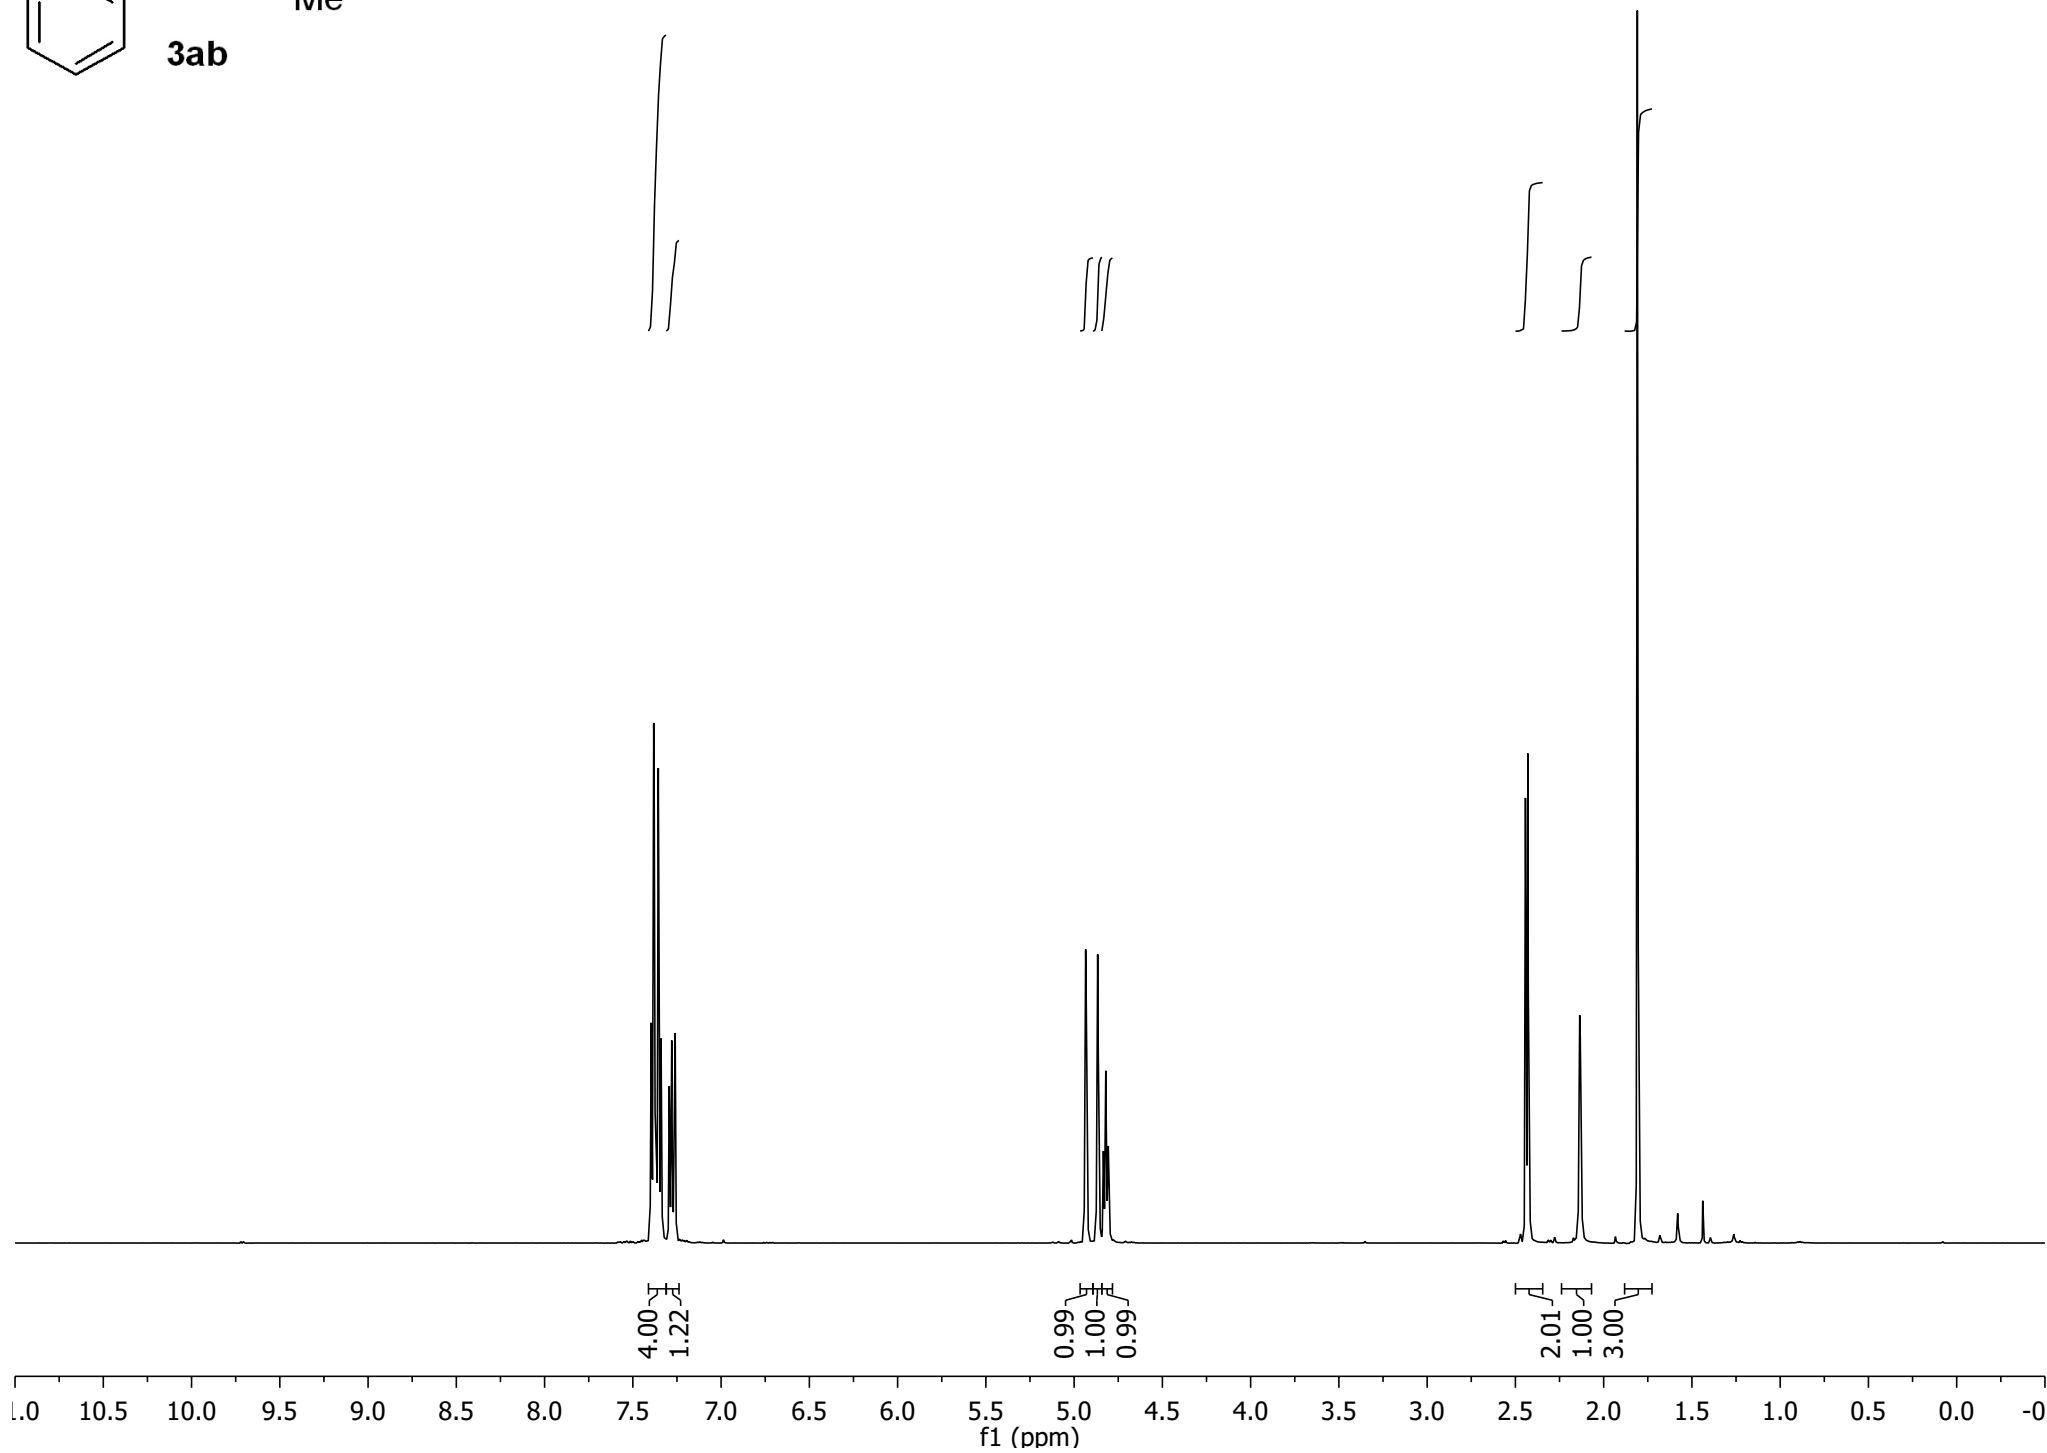

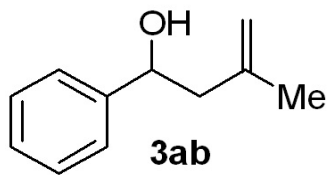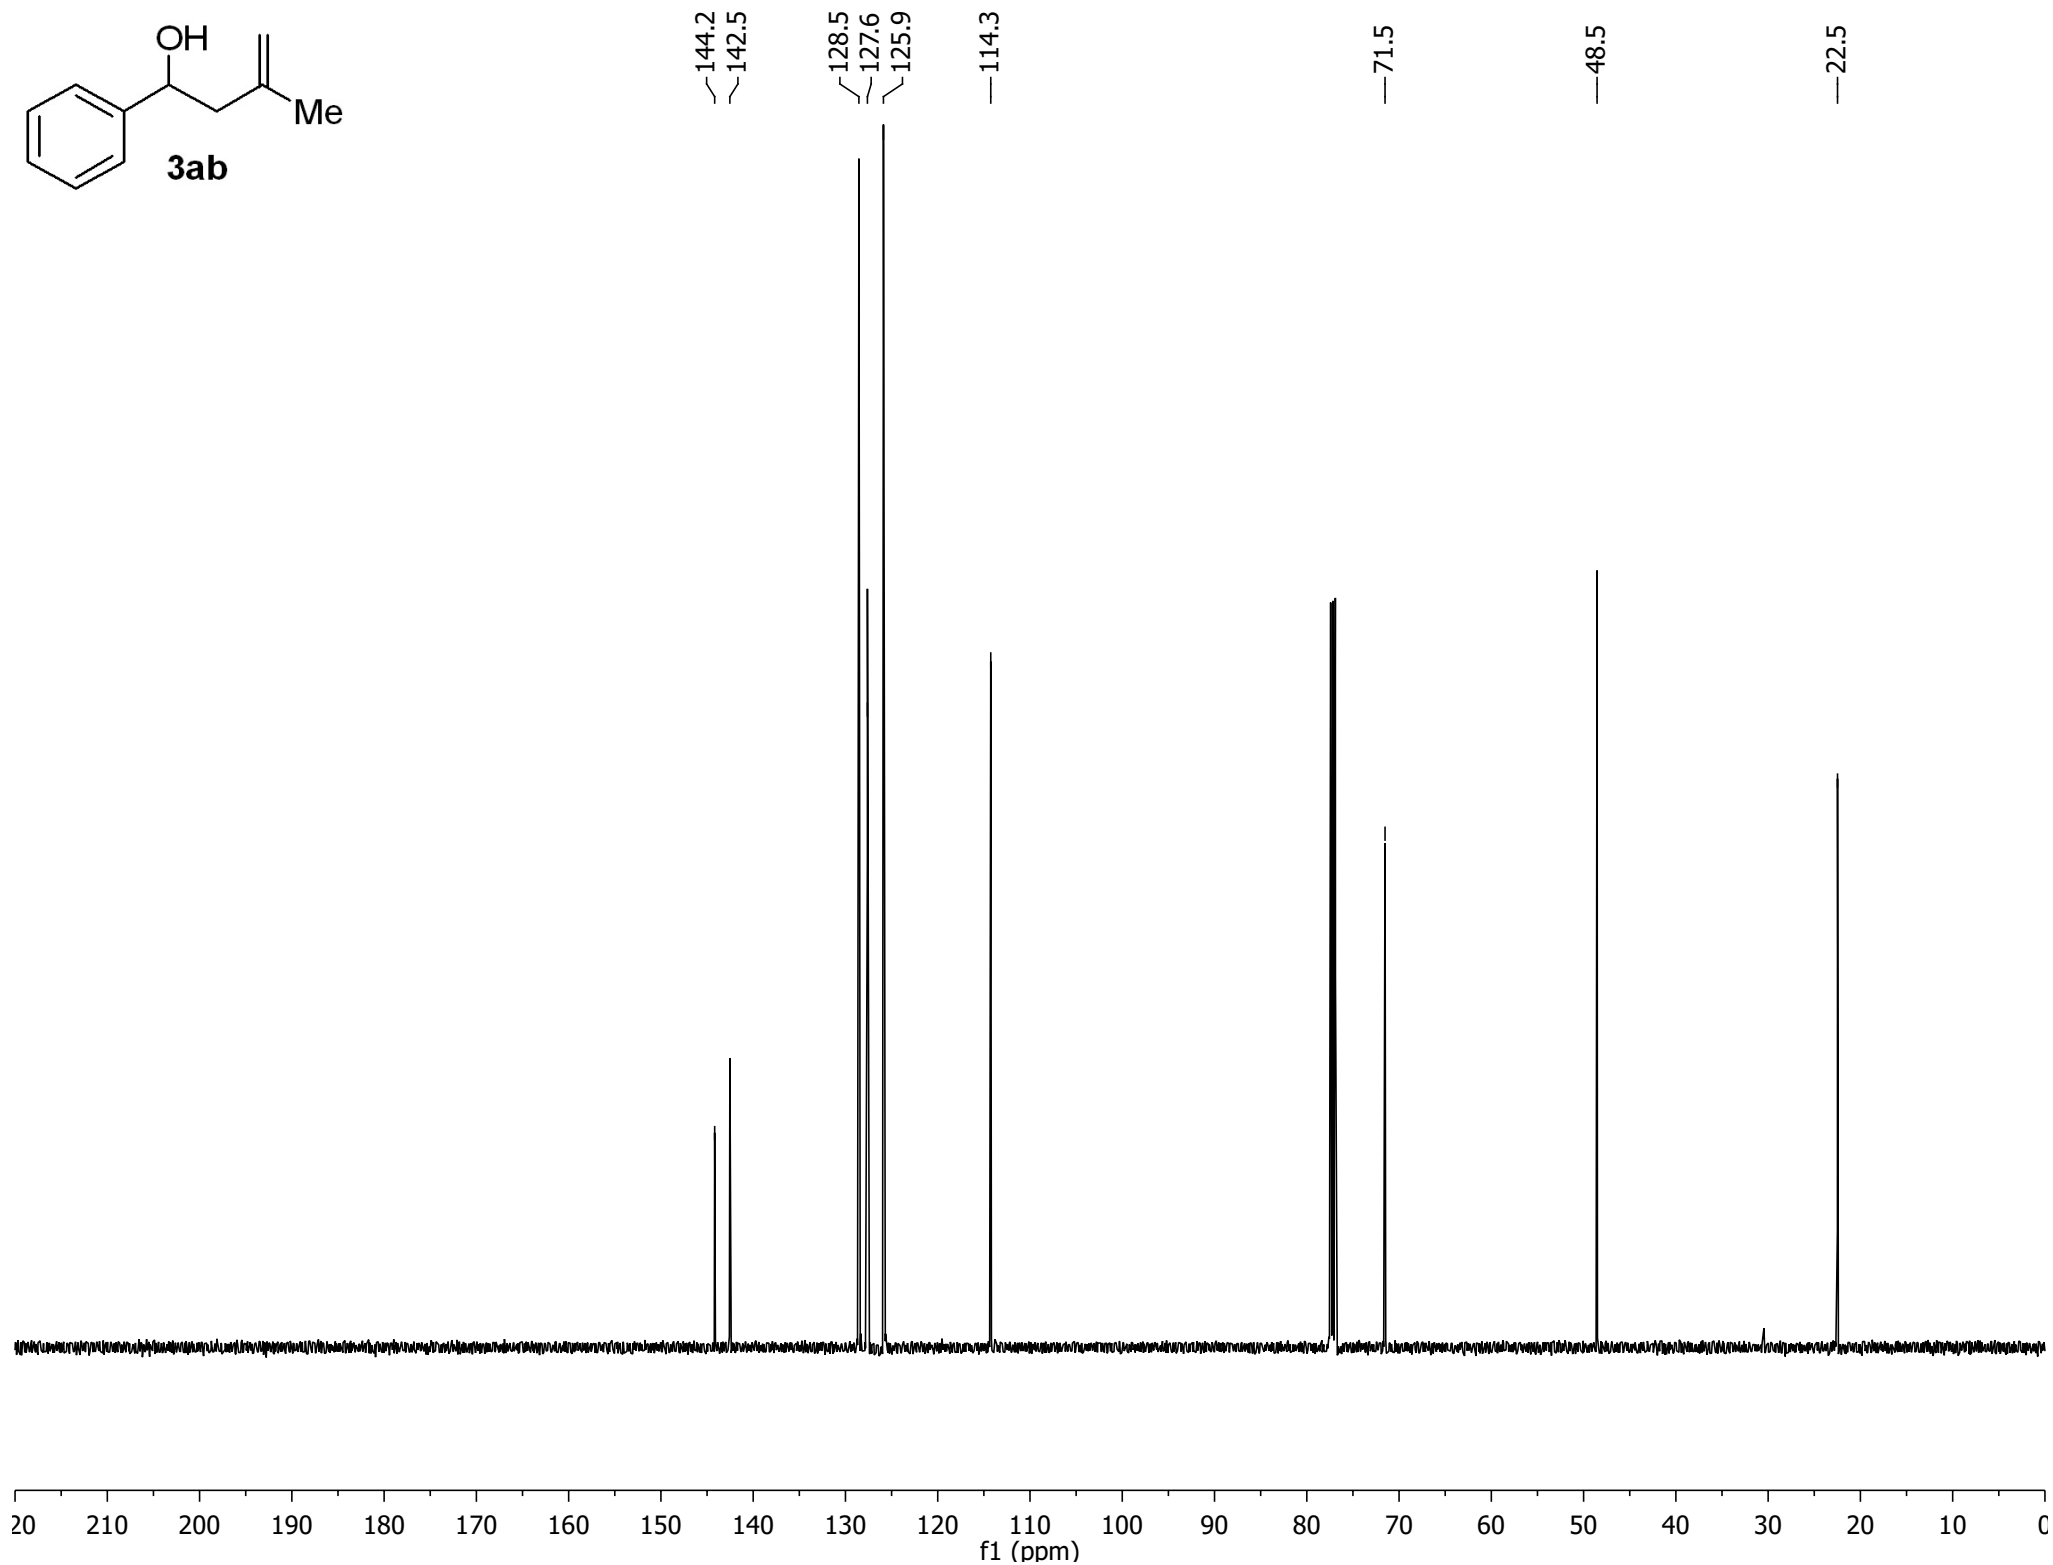

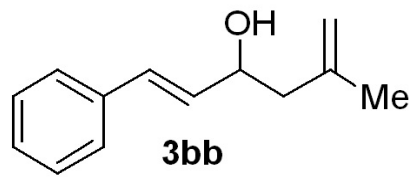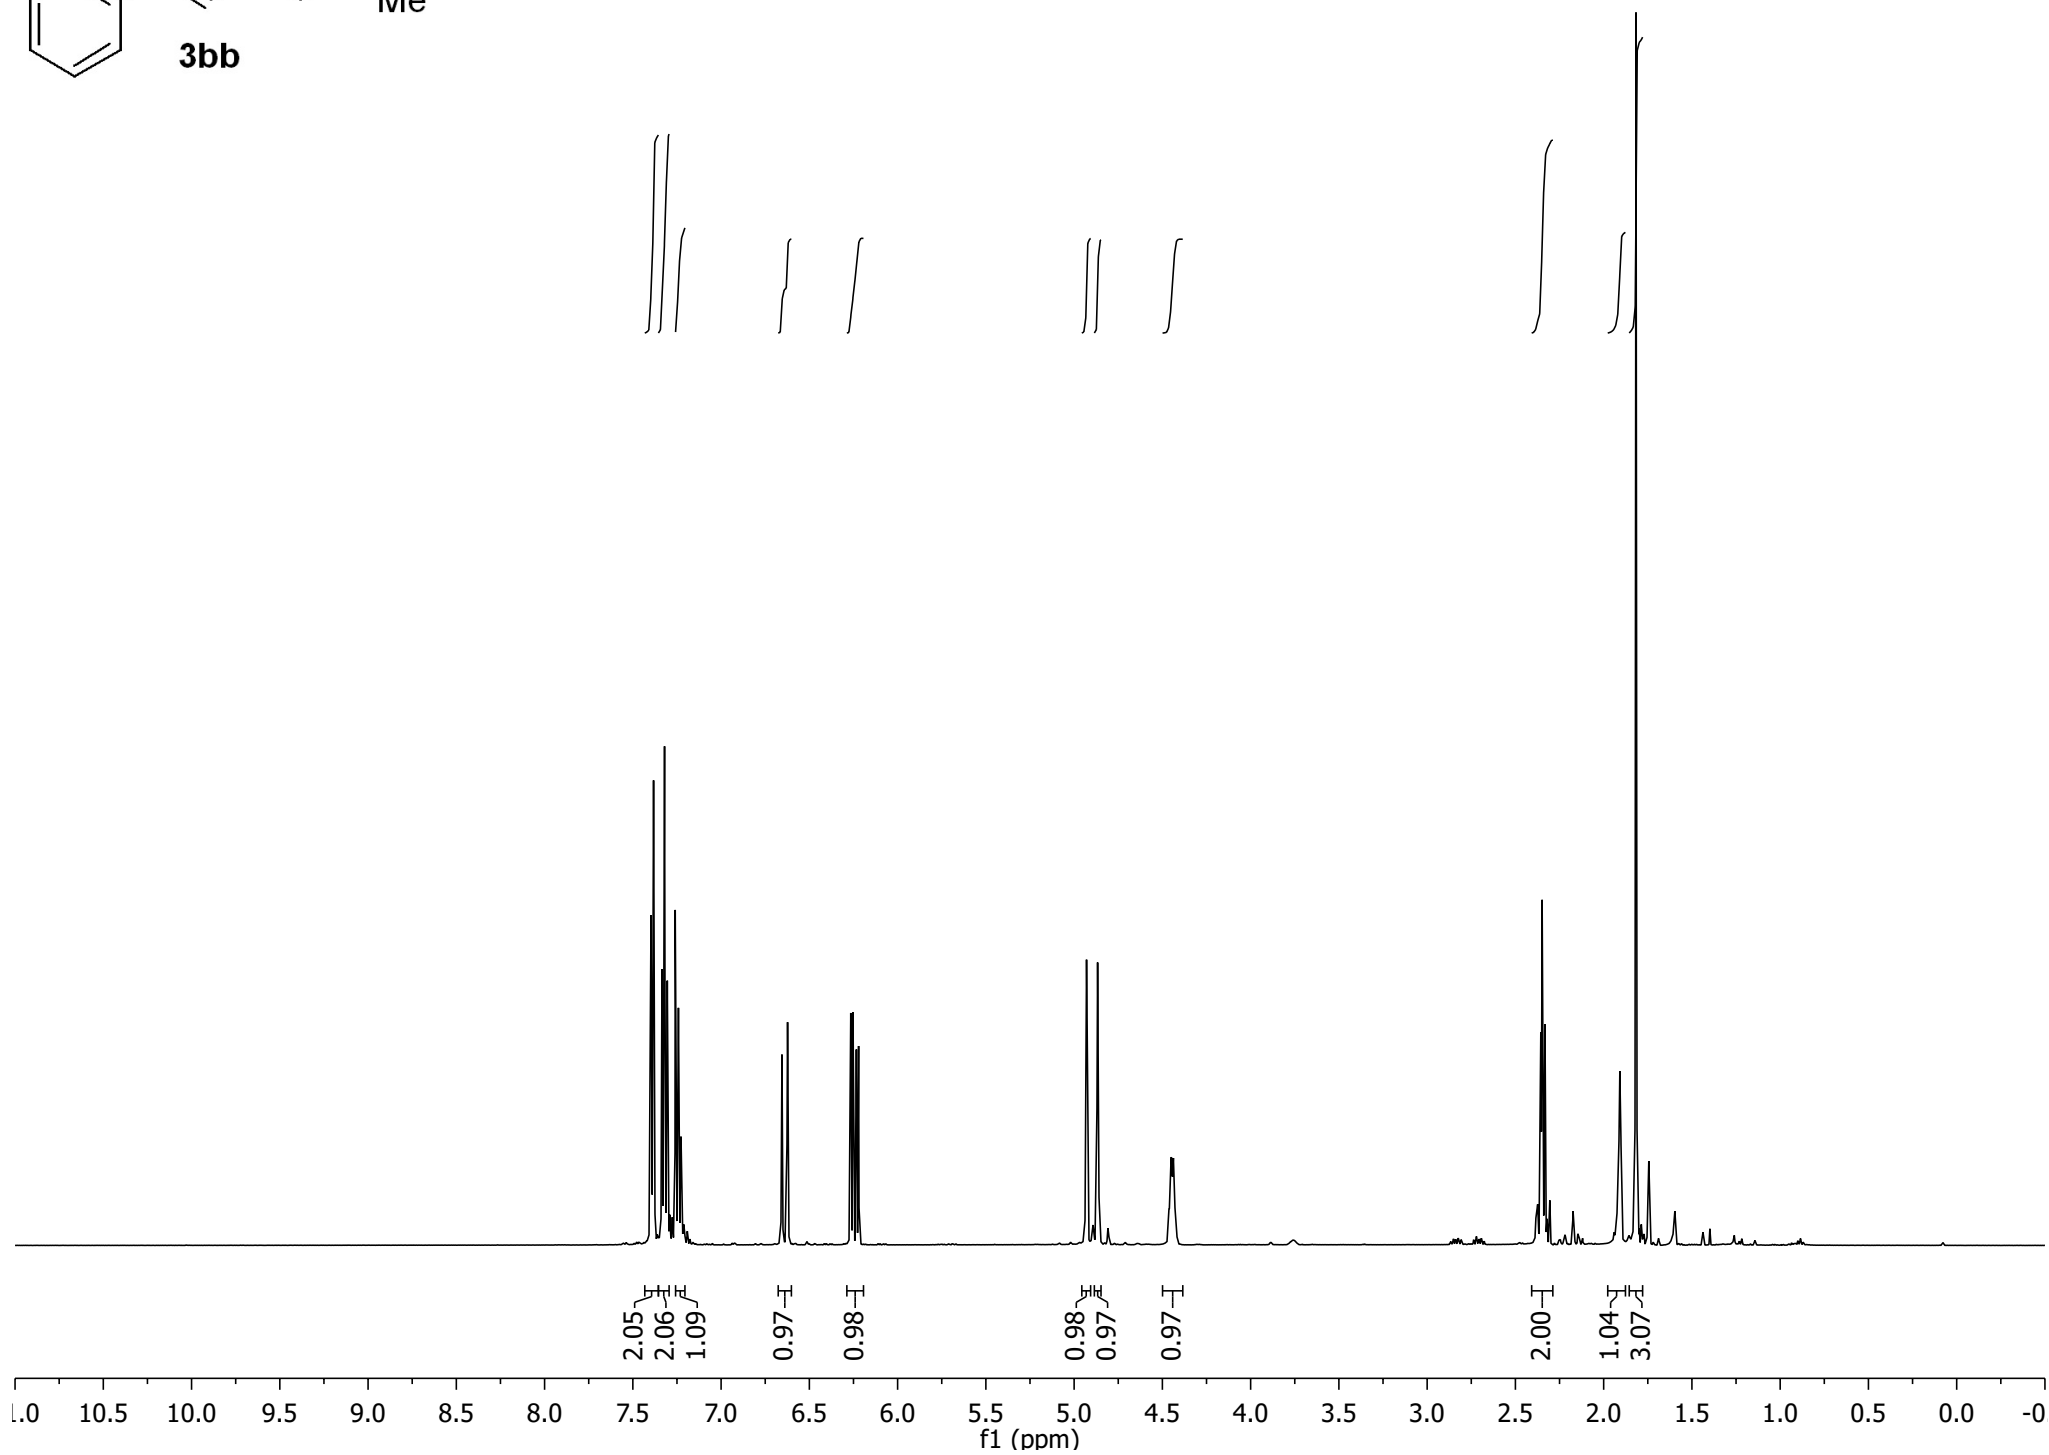

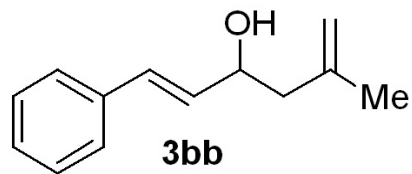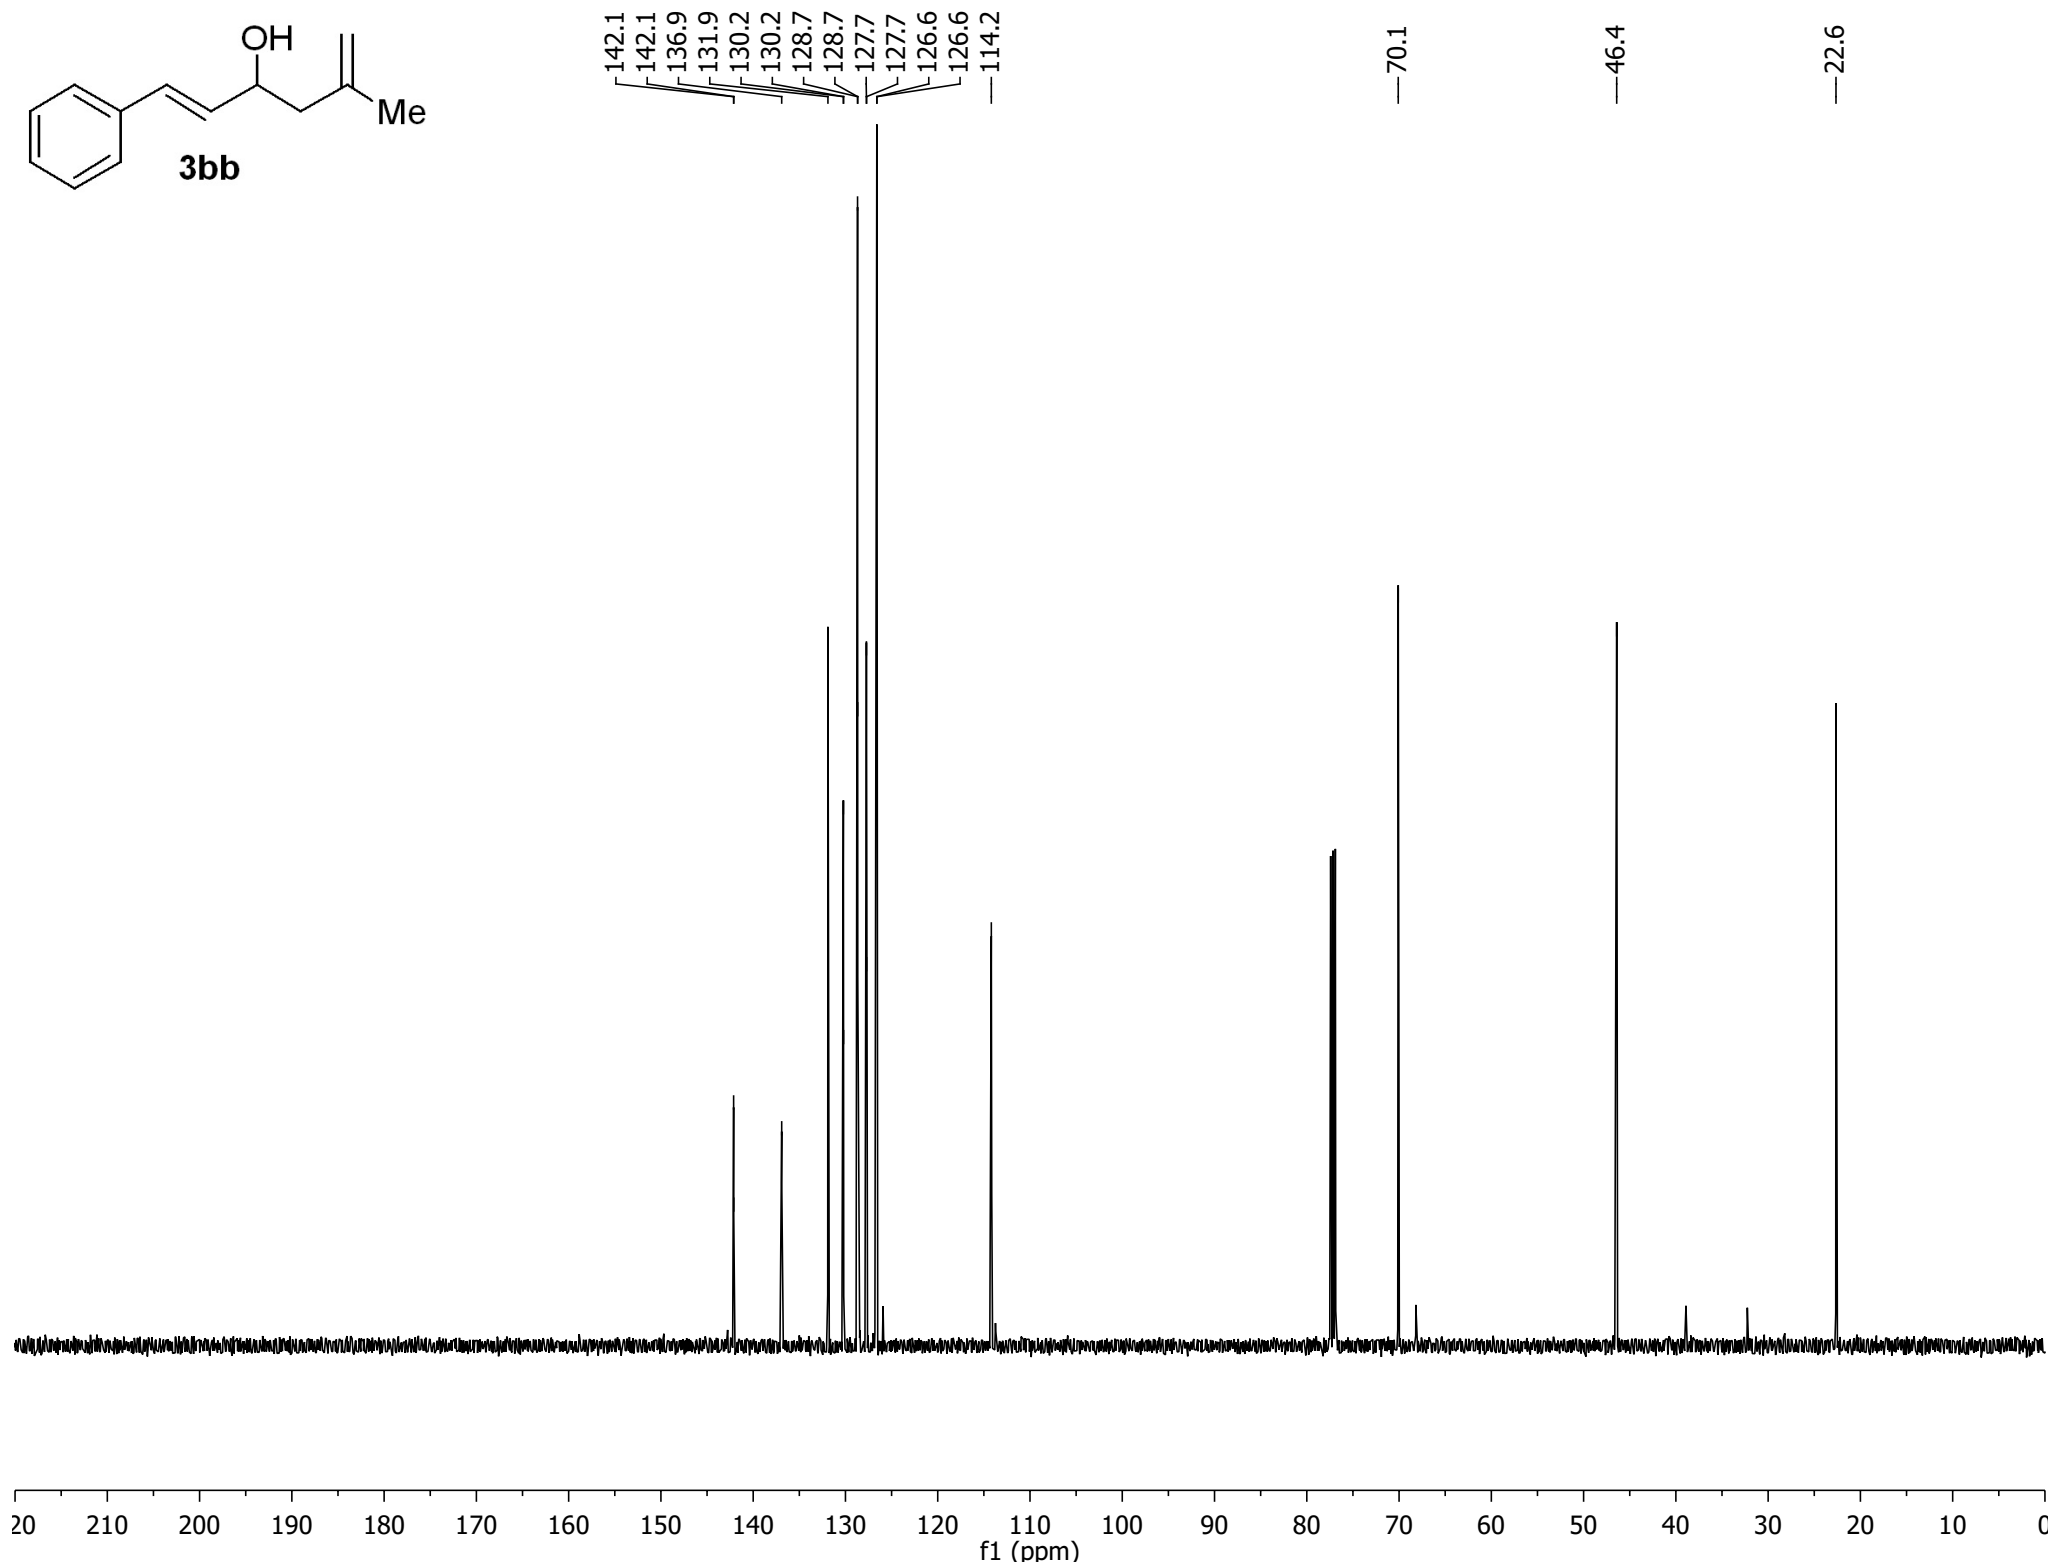

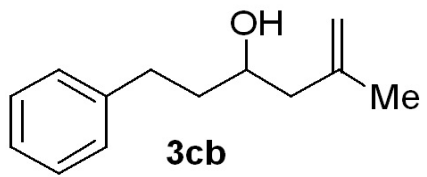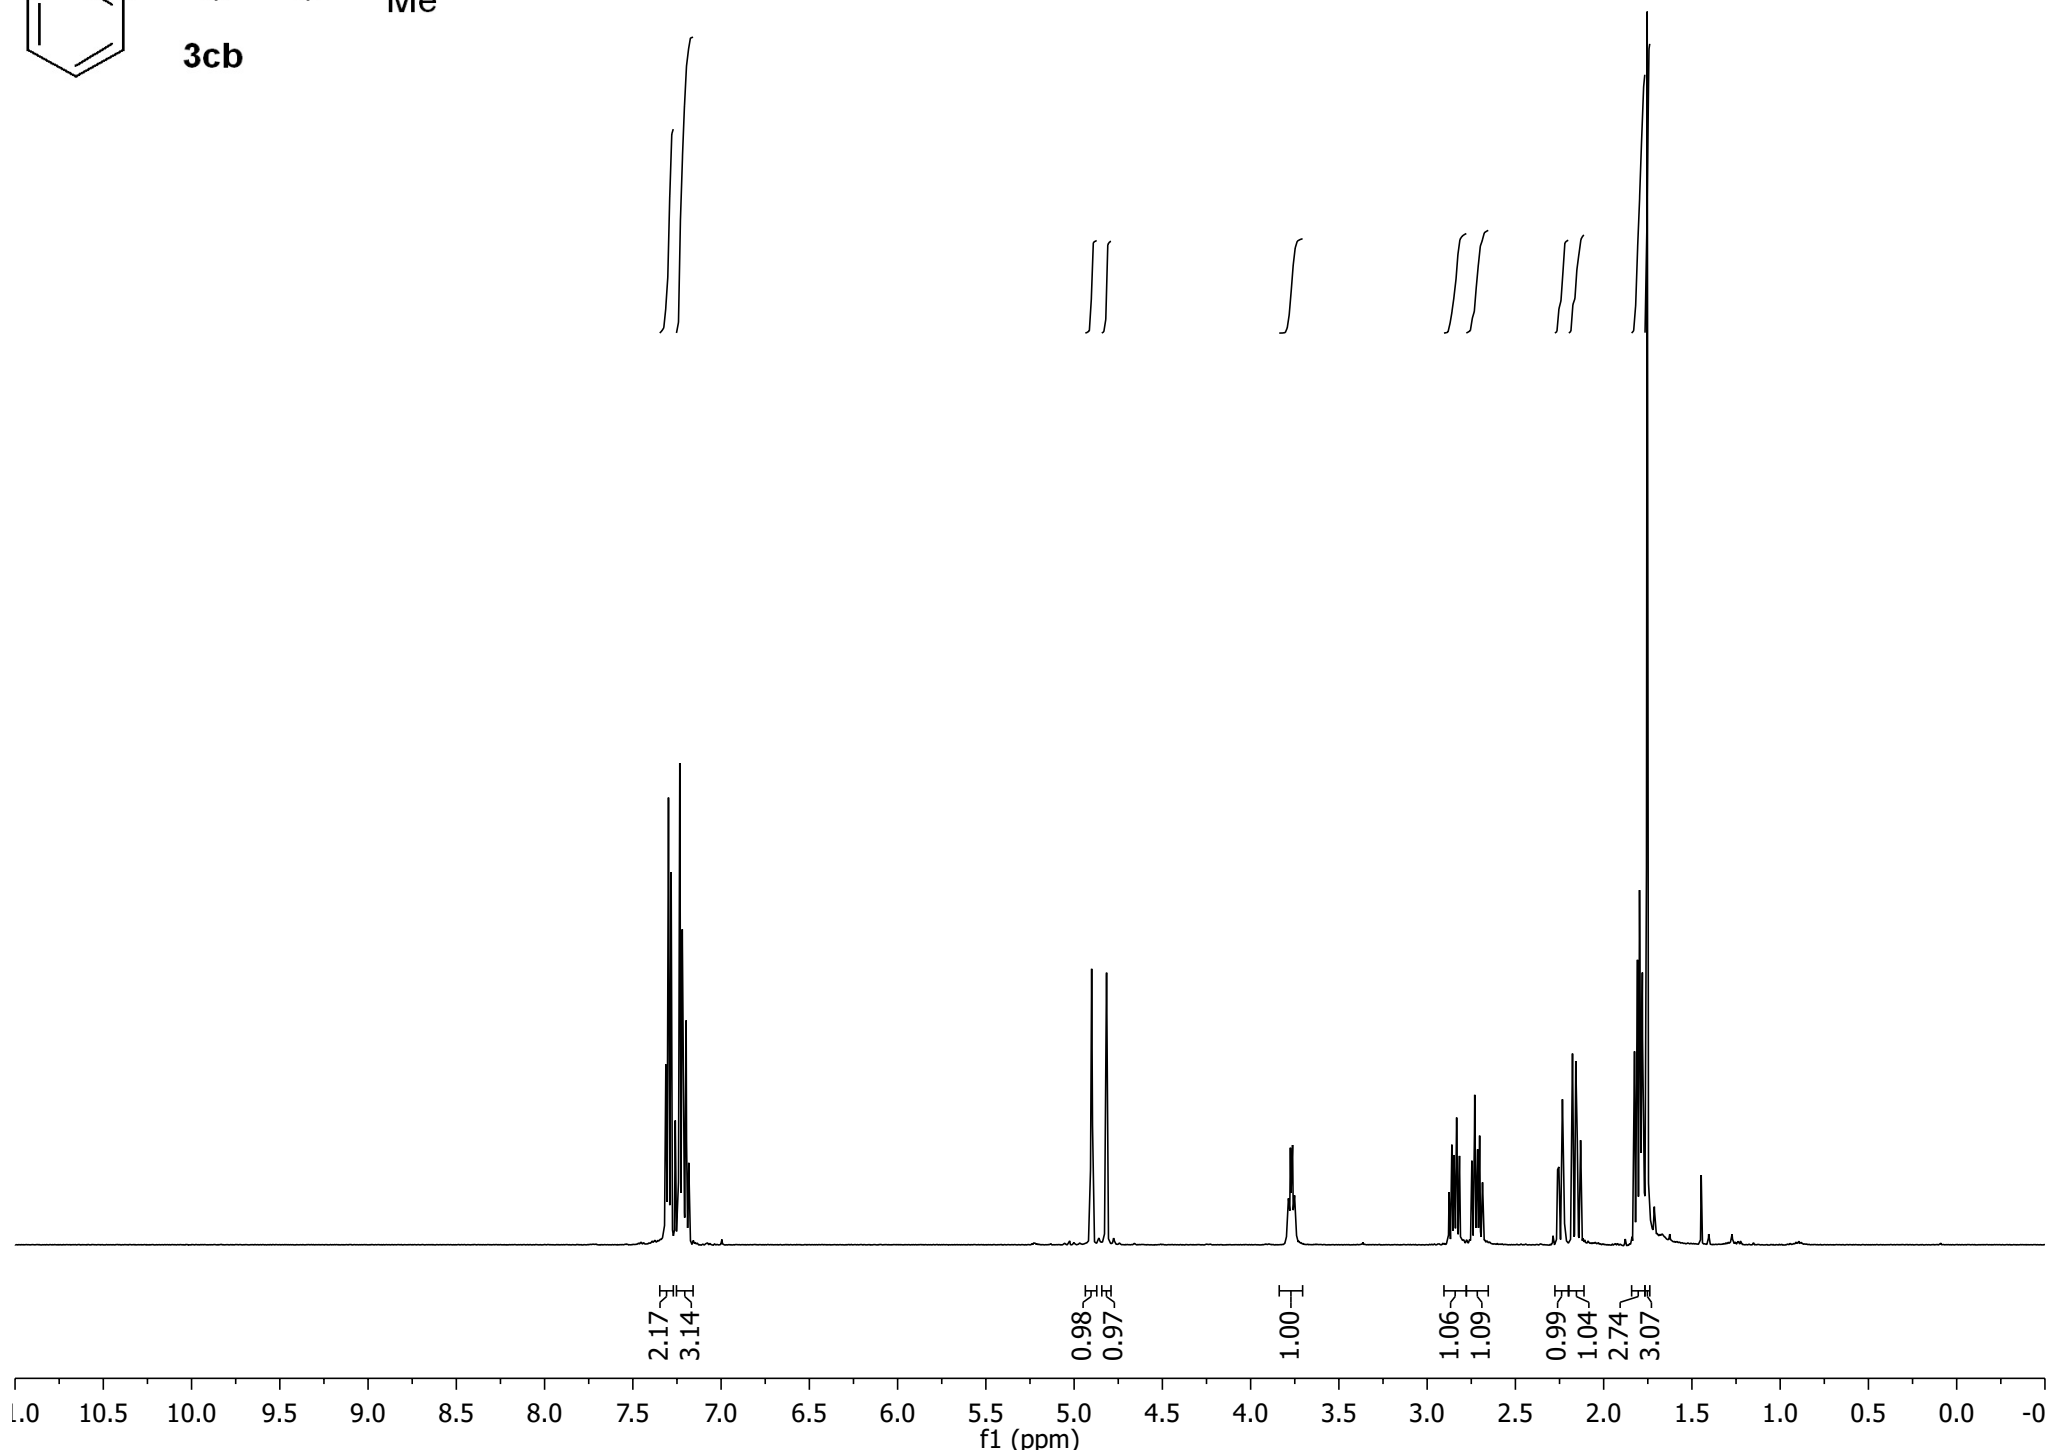

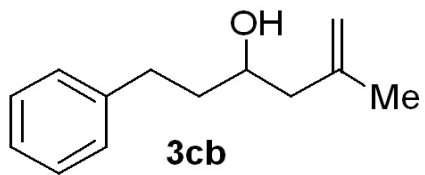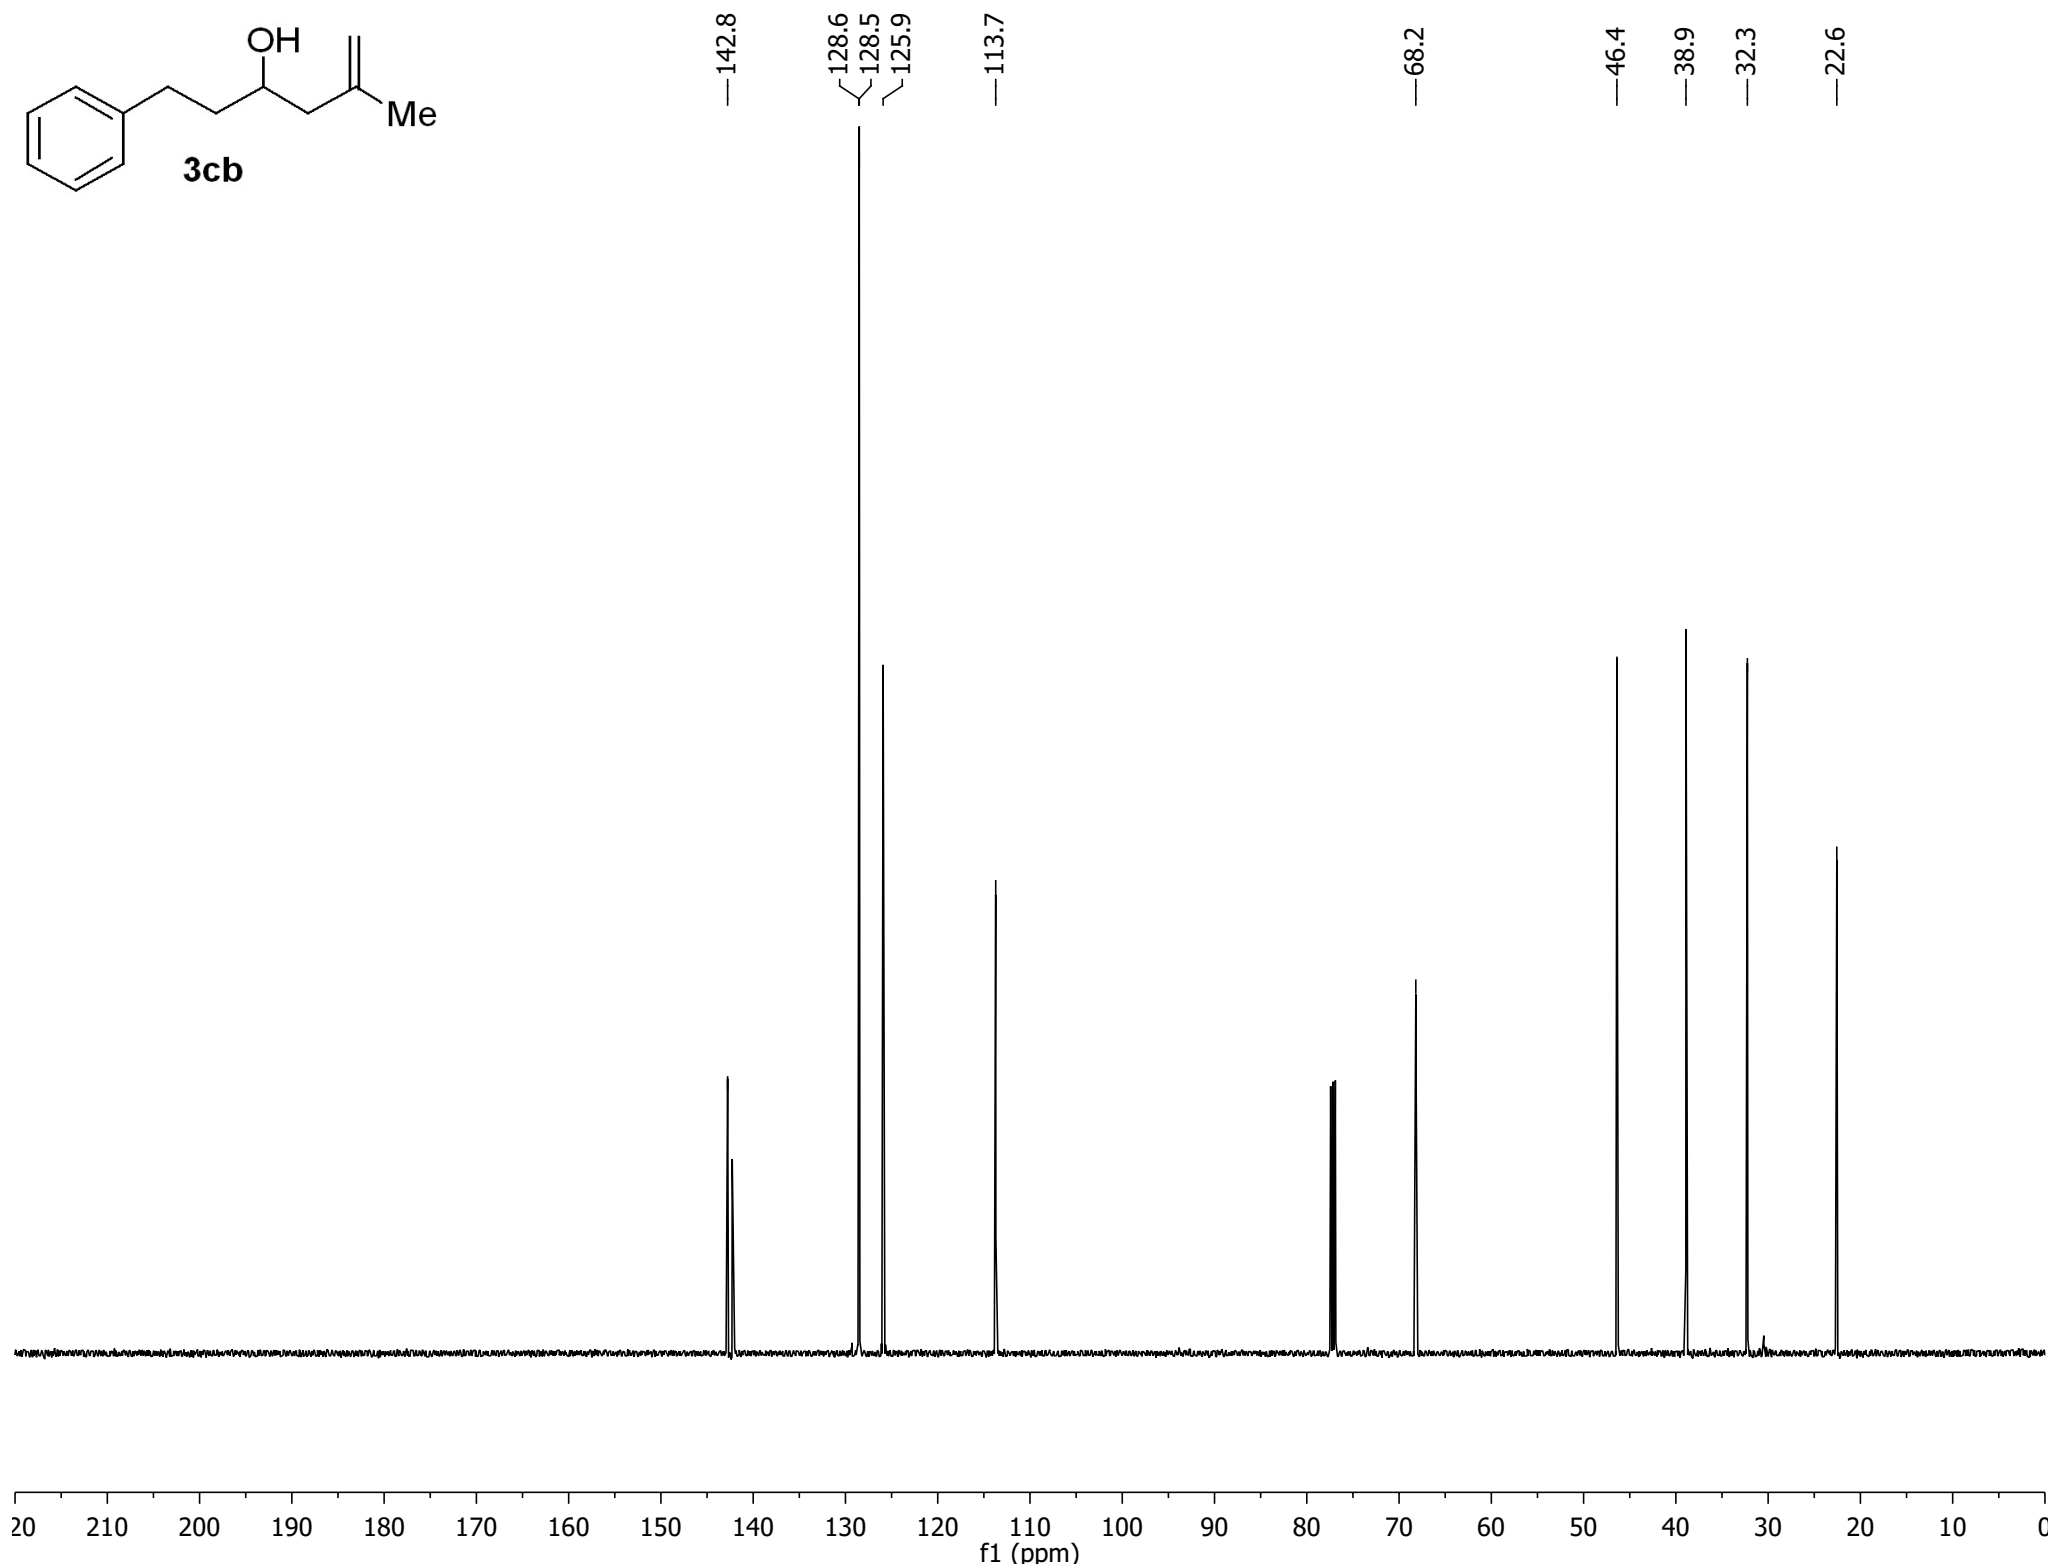

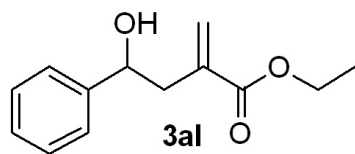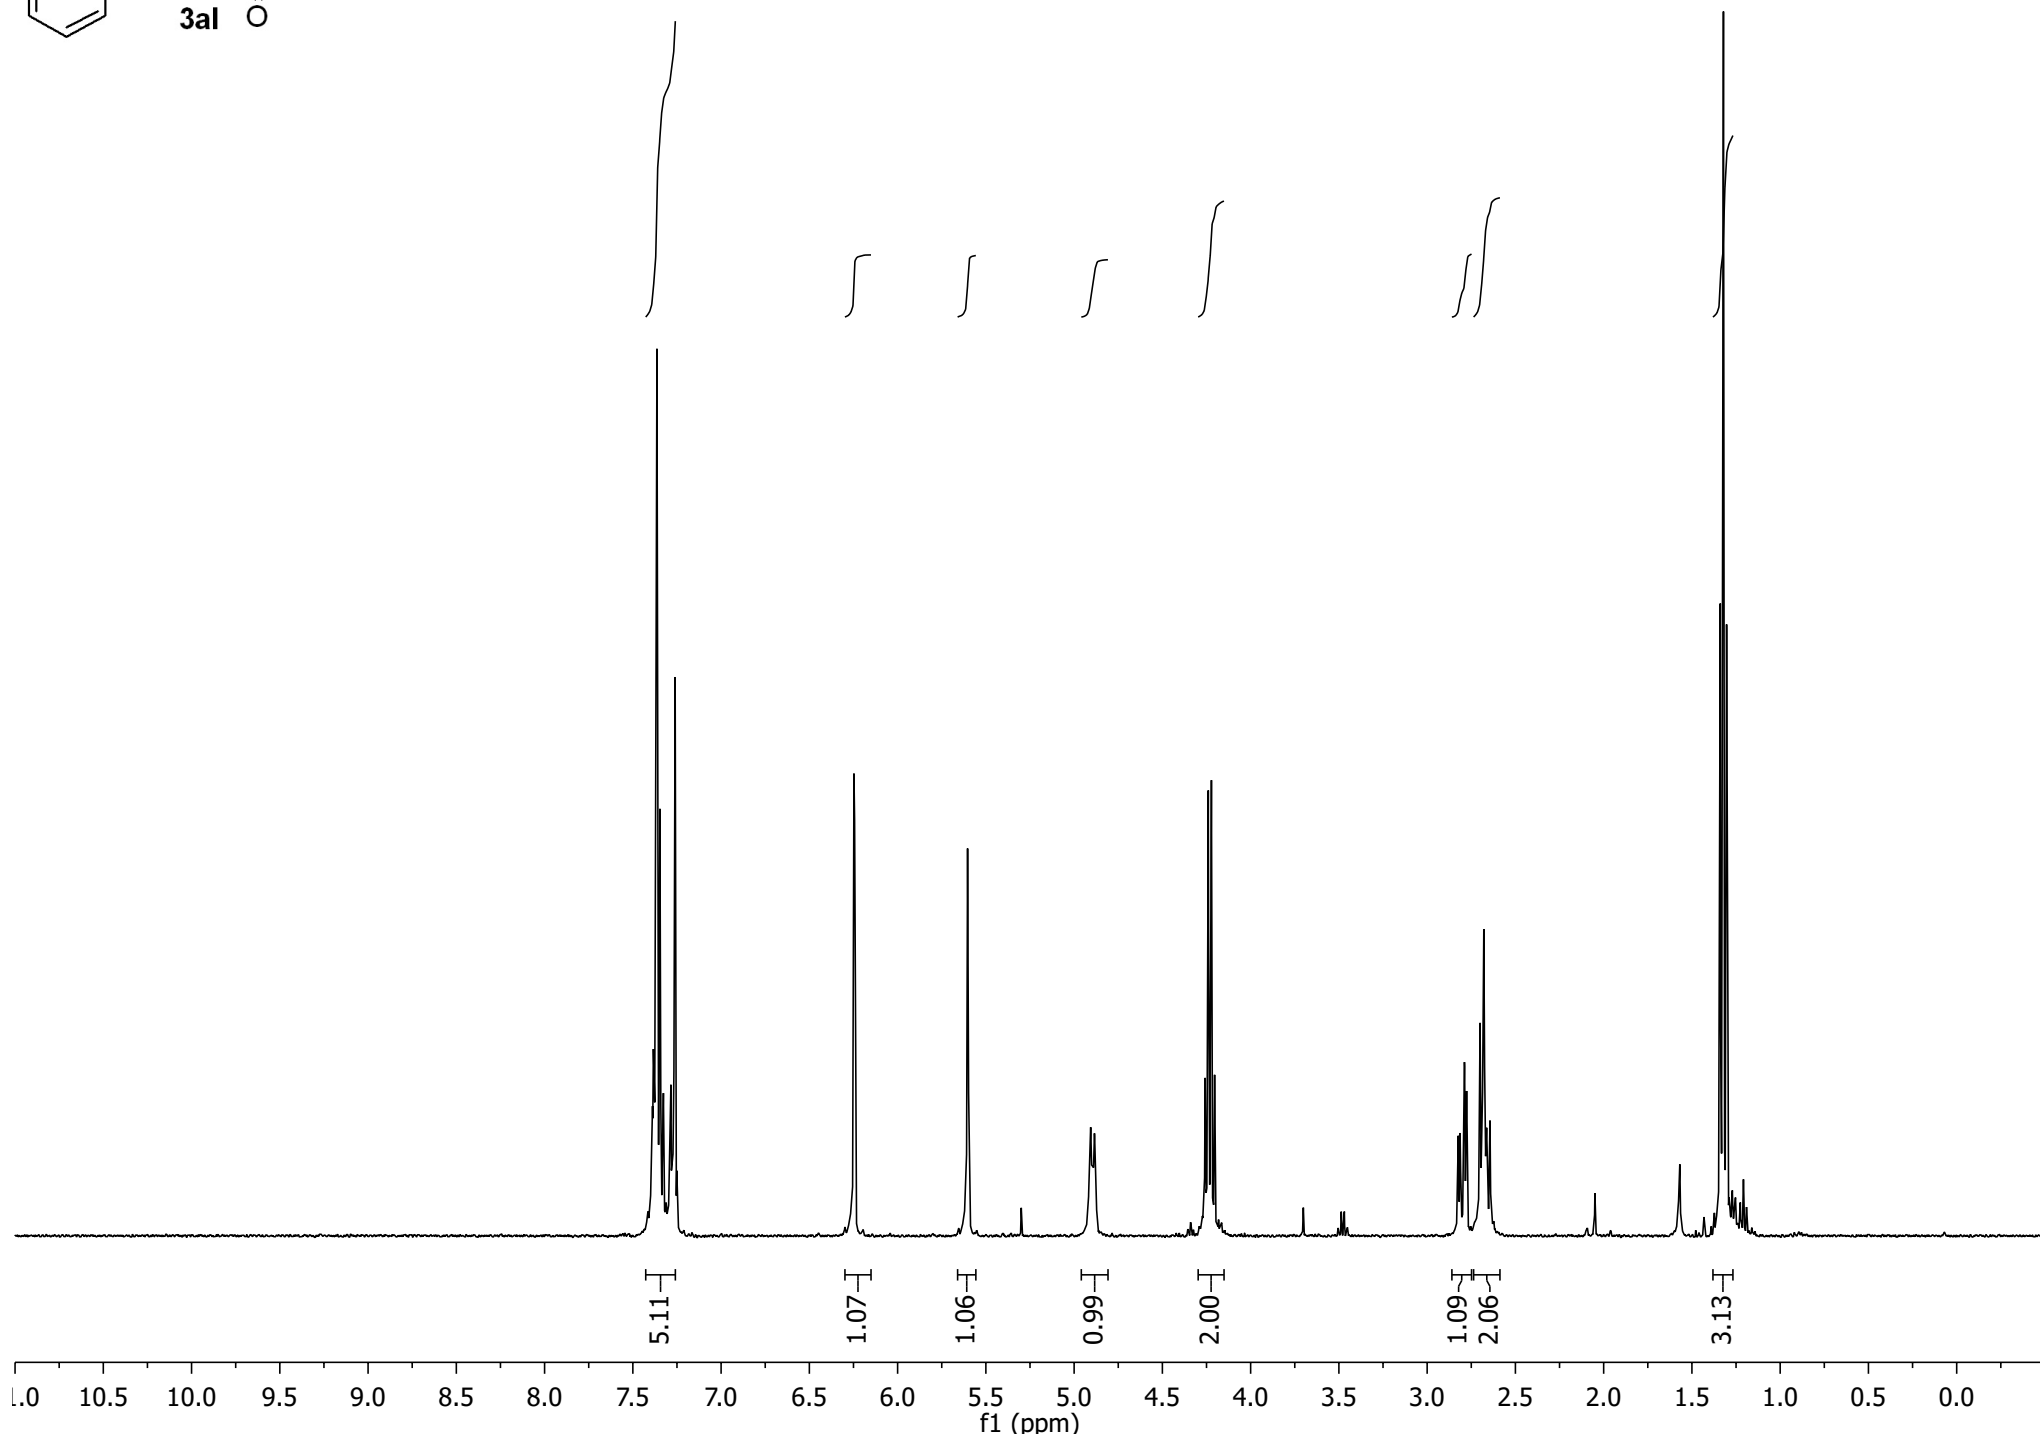

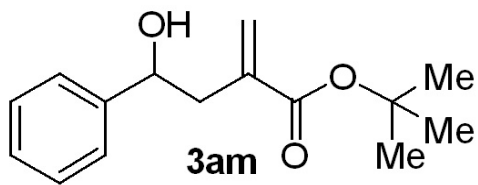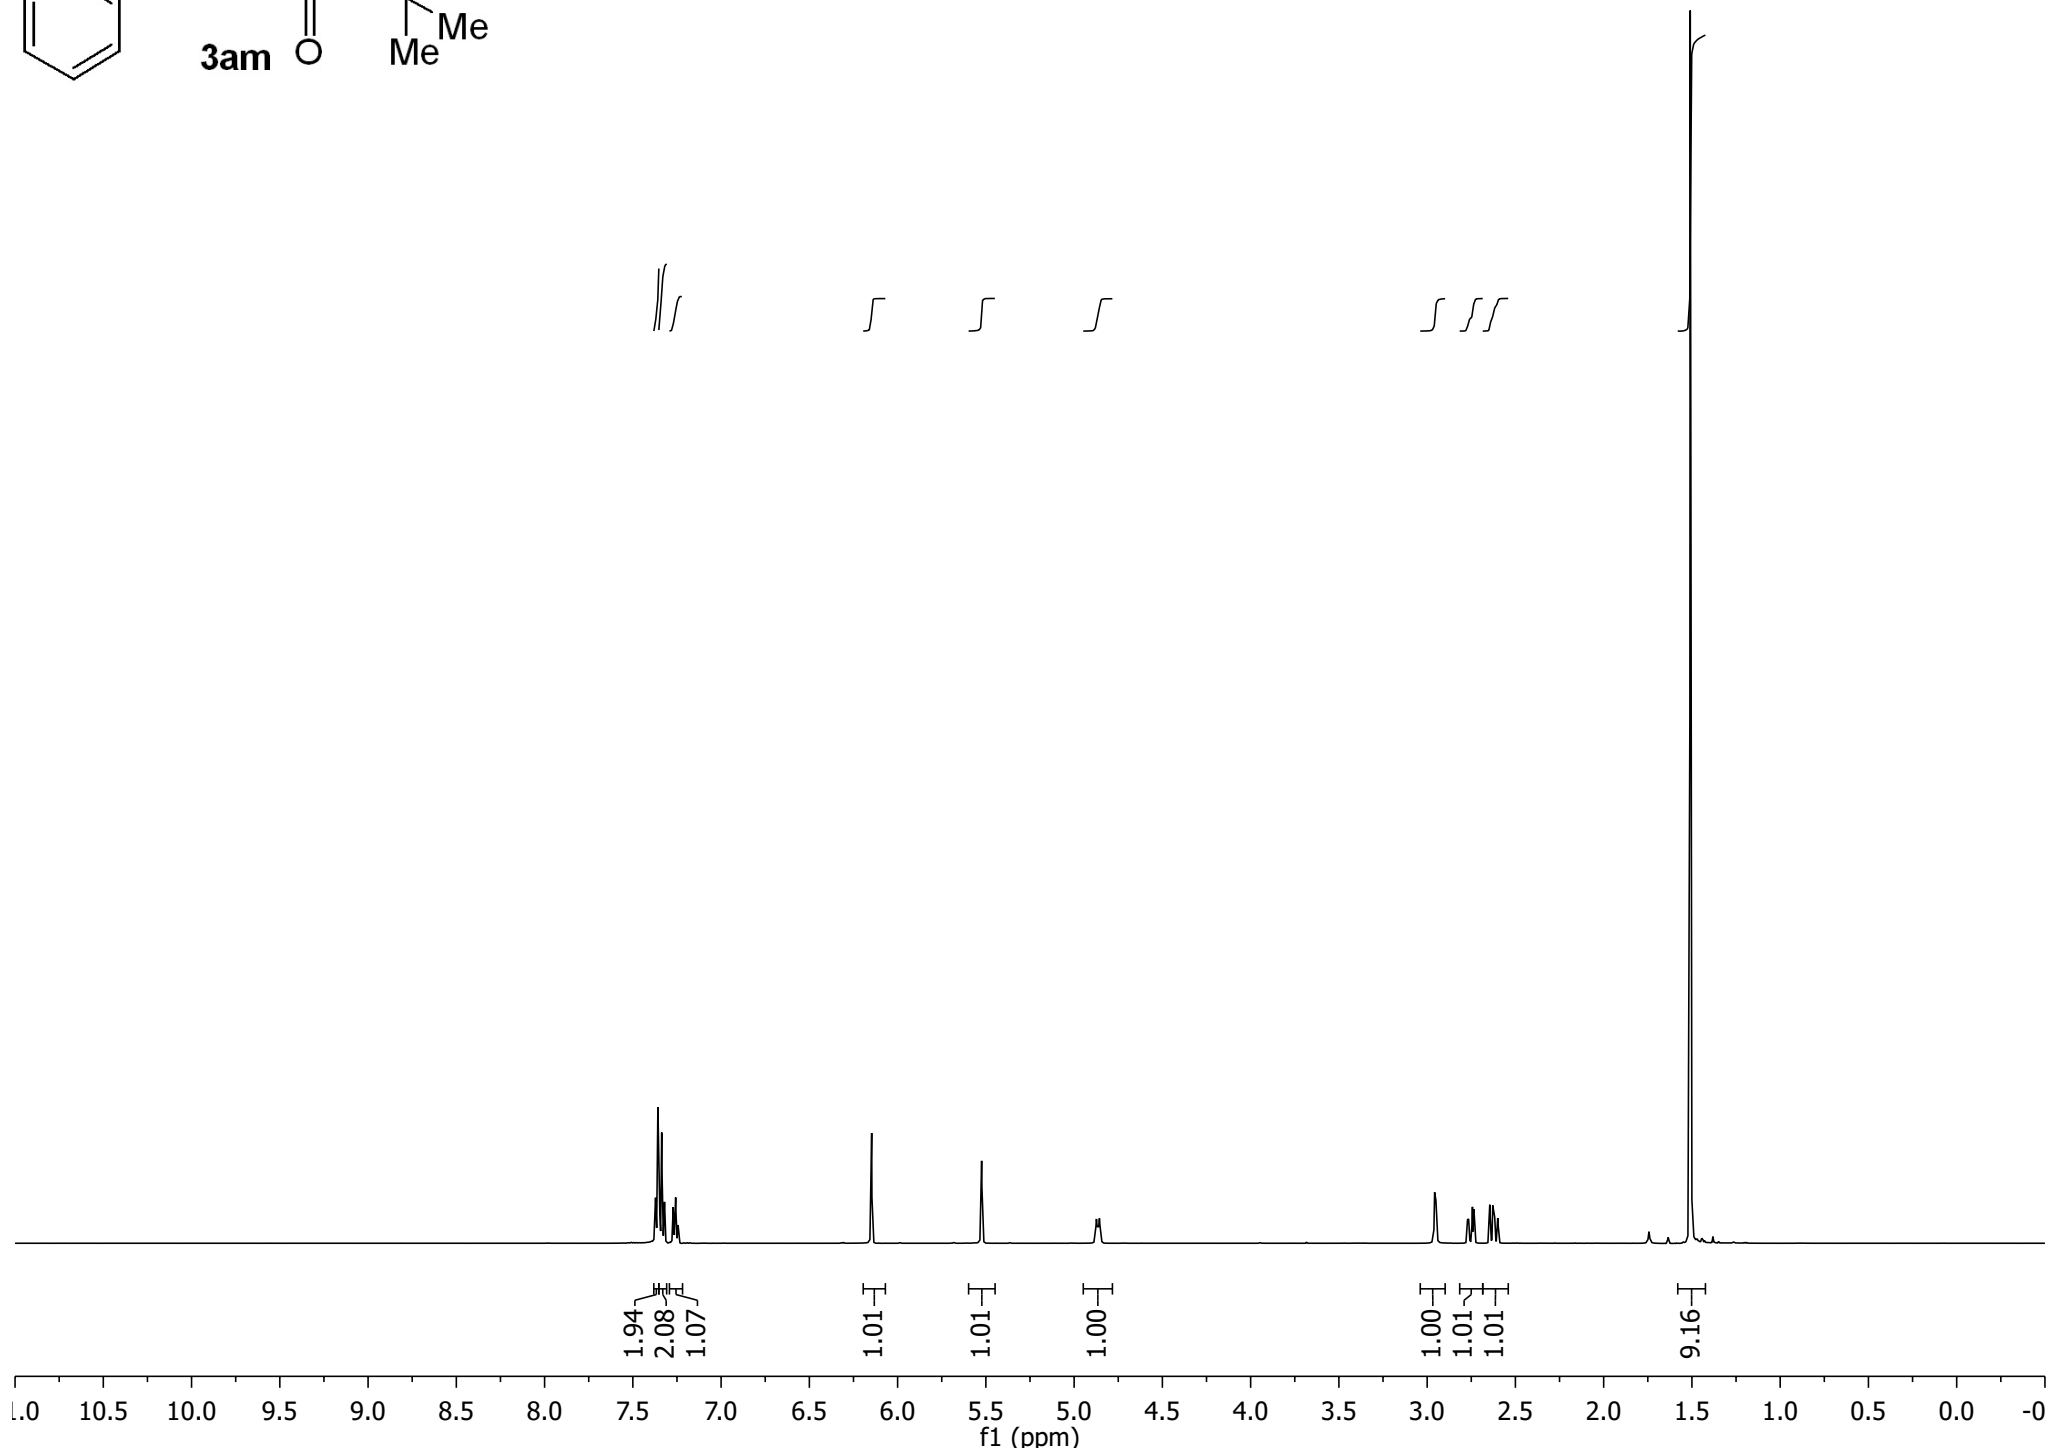



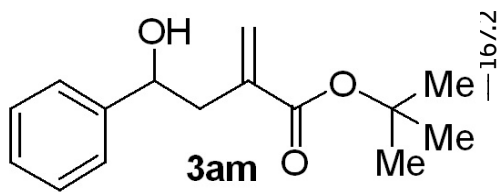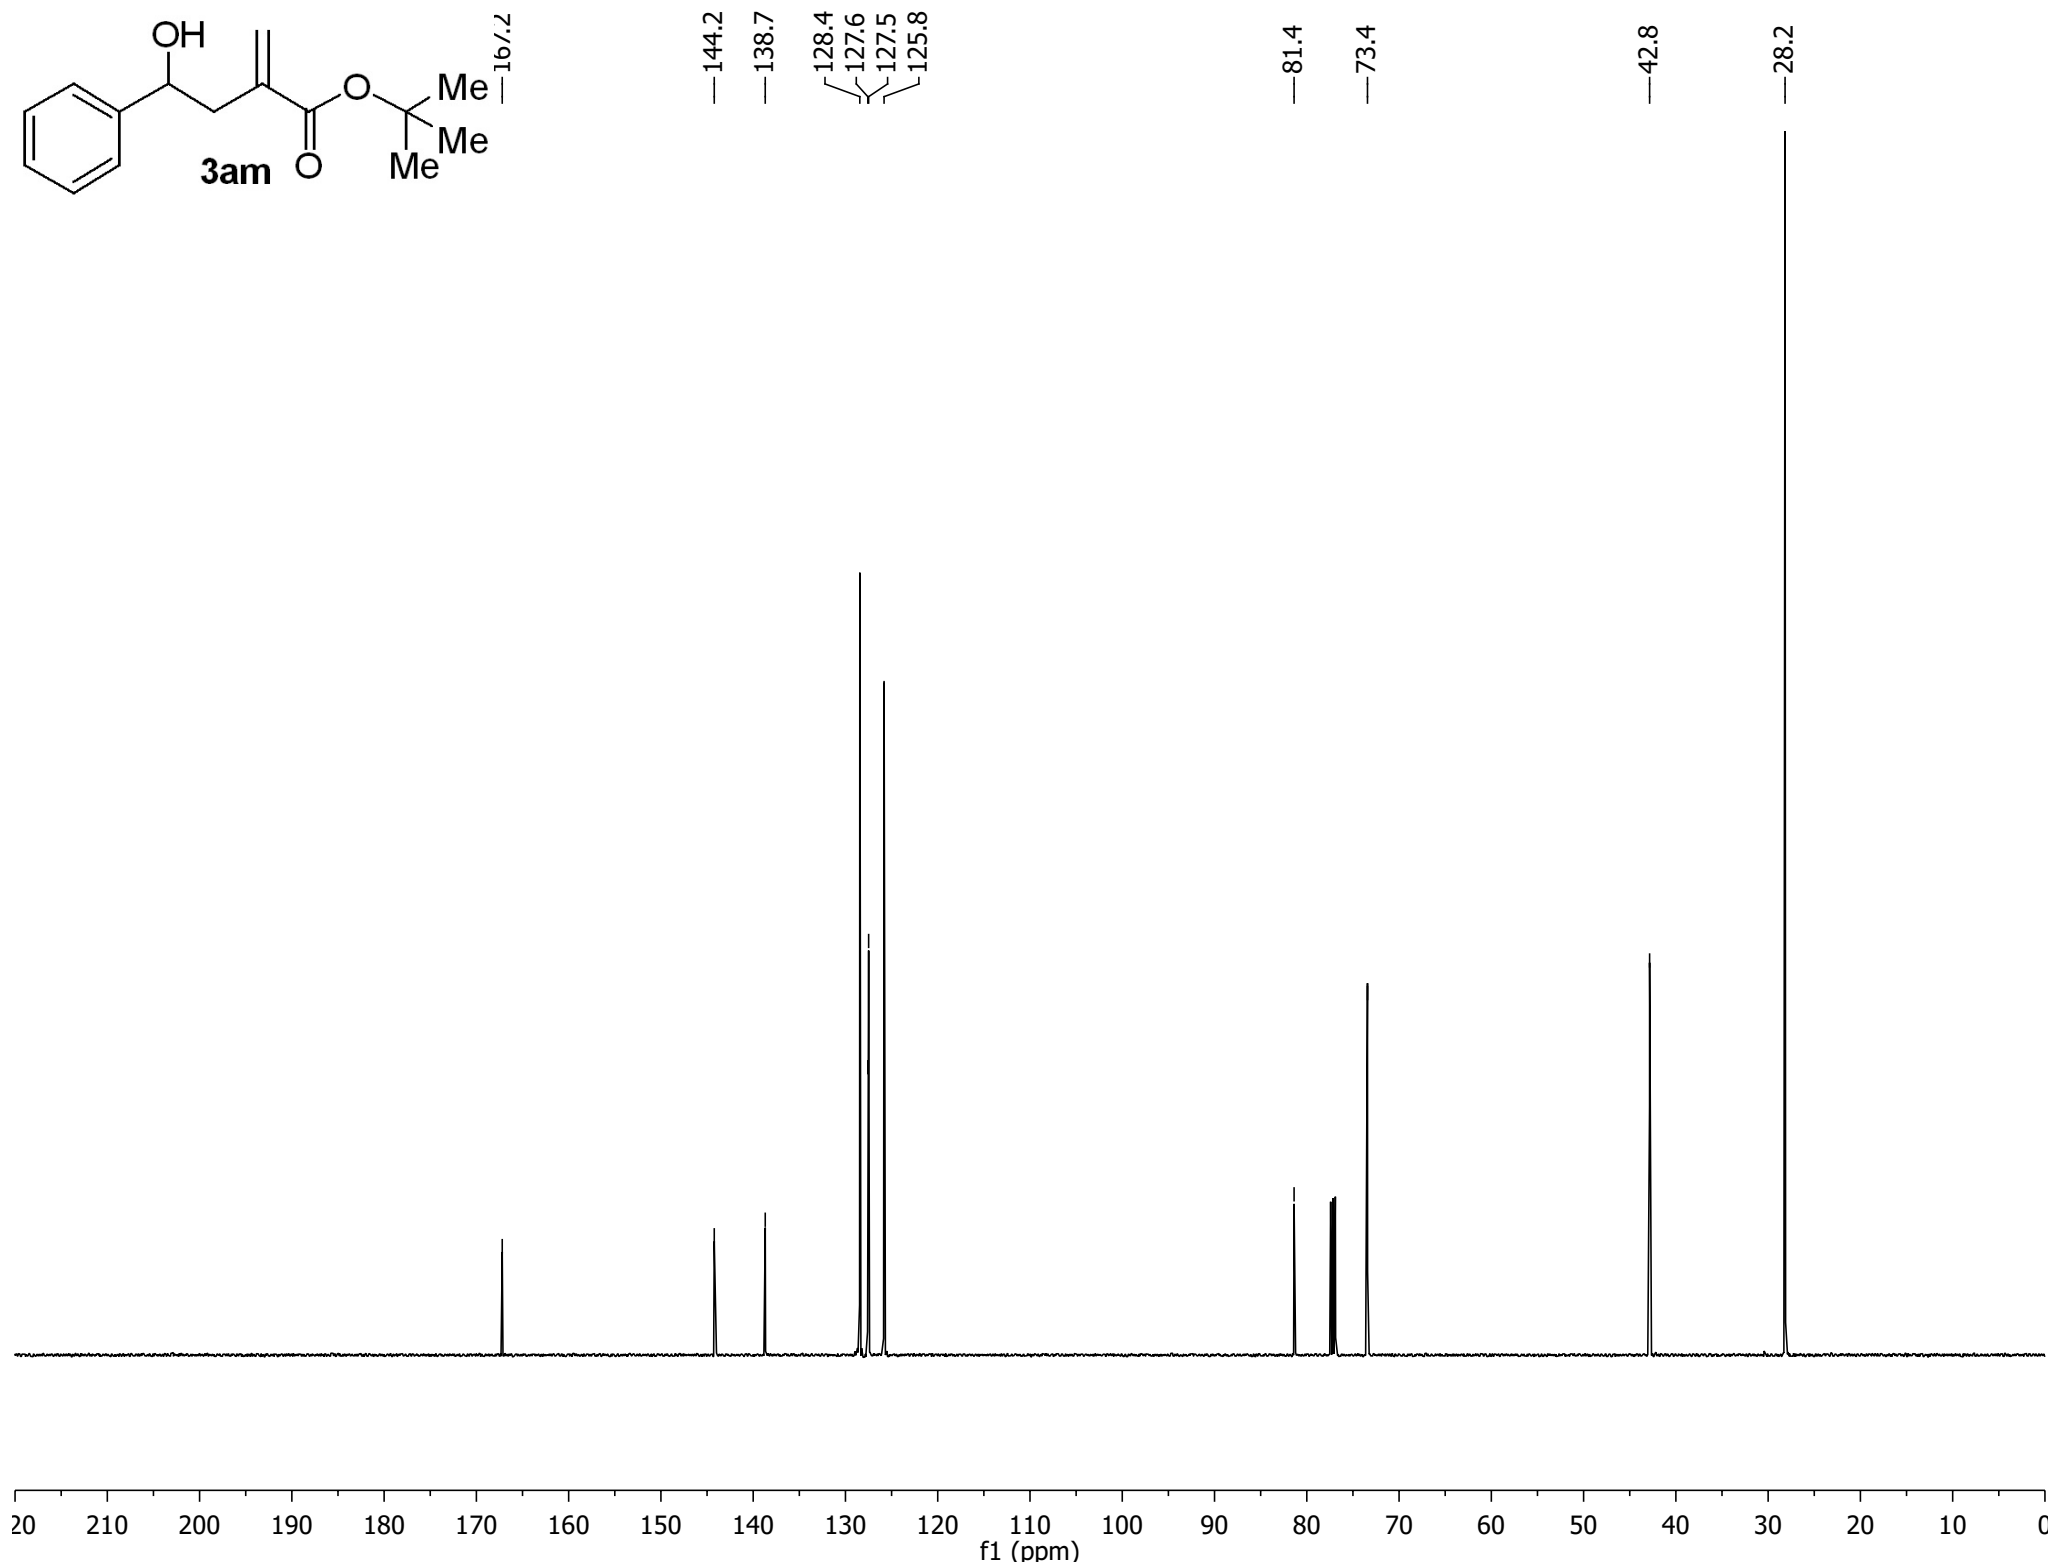

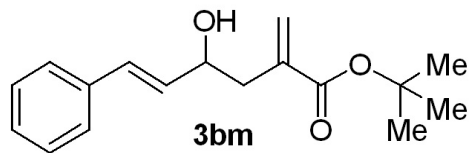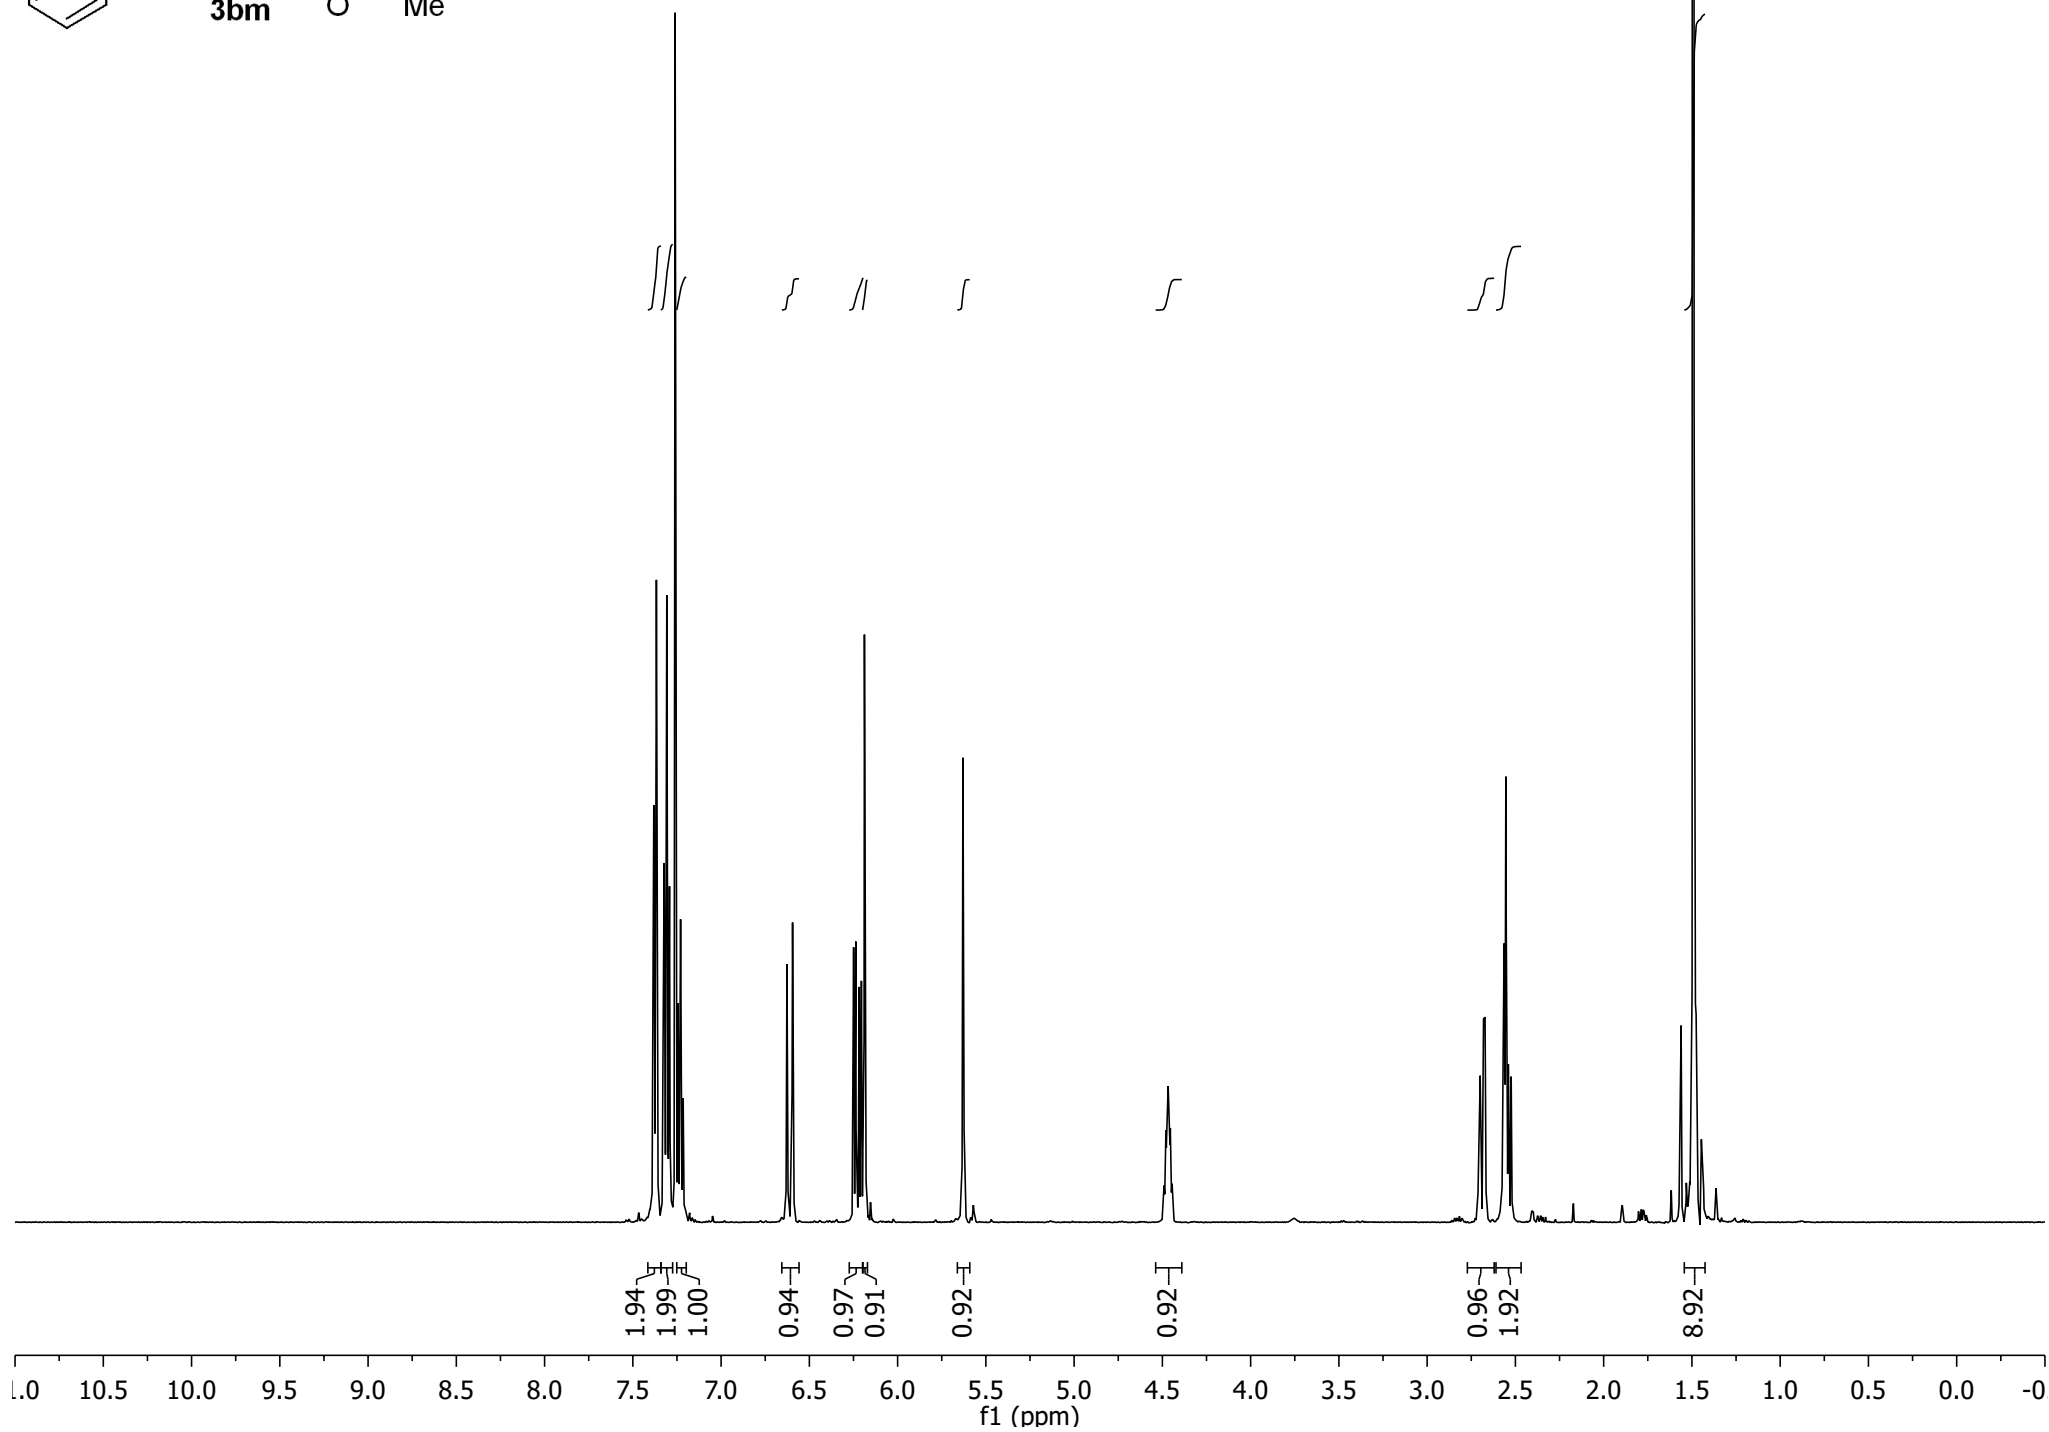

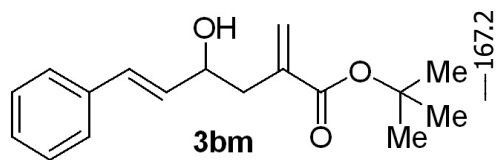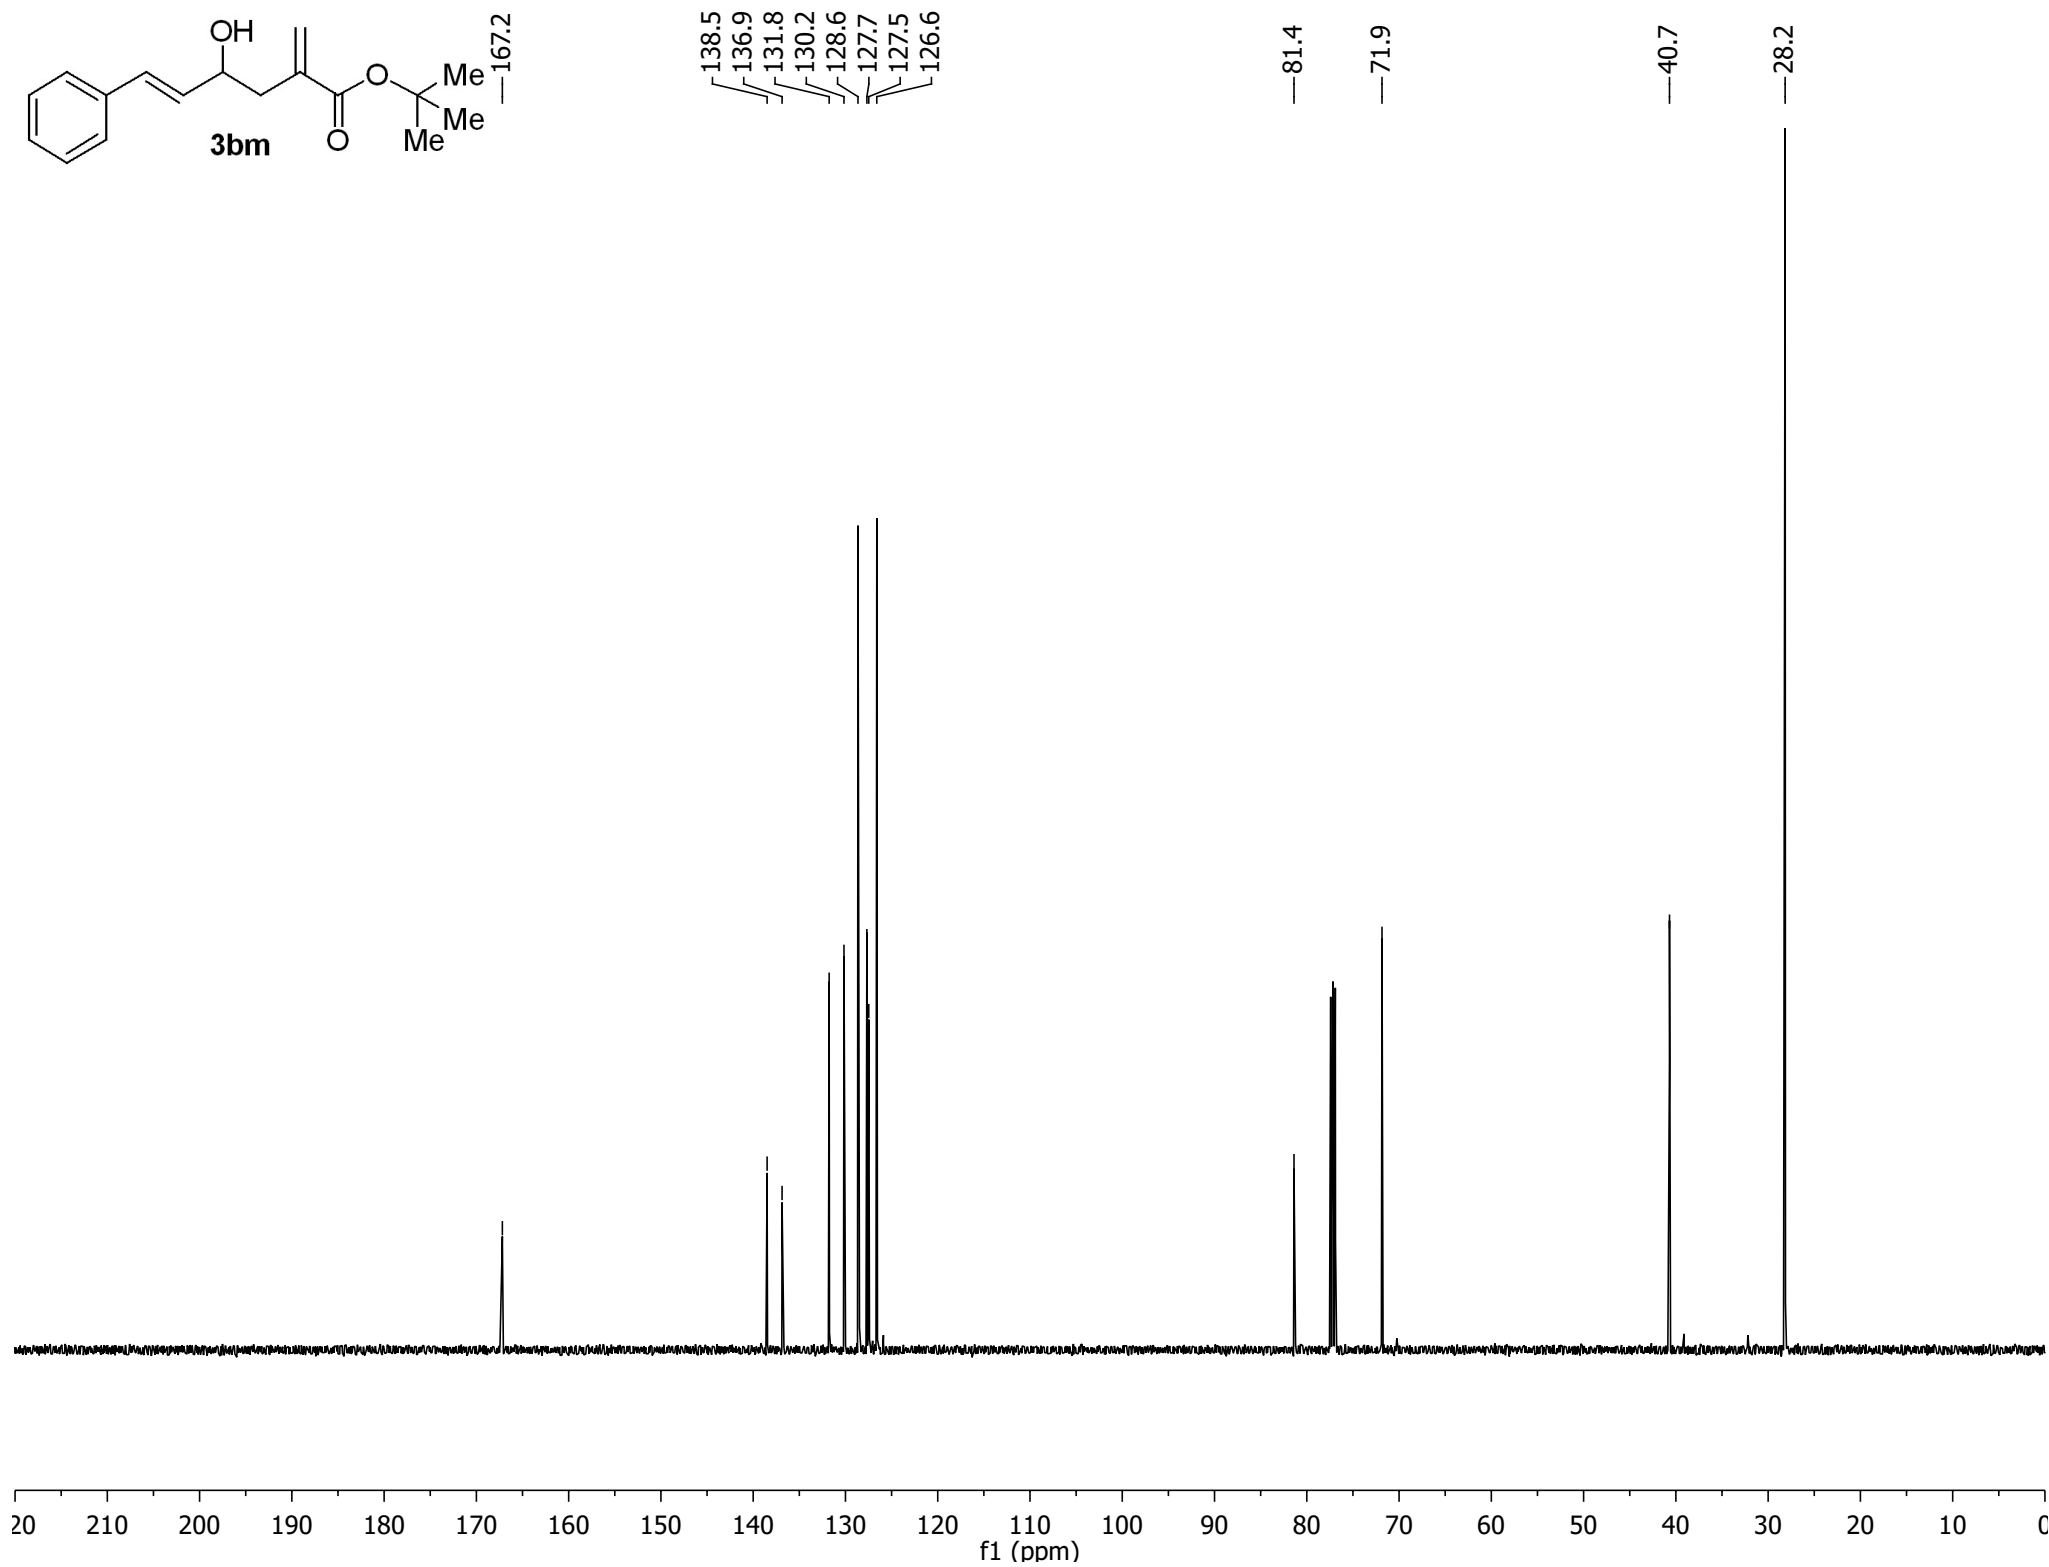

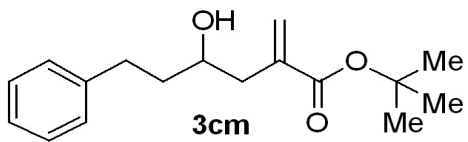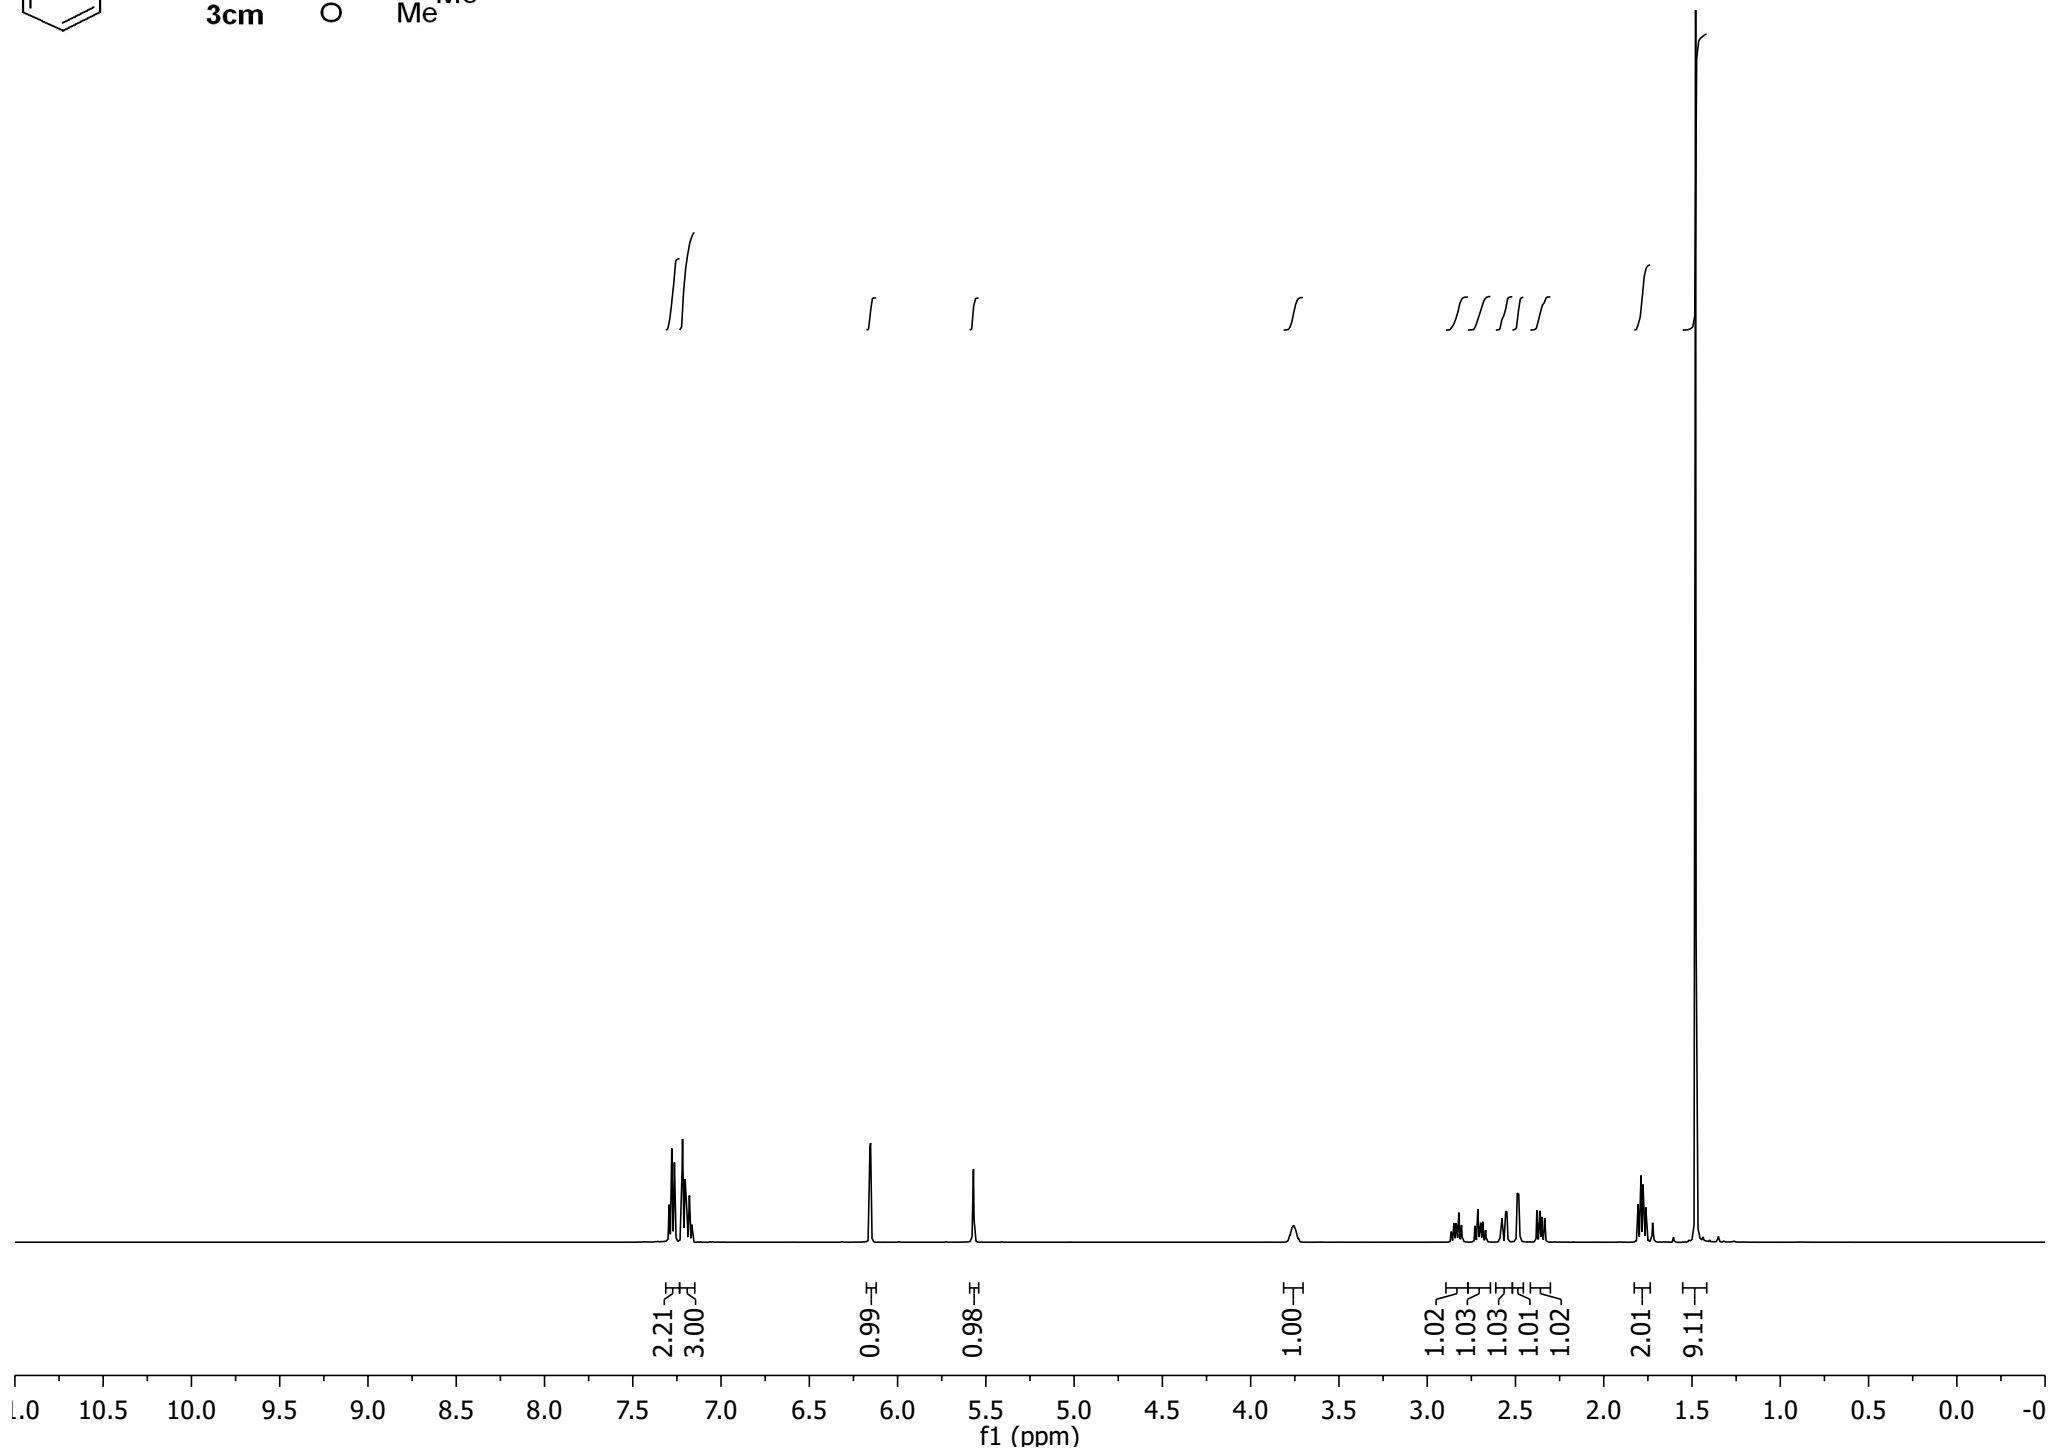

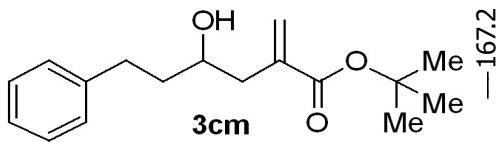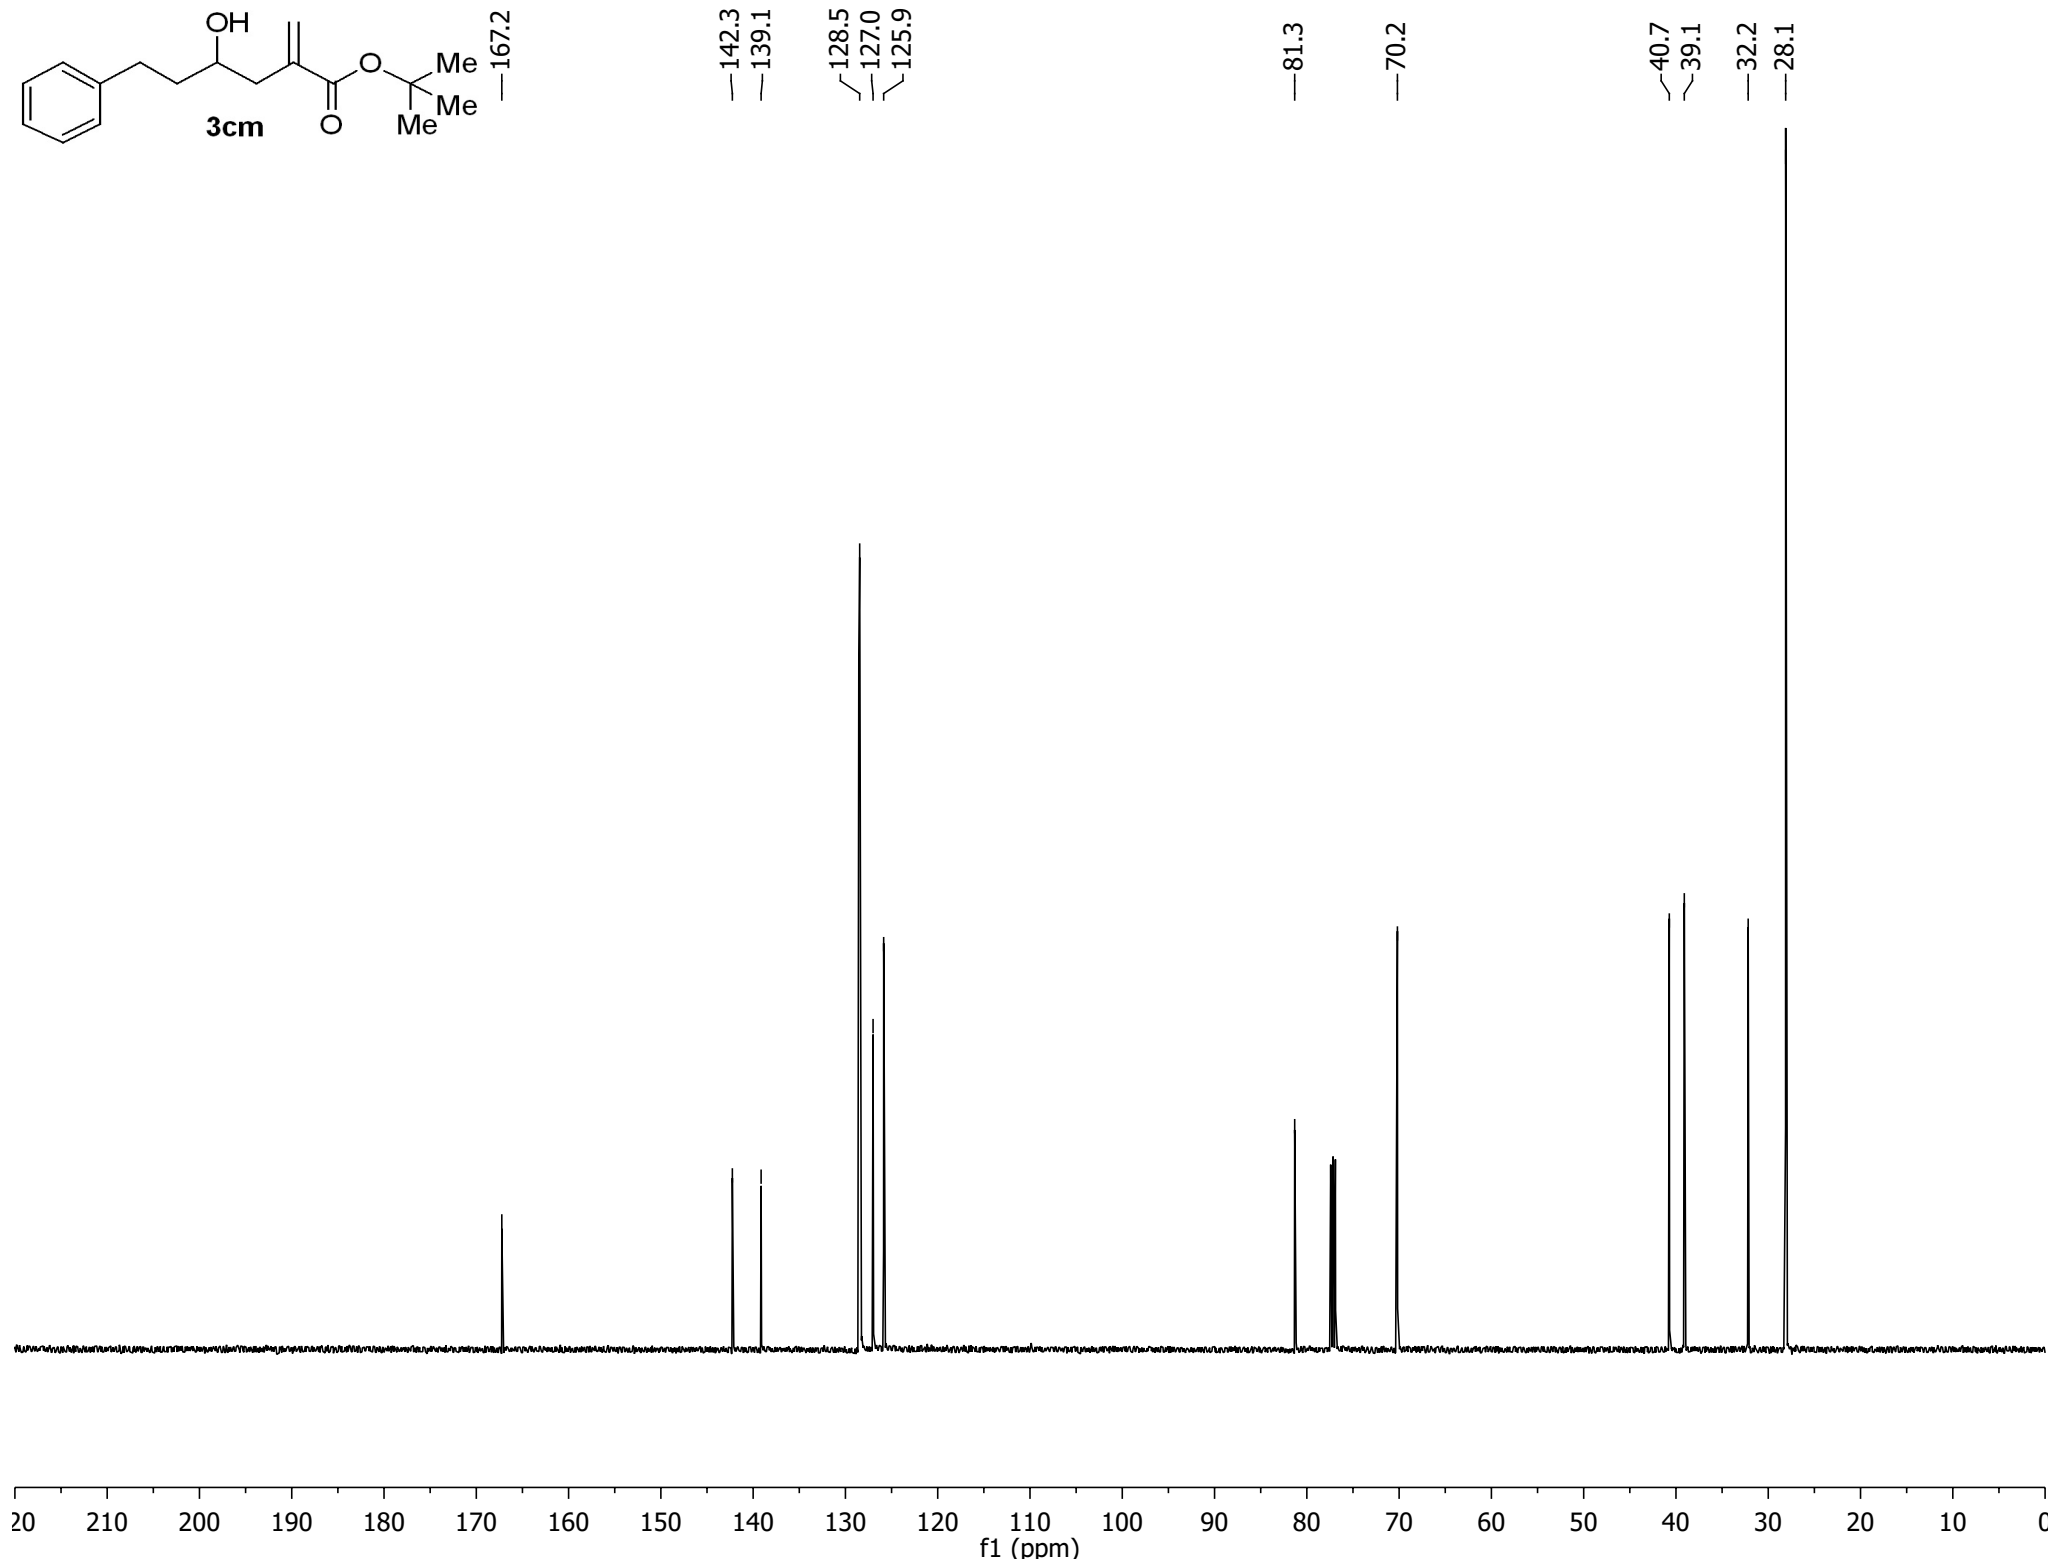

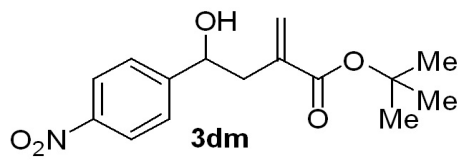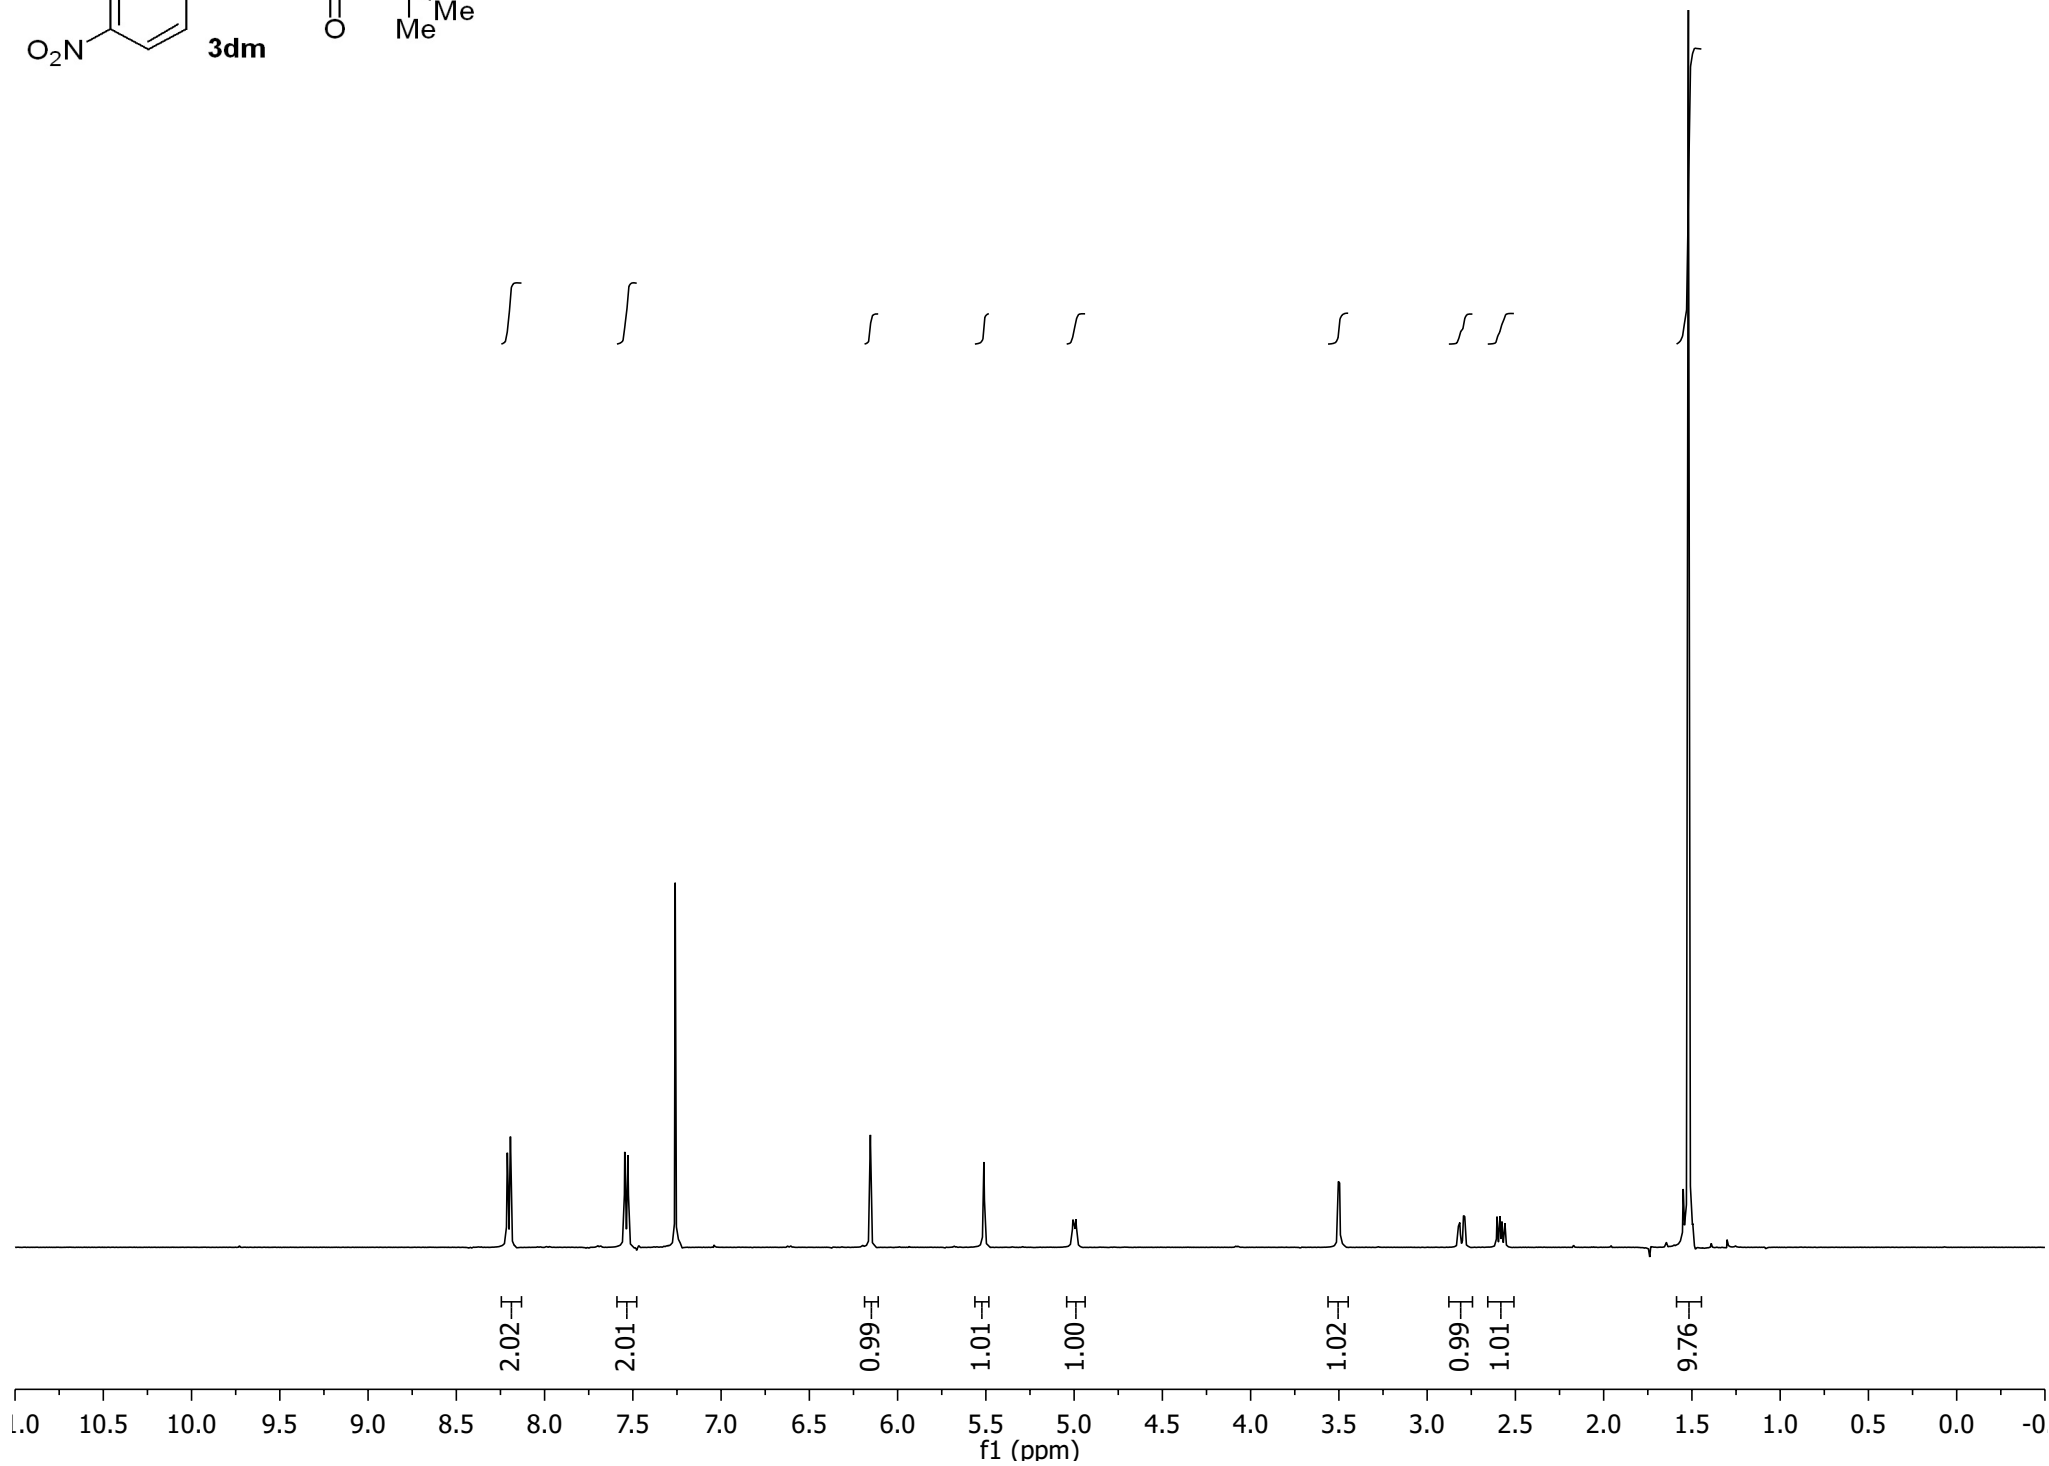

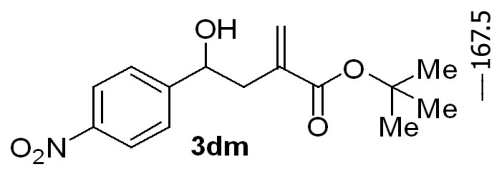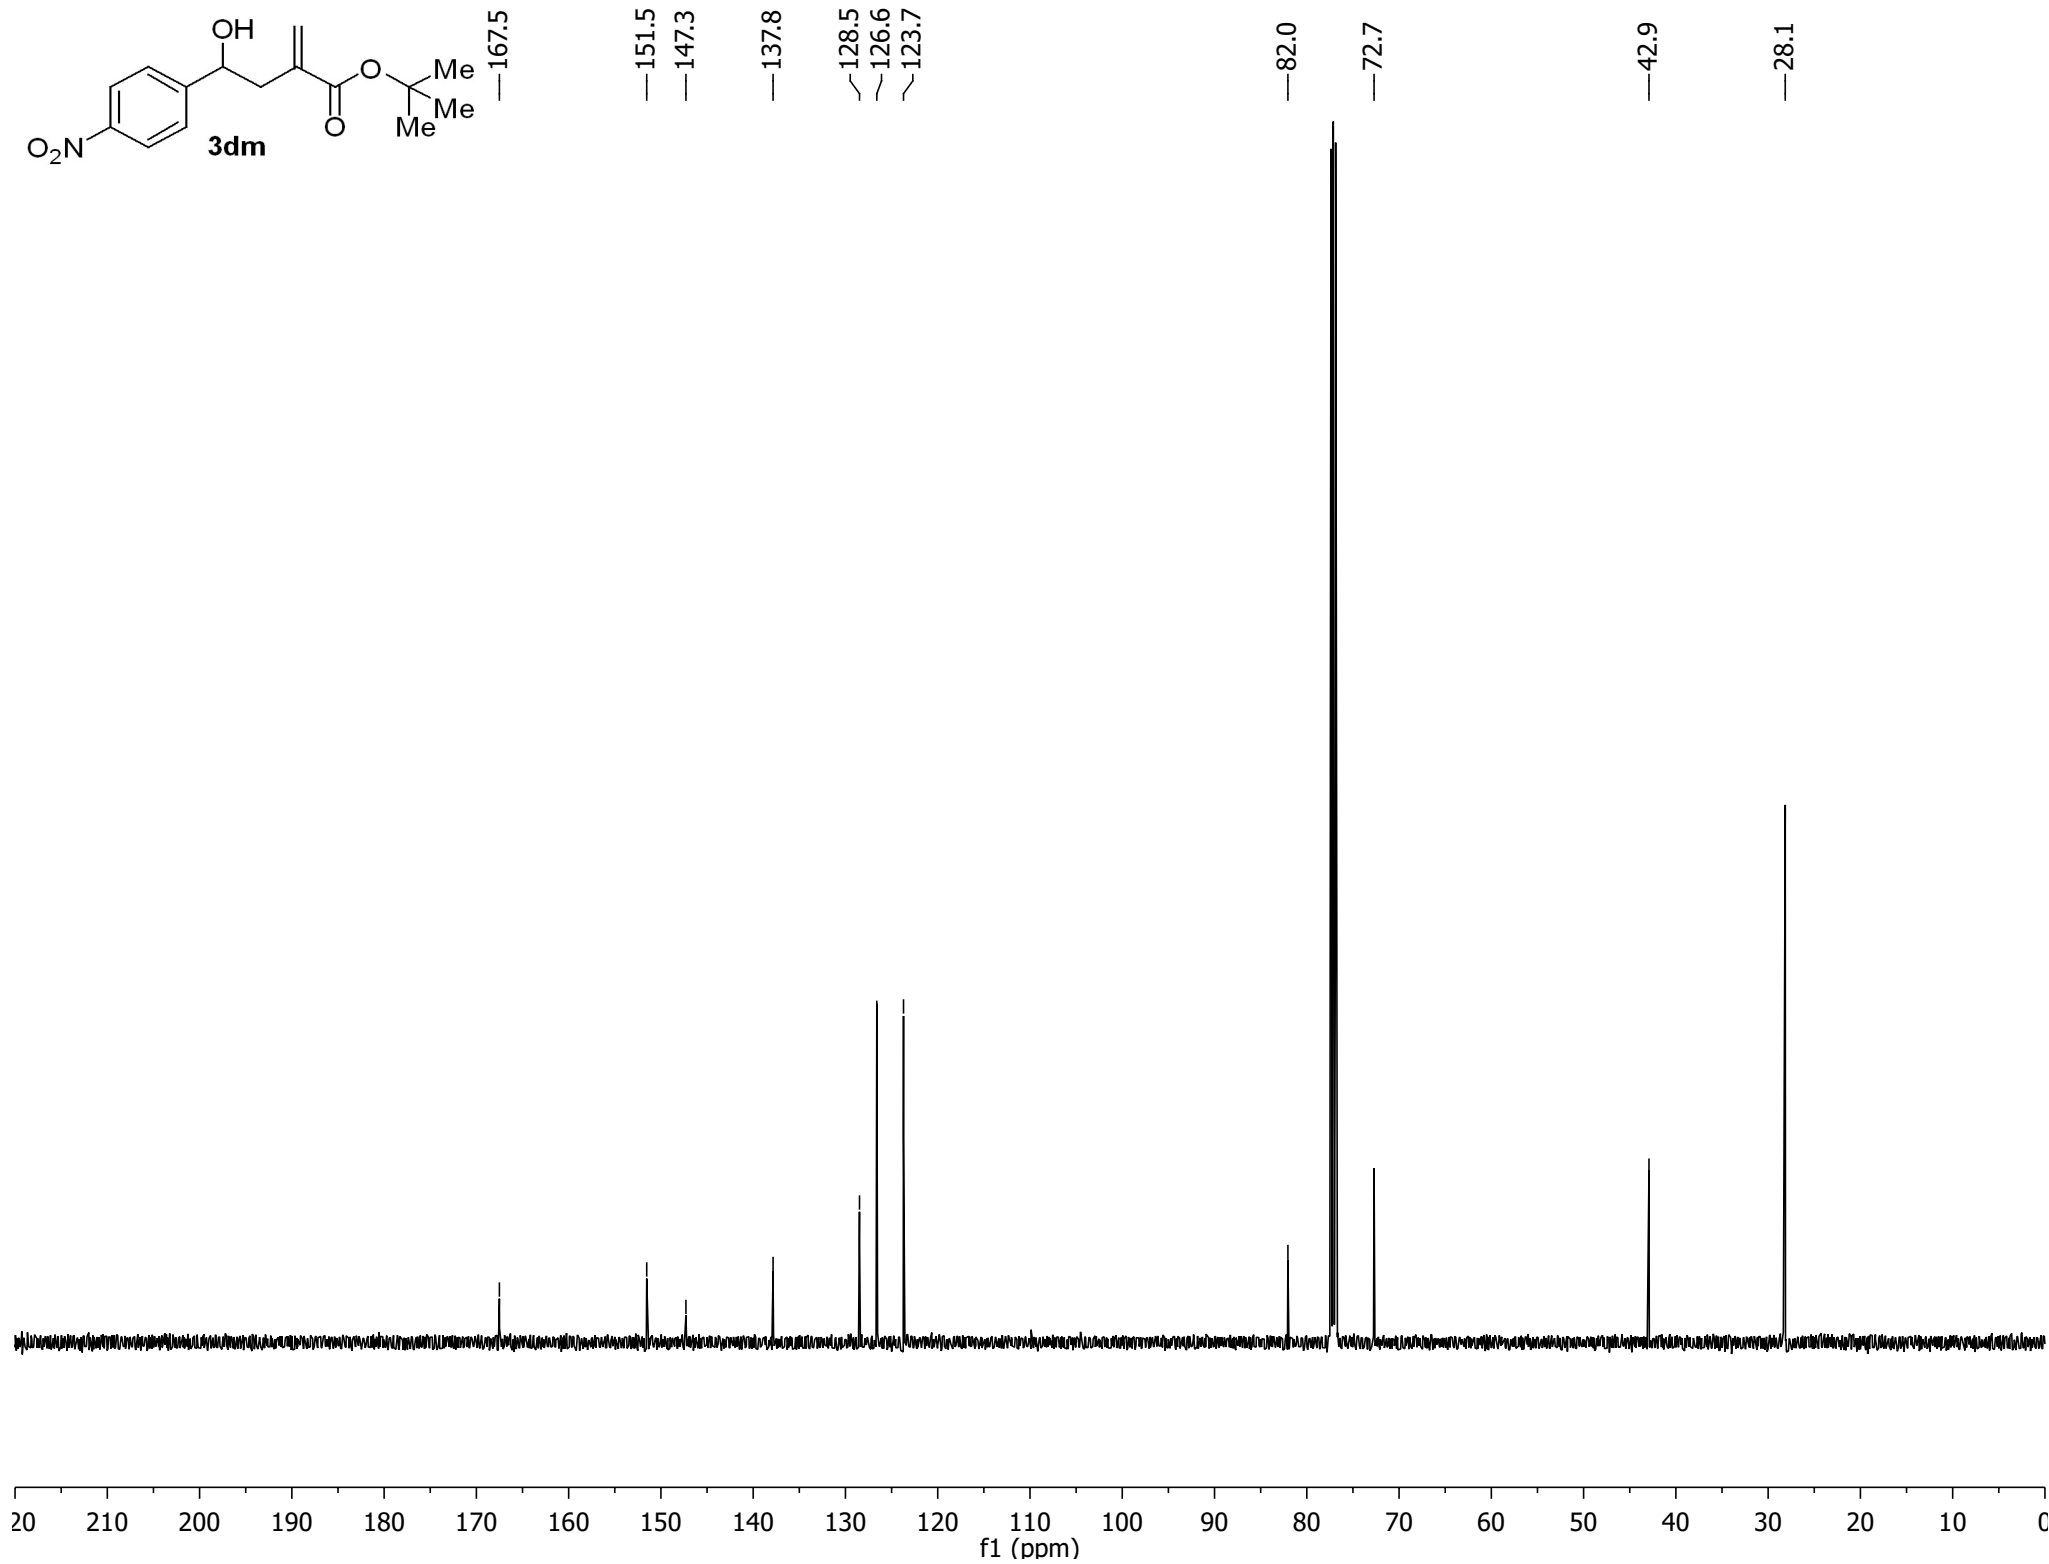

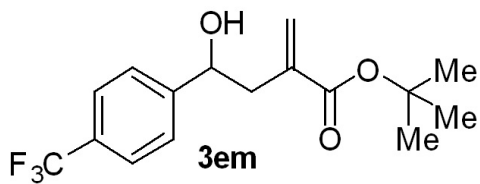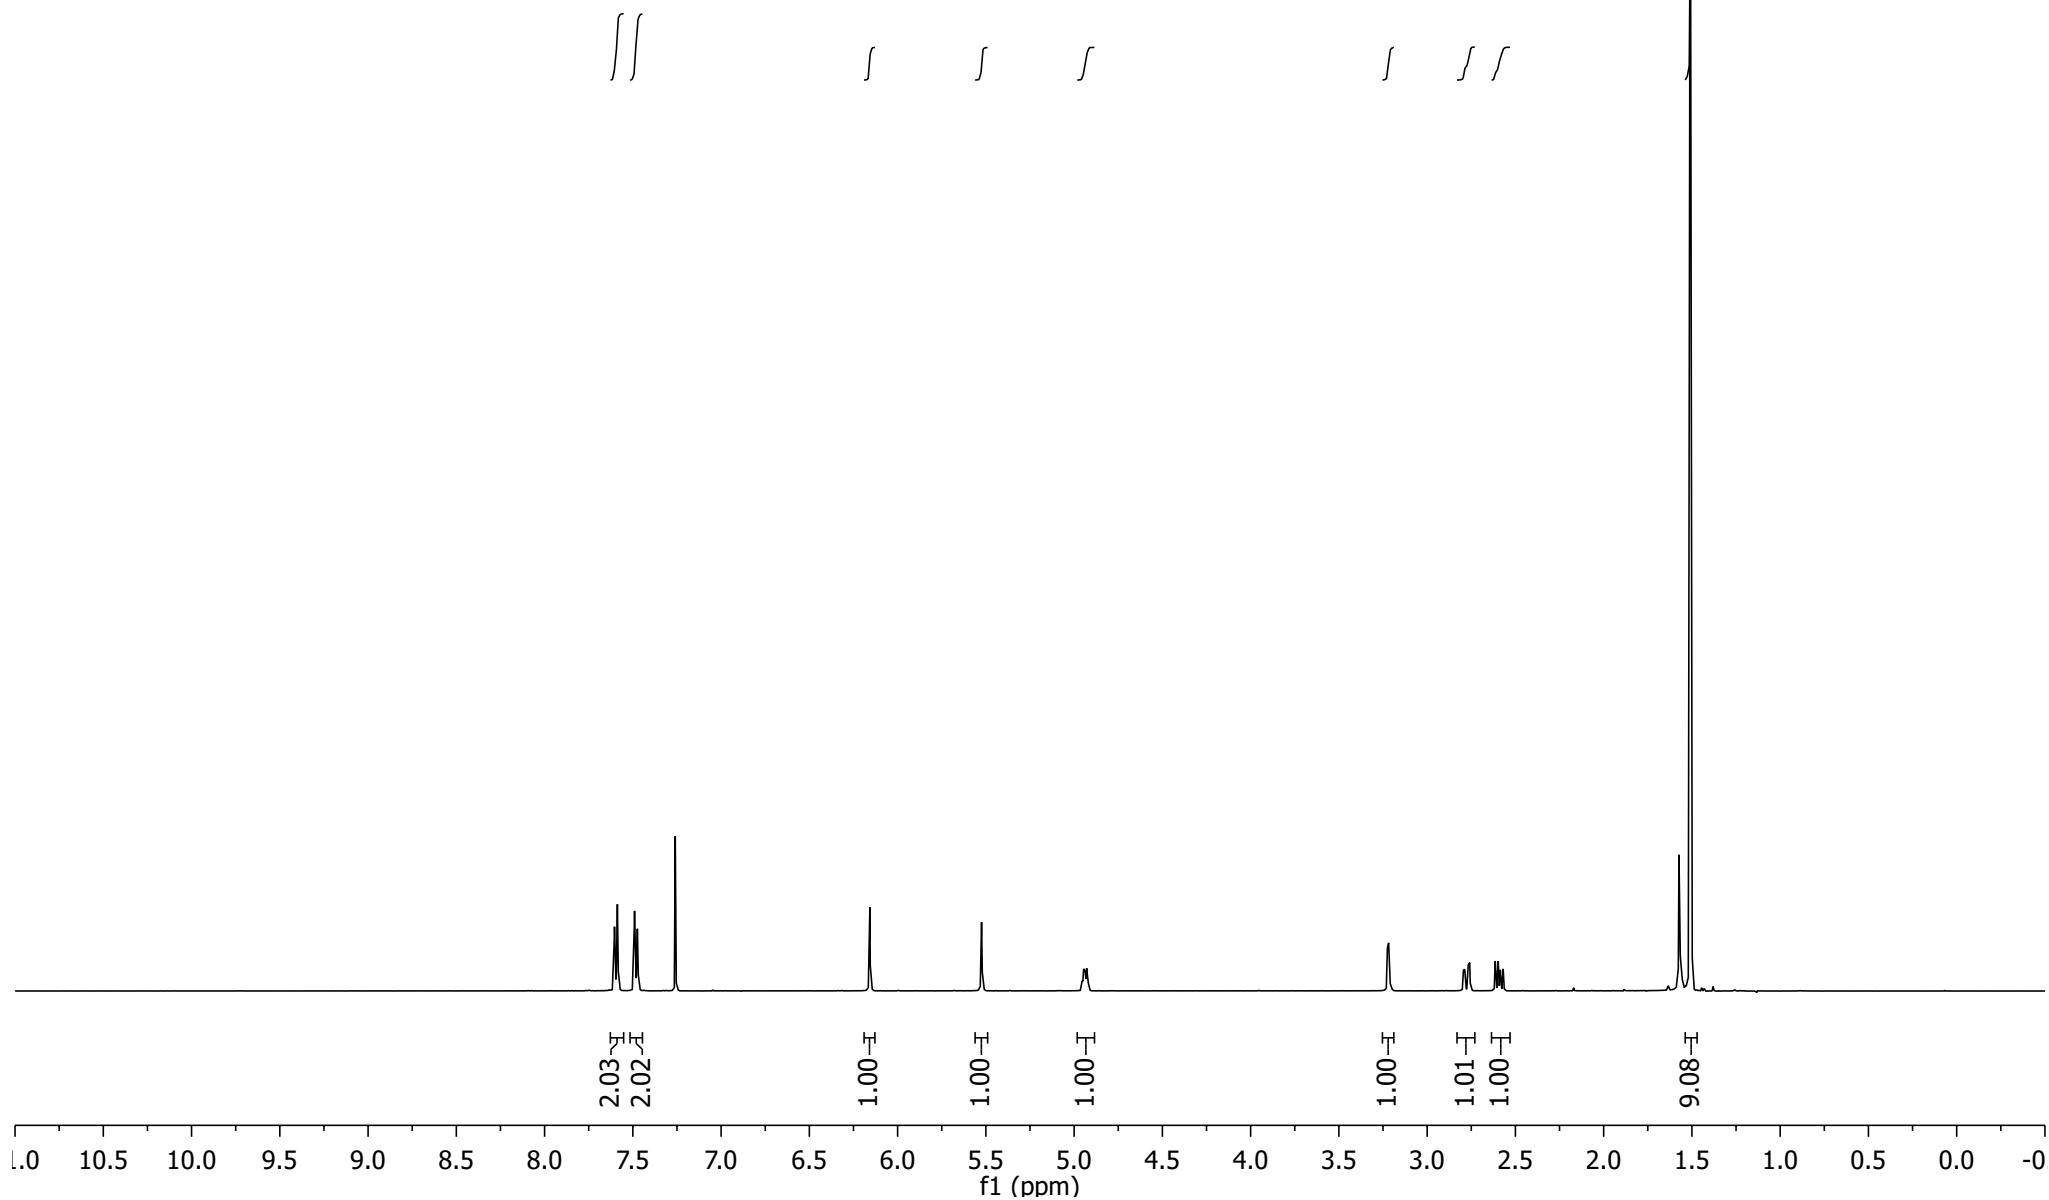



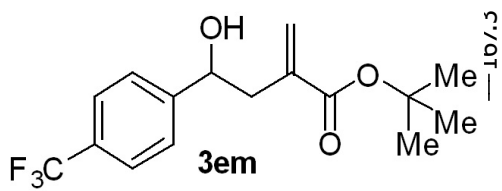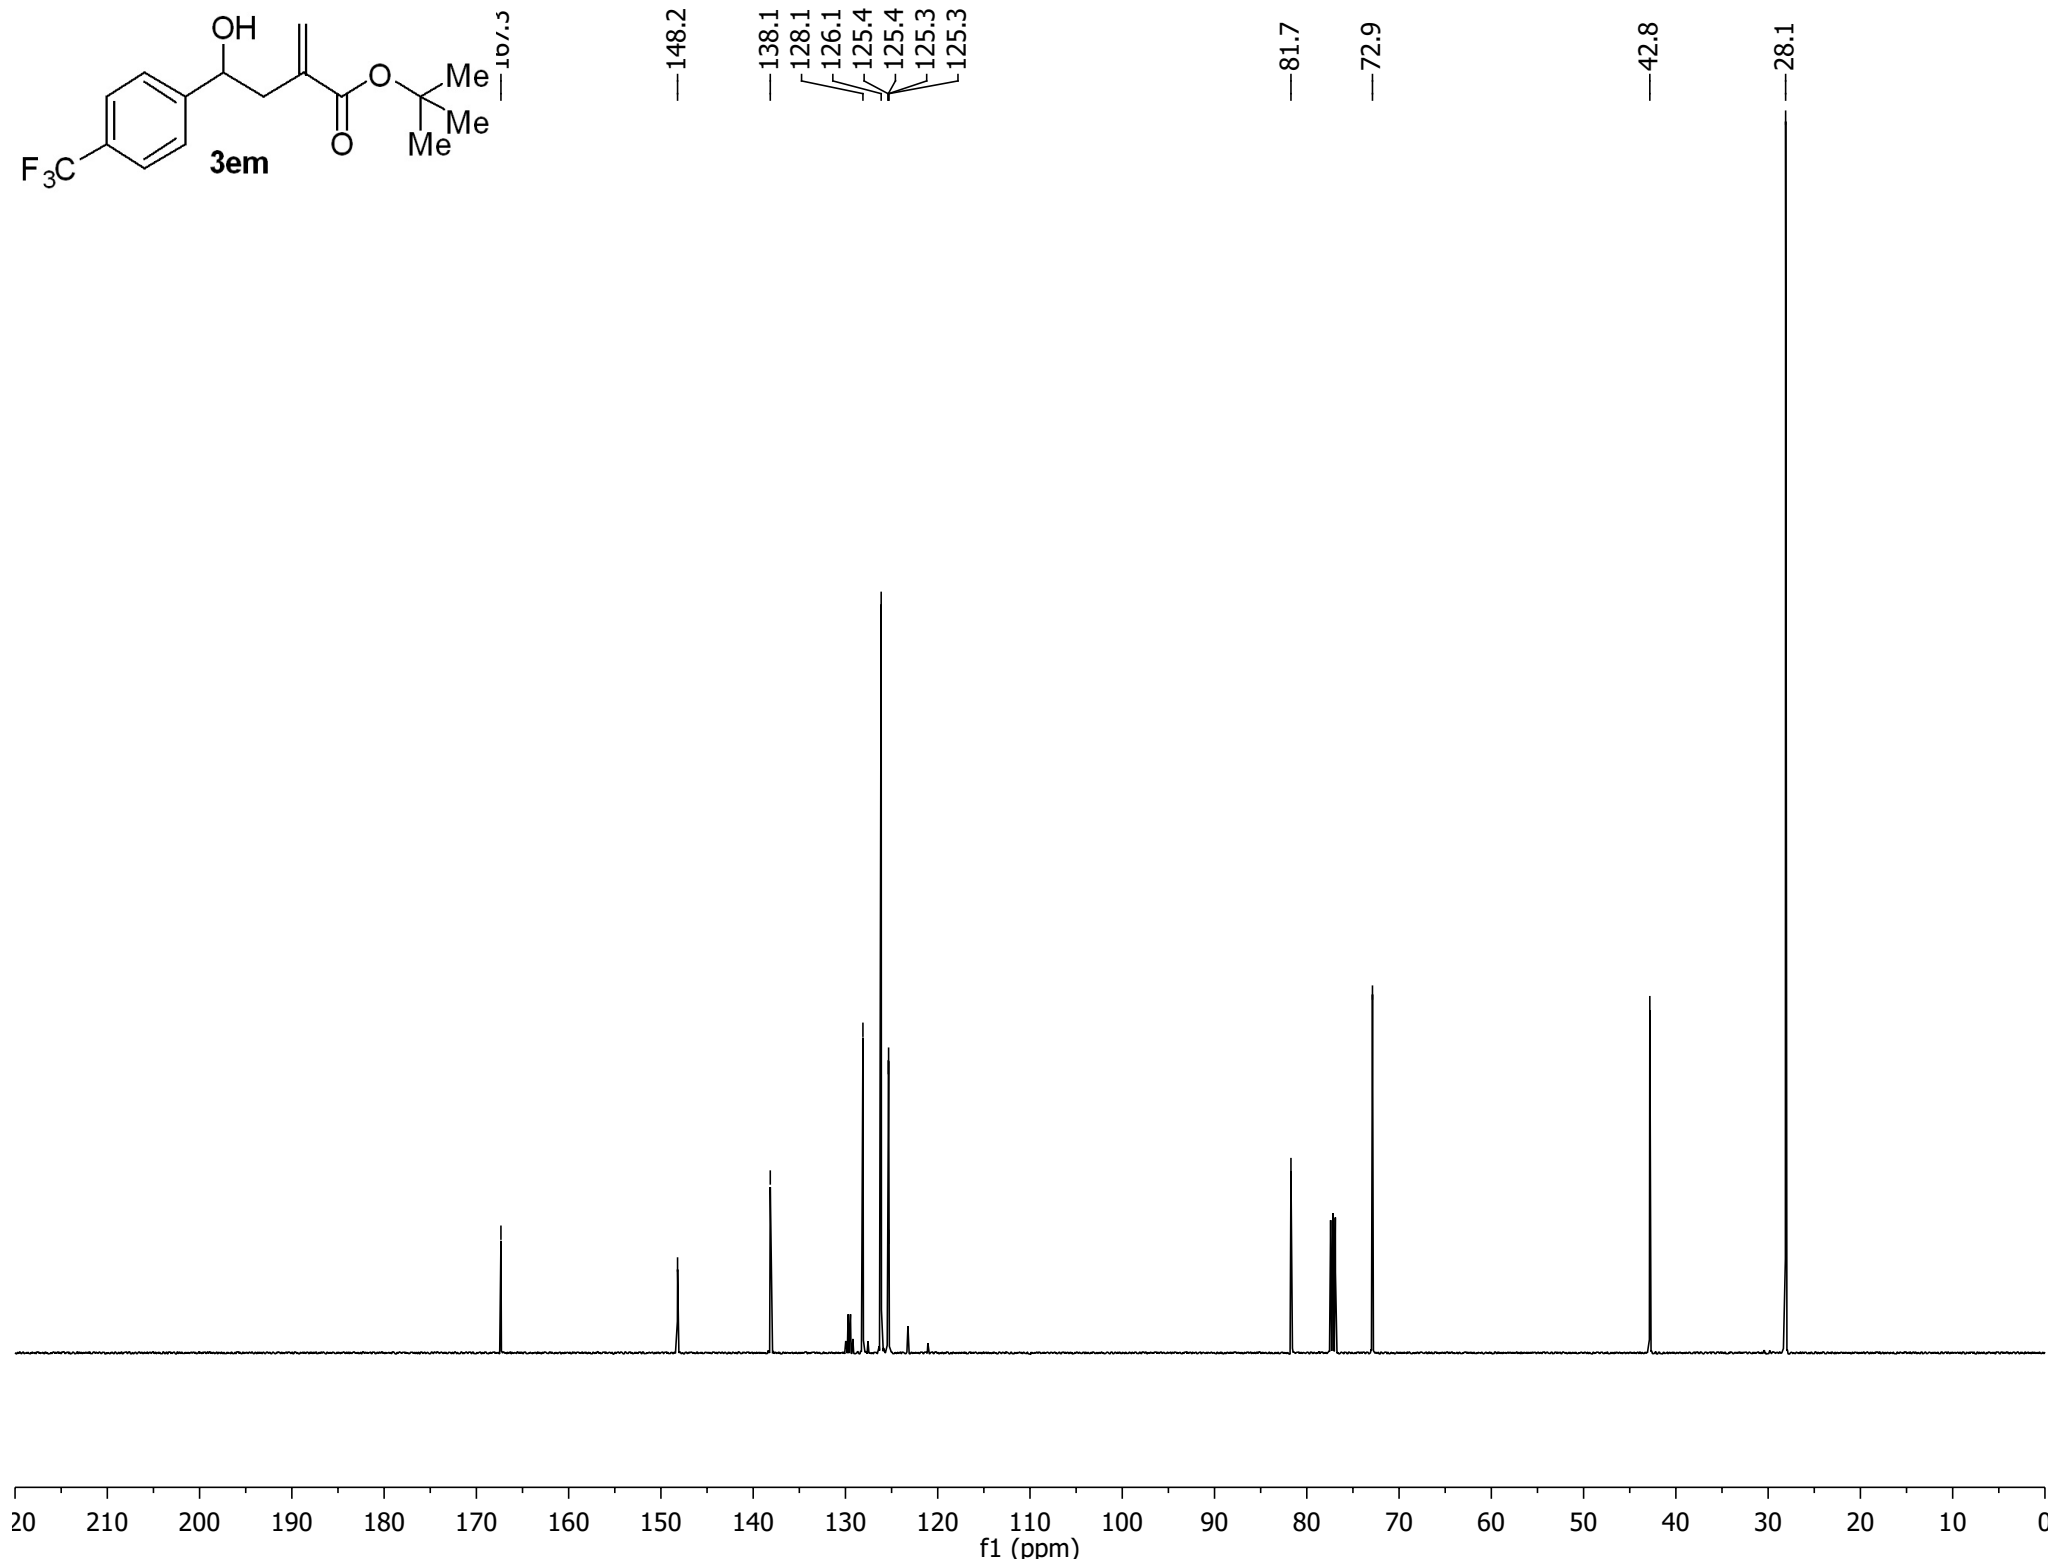

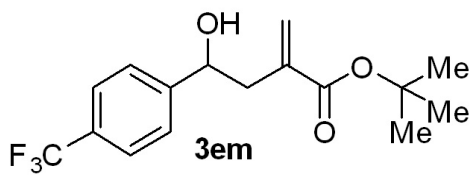

External  $\text{BF}_3 \cdot \text{OEt}_2$  standard

---62.9

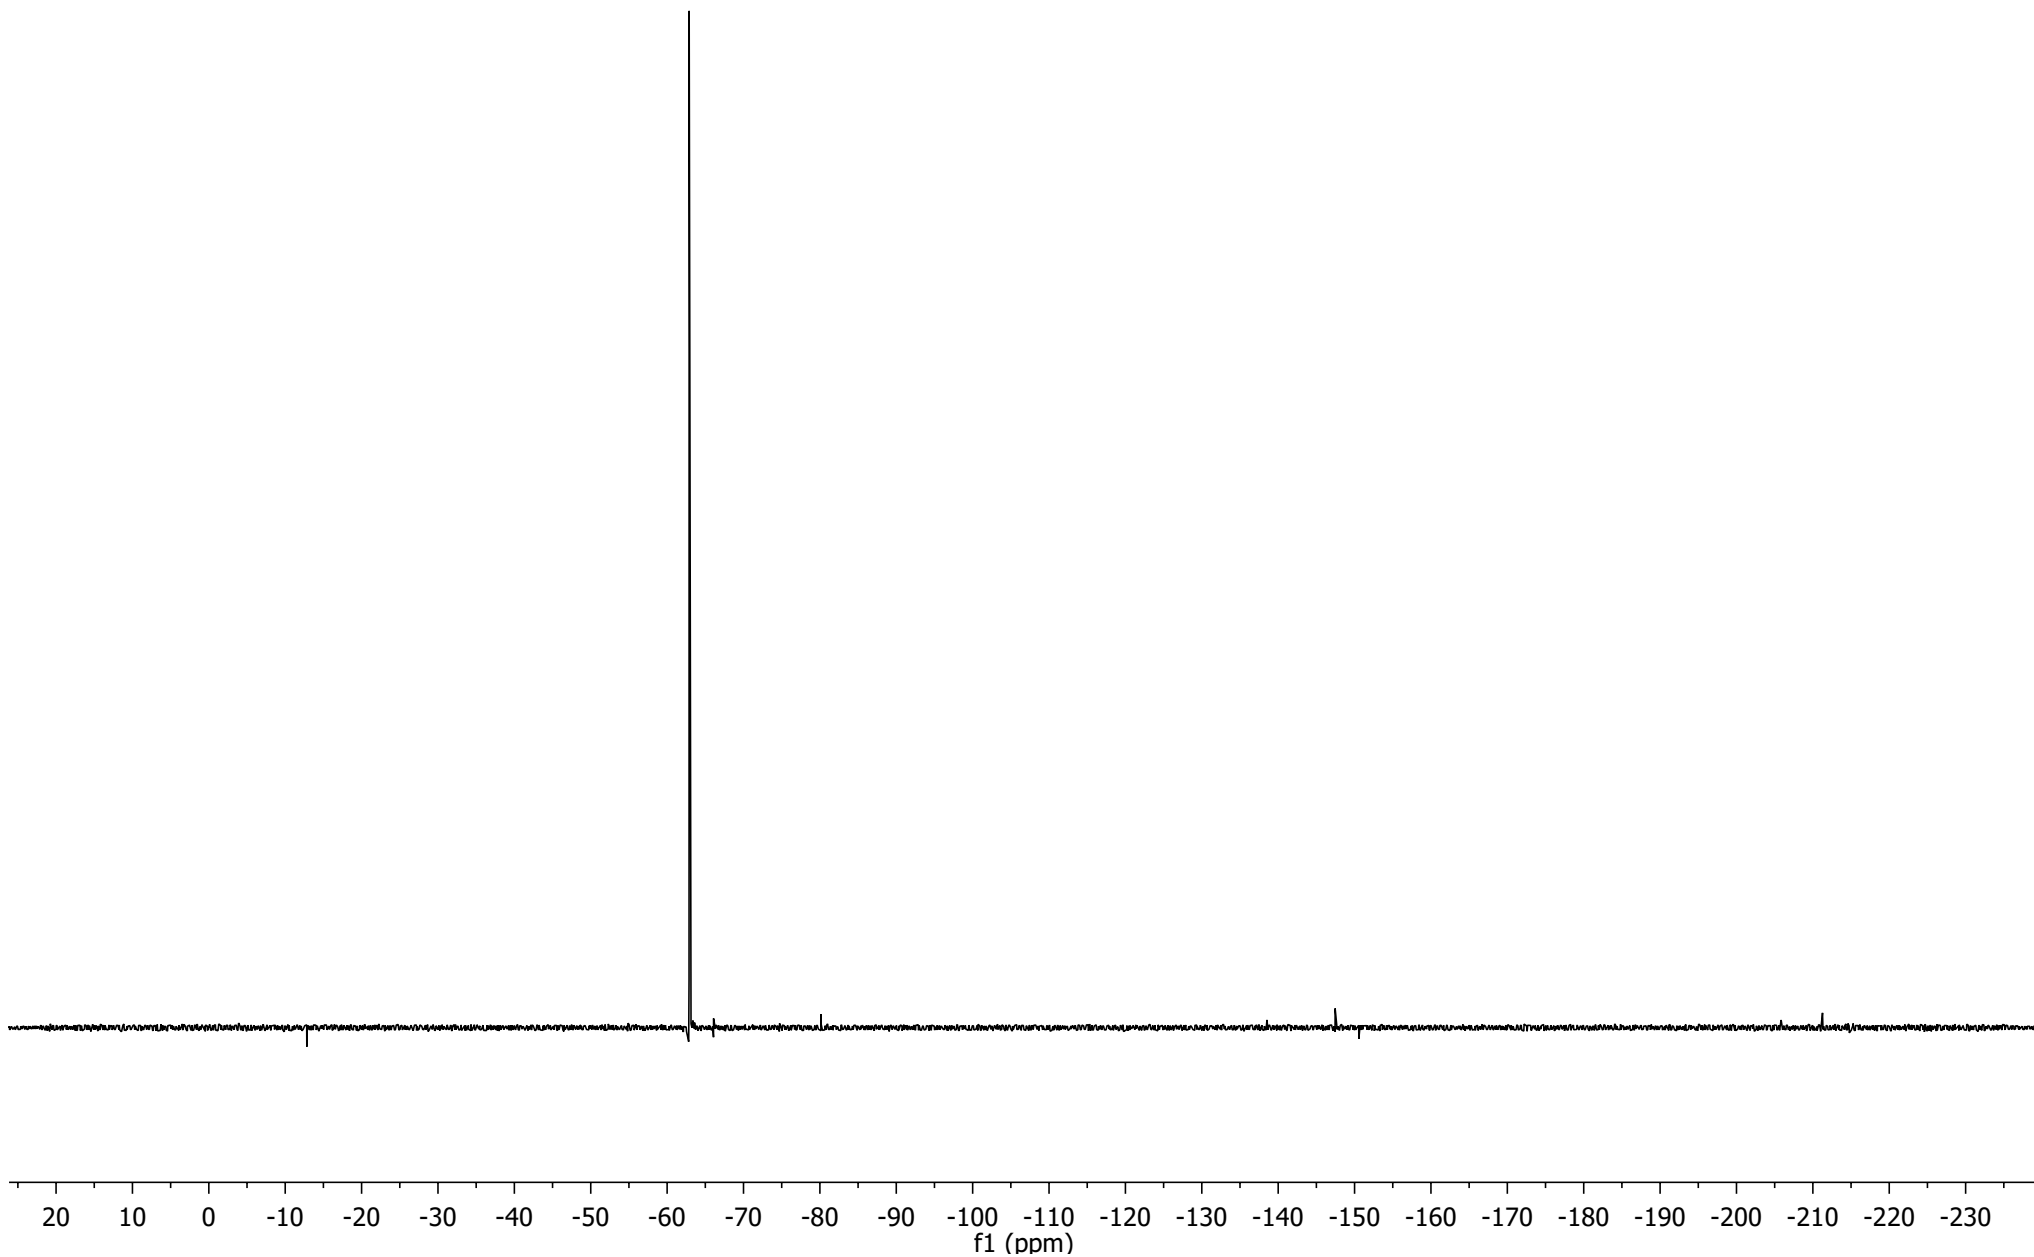

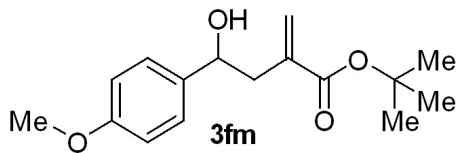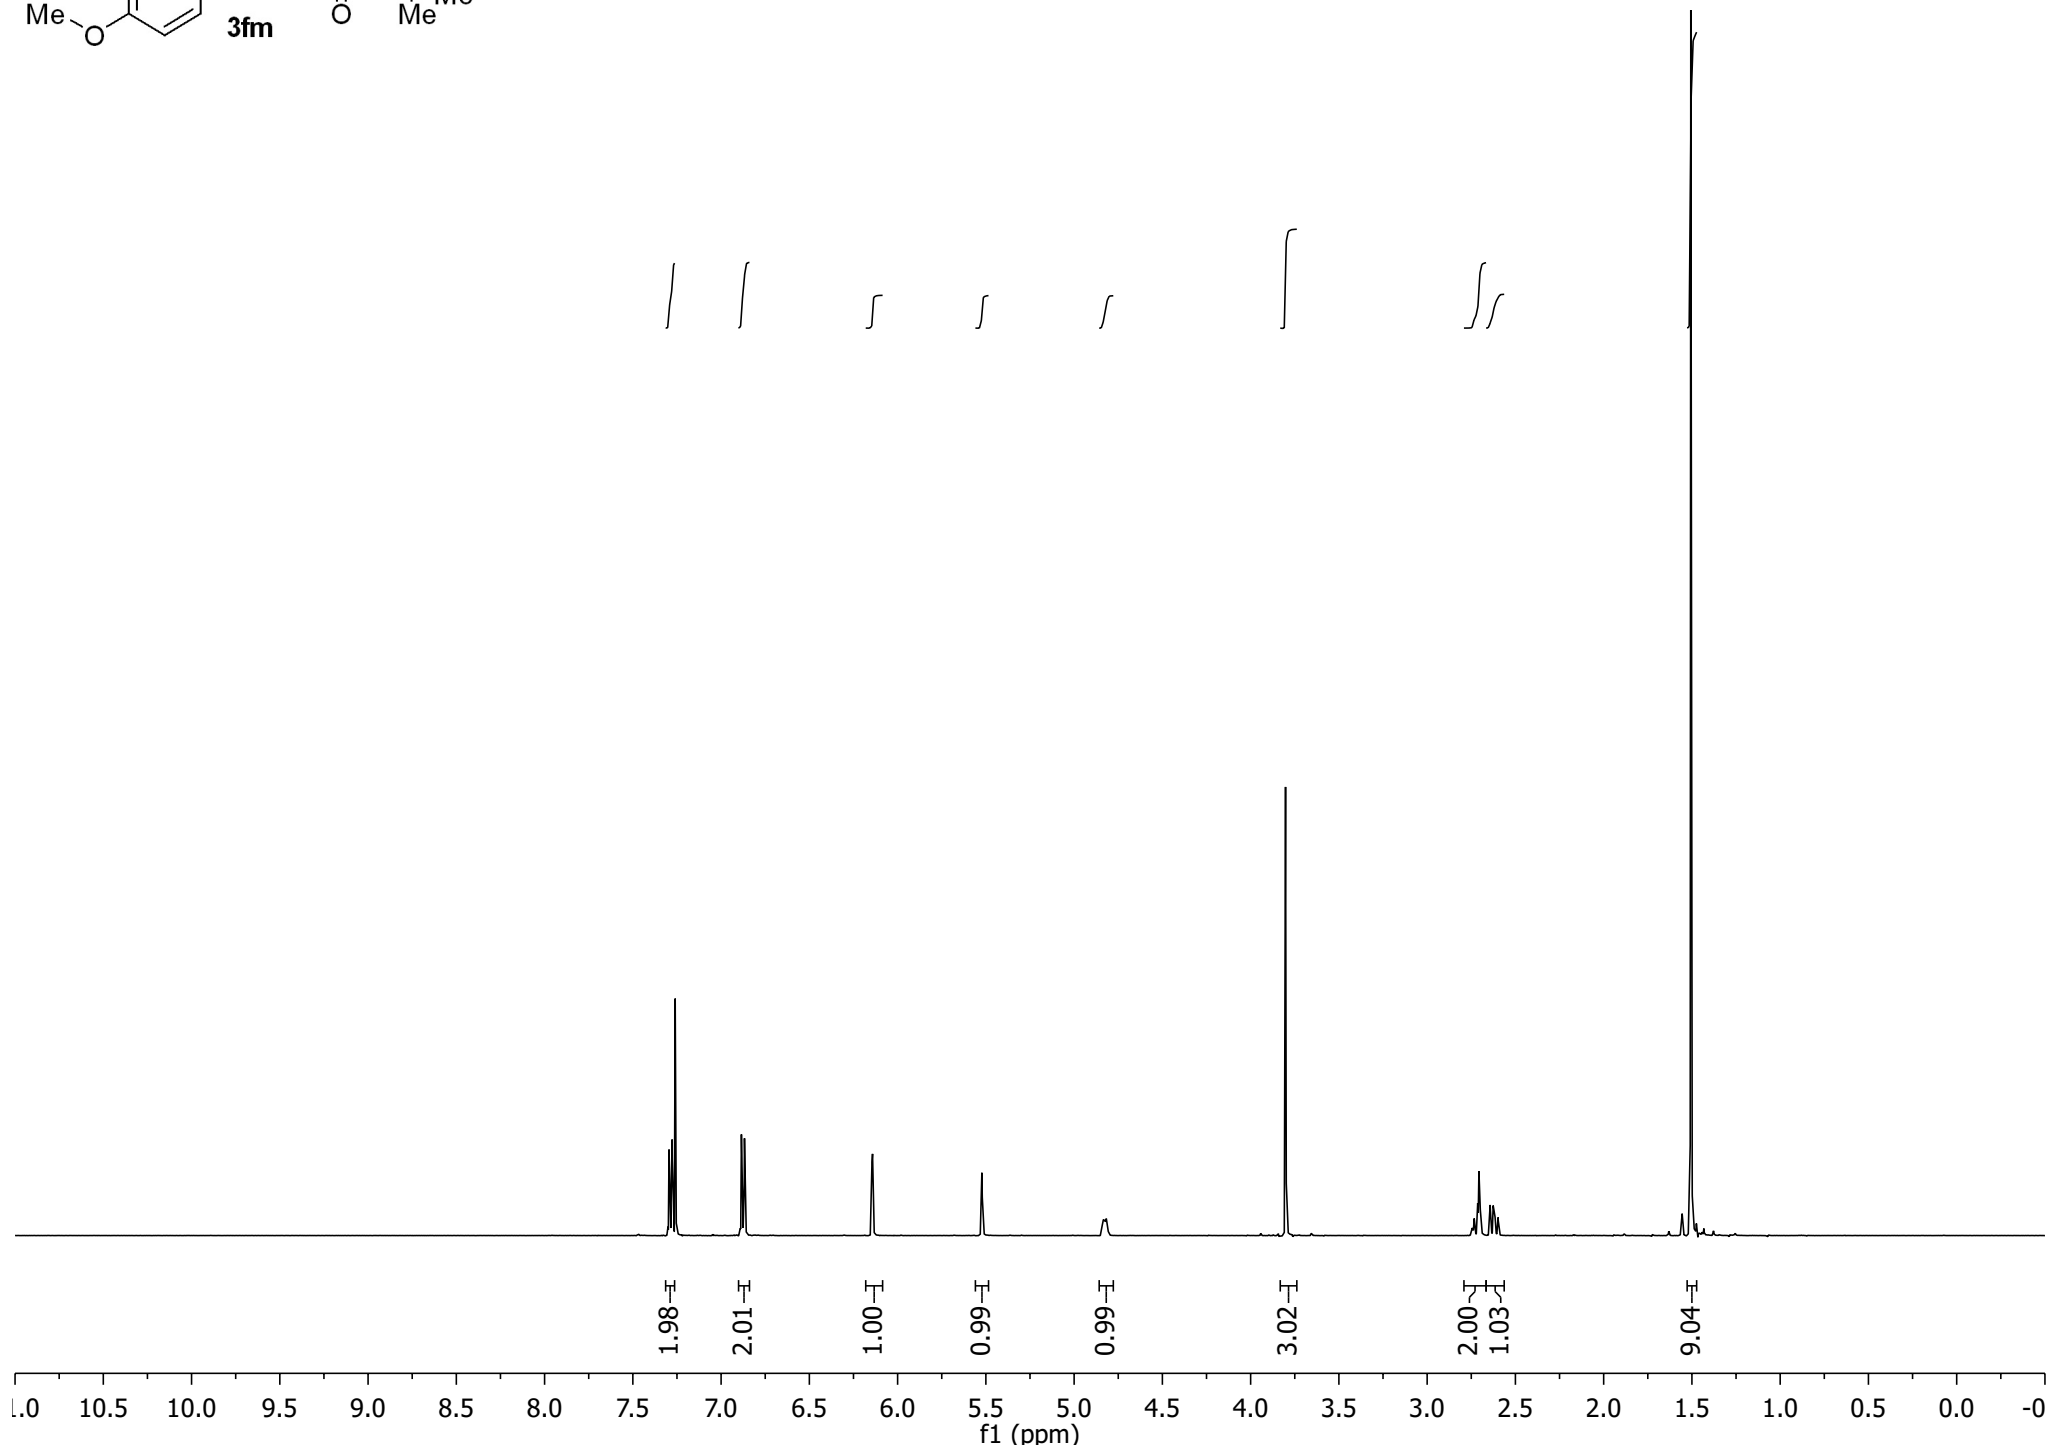

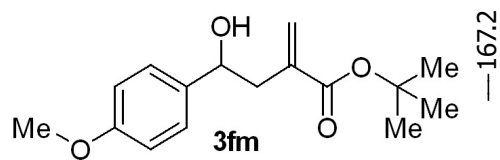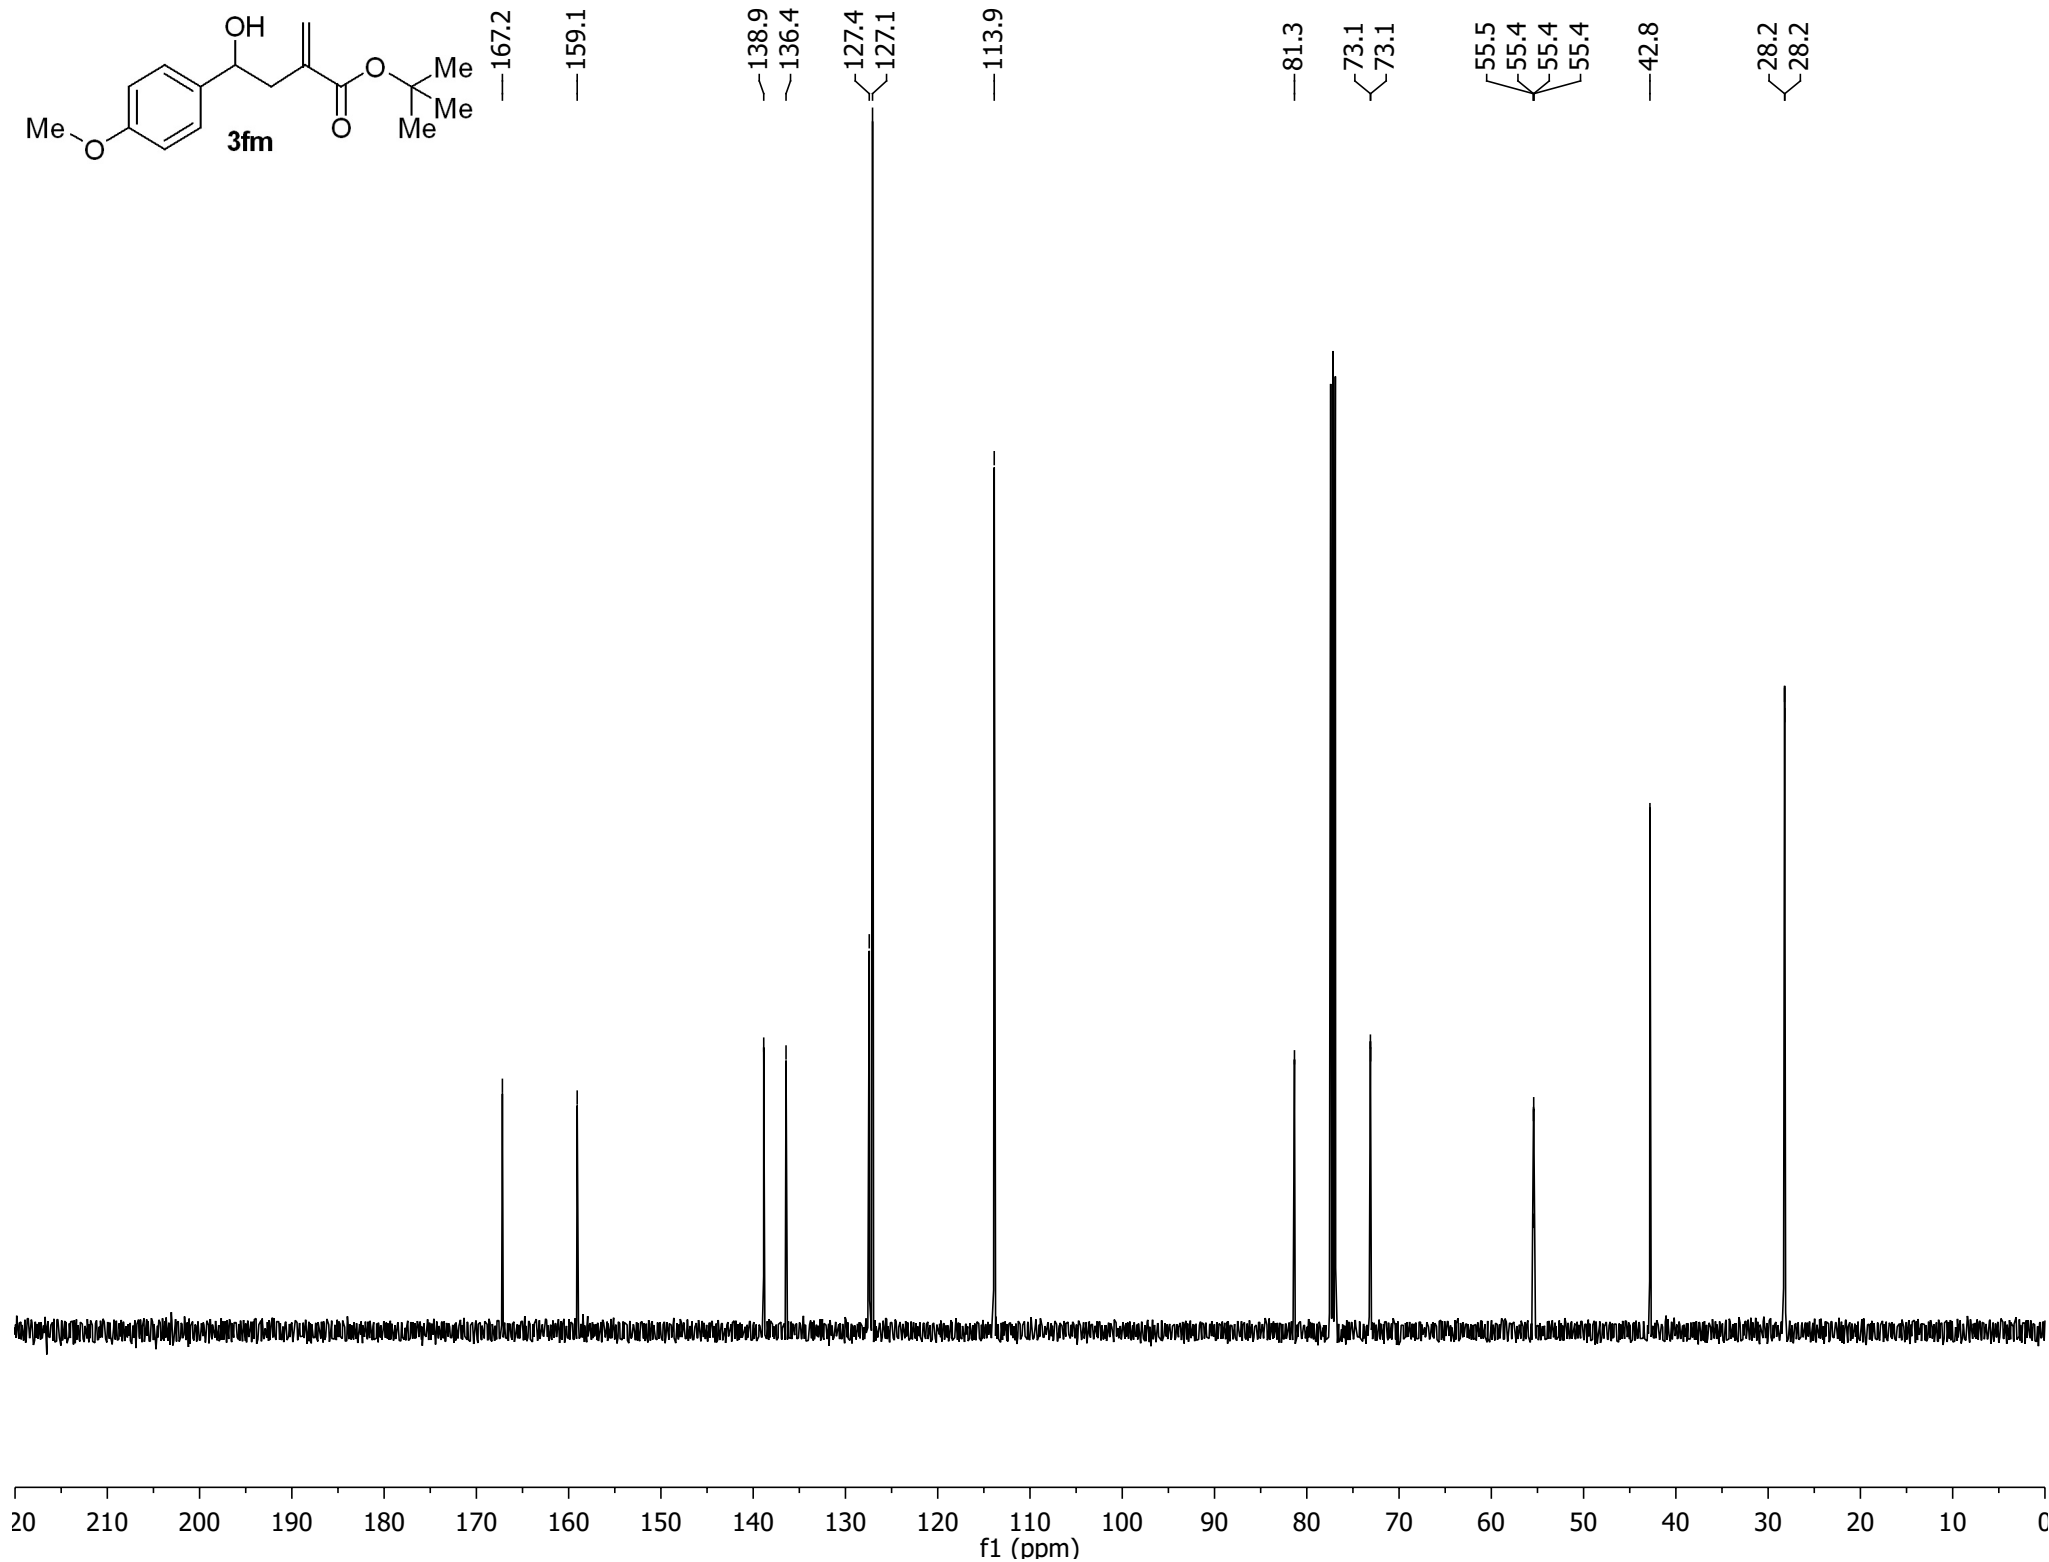

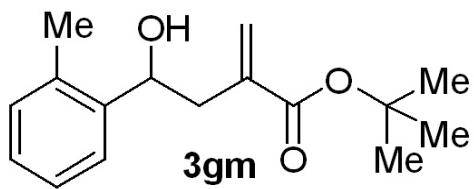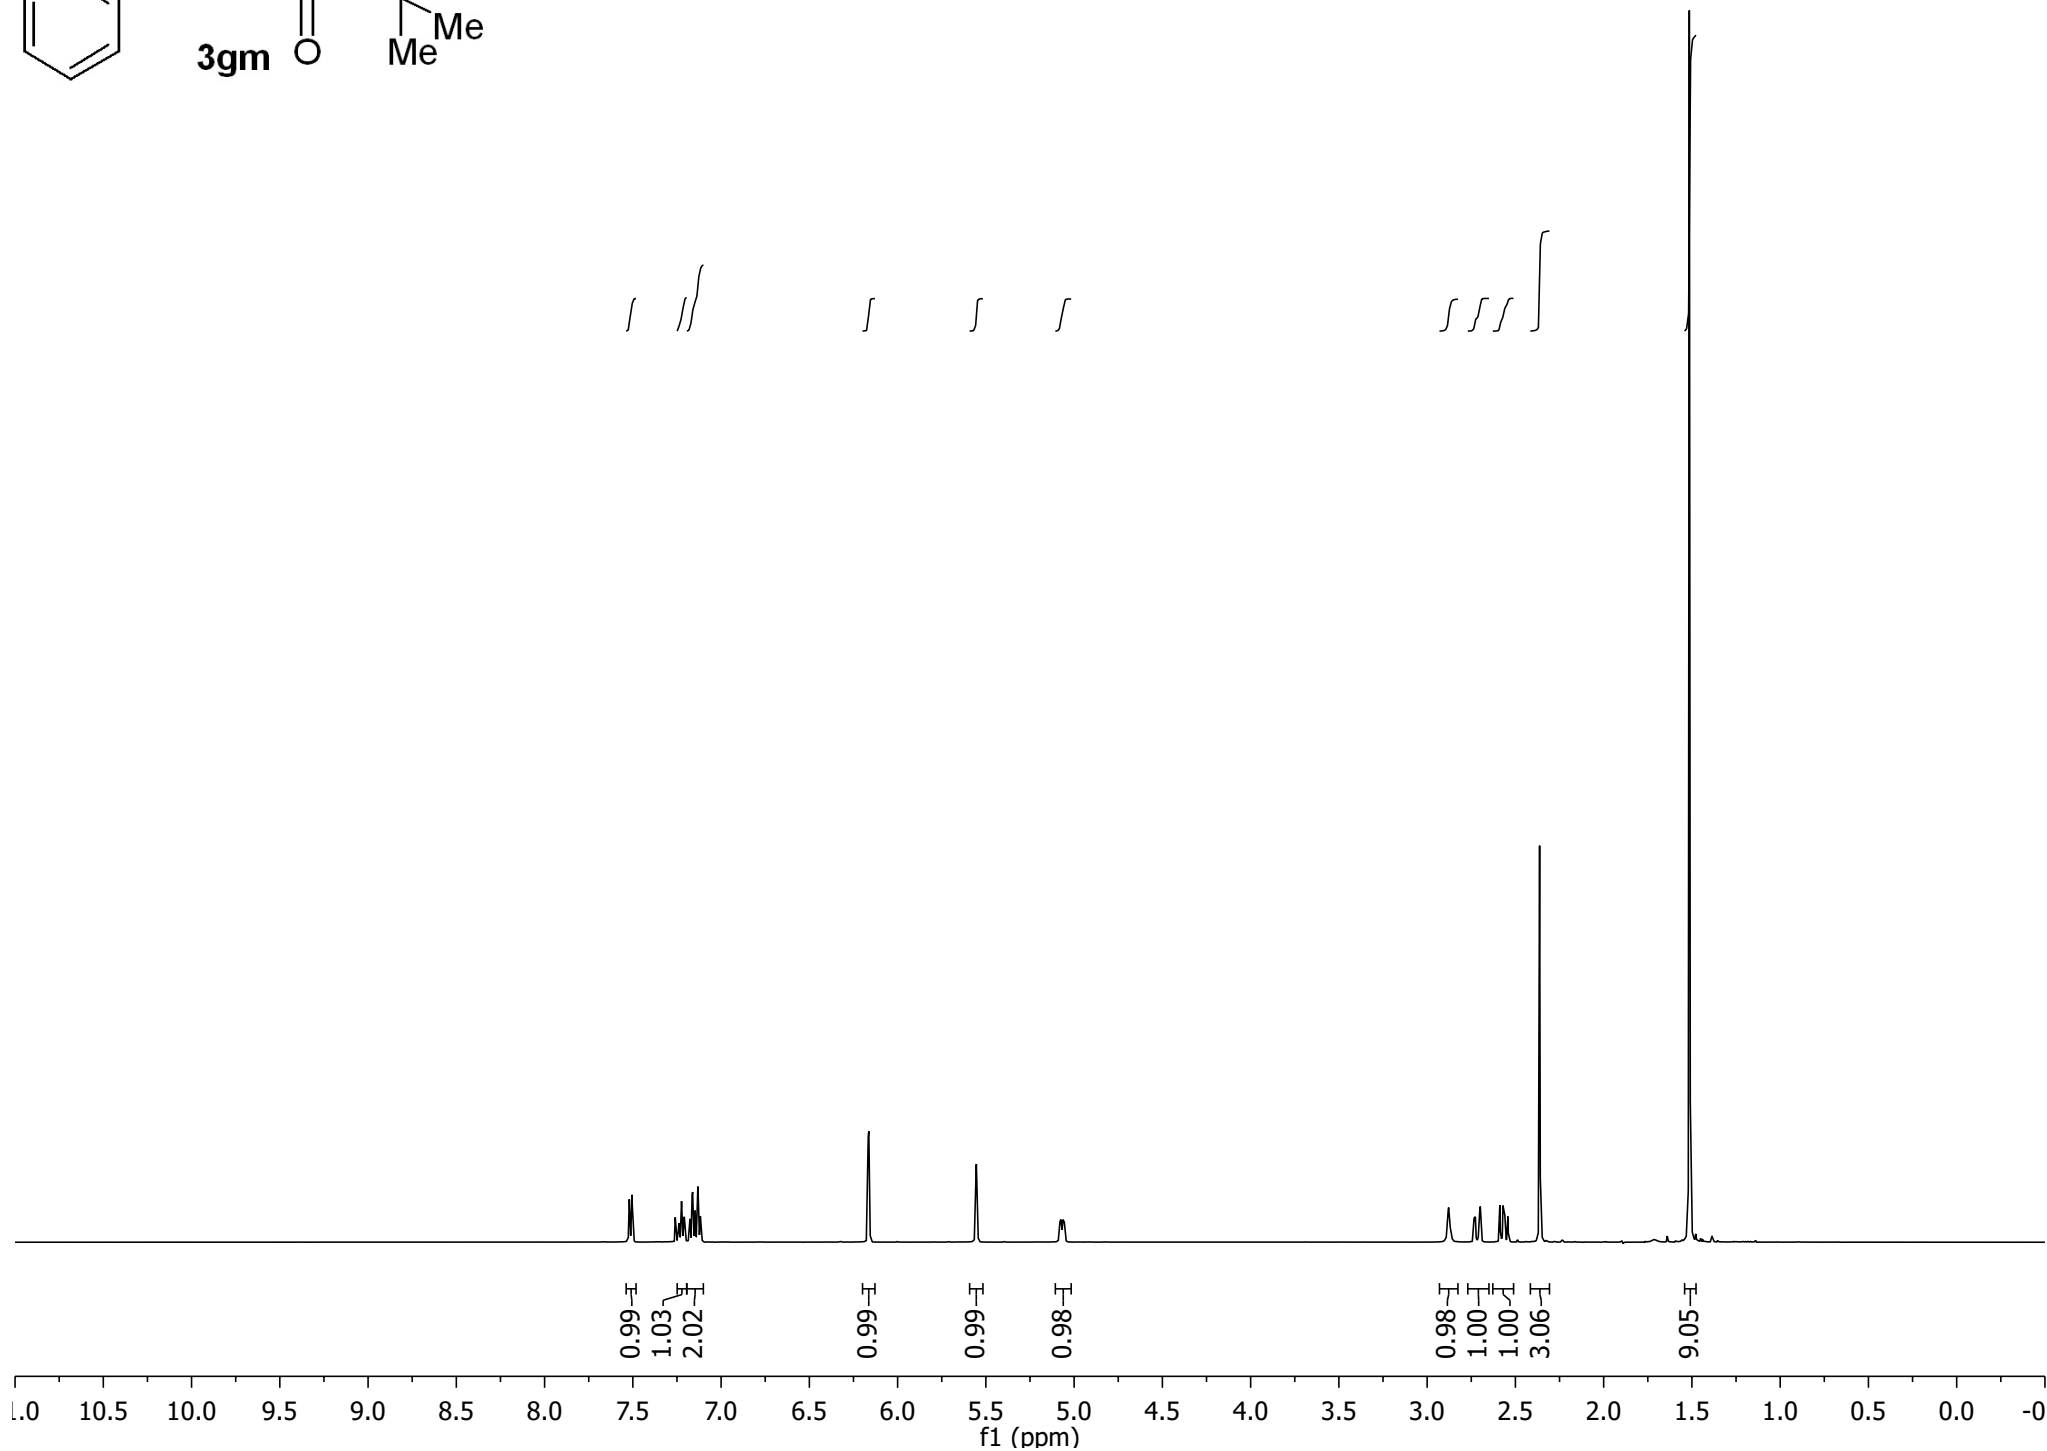

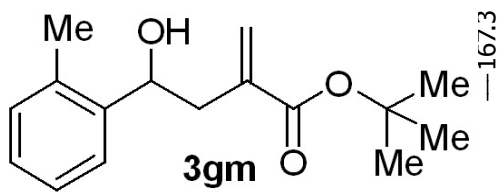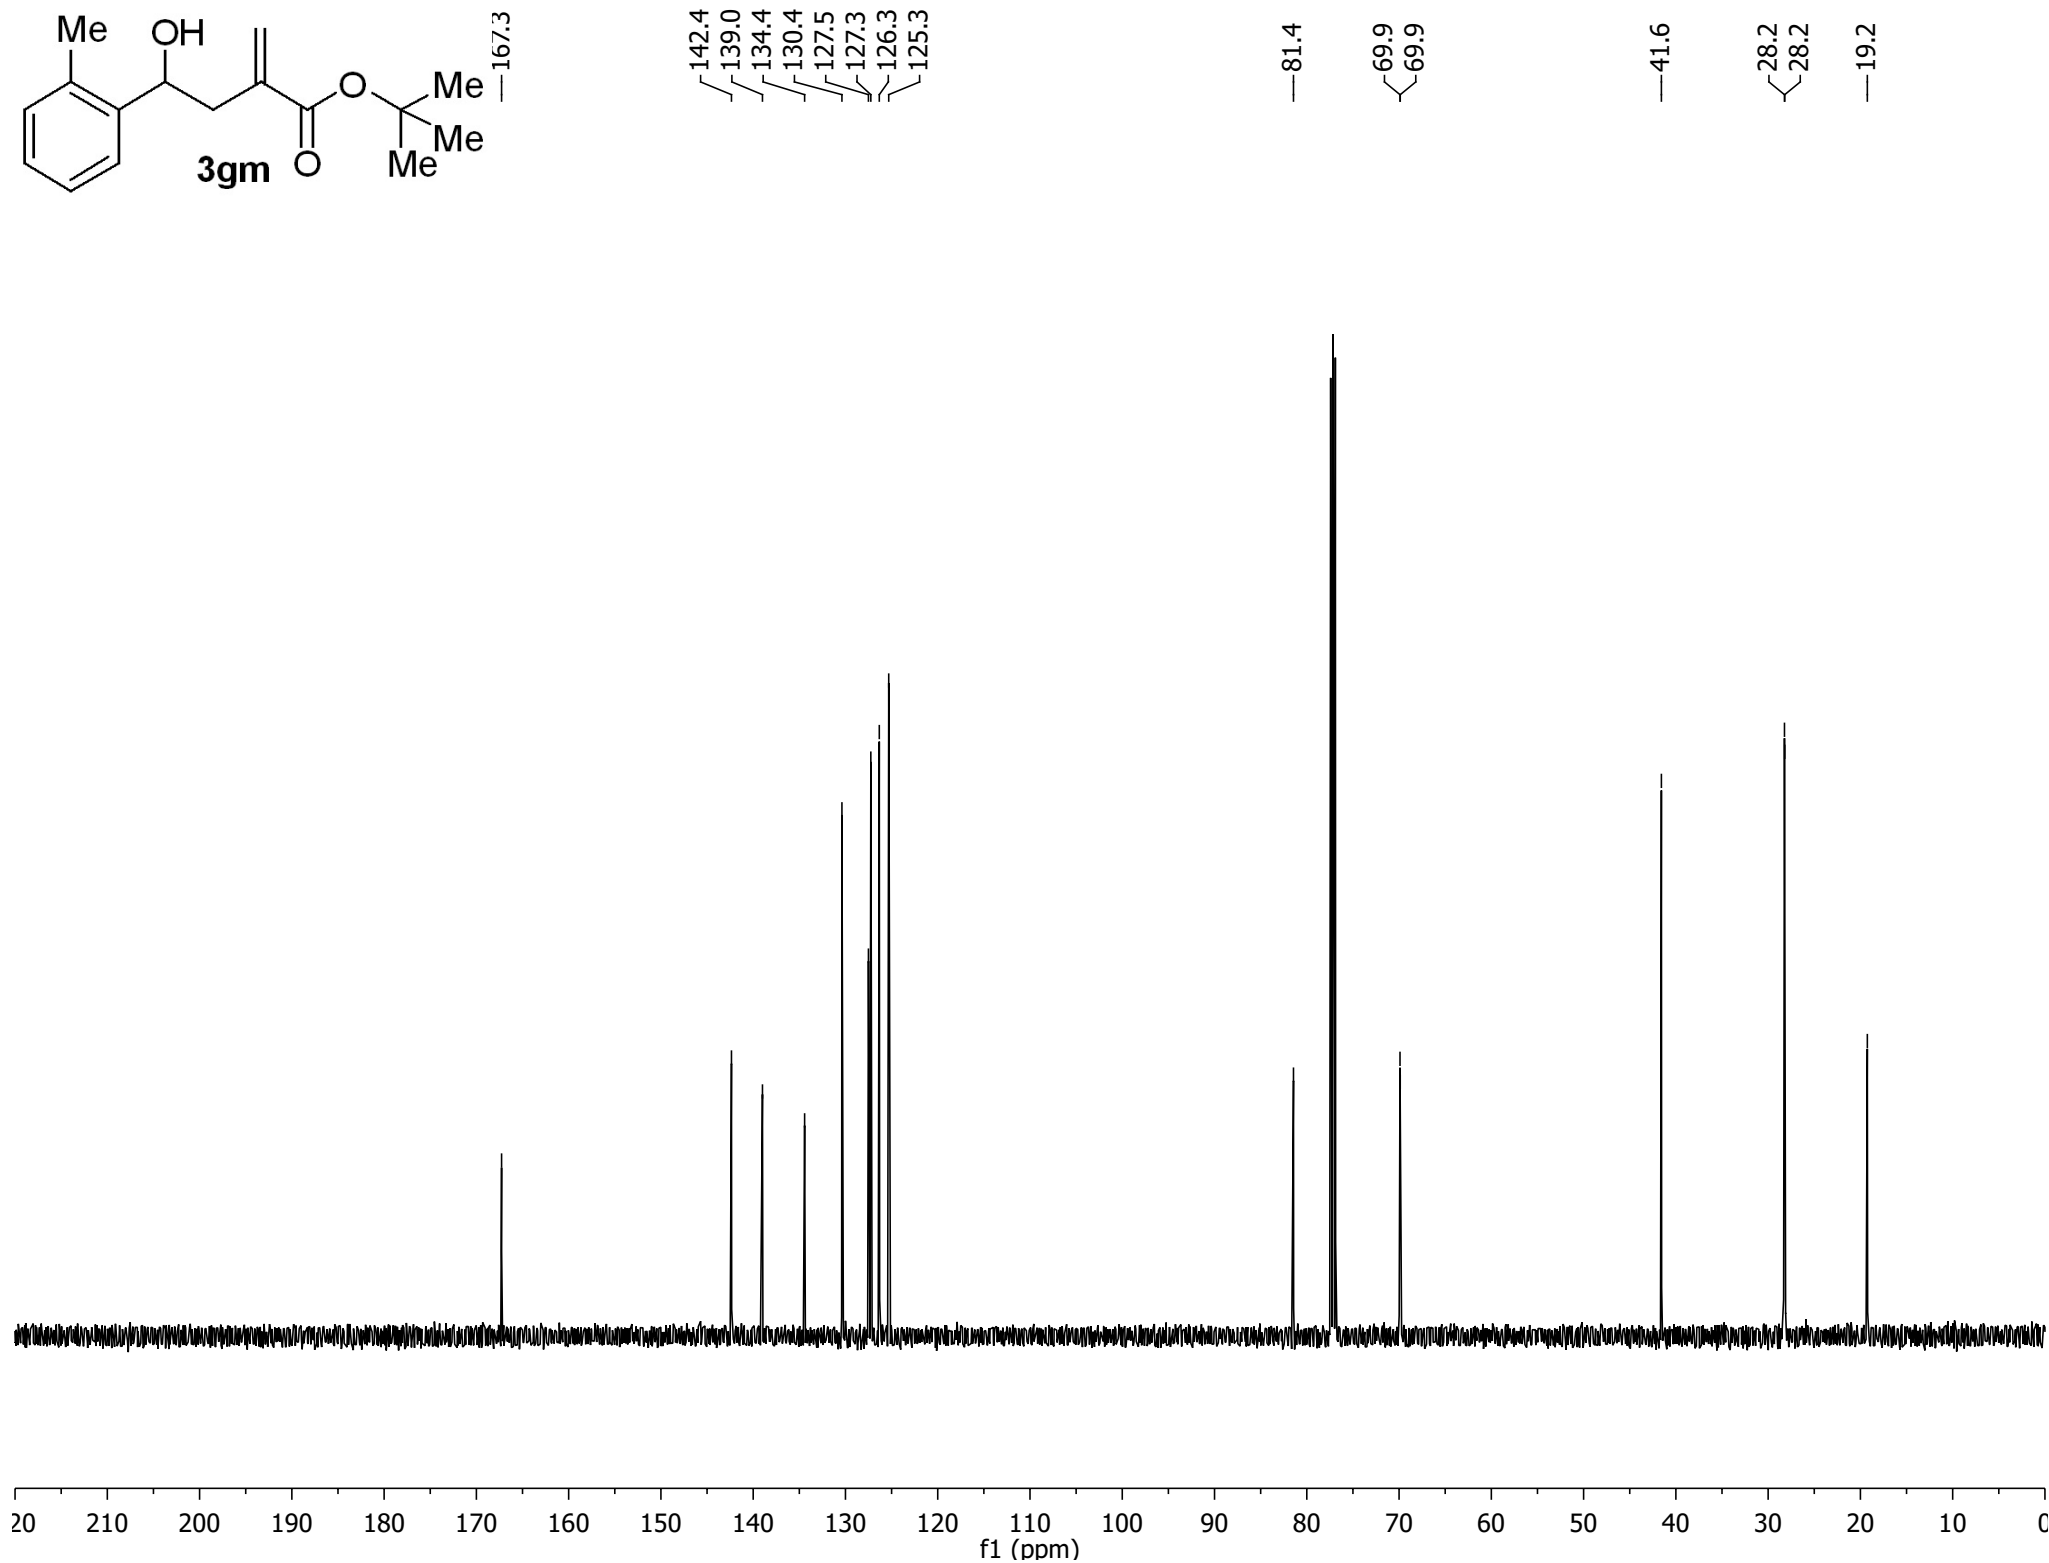

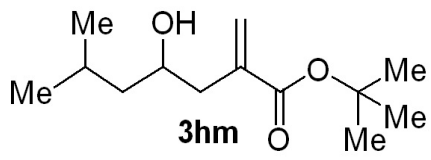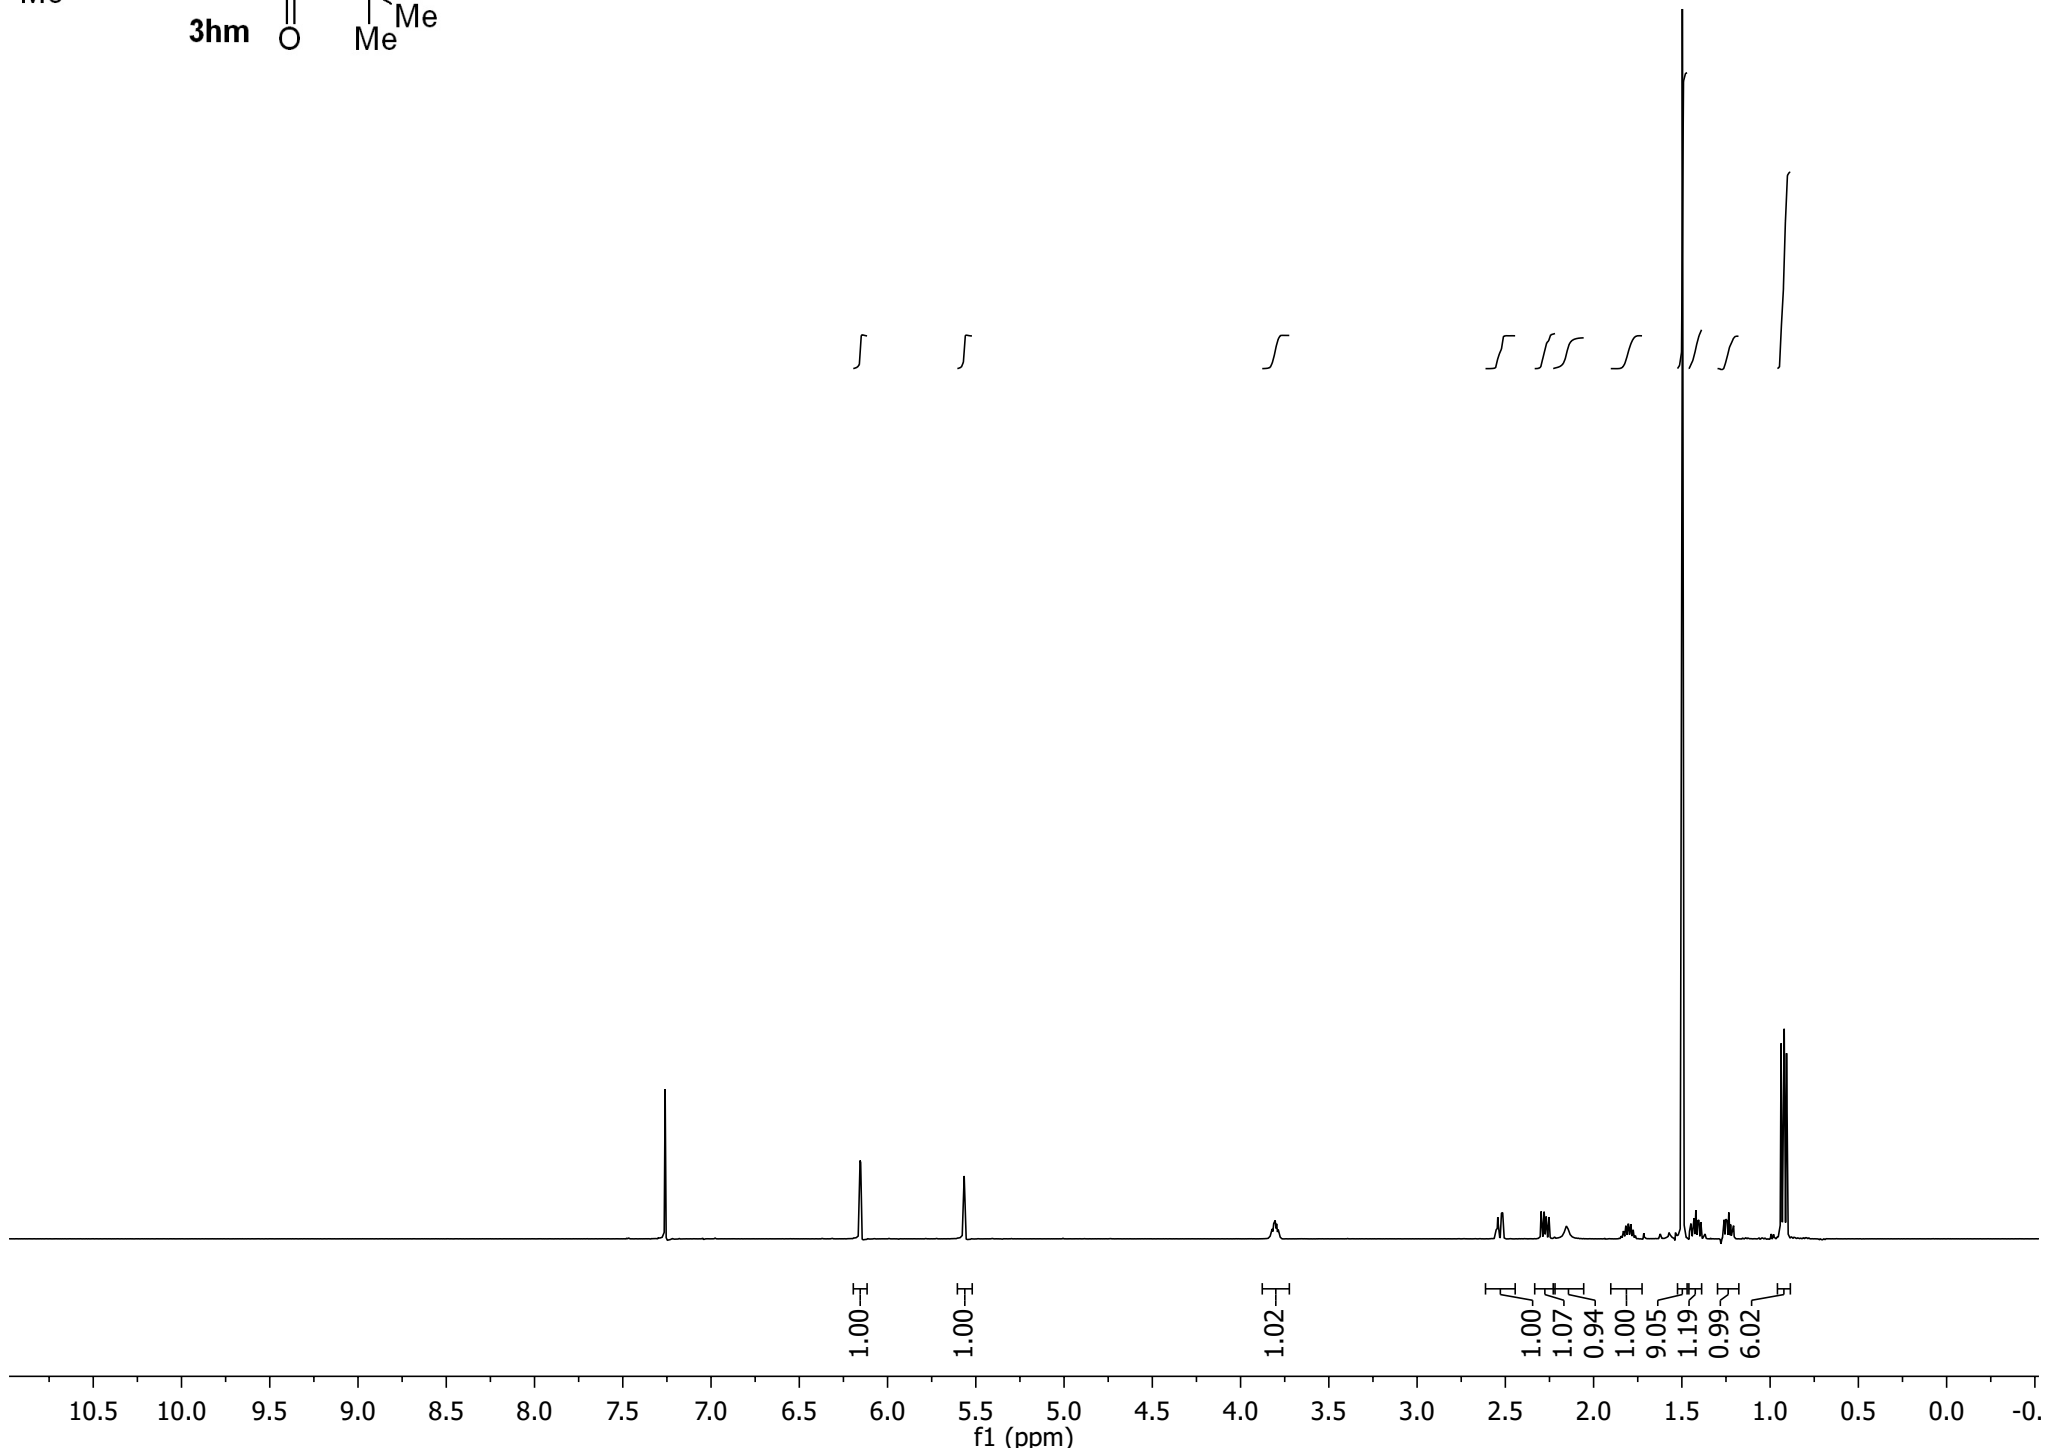

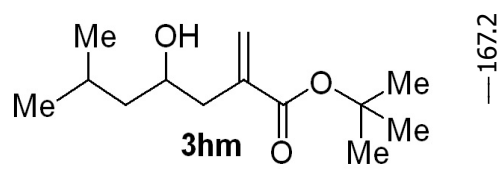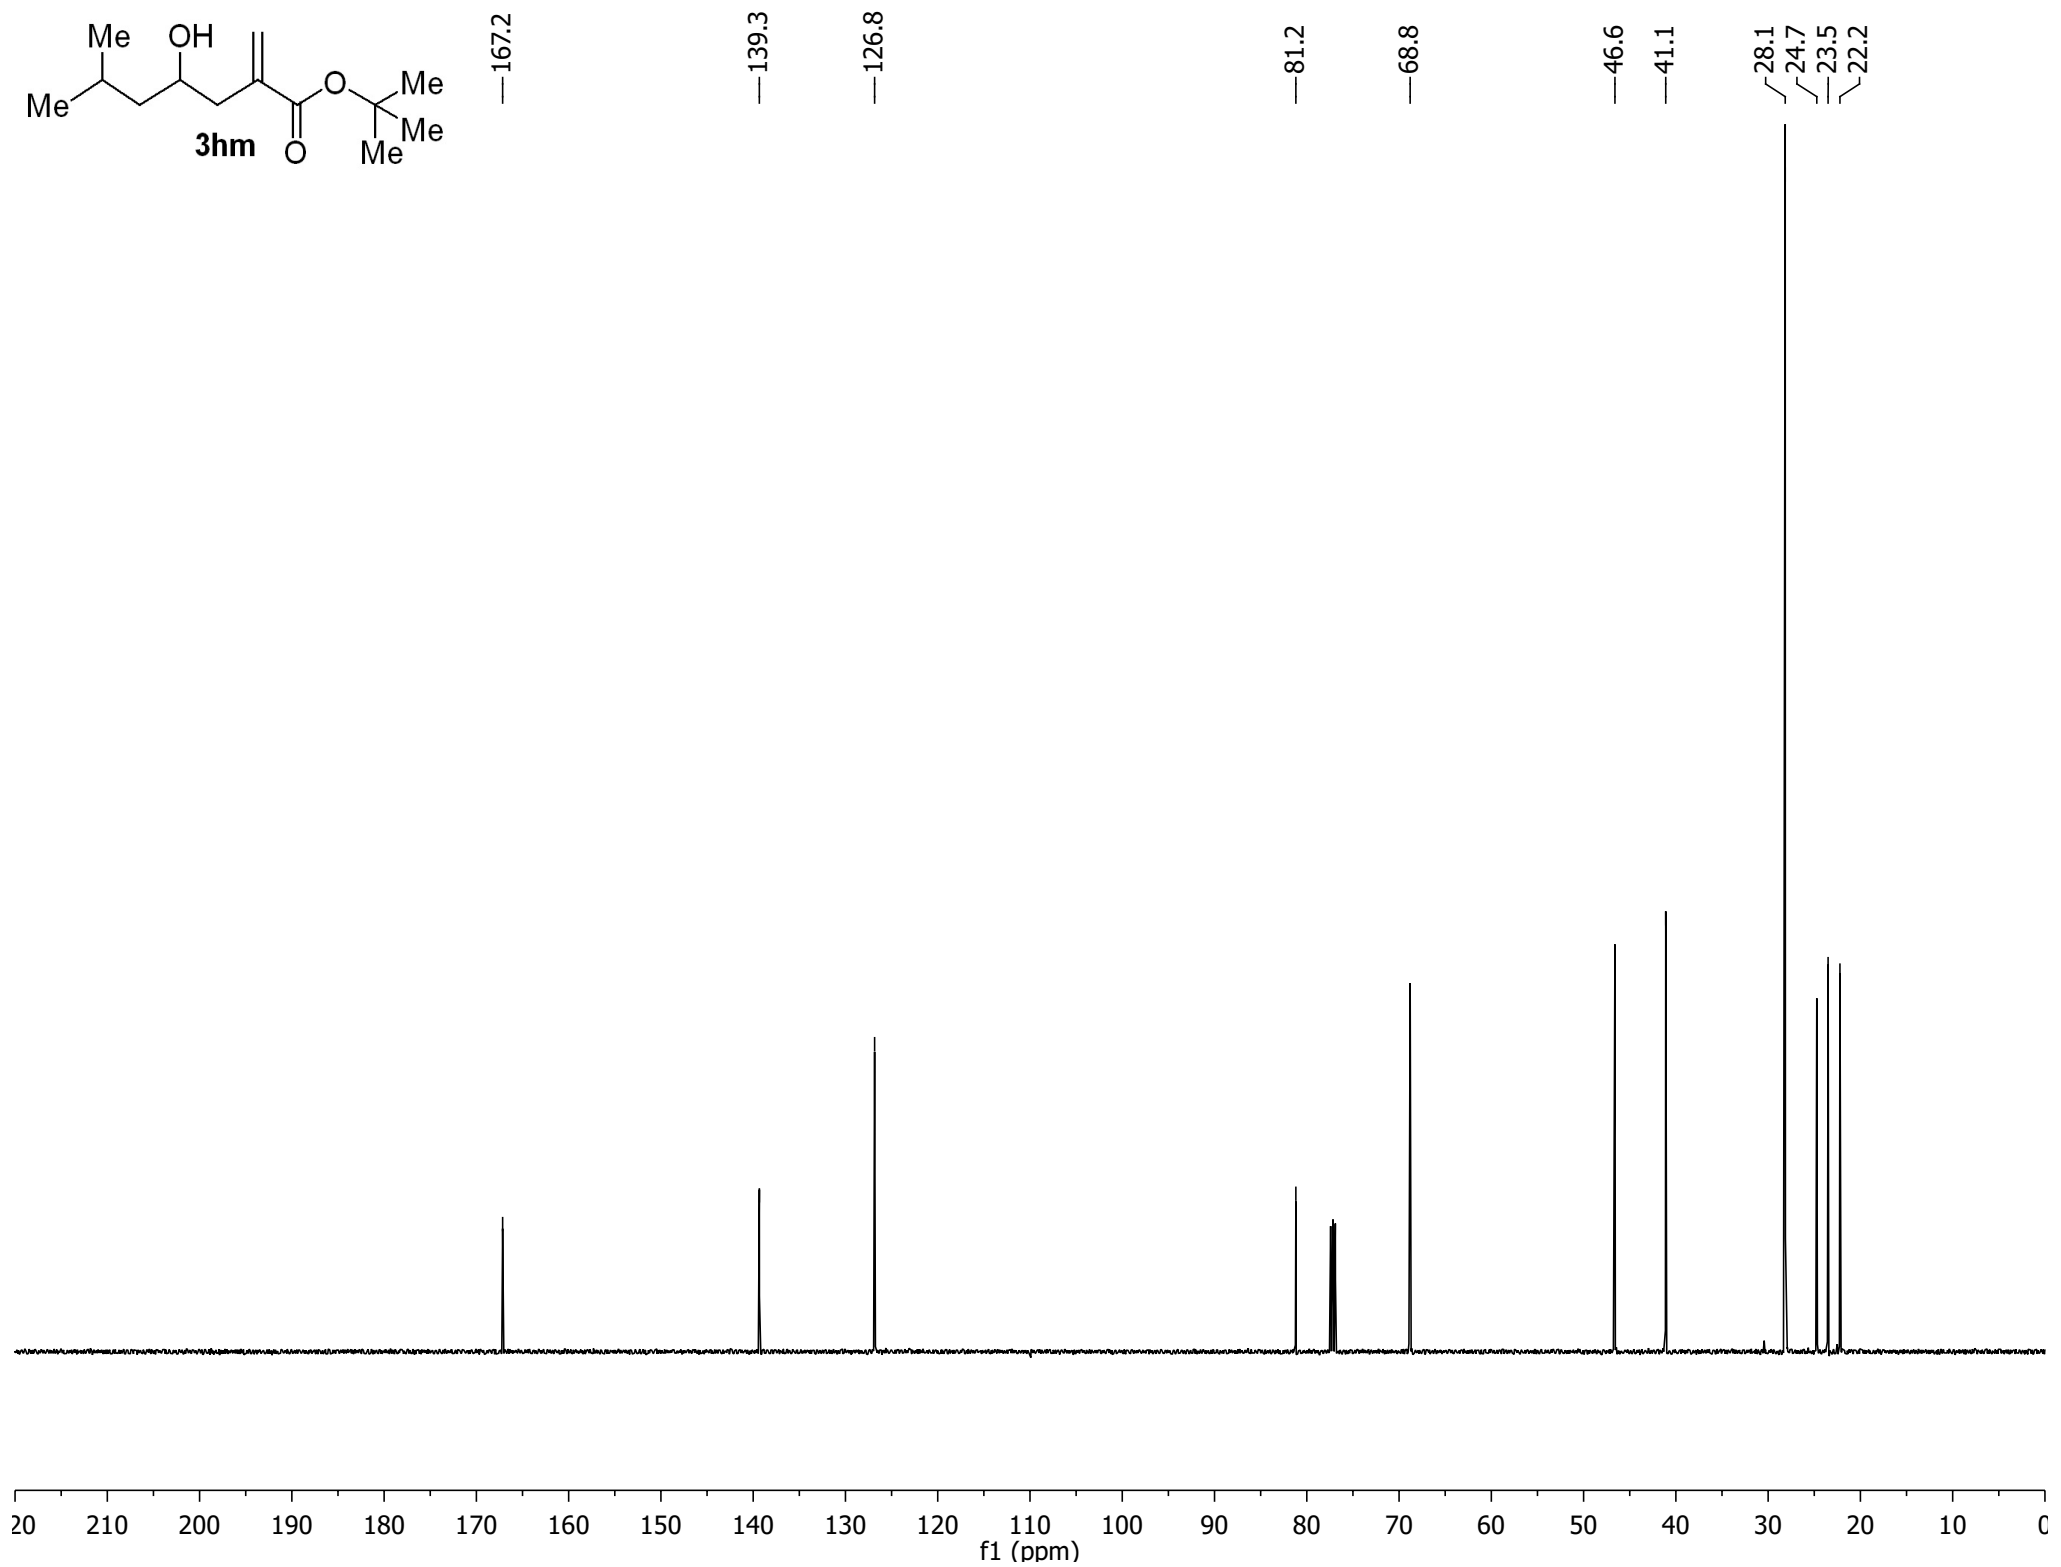



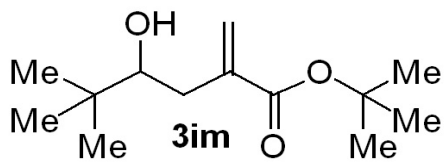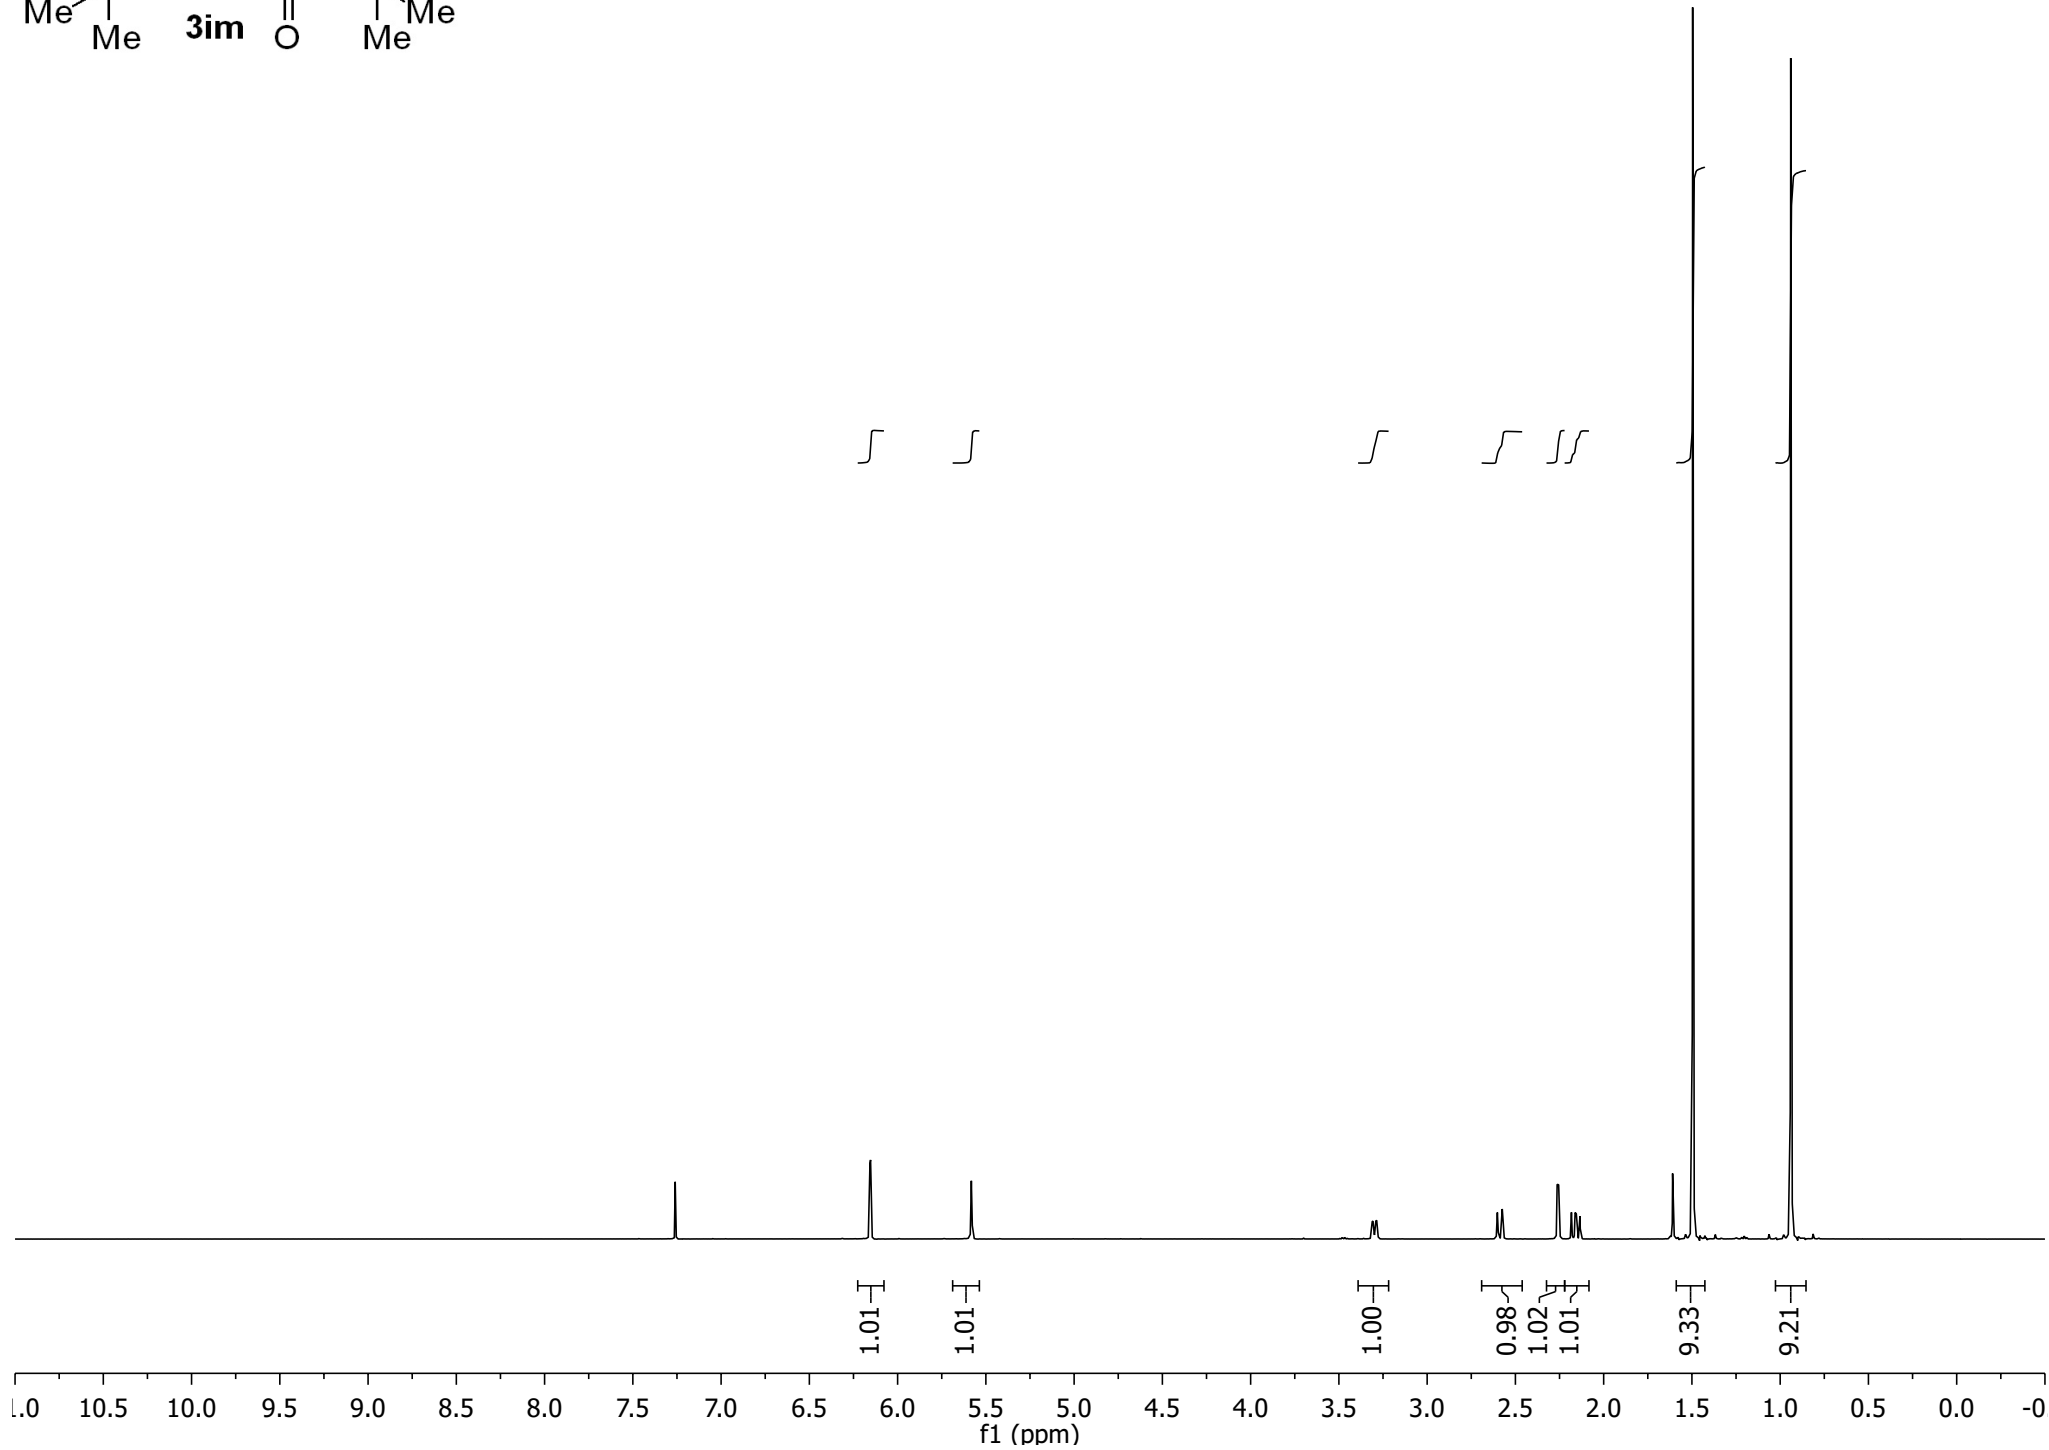

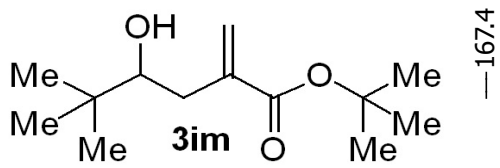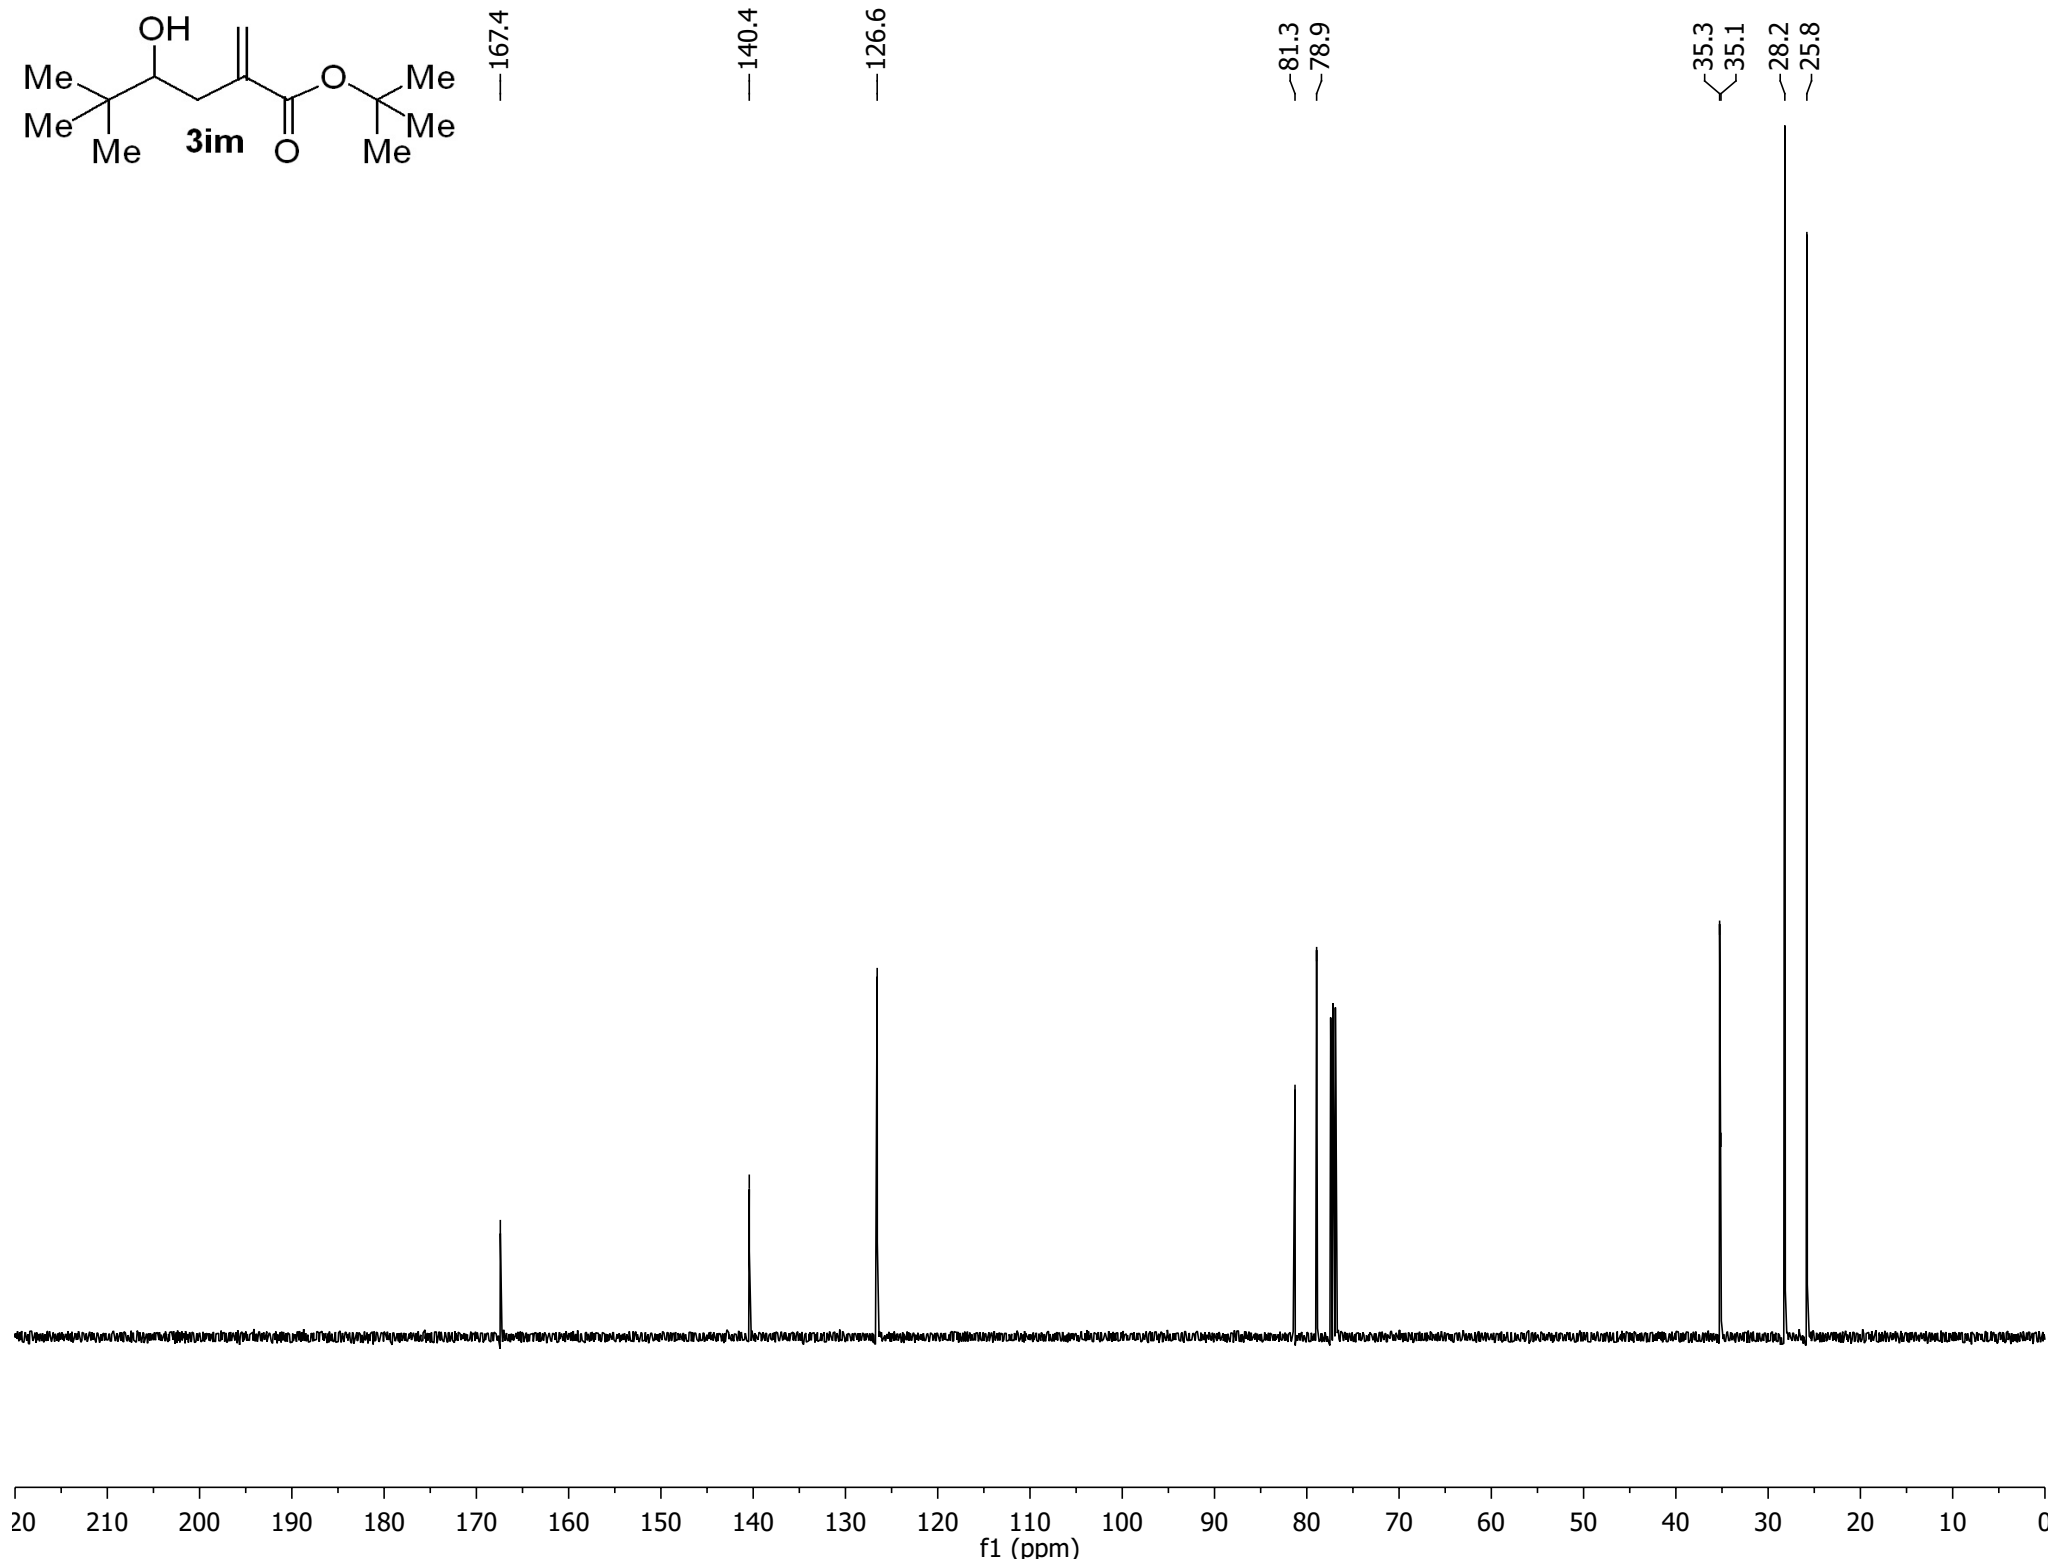

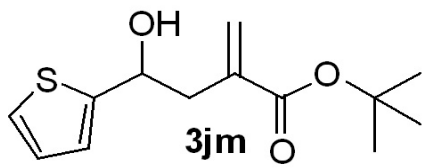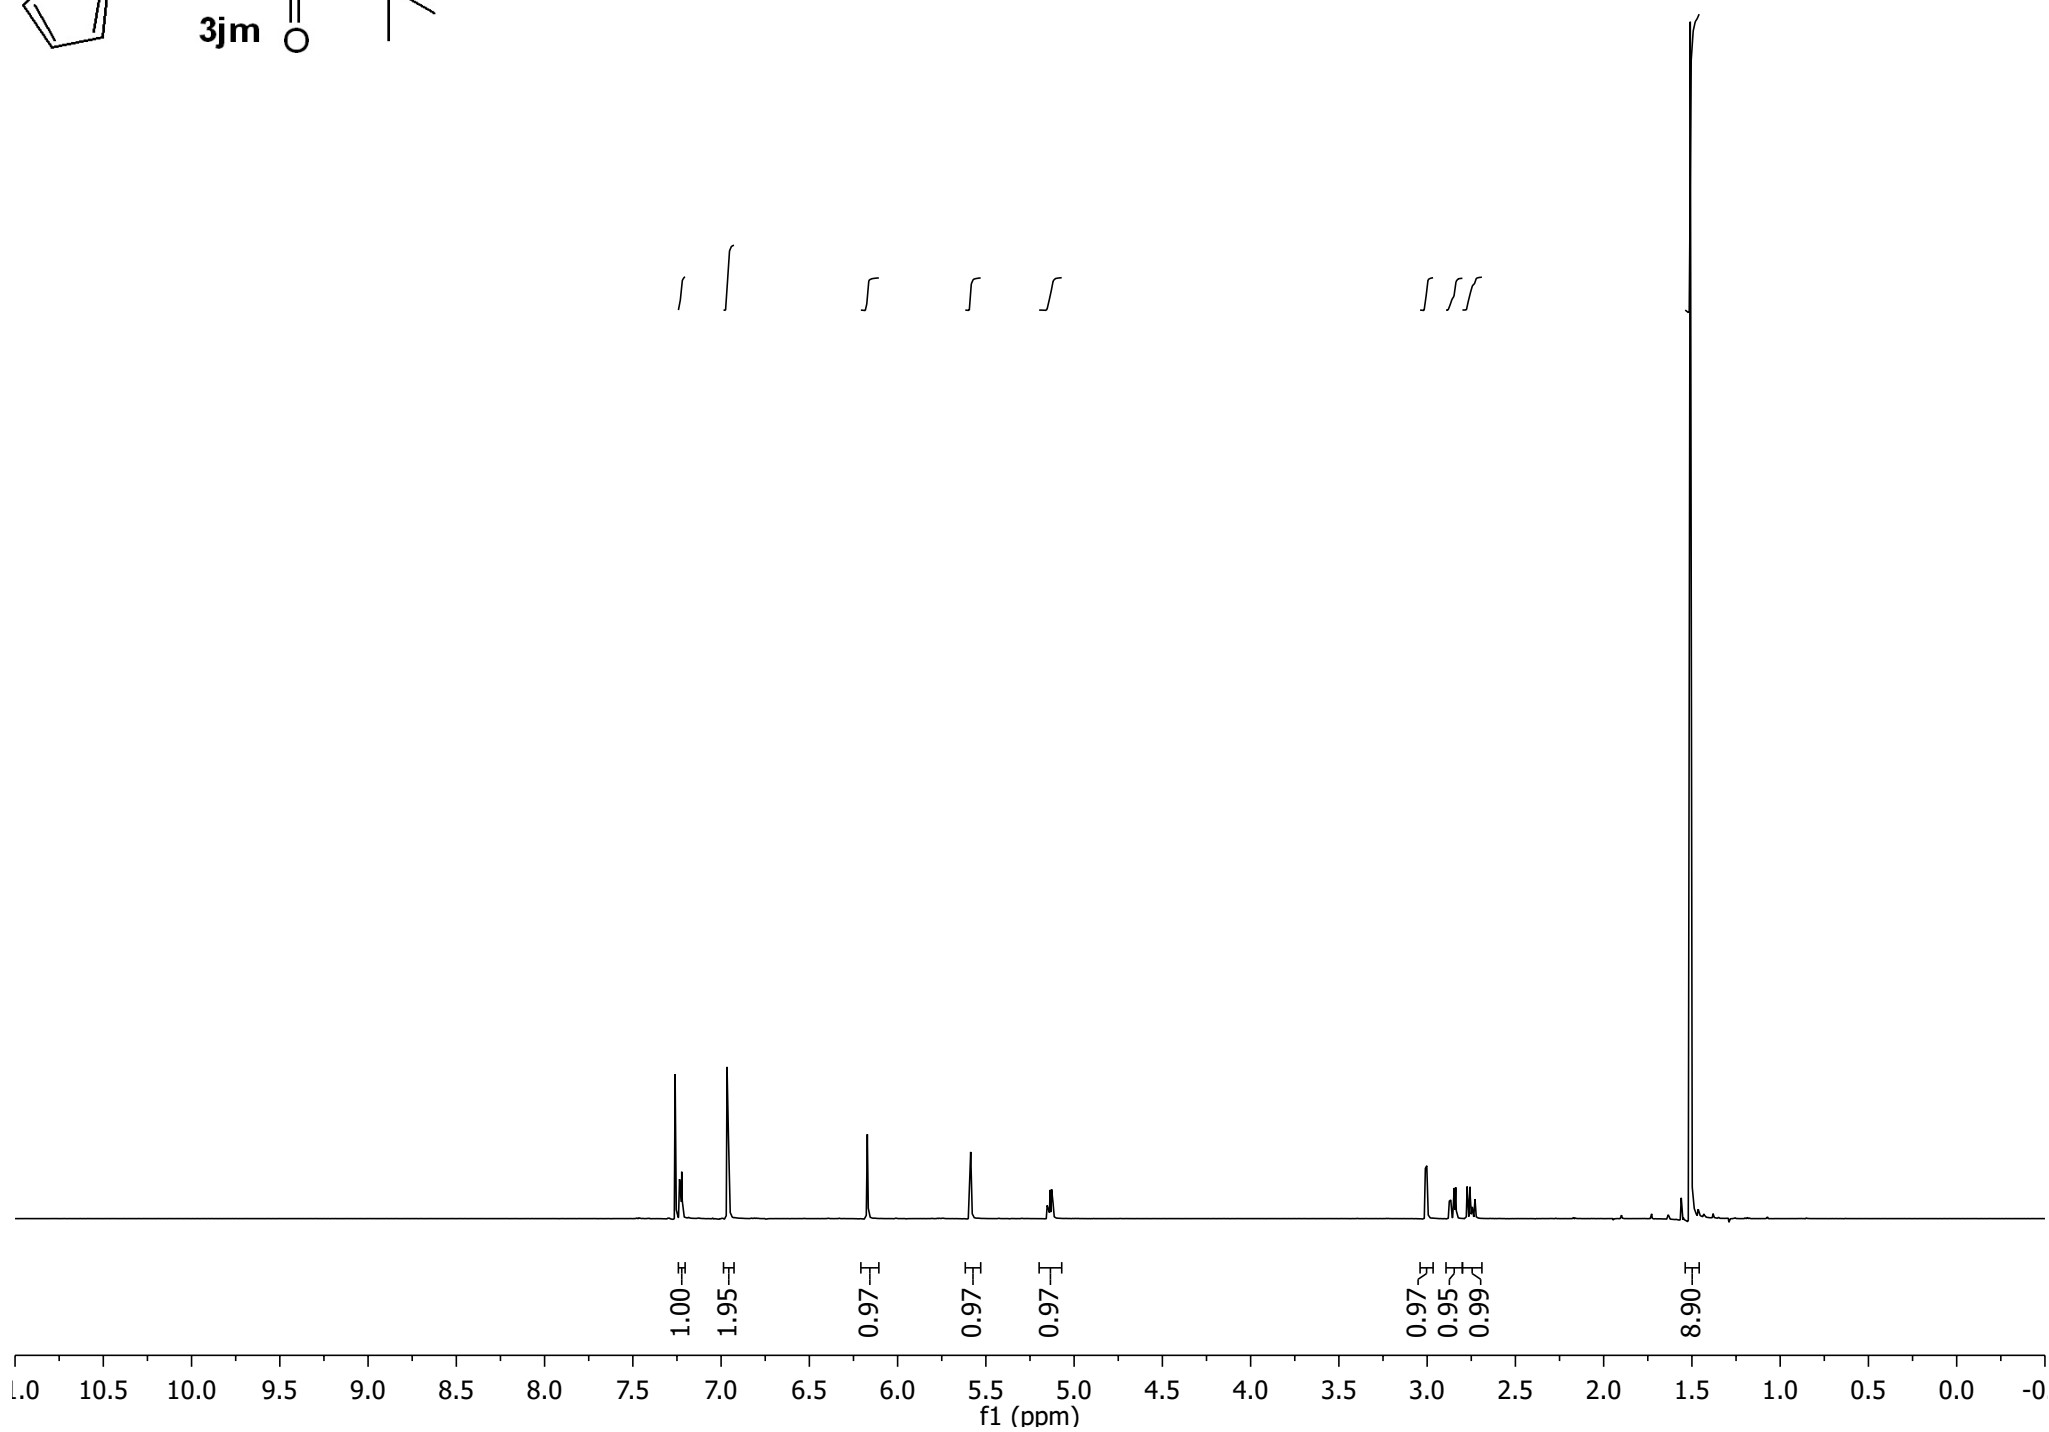

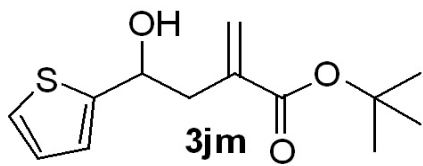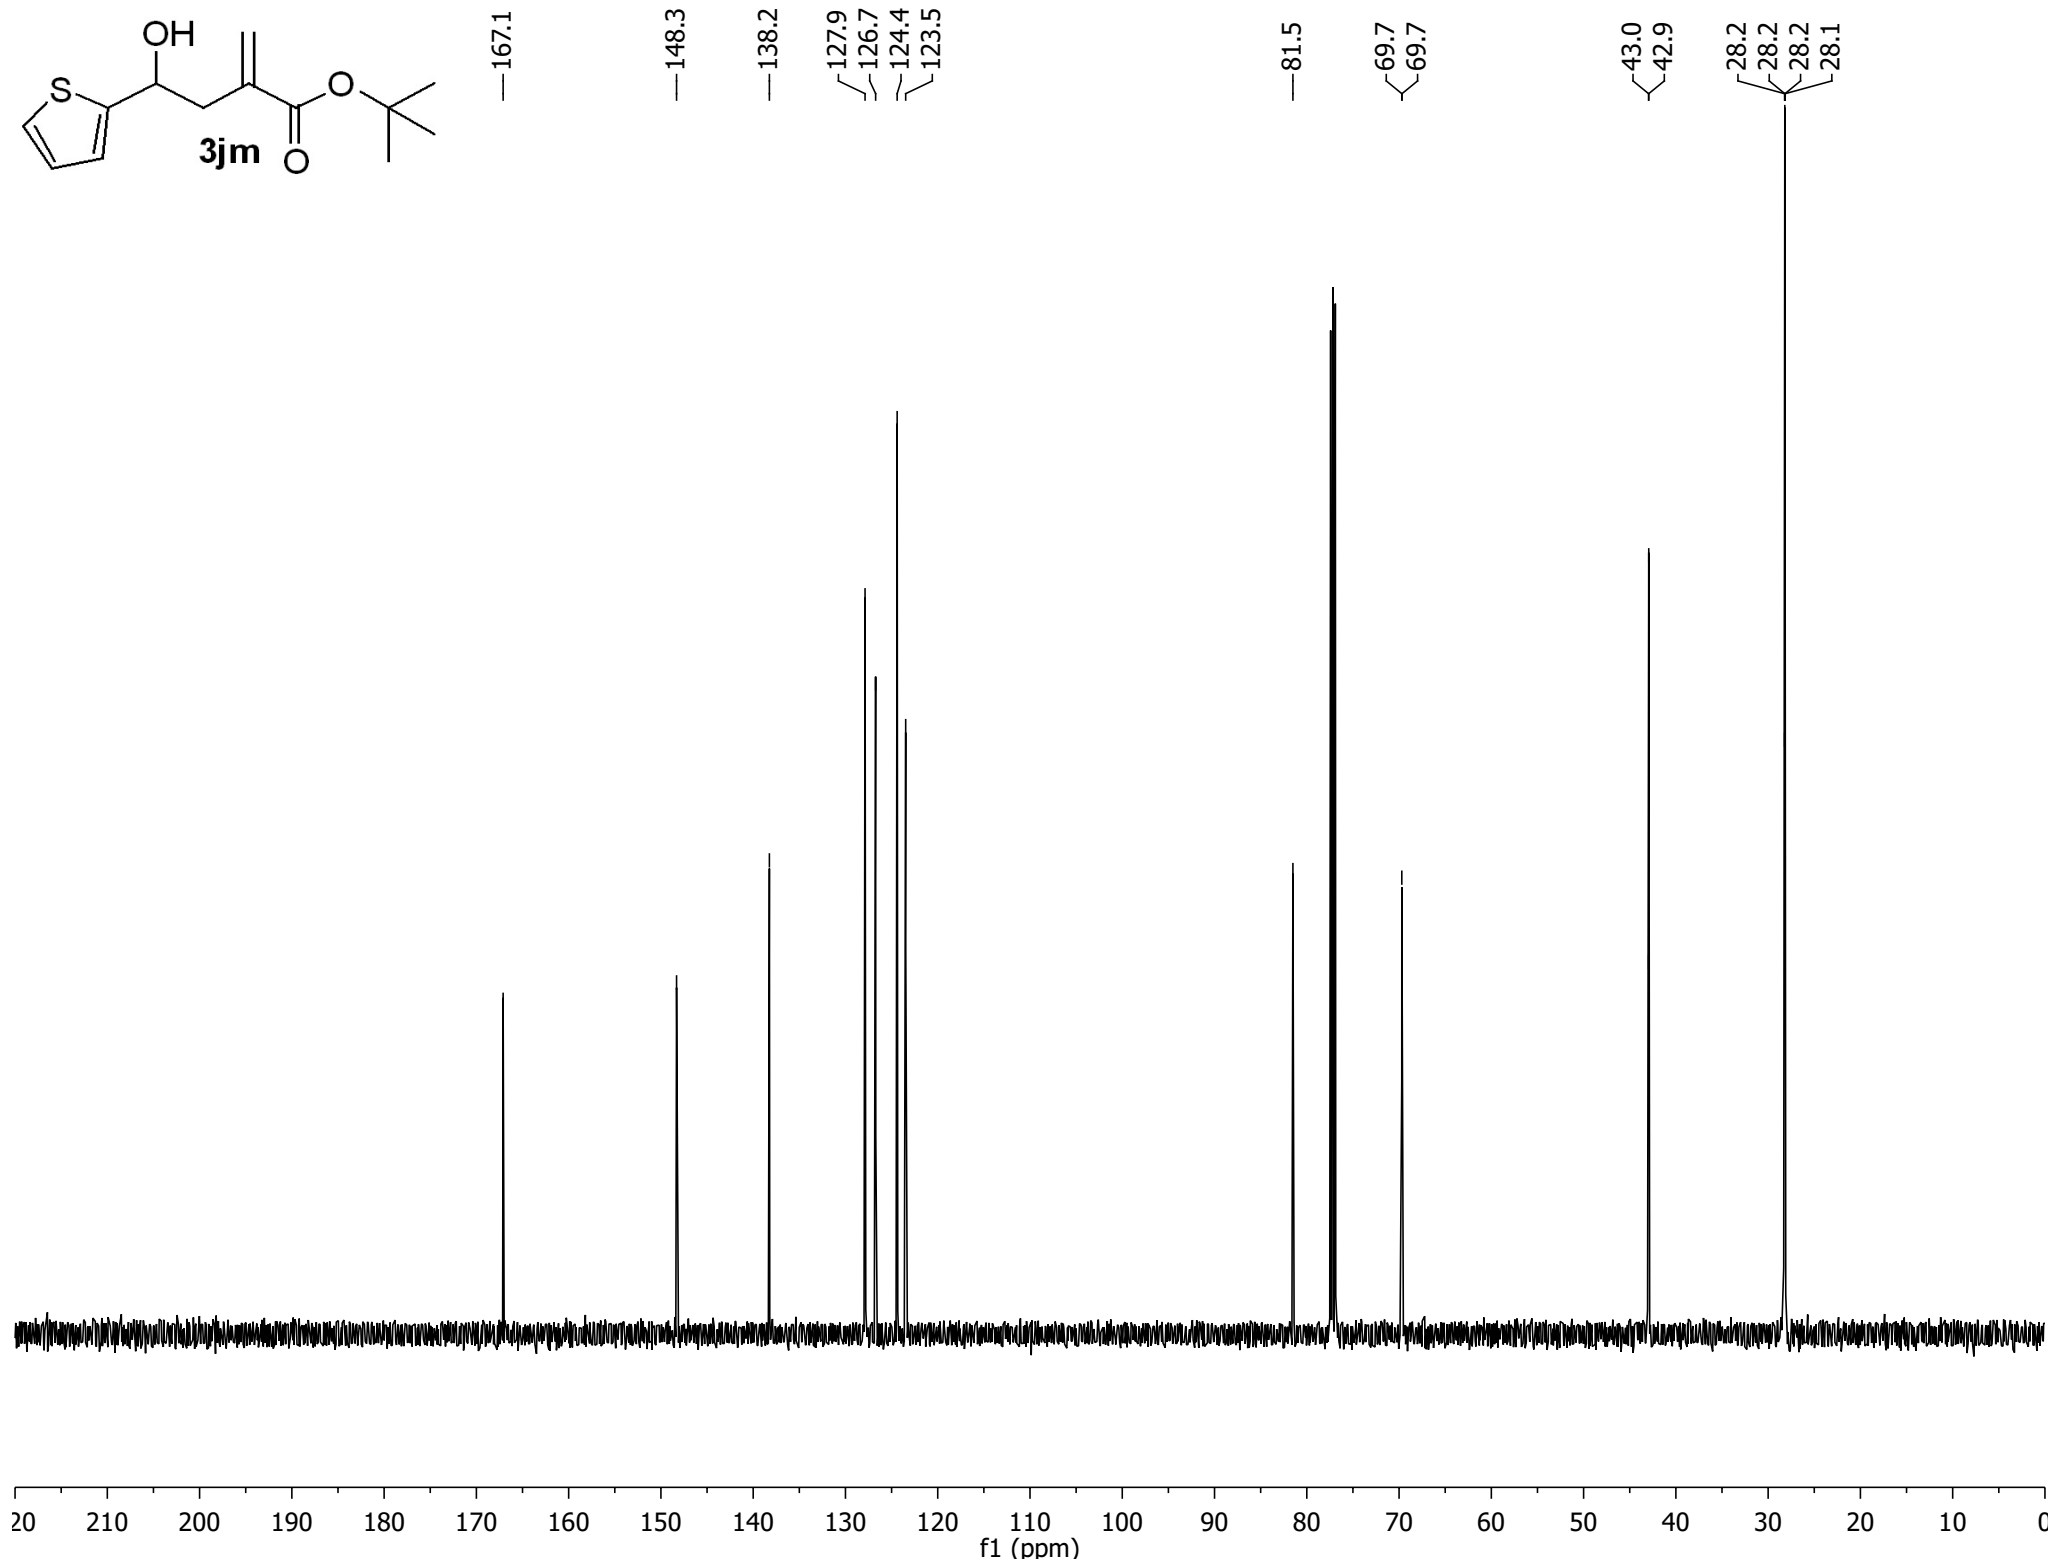

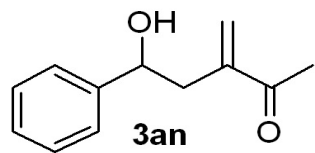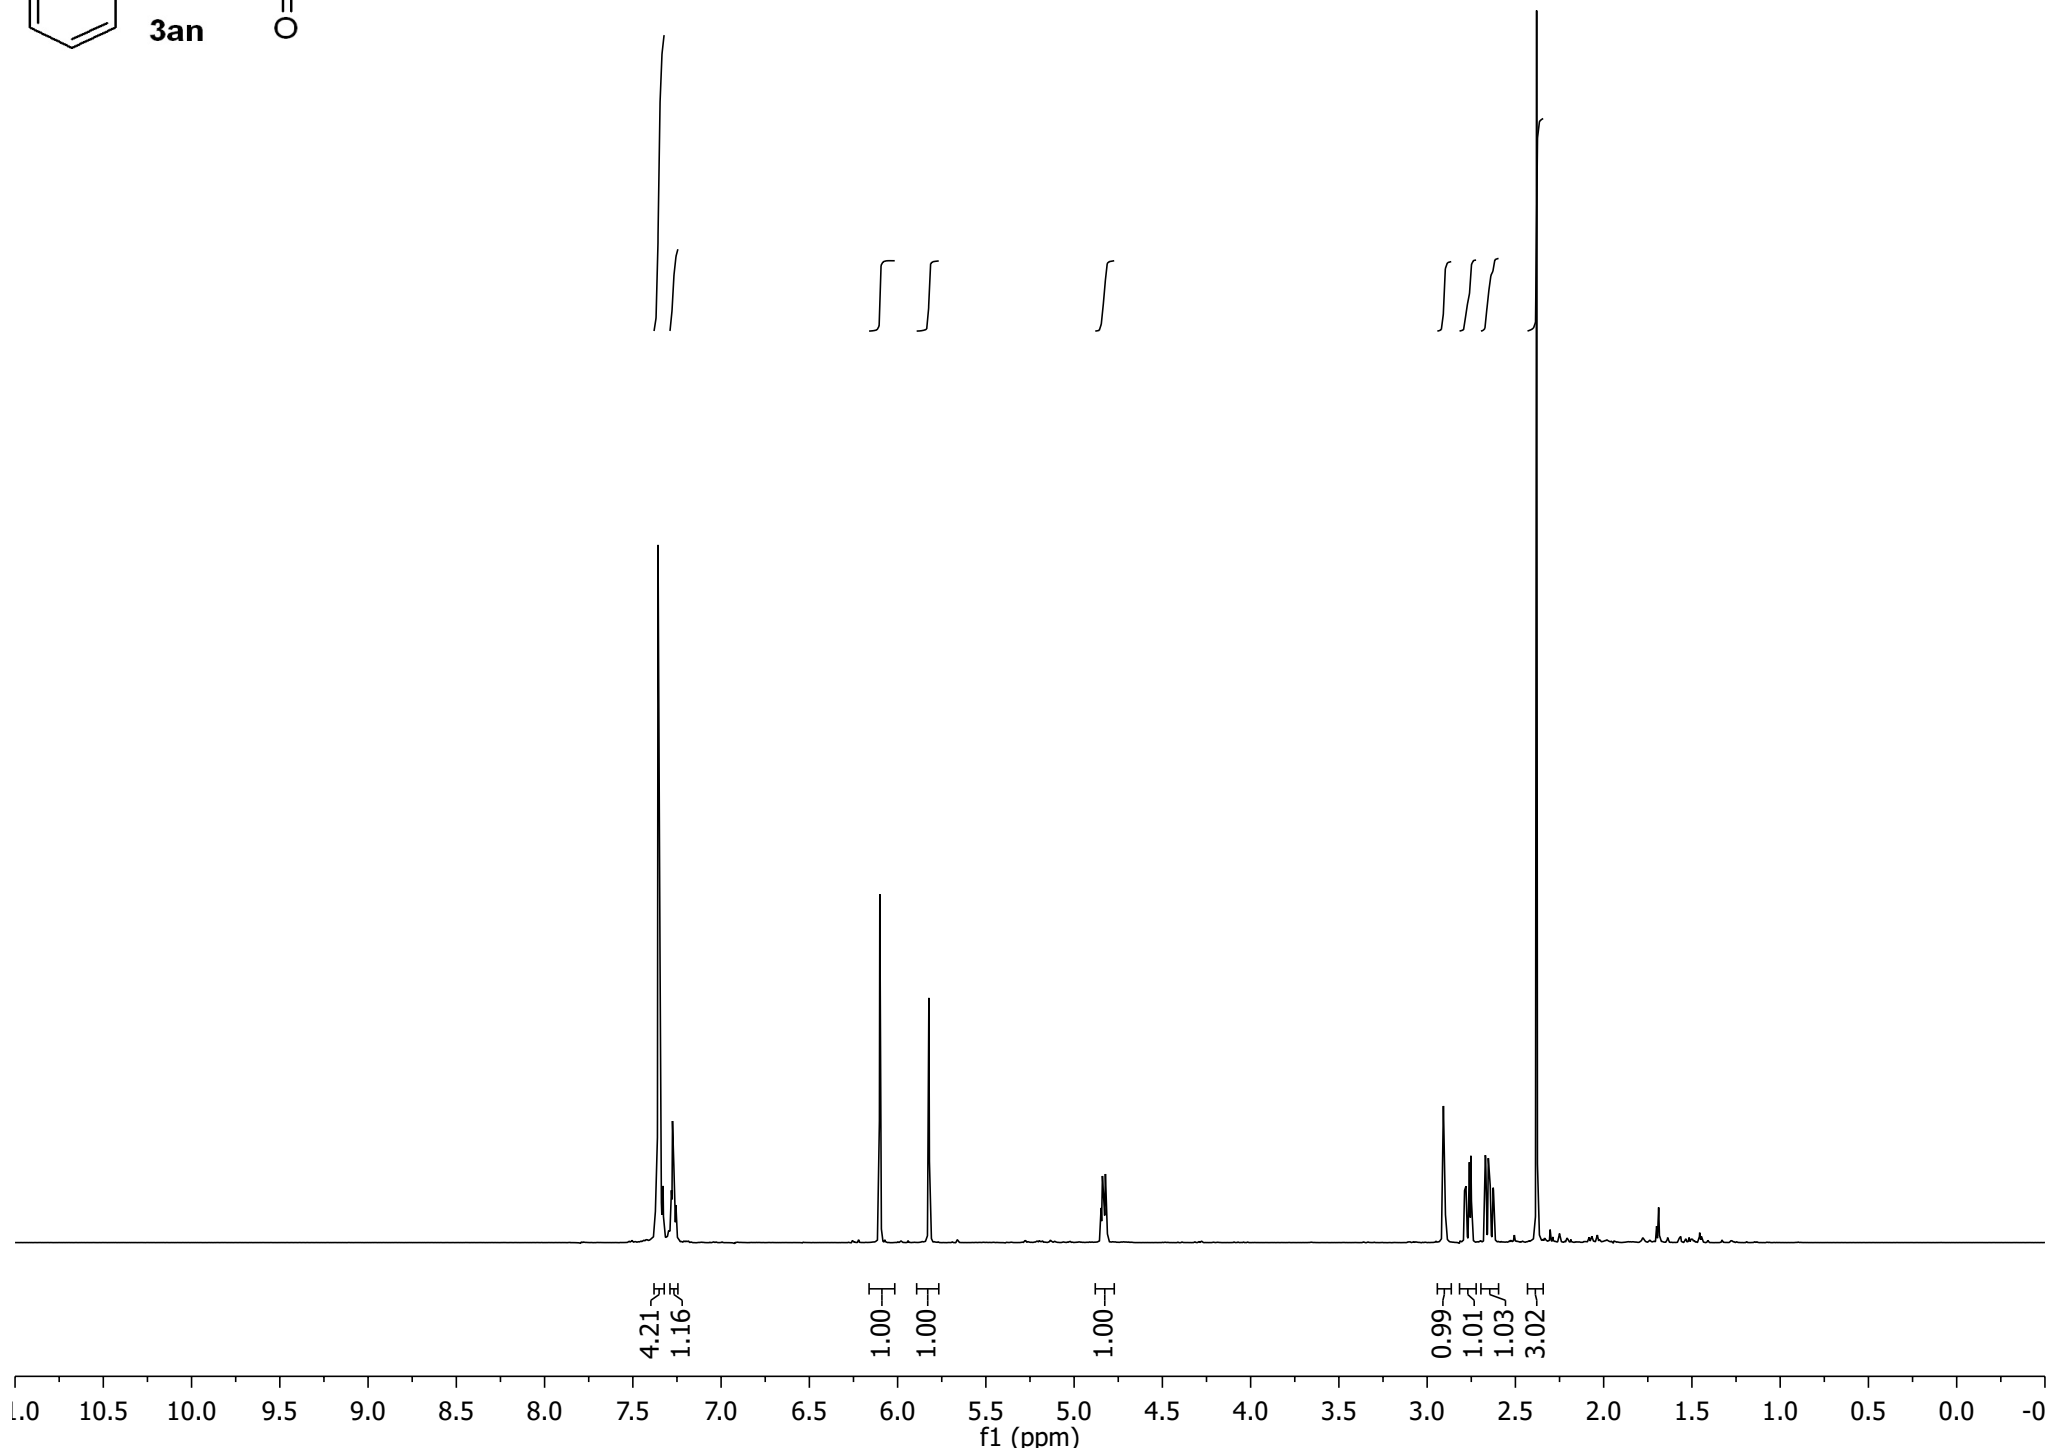

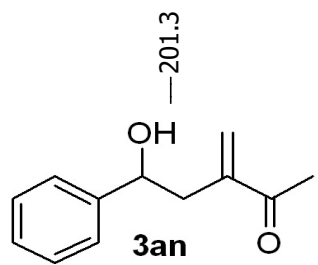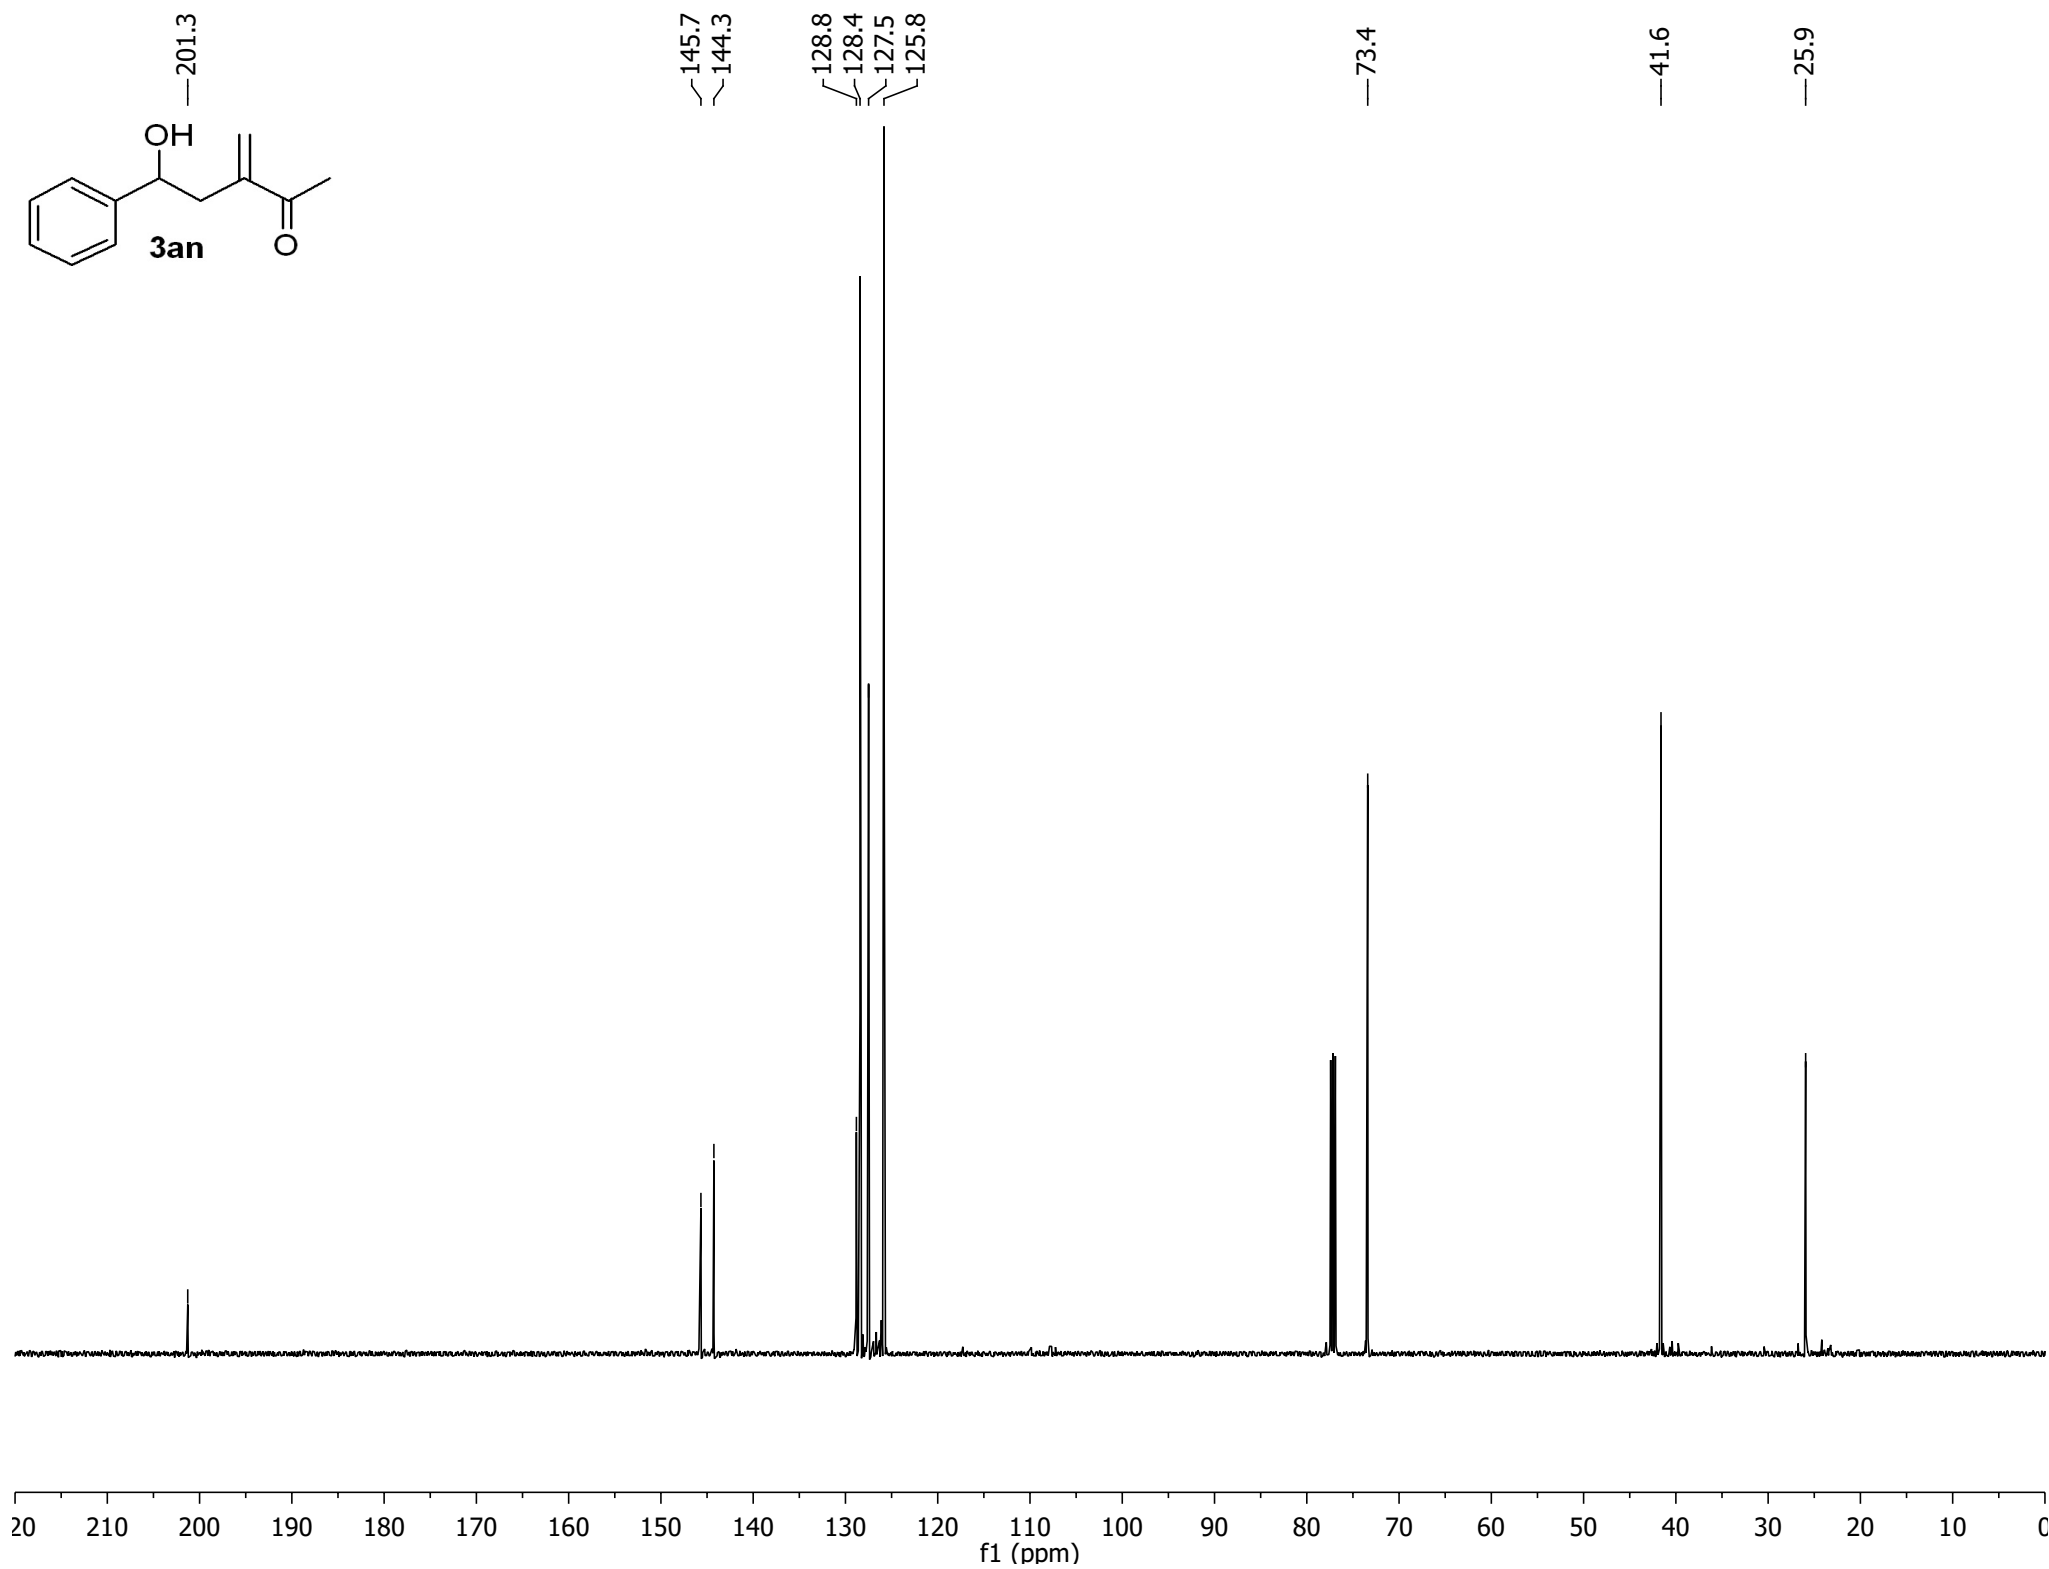

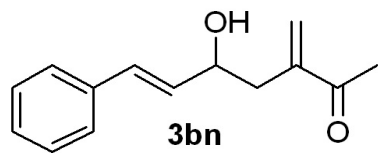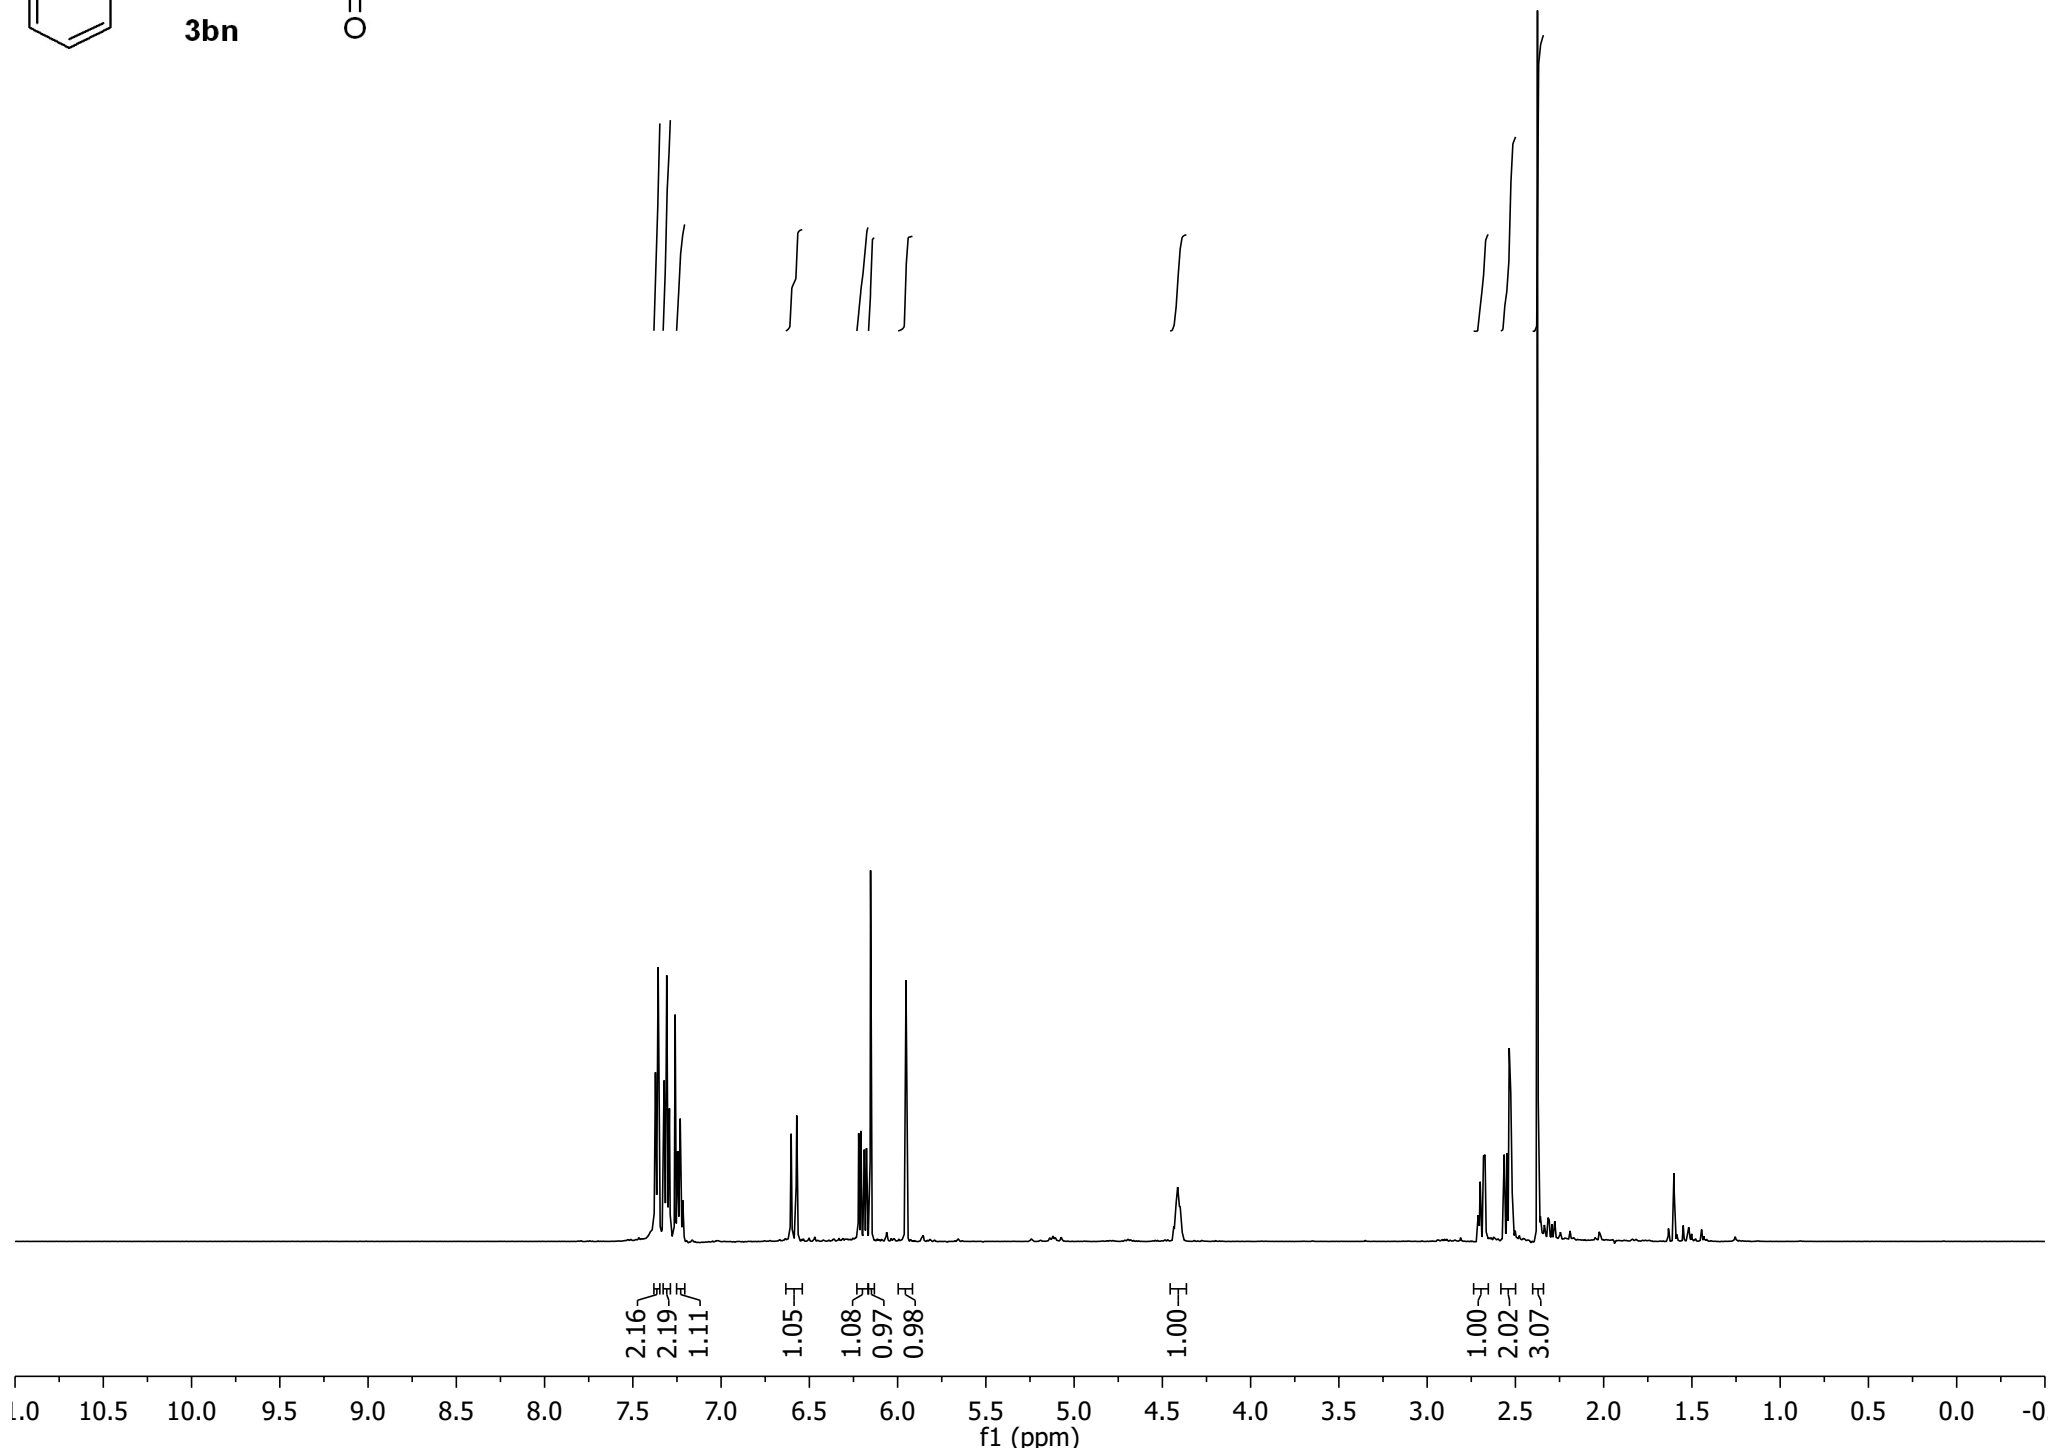

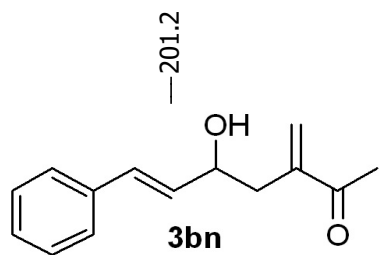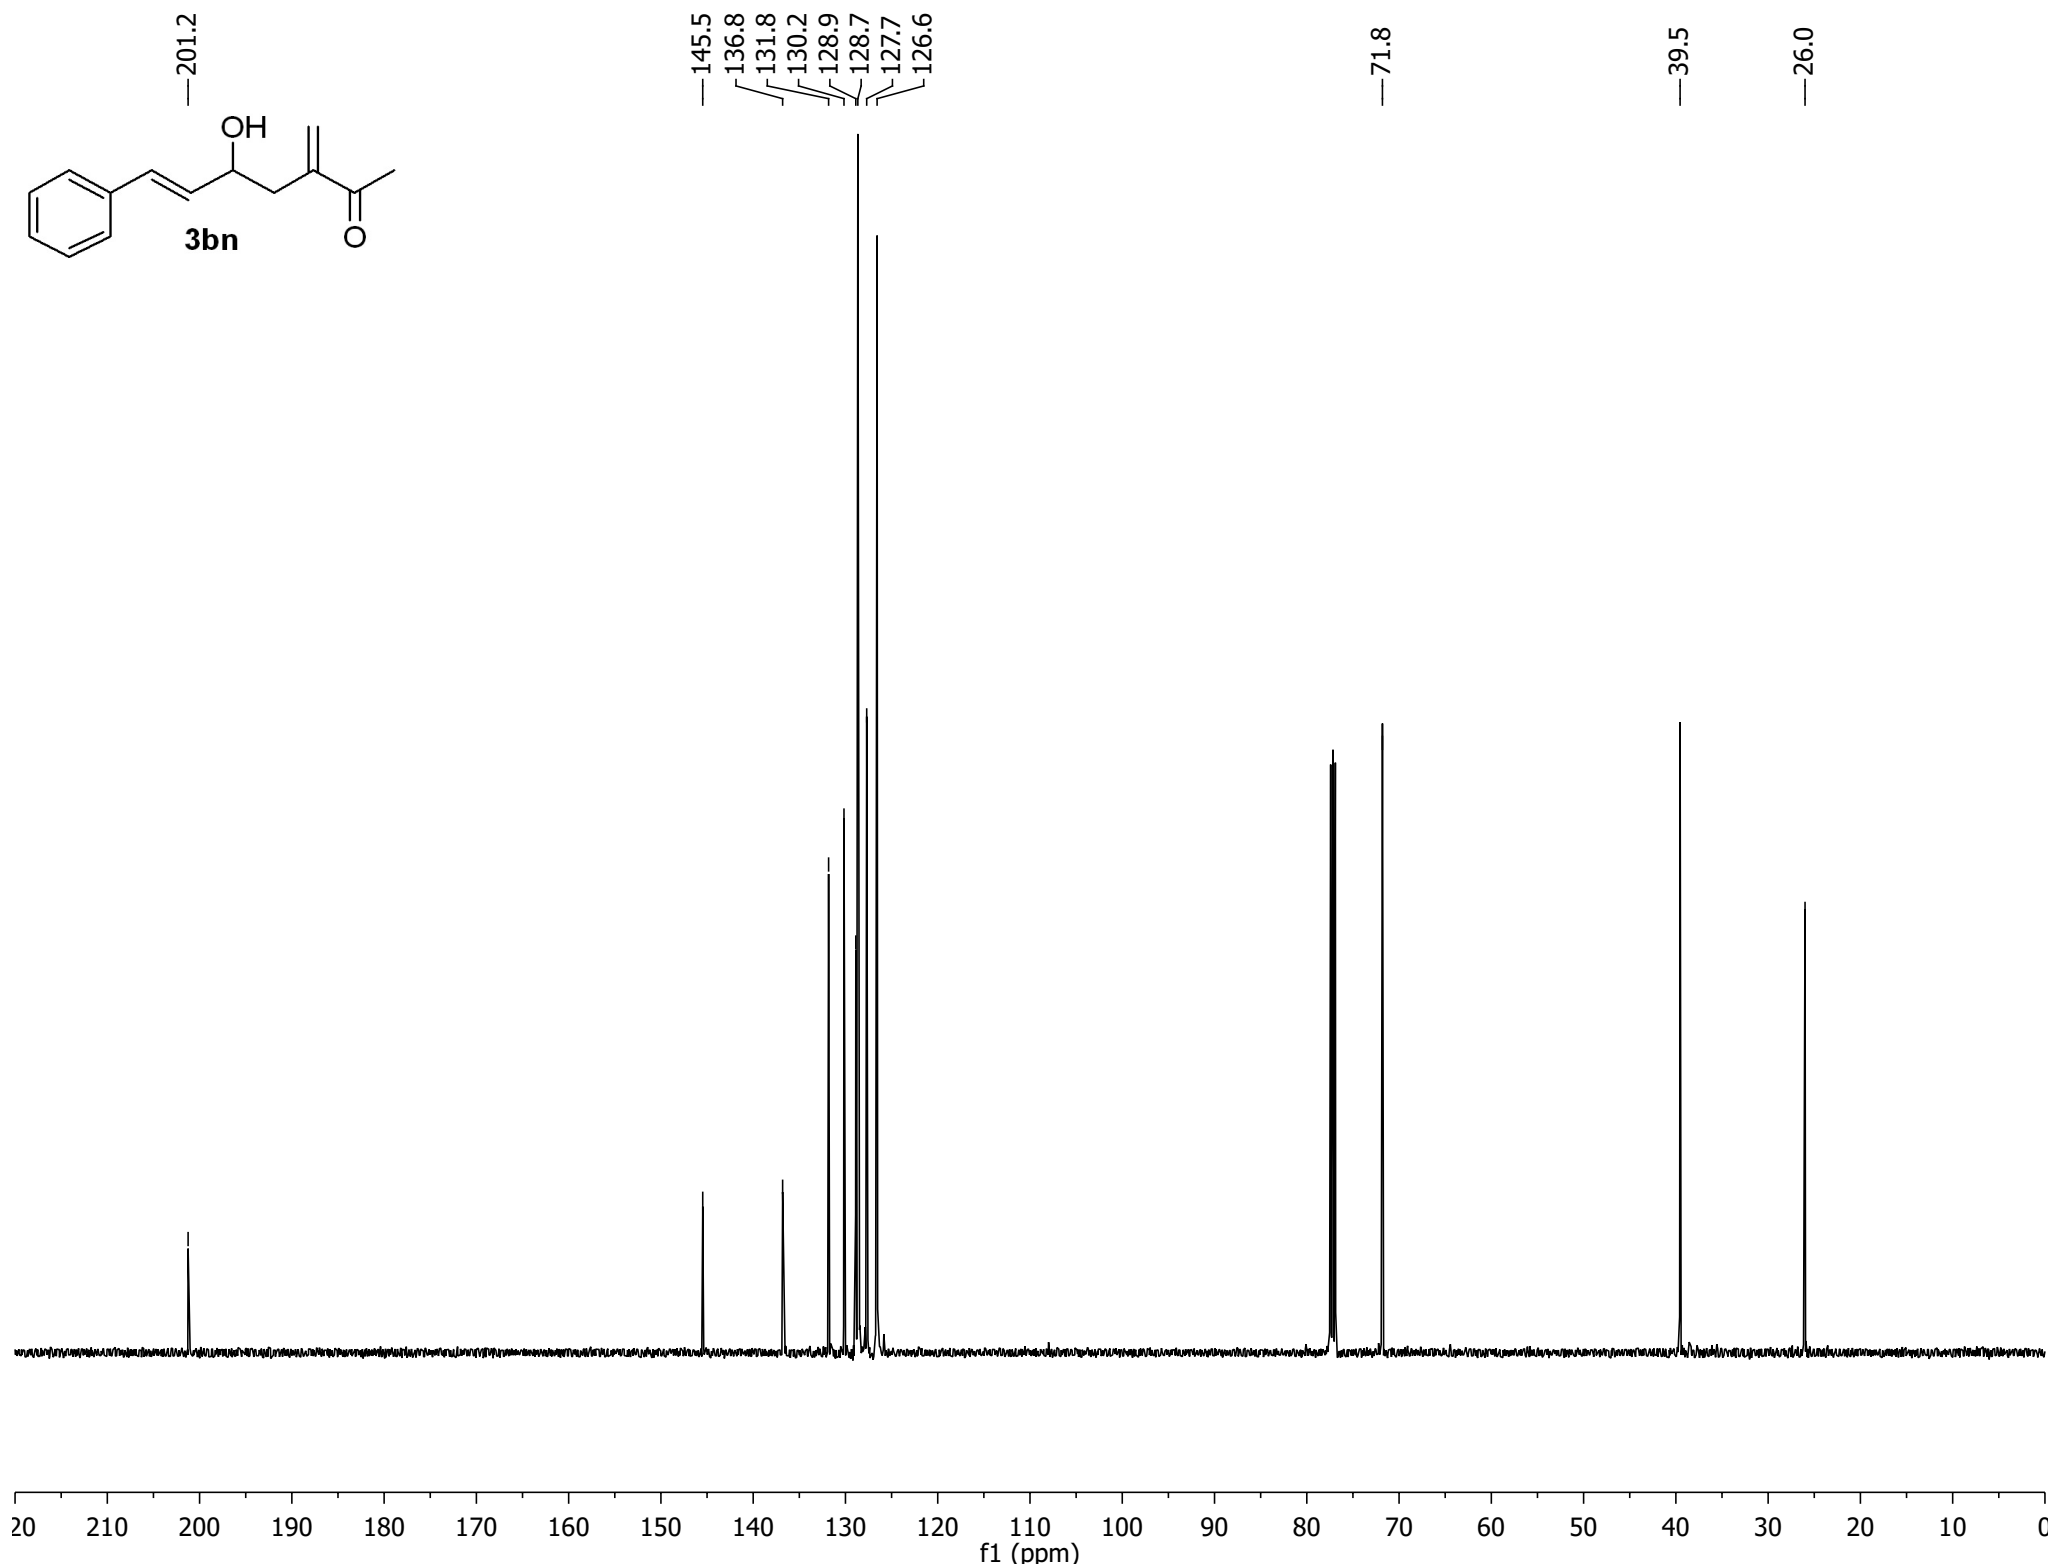



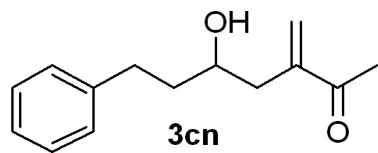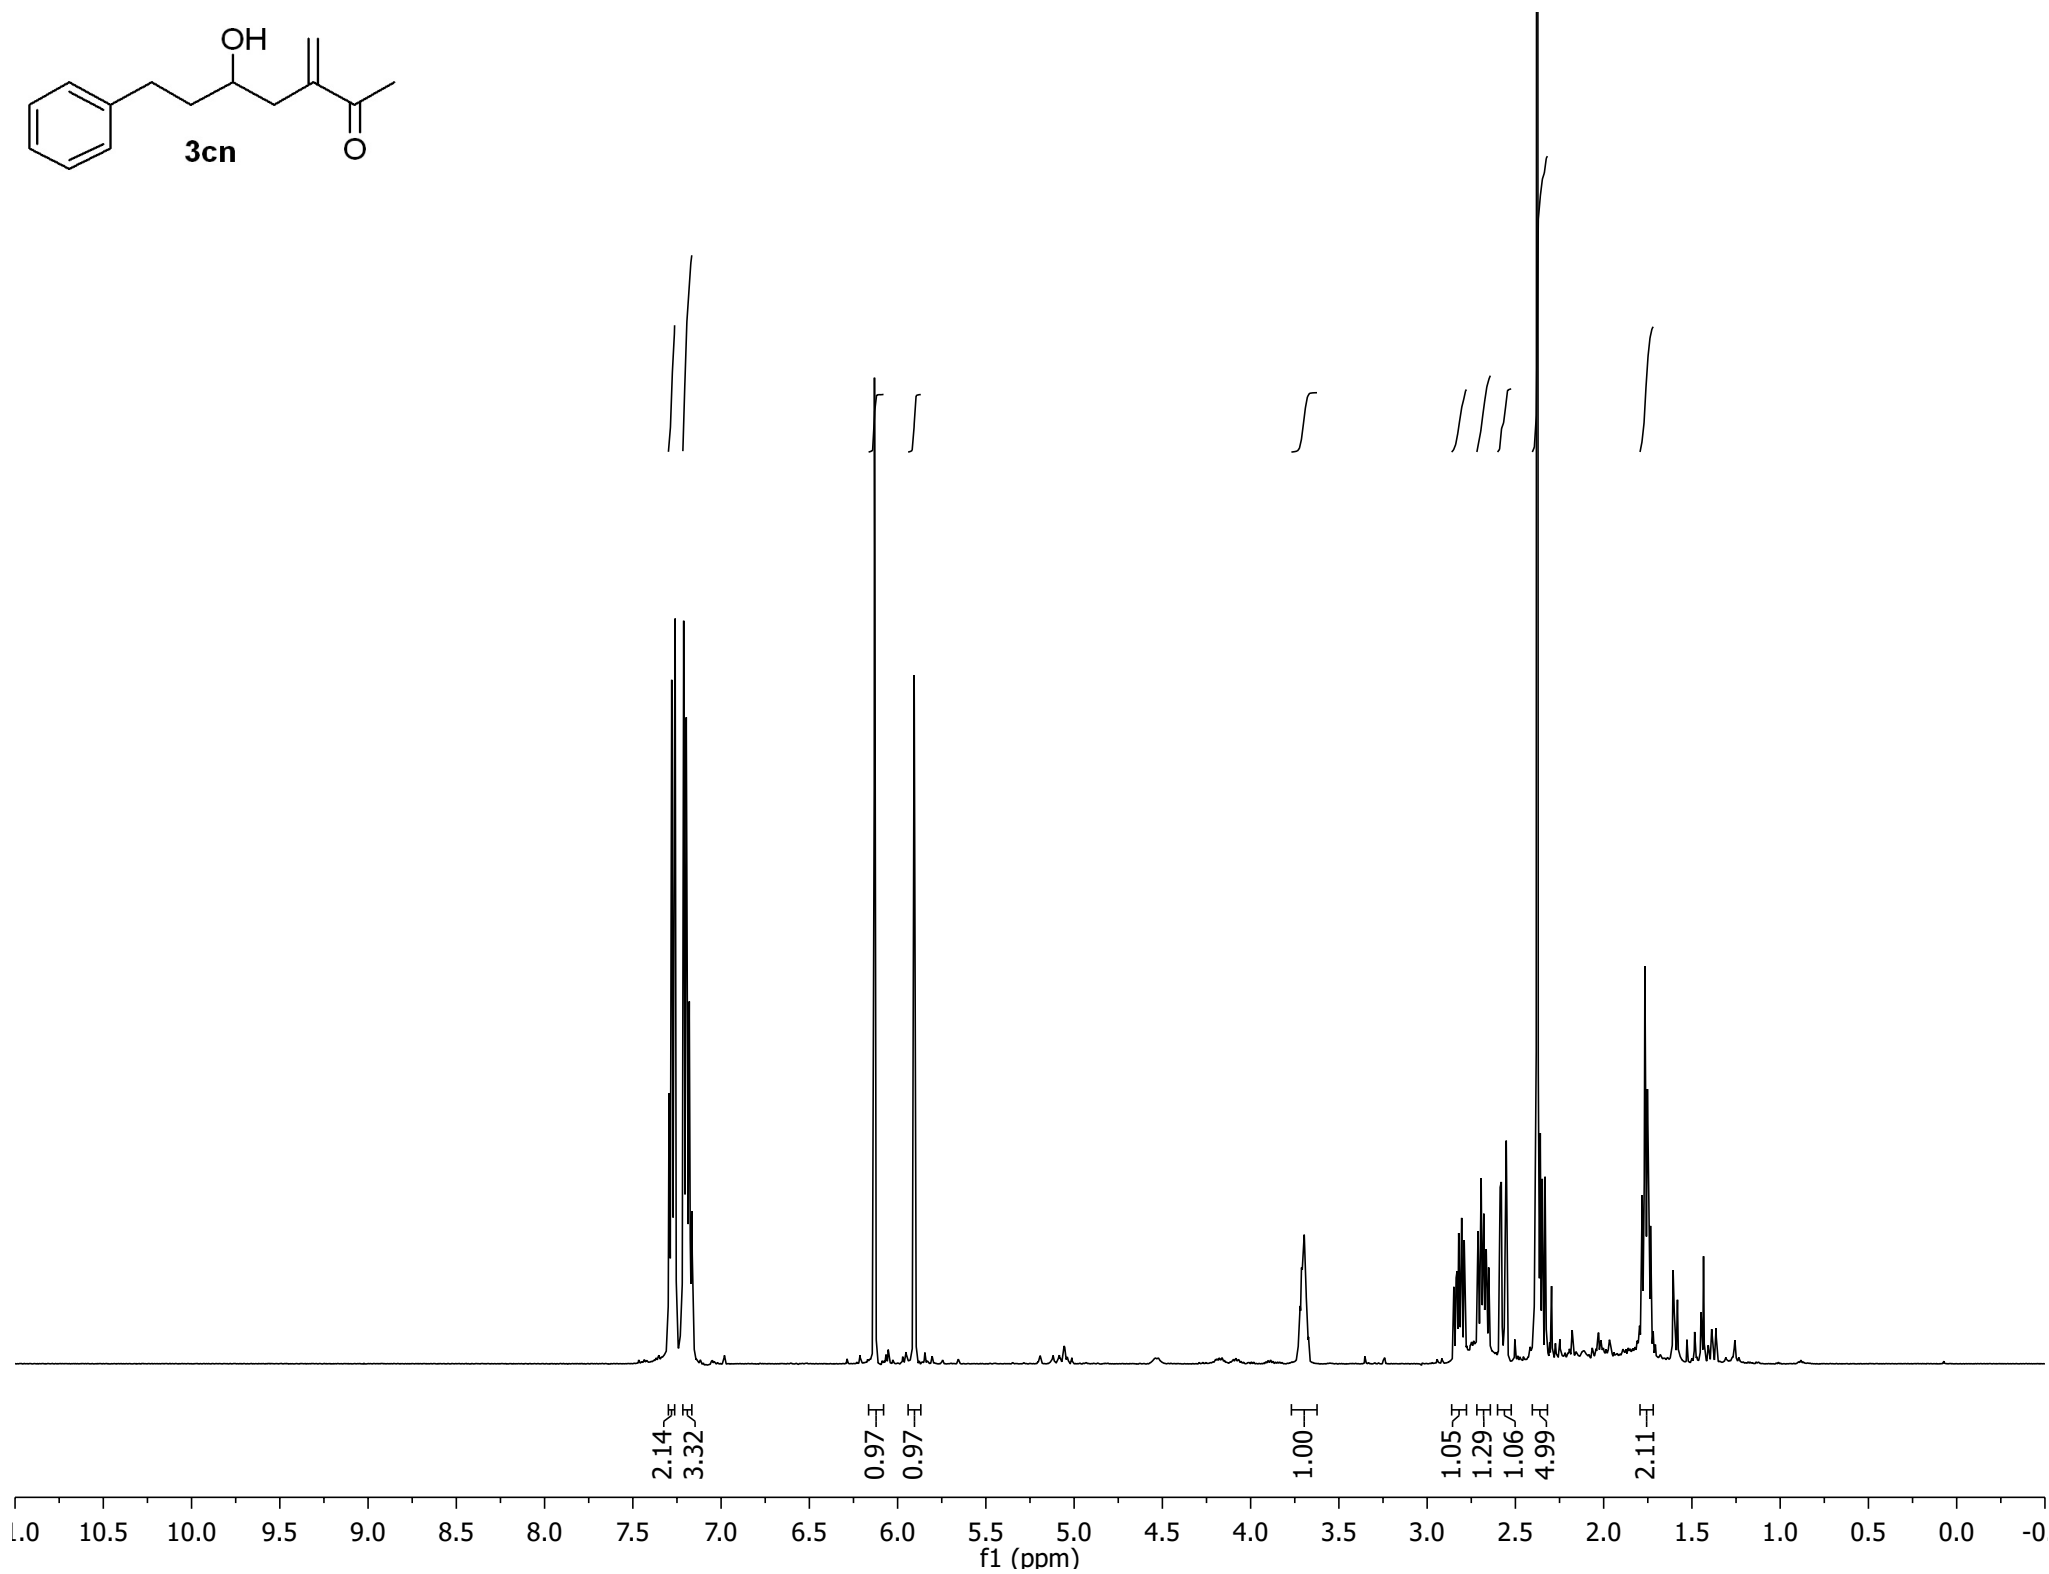

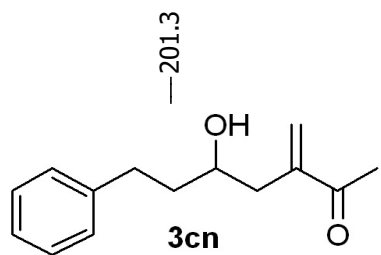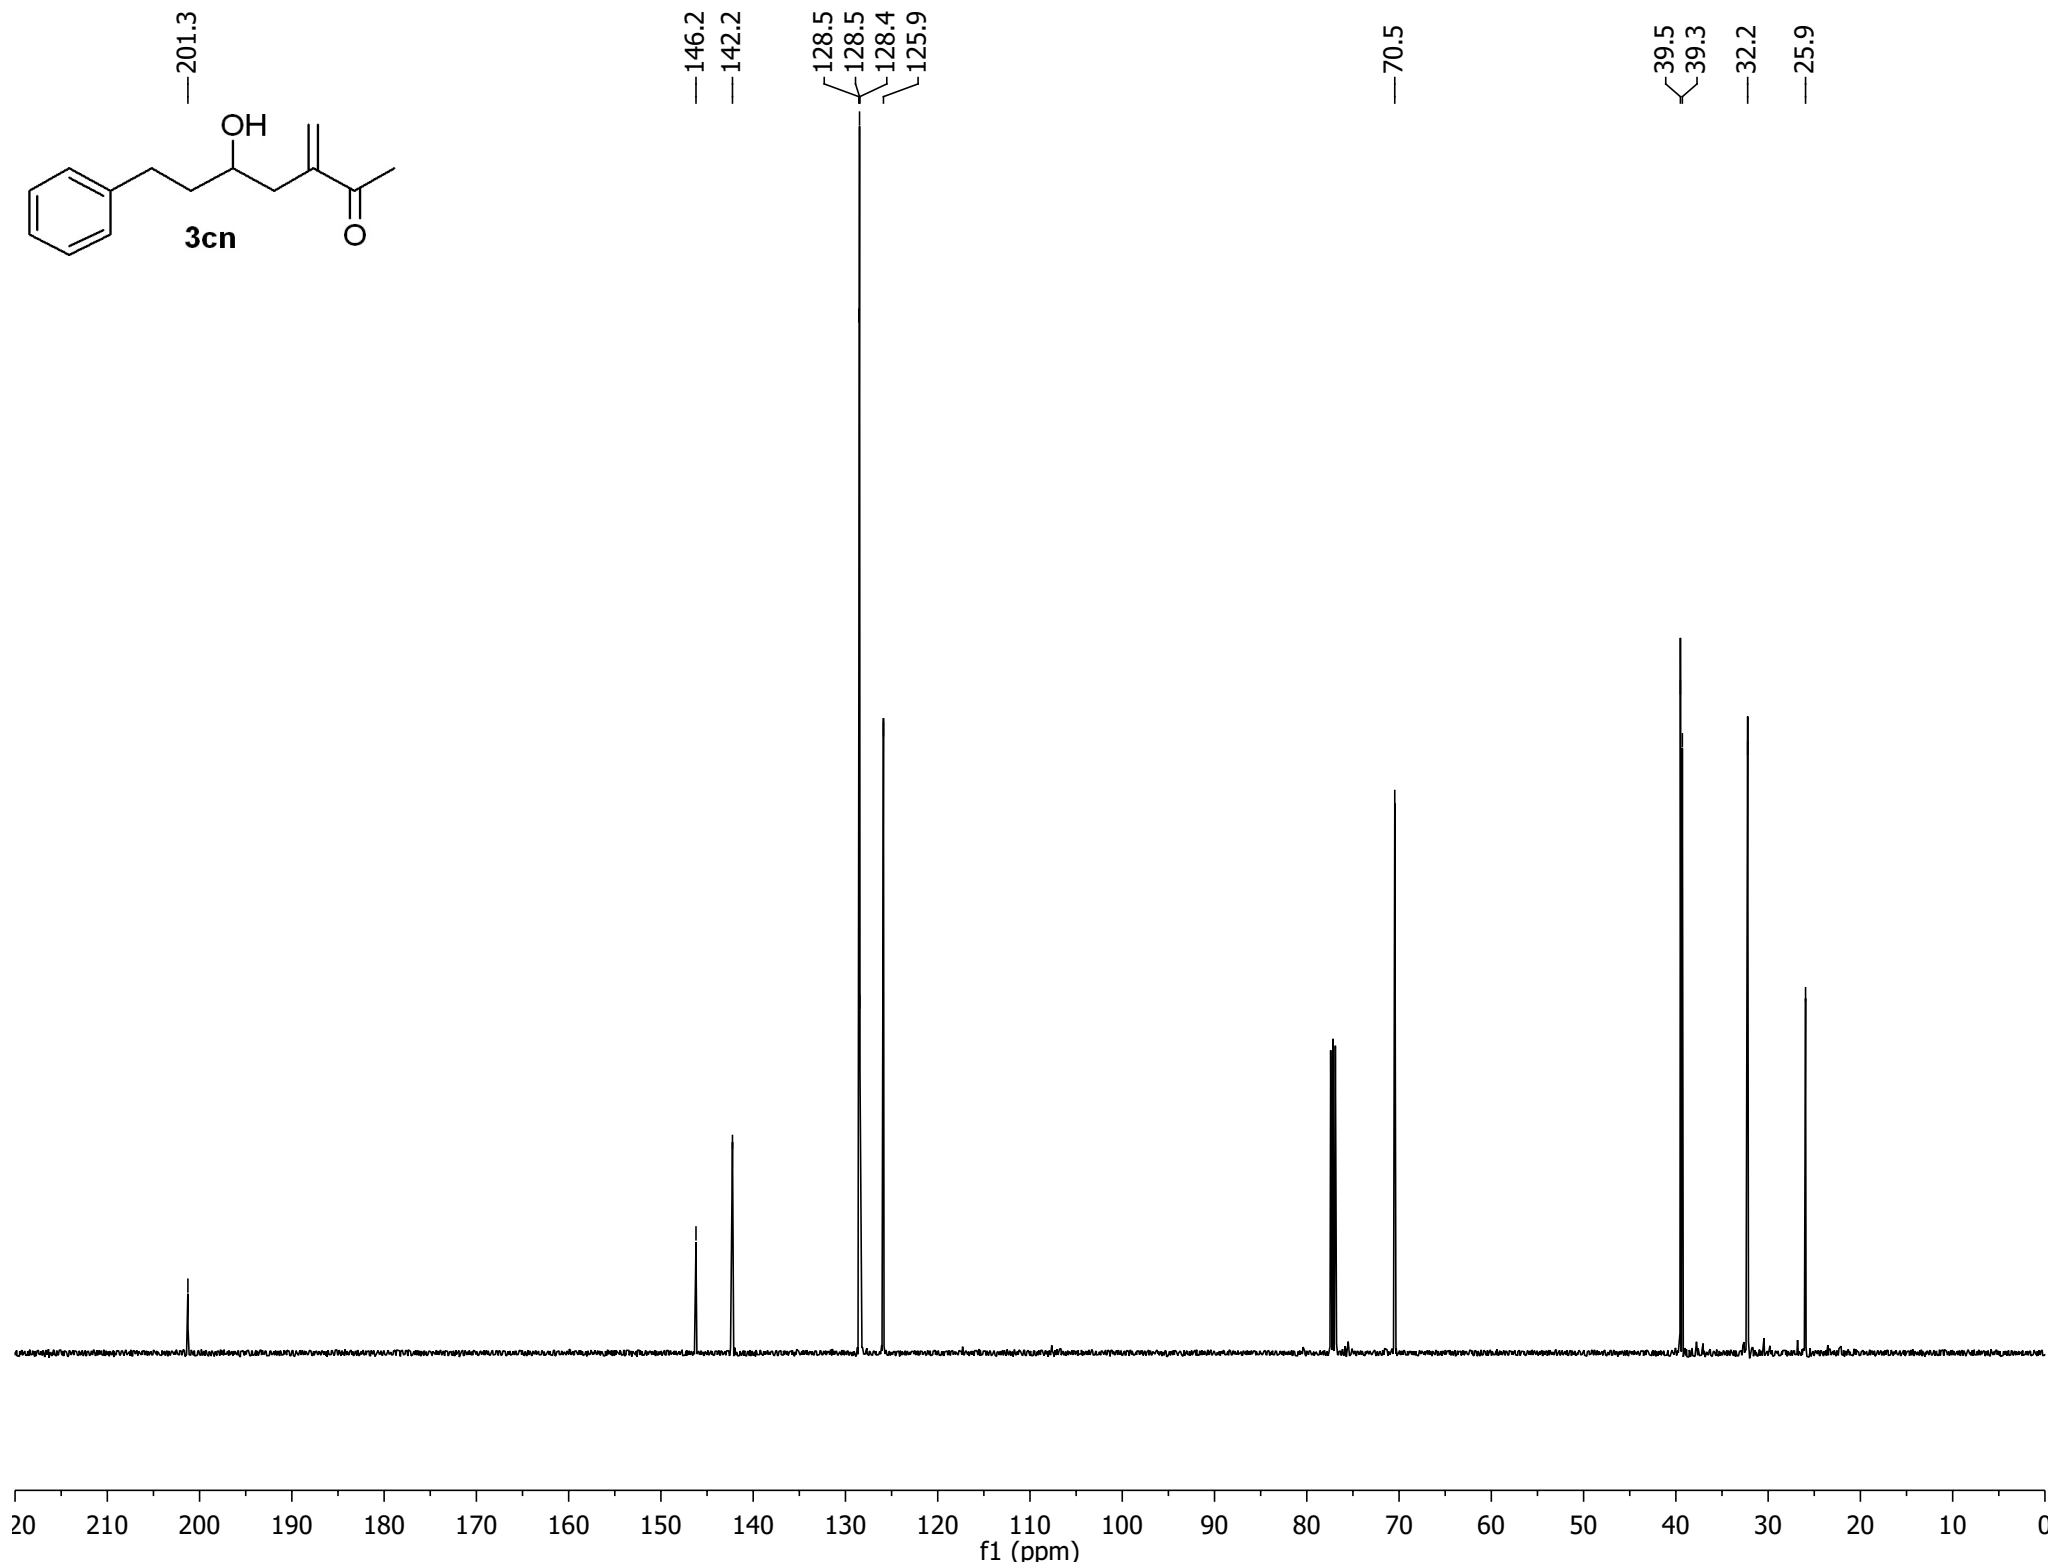

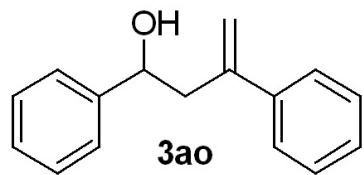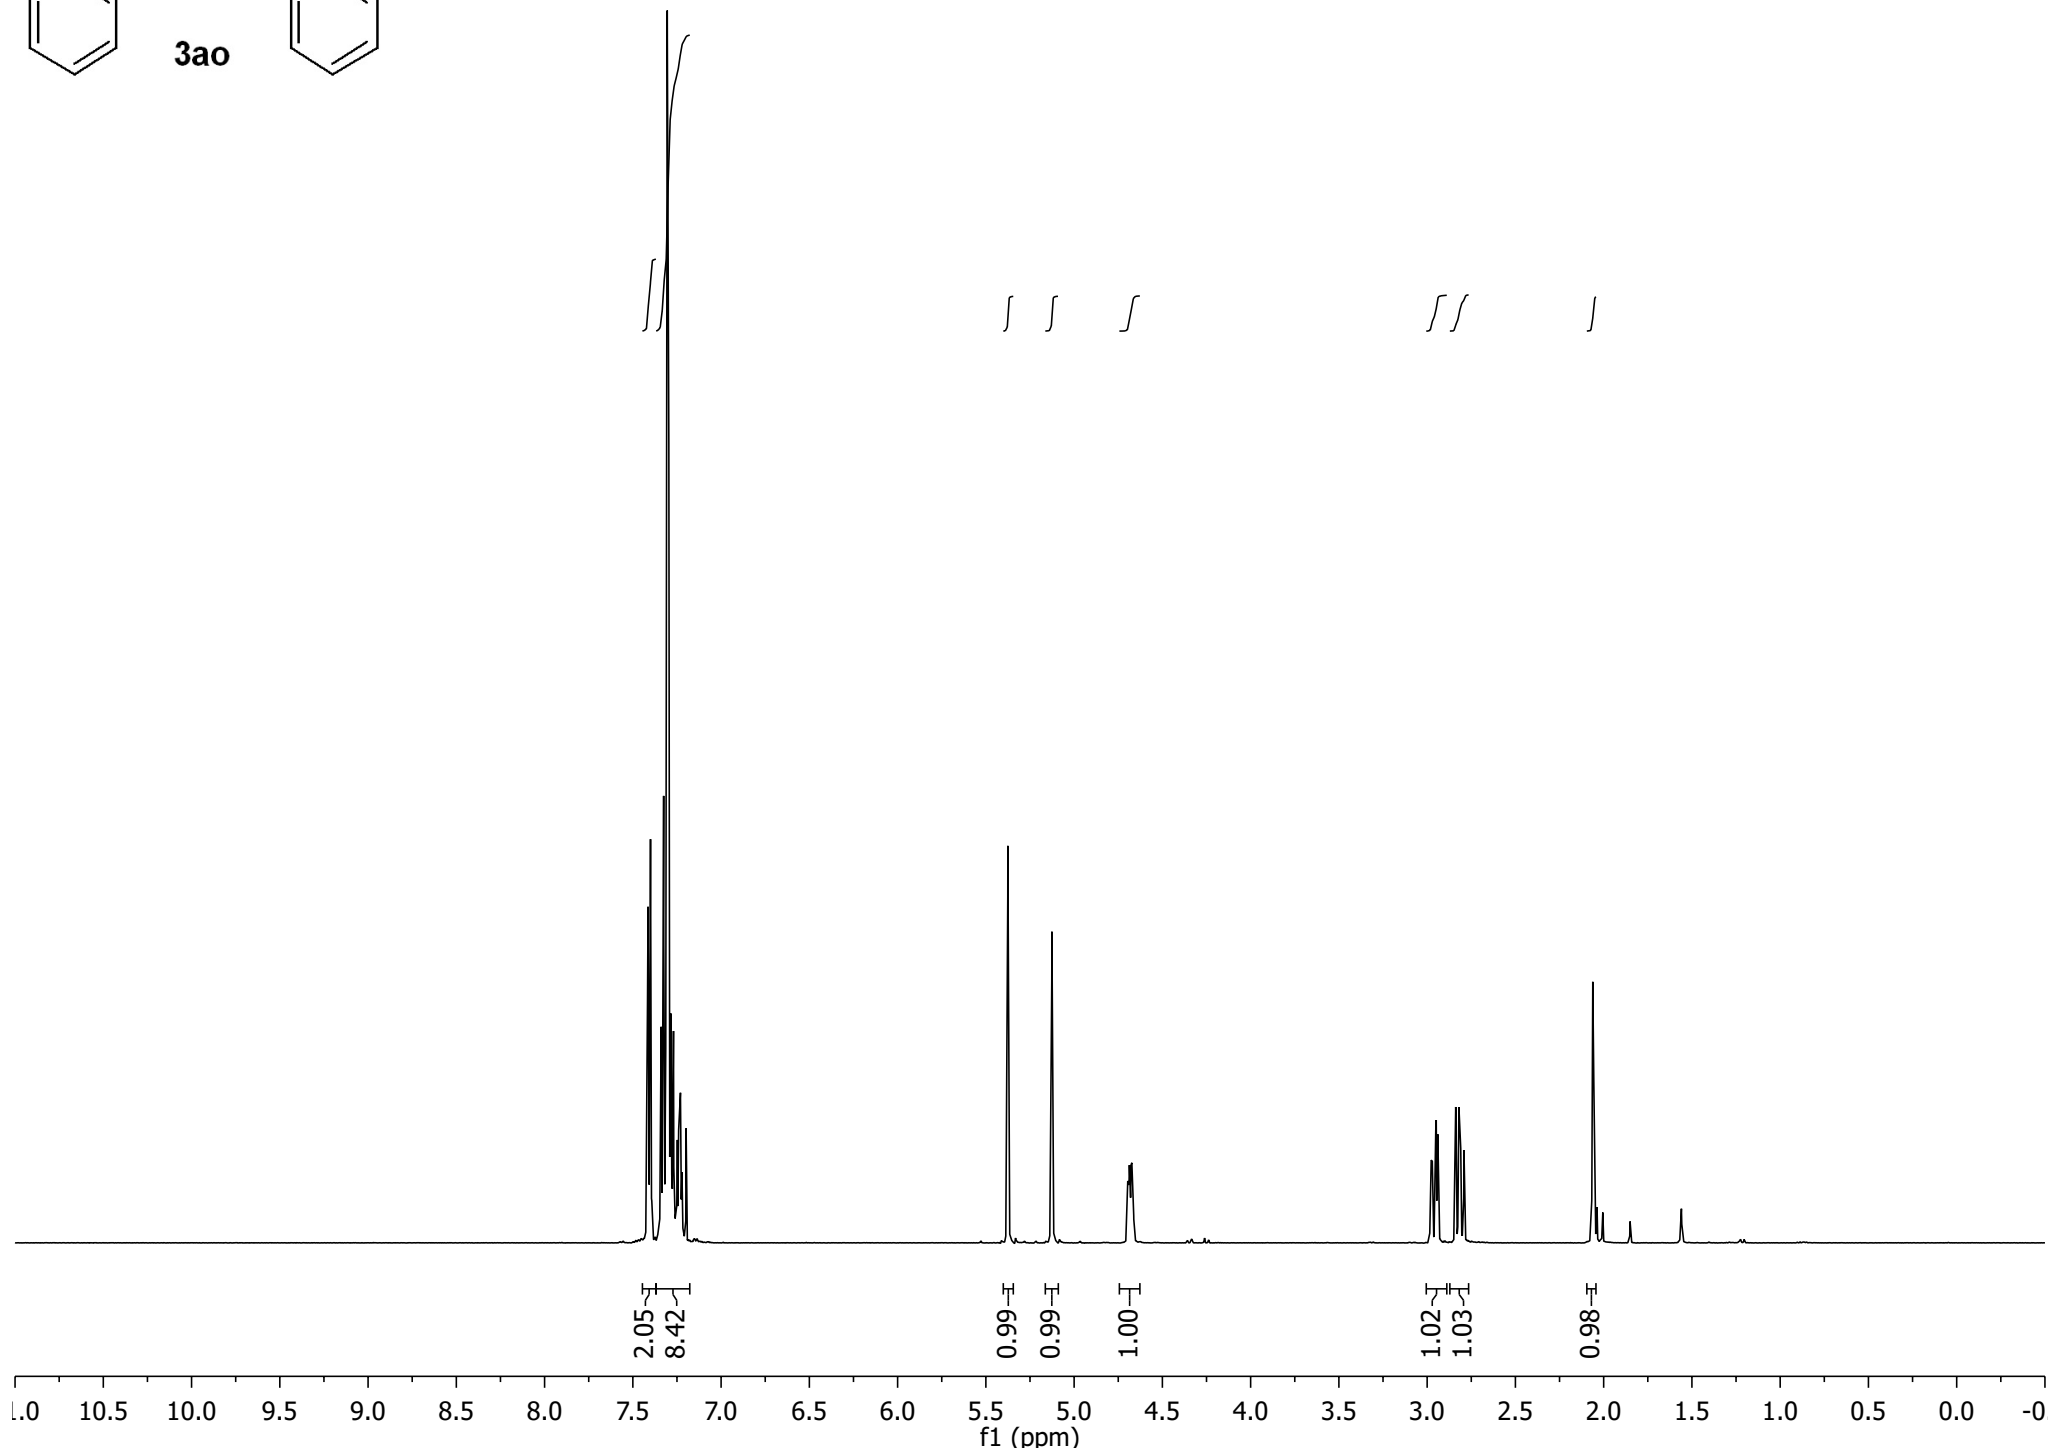

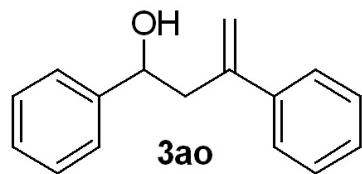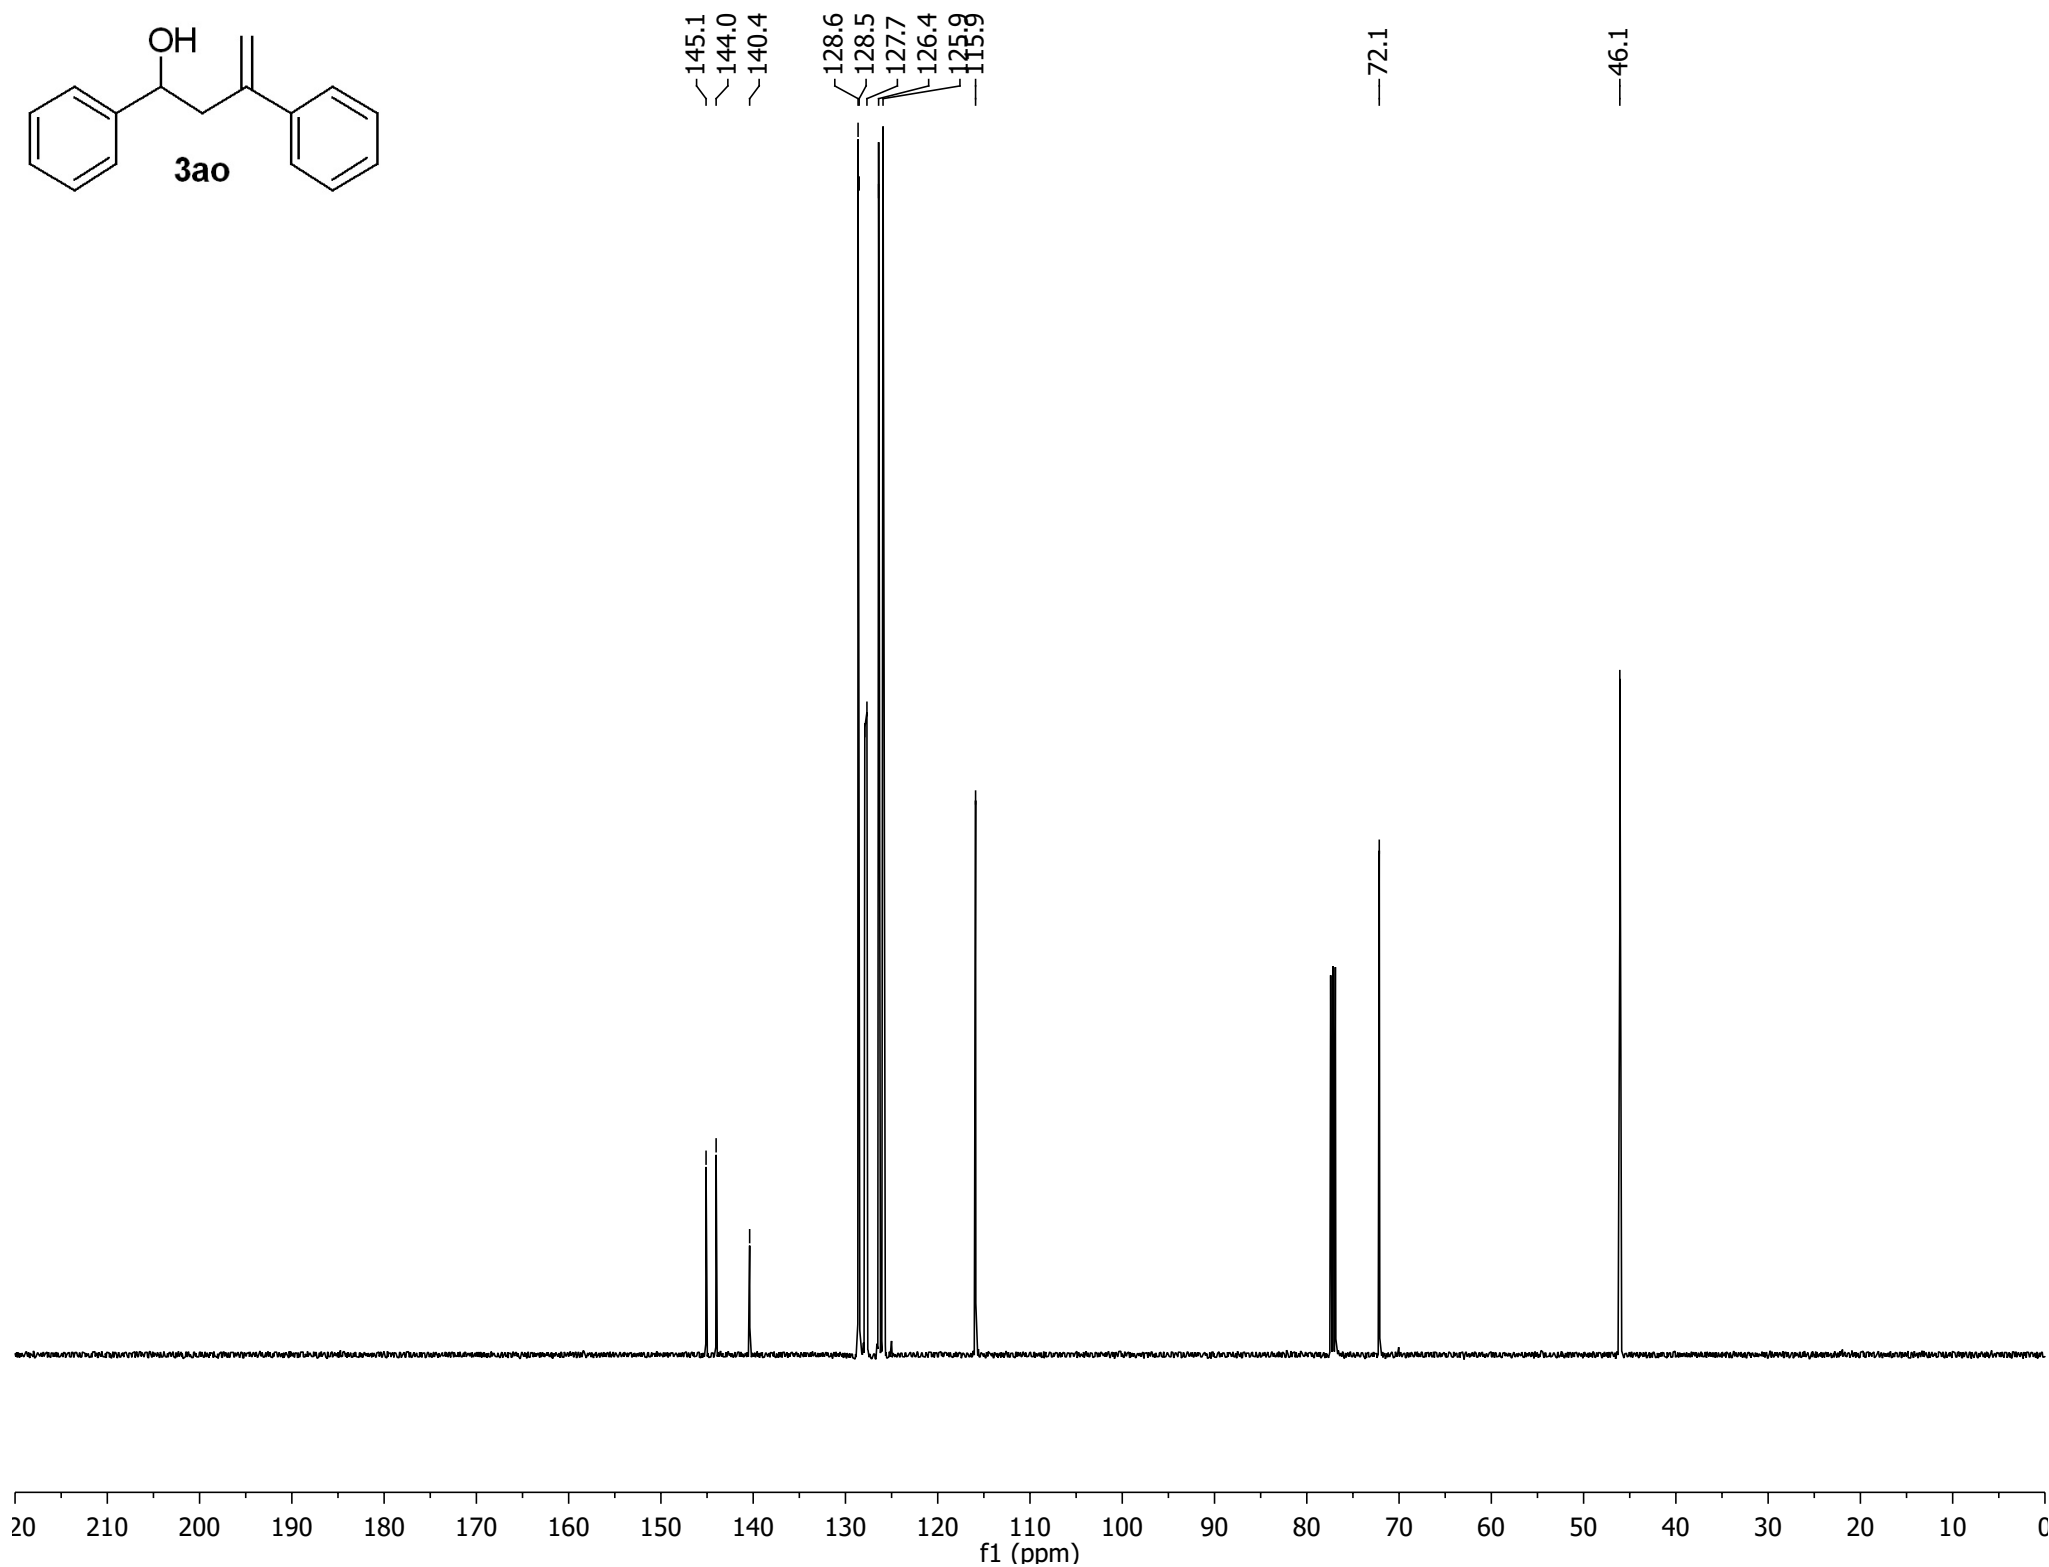

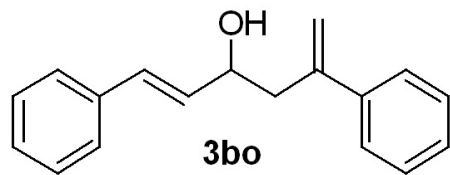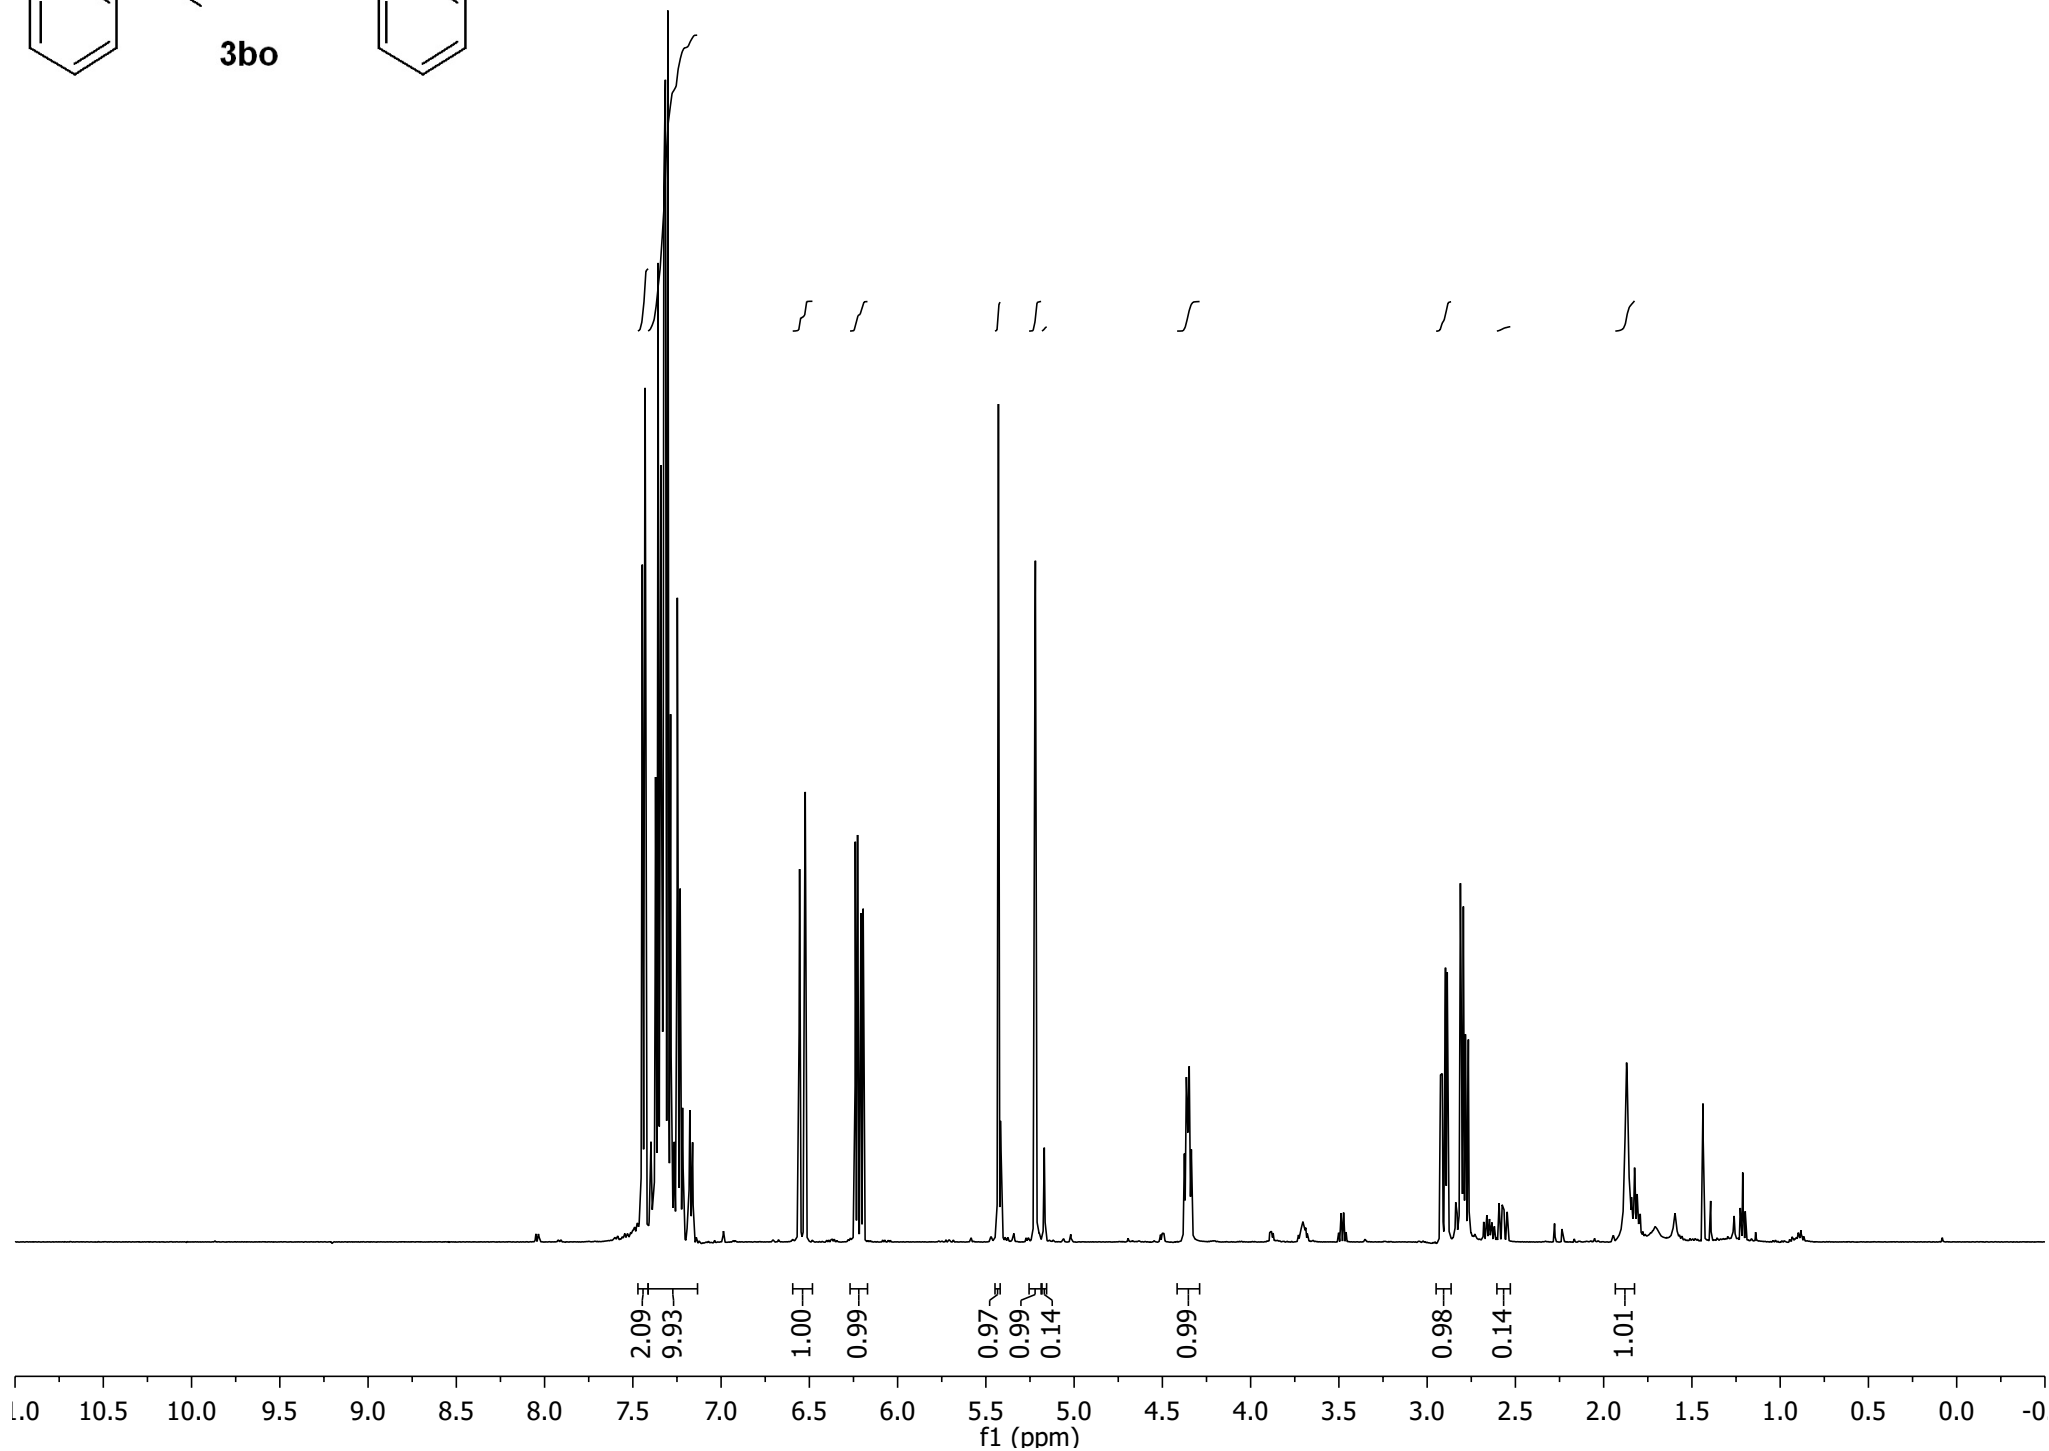

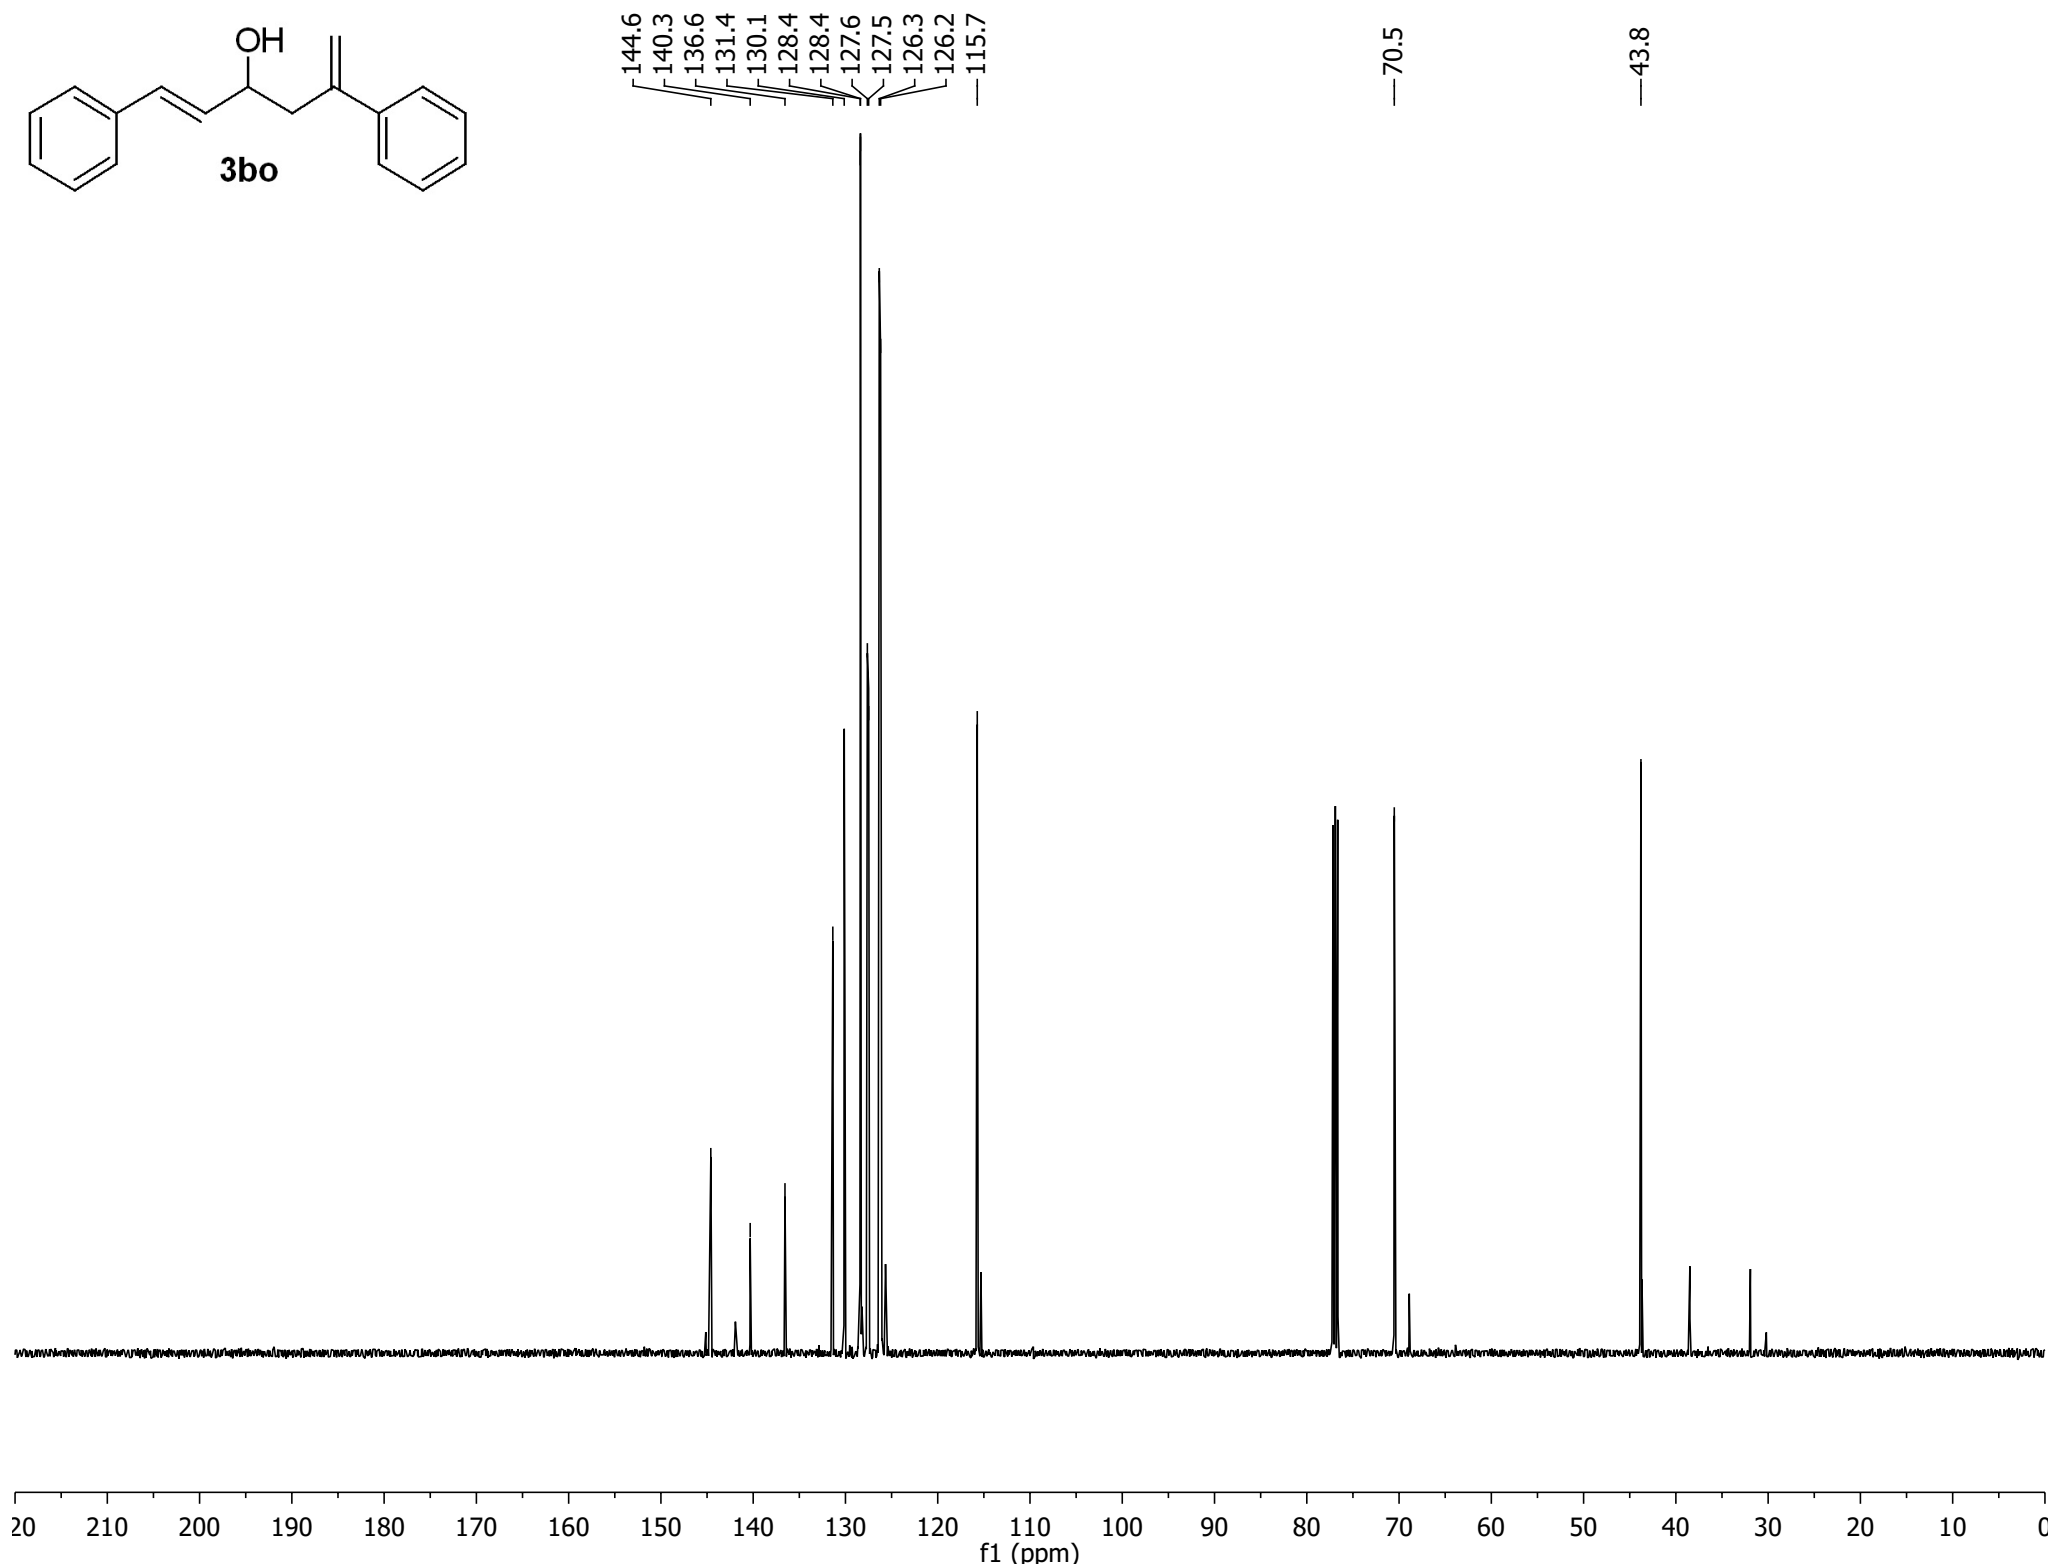

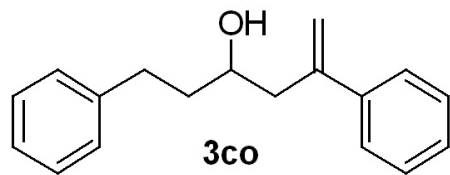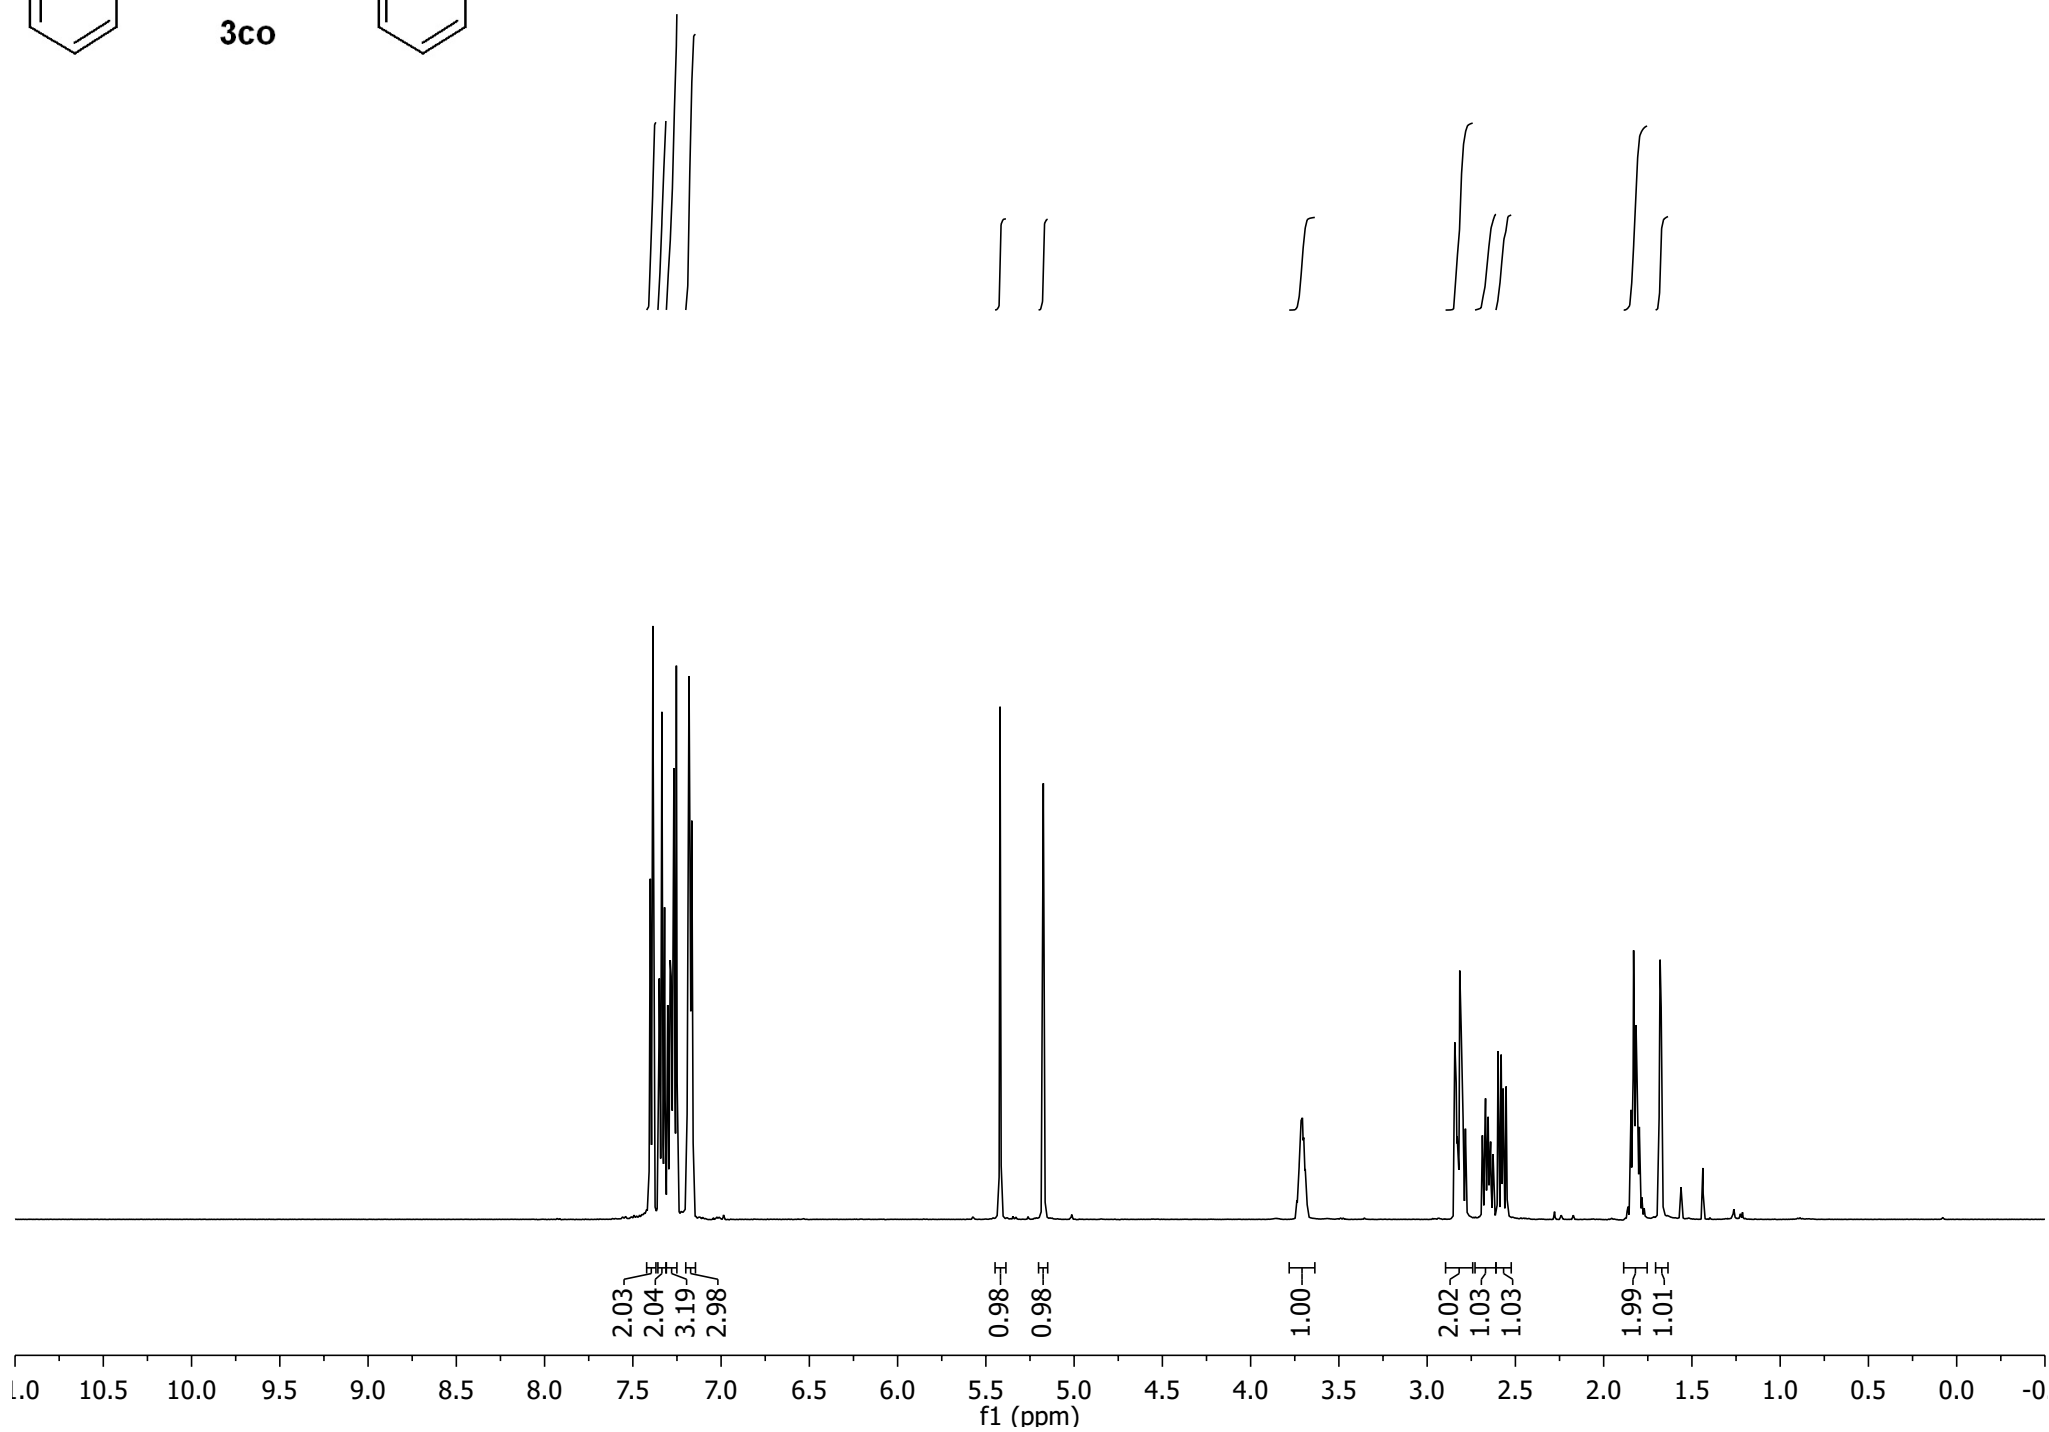

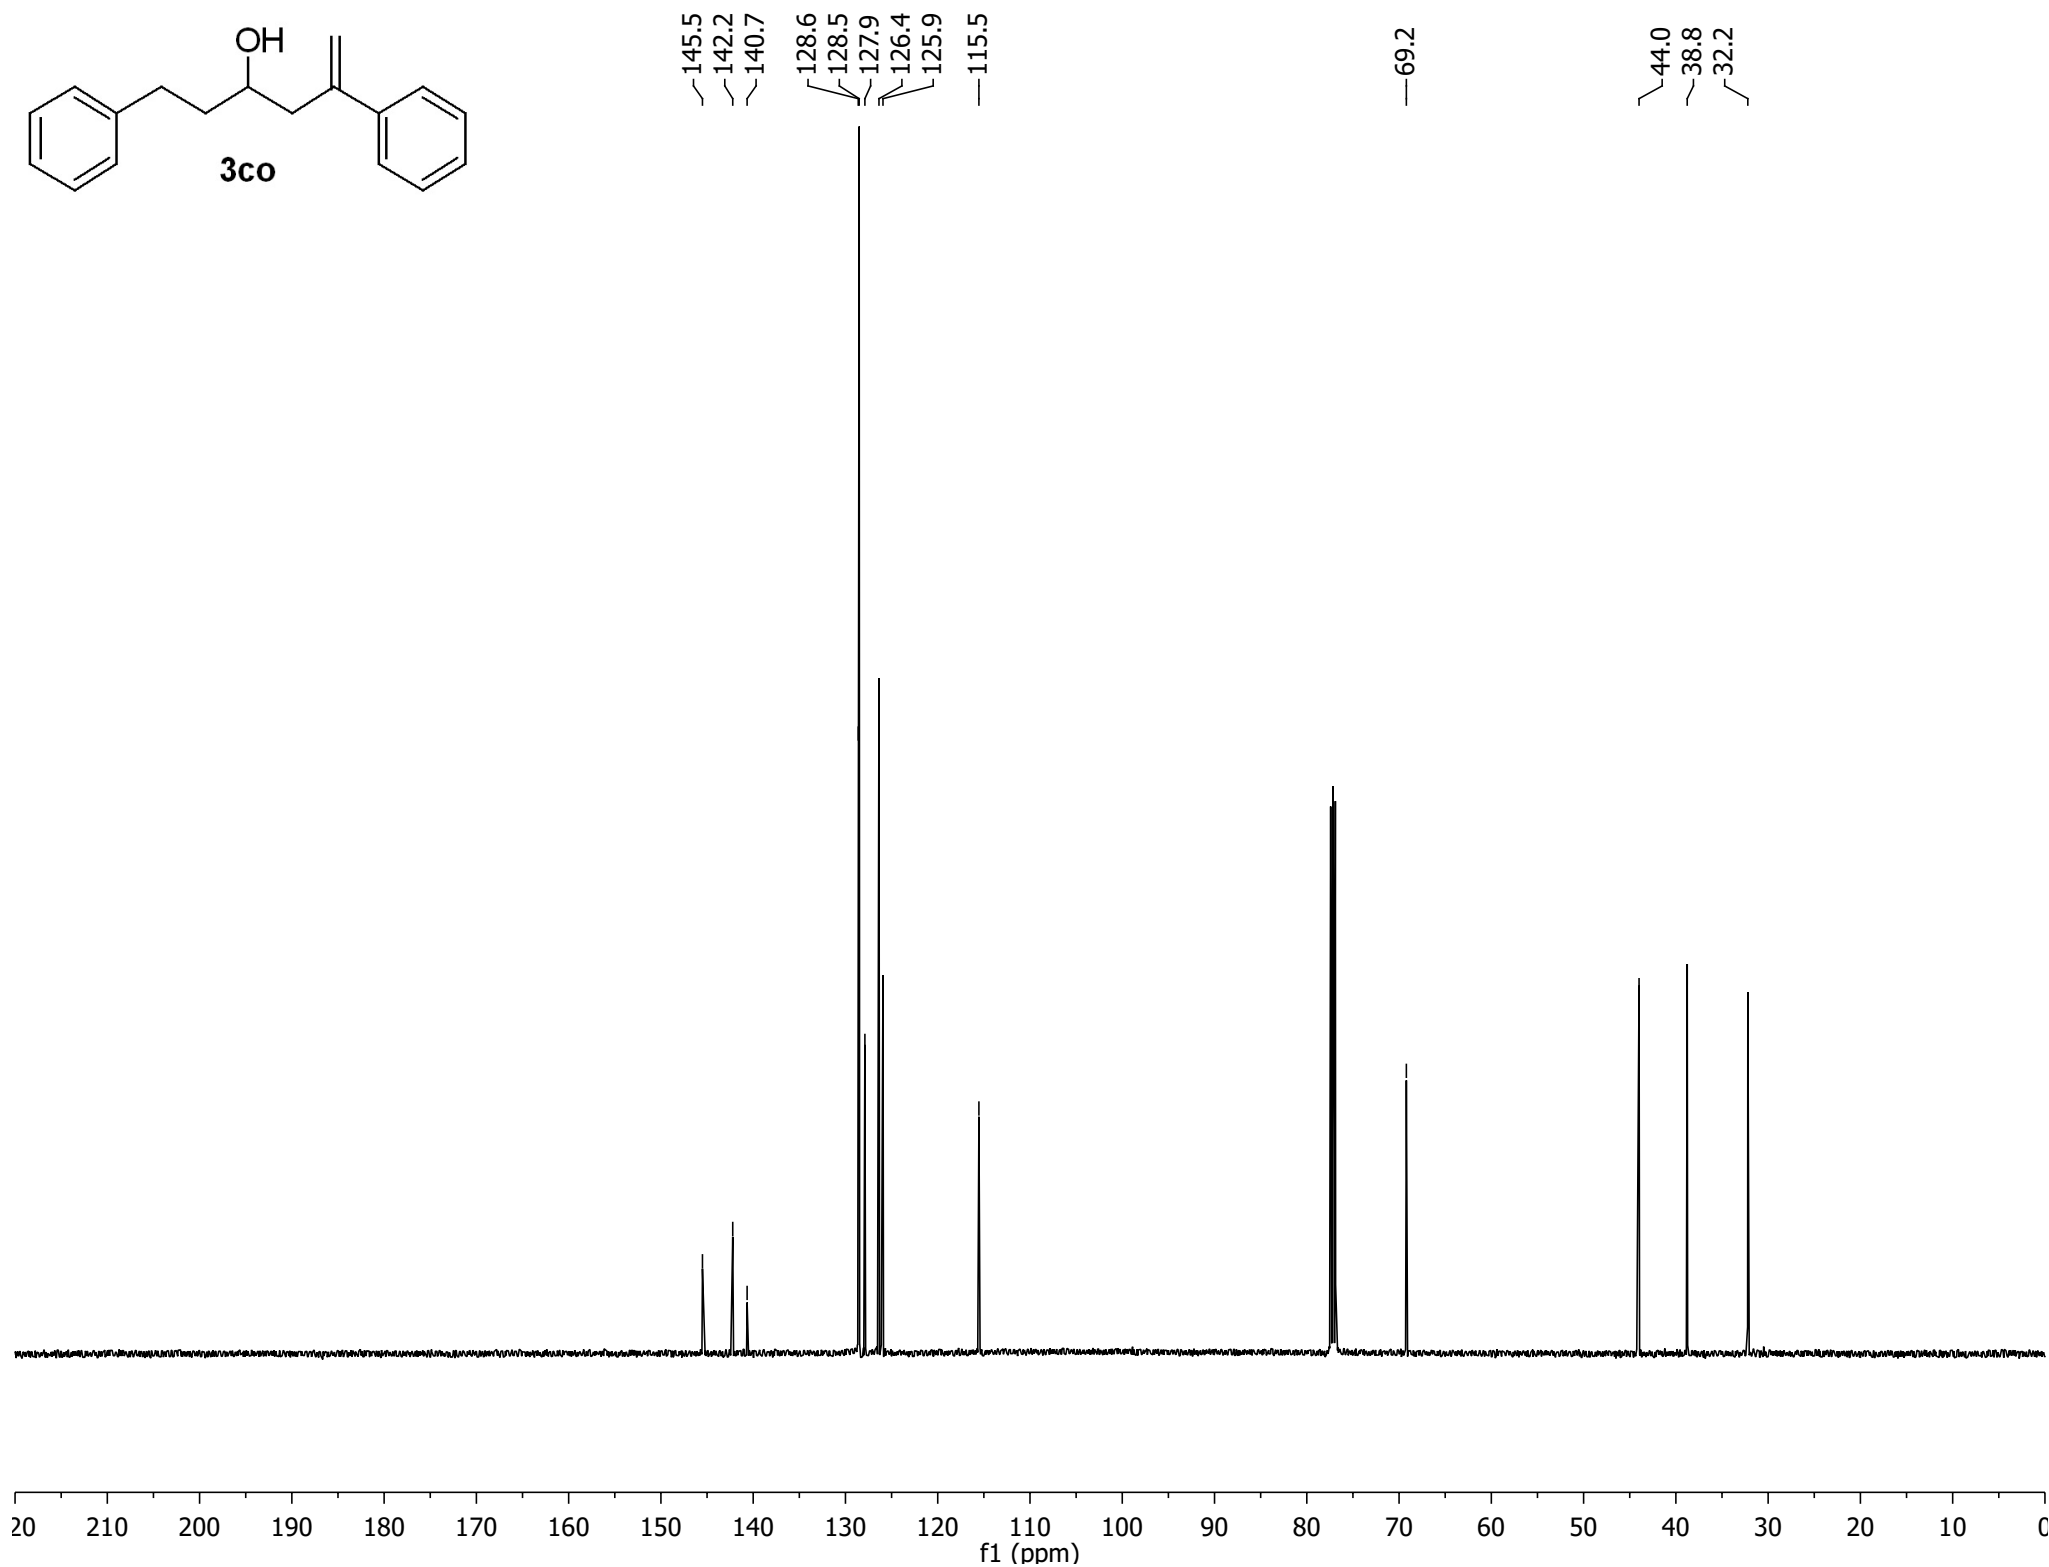



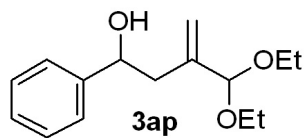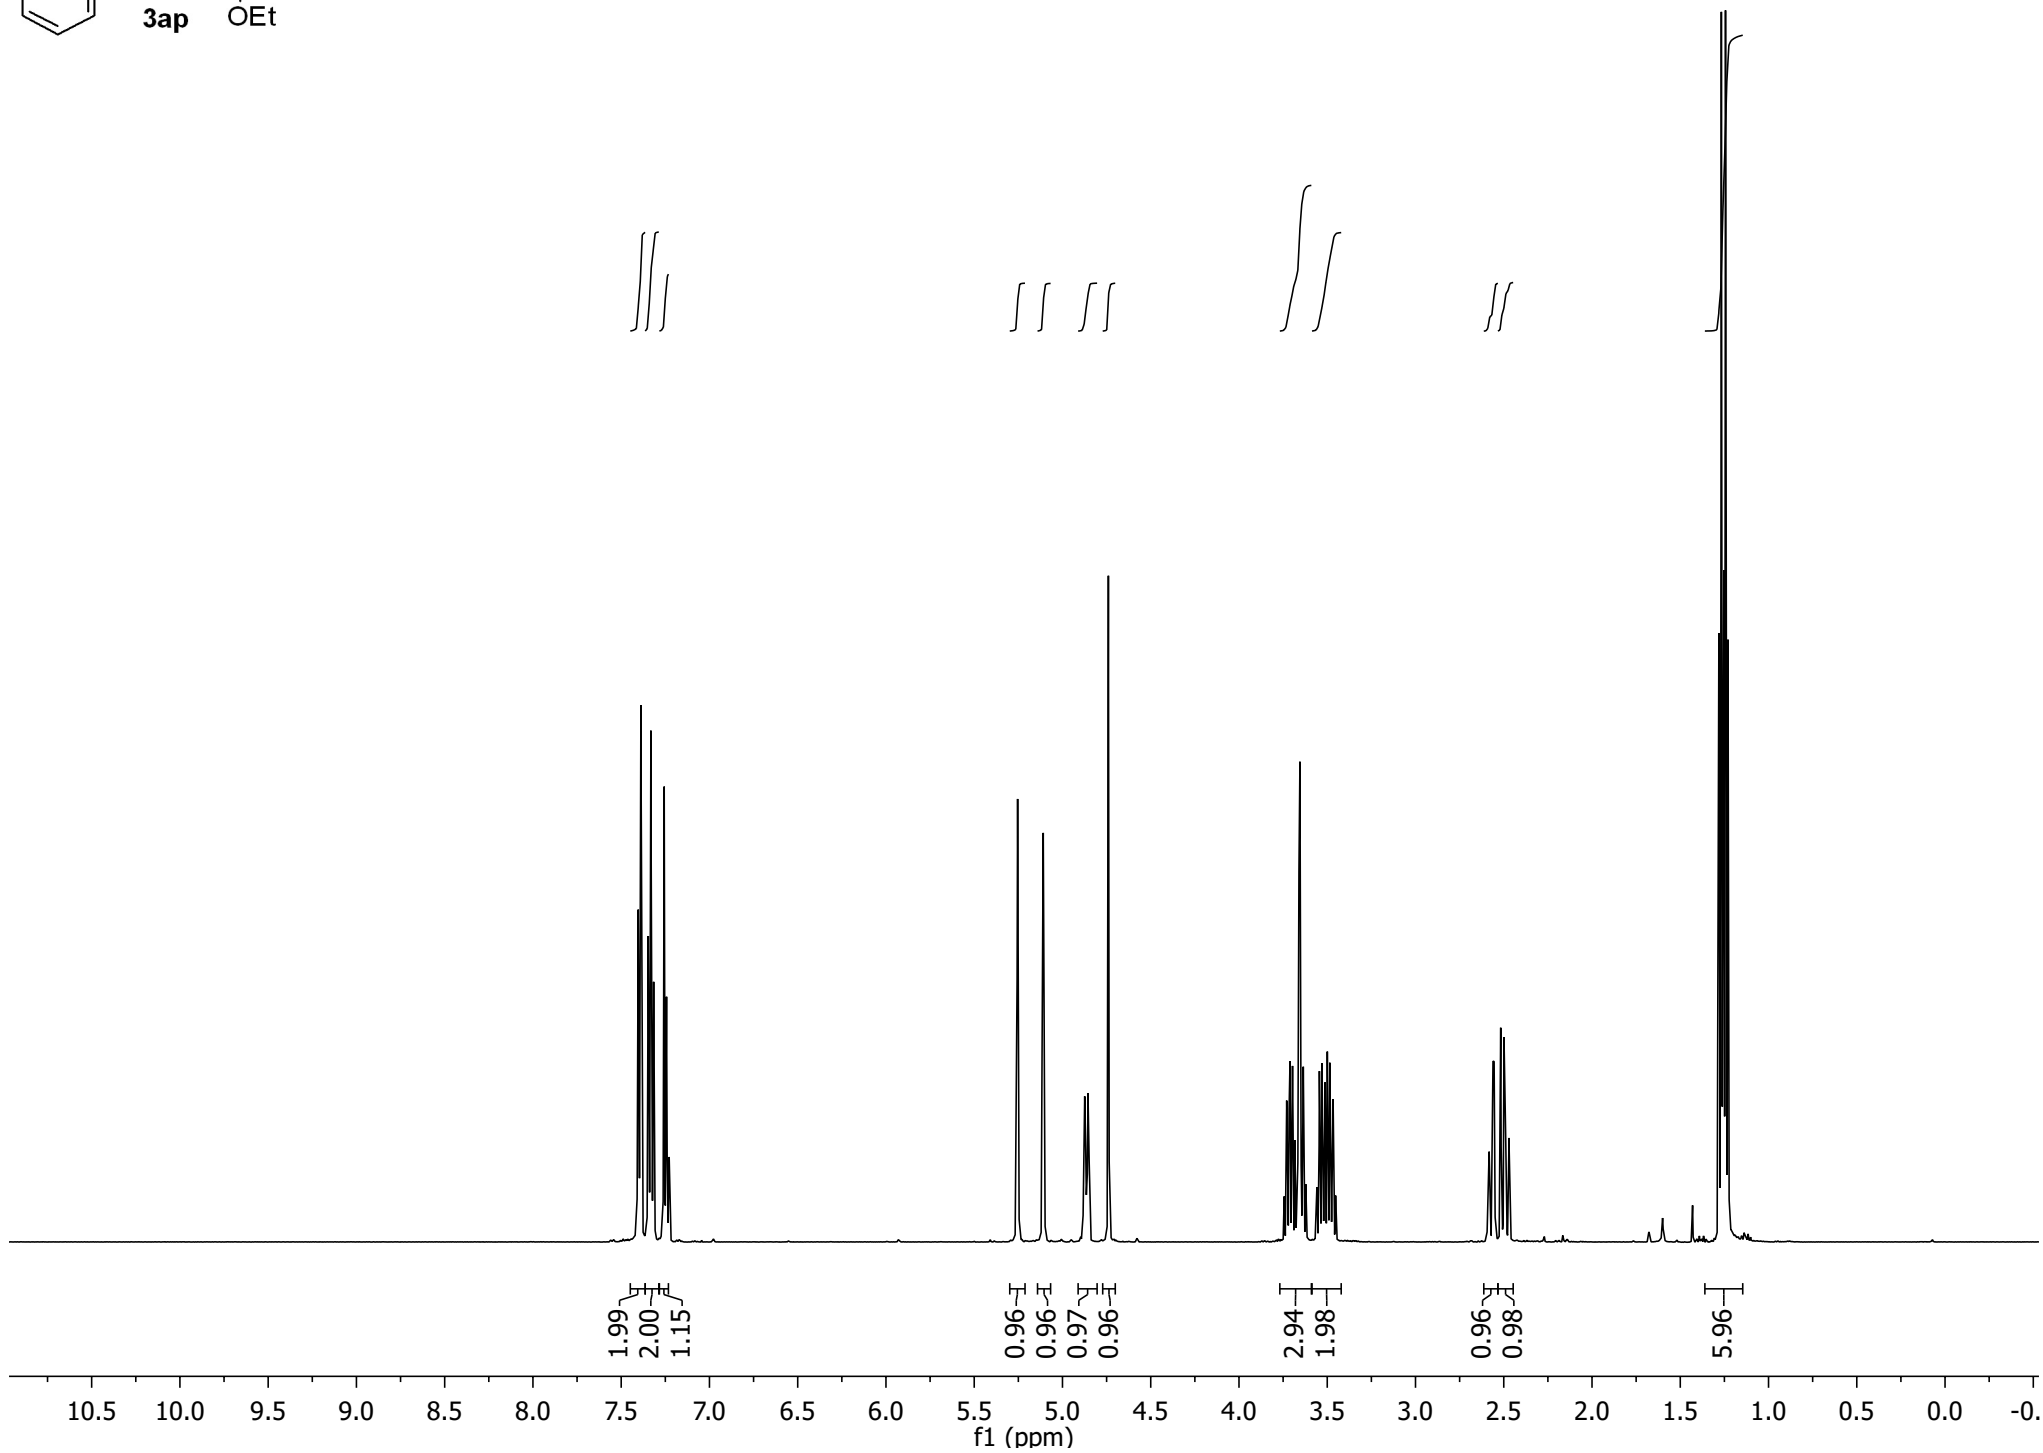

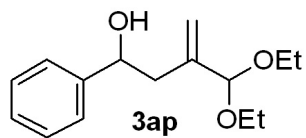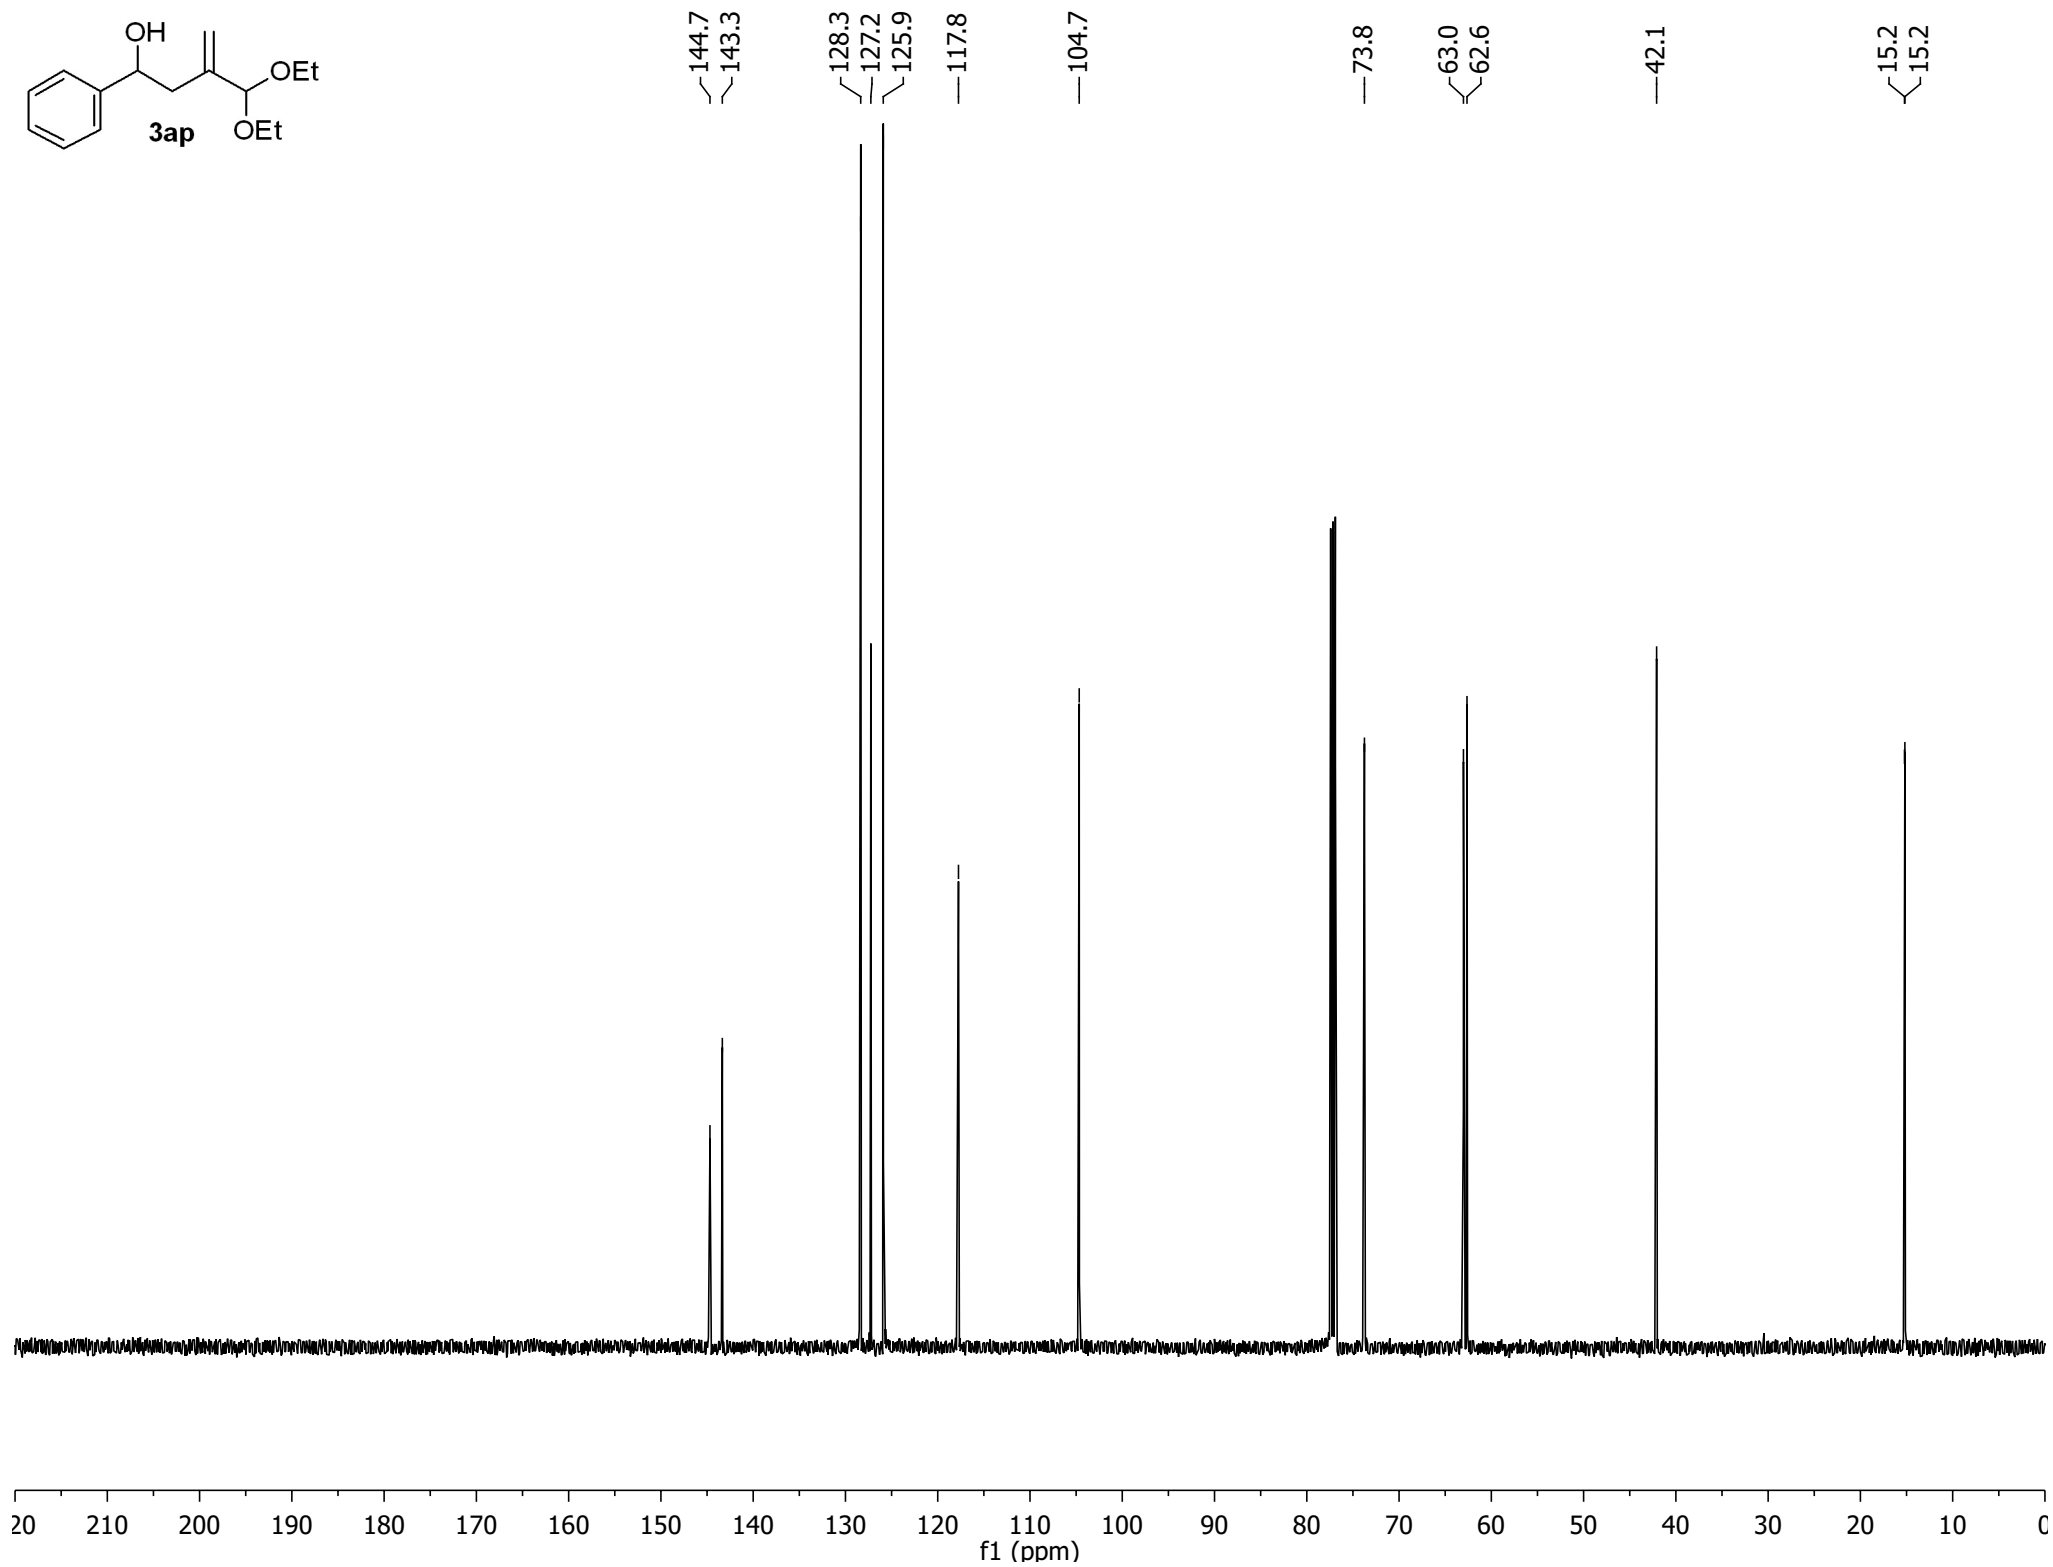

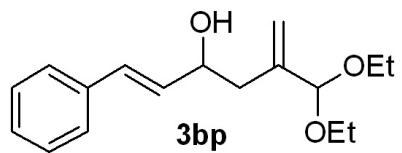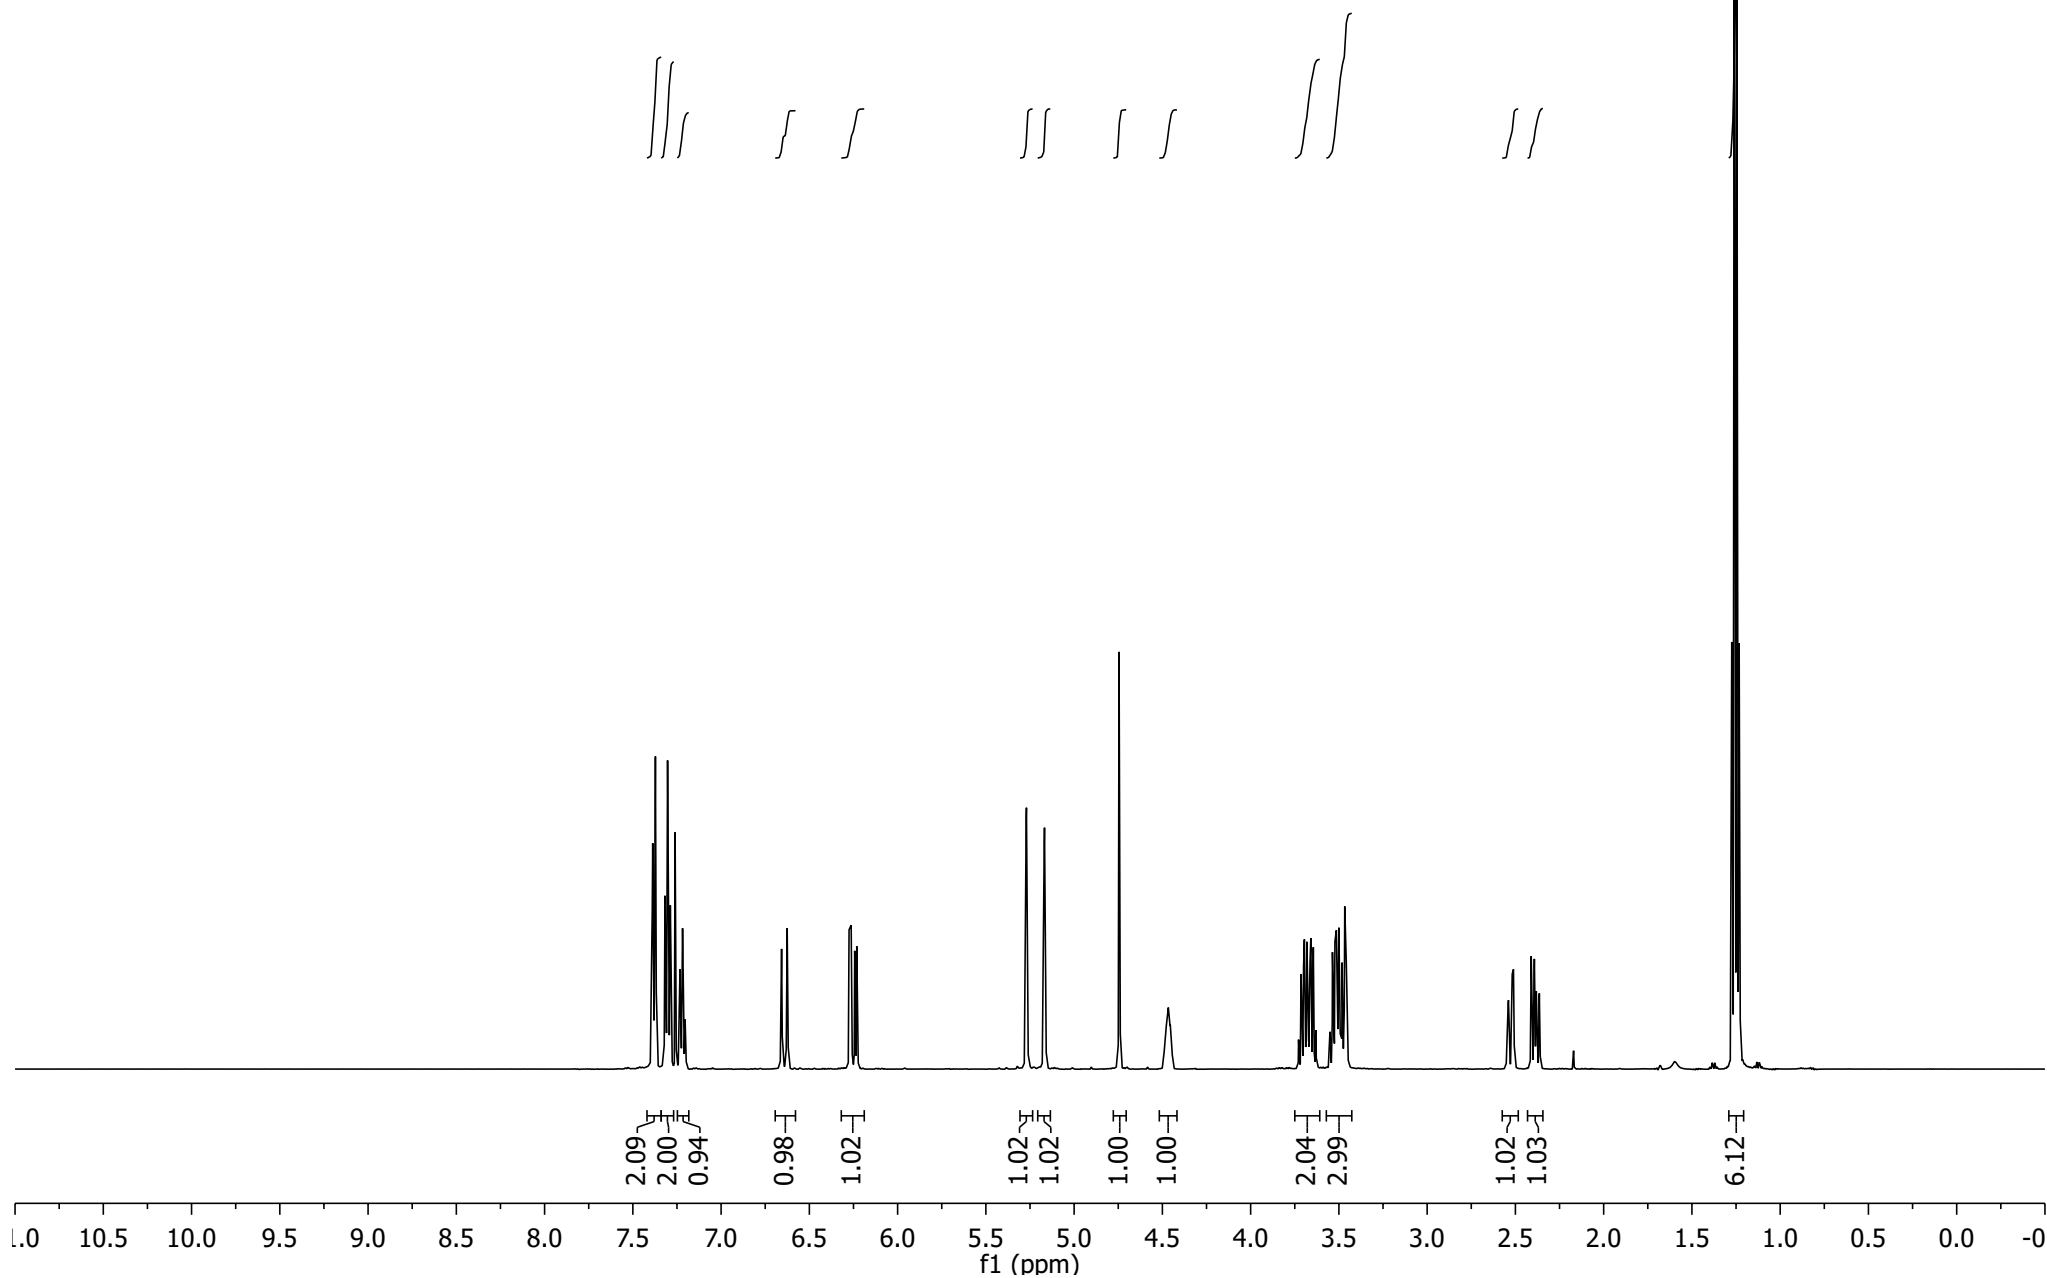

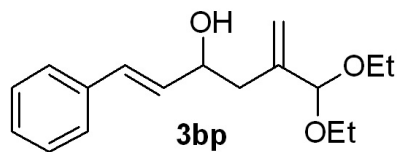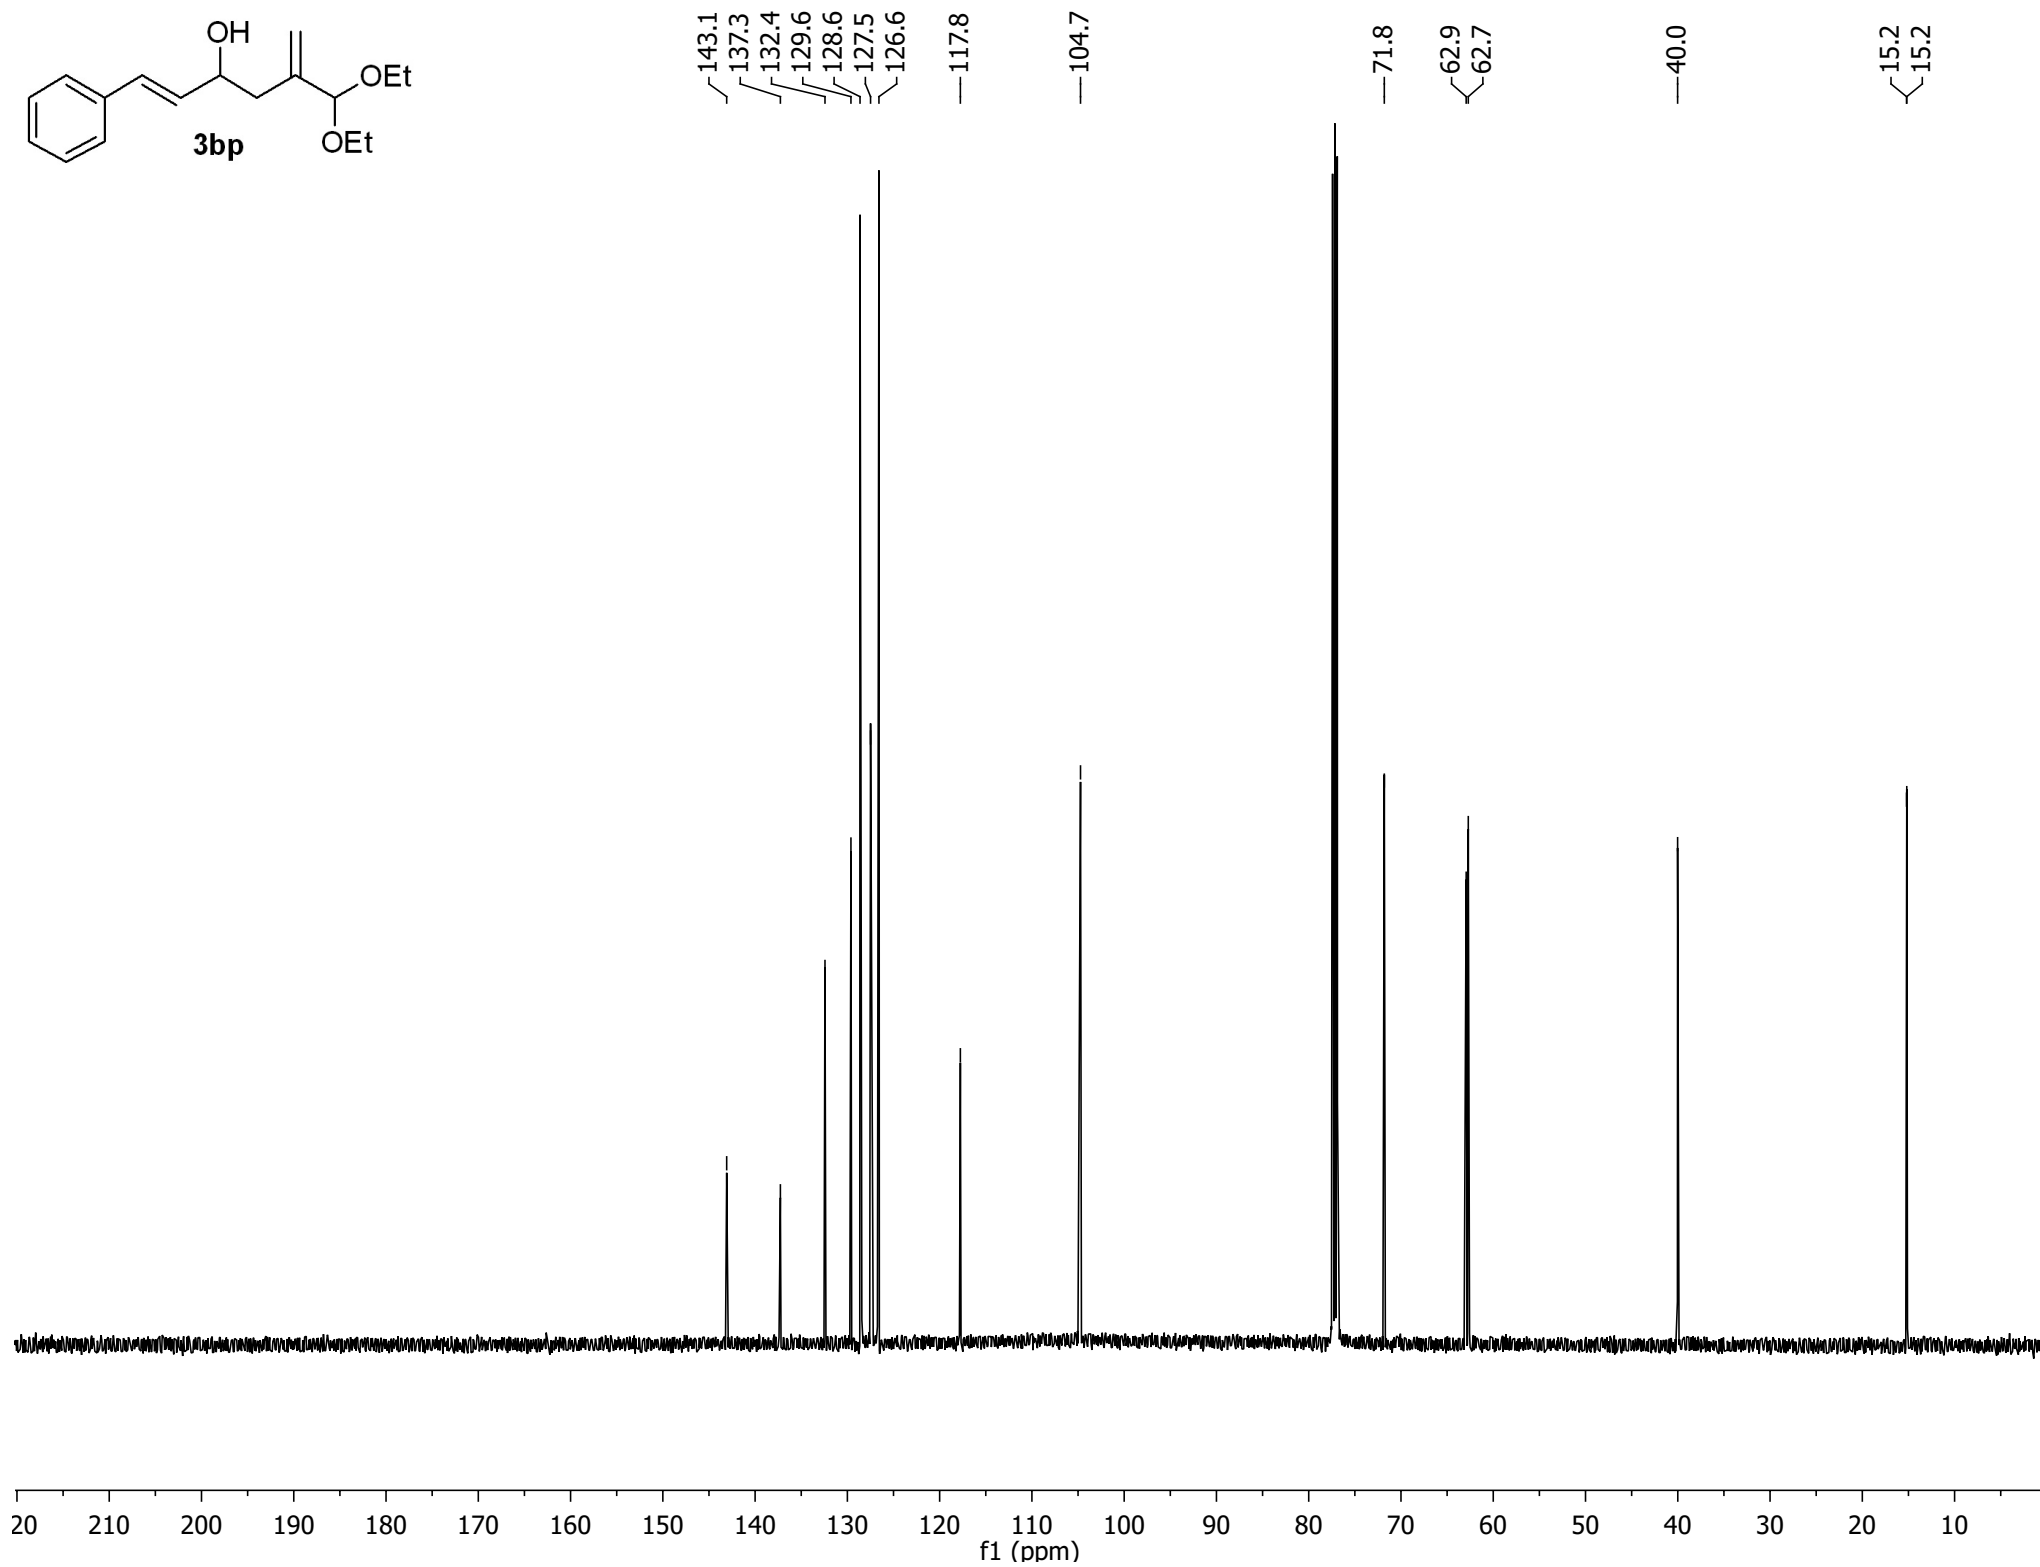

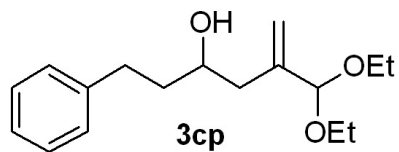

$\sim$ 143.7  
 $\sim$ 142.6  
 $\sim$ 128.6  
 $\sim$ 128.4  
 $\sim$ 125.8  
 $\sim$ 117.3  
 $\sim$ 104.8  
 $\sim$ 70.4  
 $\sim$ 63.0  
 $\sim$ 62.6  
 $\sim$ 39.8  
 $\sim$ 39.3  
 $\sim$ 32.4  
 $\sim$ 15.2  
 $\sim$ 15.2

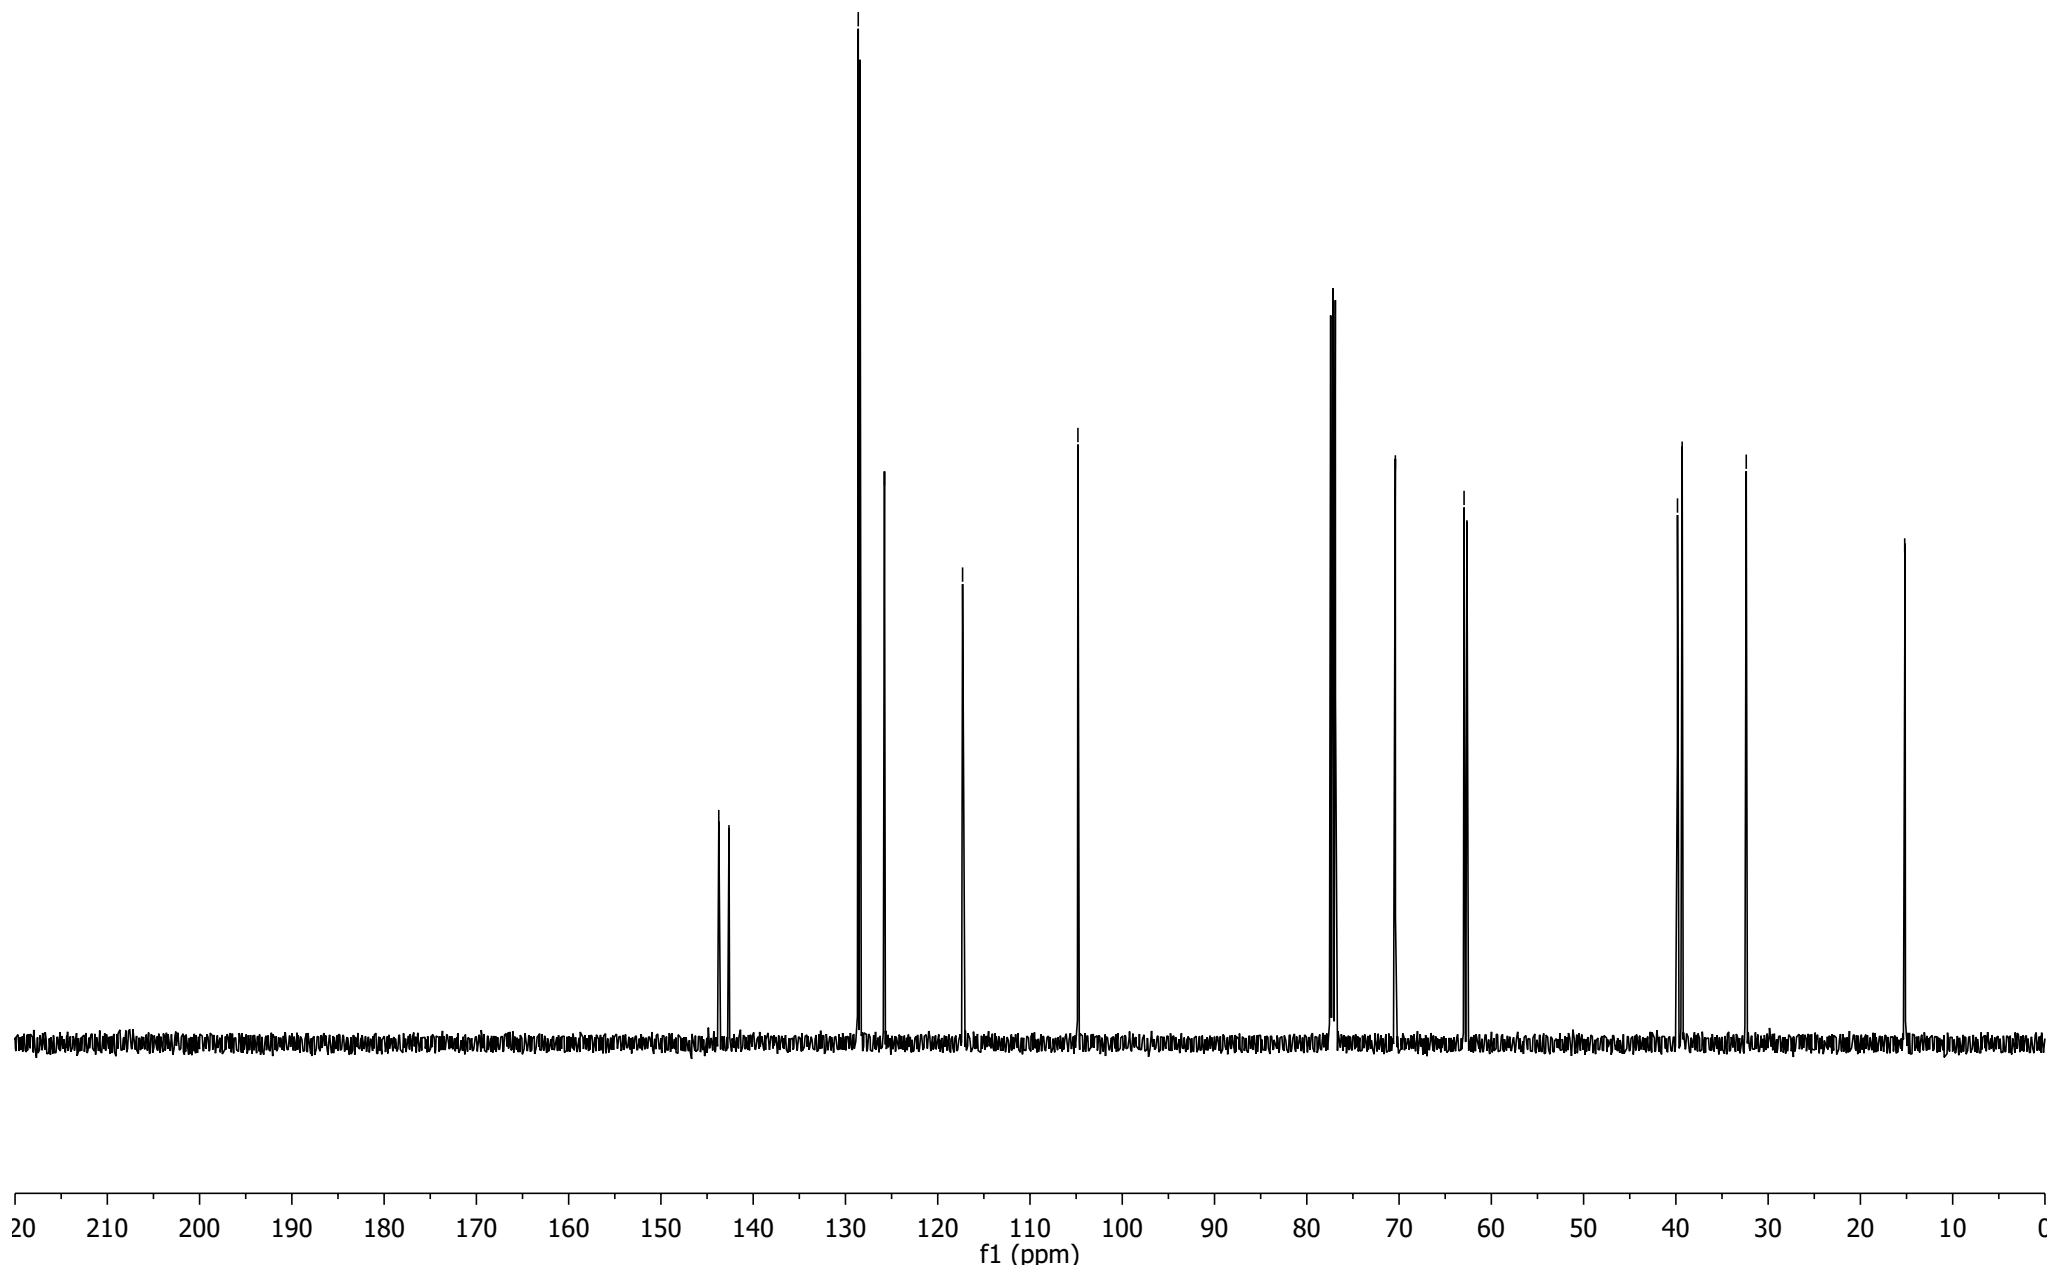

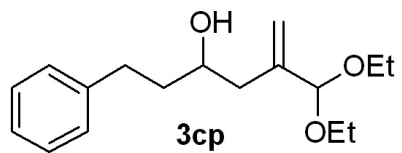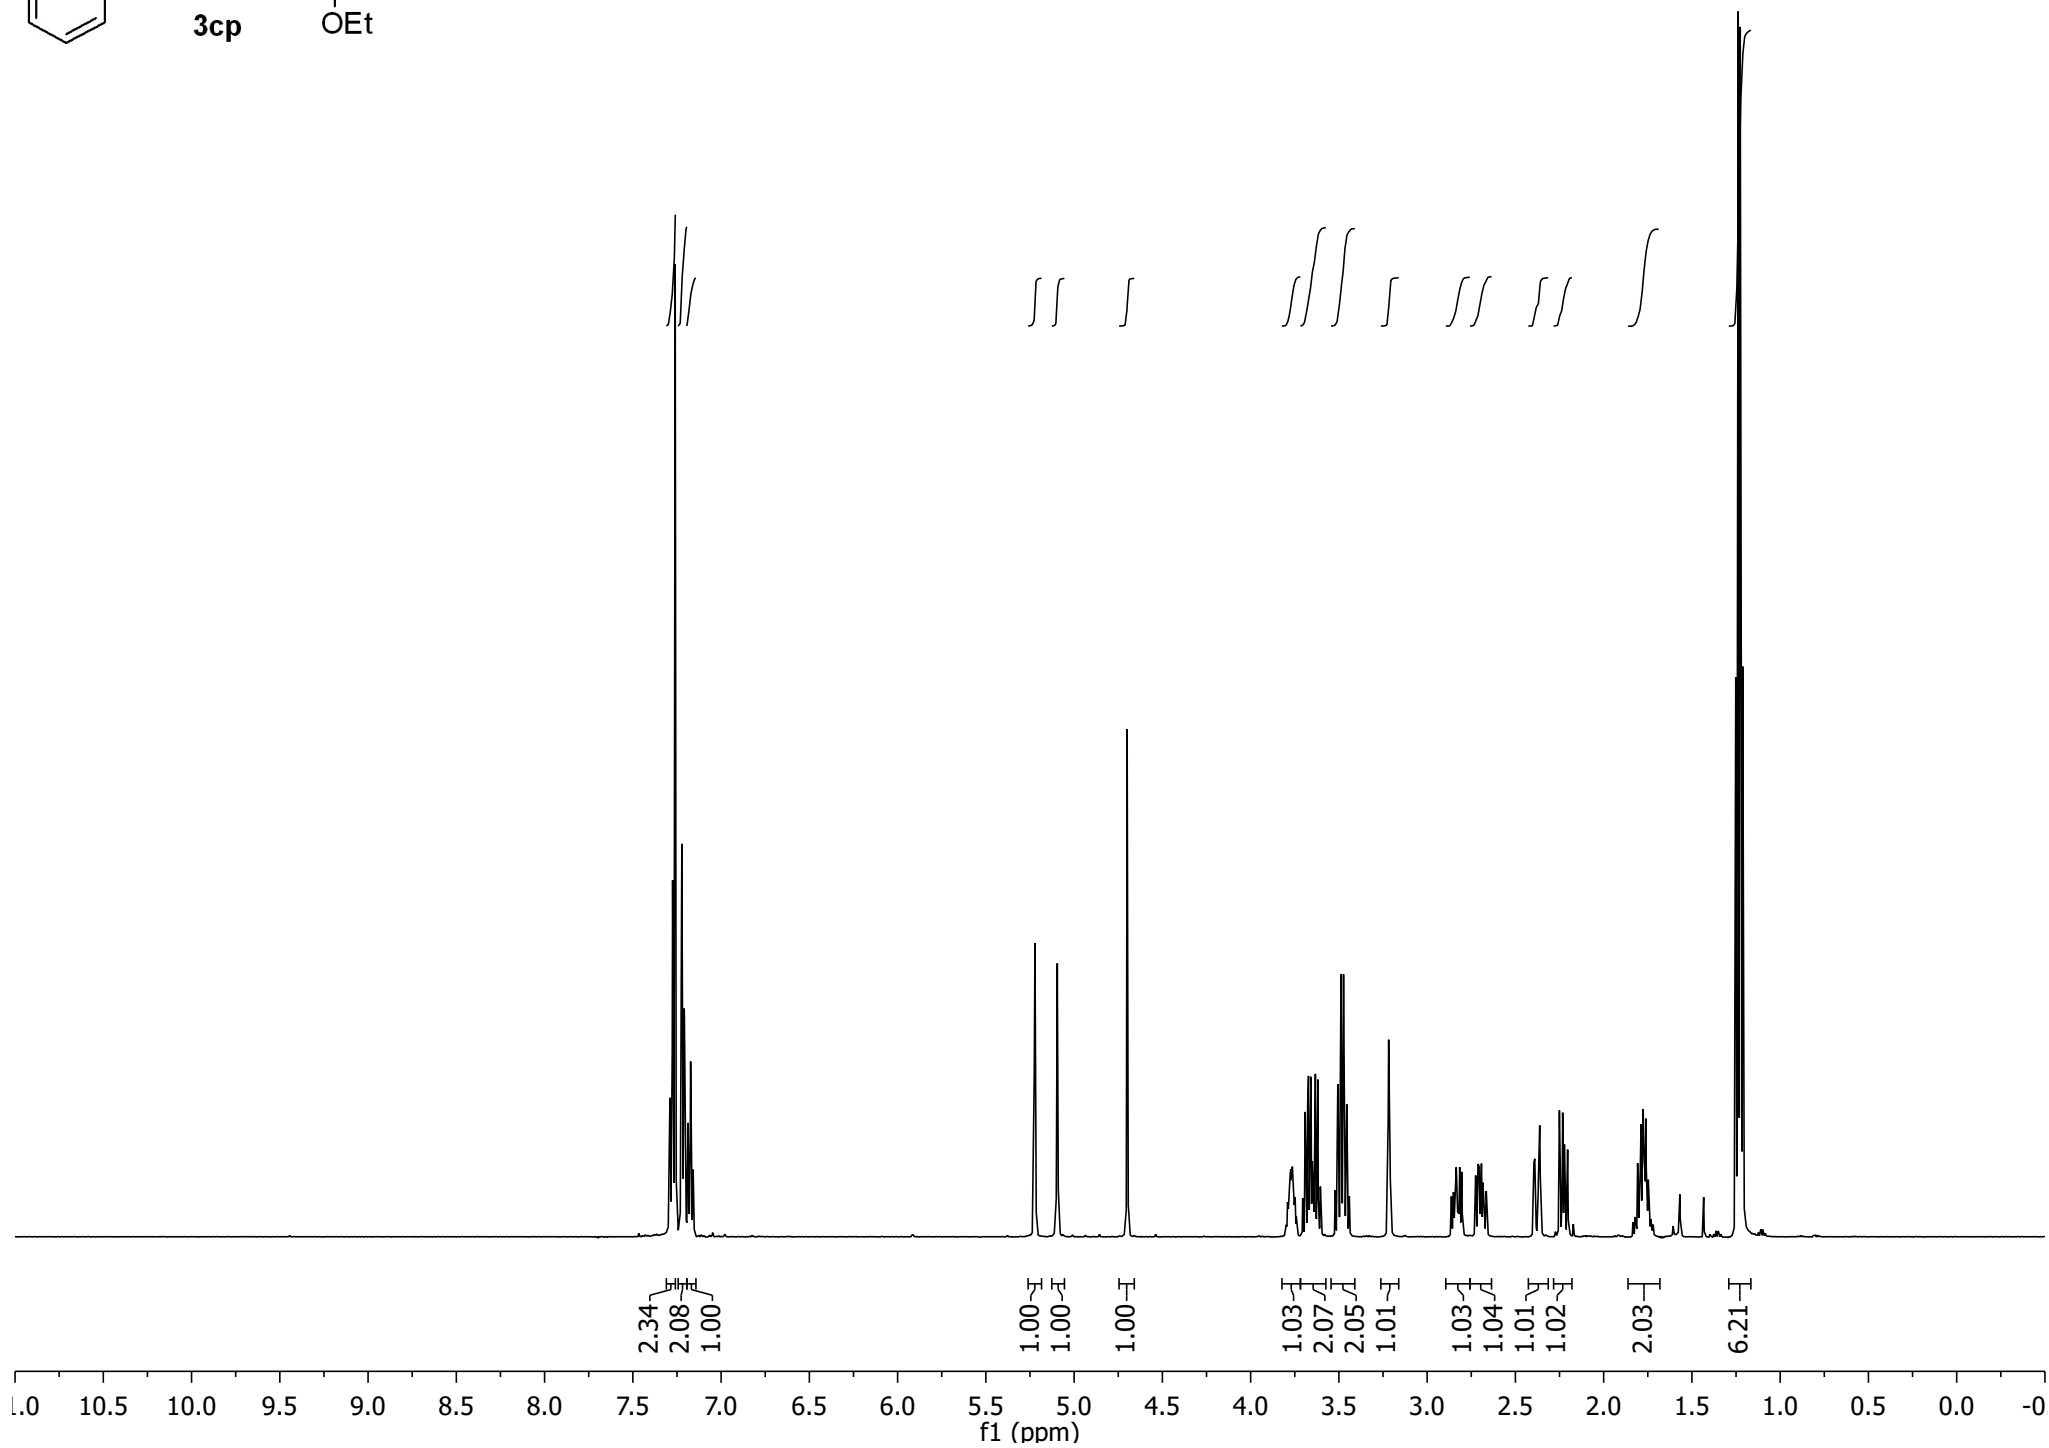

Supplement: Supplementary file 1 [file 3913834]
